# Supplementary material for: CXCR3+ LEF1low NK cells cause immunopathological hepatic damage in MASH
Source: Research Square preprint supplement (doi:10.21203/rs.3.rs-8654560/v1), 2026-02-11
Supplement: Supplementary file 1 [file 313ccfcc1be516e5db11655e.docx]

All authors hereby declare that they have no financial or personal relationships with any individuals or organizations that could inappropriately influence or bias the content of this work. No specific funding or other benefits were received for the preparation of this work.
