# Supplementary material for: CXCR3+ LEF1low NK cells cause immunopathological hepatic damage in MASH
Source: Research Square preprint supplement (doi:10.21203/rs.3.rs-8654560/v1), 2026-02-11
Supplement: Supplementary file 2 [file 6868db9b436c45c927e8a9f0.docx]

**CXCR3+ LEF1low NK cells cause** **immunopathological** **hepatic damage in MASH**

Jiaqiang Bo 2, 3, #, *, Jie Yang 3, 4, #, Chen Li2, Jia Zheng3, Jianzhong Song1,*

1. Department of Pharmacy, Tumor Hospital Affiliated to Xinjiang Medical University, Urumqi, 8 830011, China

2. School of Life Science and Technology, Southeast University, Nanjing 211198, China.

3. School of Life Science and Technology, China Pharmaceutical University, Nanjing 211198, China.

4. State Key Laboratory of Natural Medicines and School of Life Science and Technology, China Pharmaceutical University, Nanjing 211198, China.

5. Department of Endocrinology, Nanjing Drum Tower Hospital, School of Life Science and Technology, China Pharmaceutical University, Nanjing 211198, China.

* Corresponding authors.

# Contributed equally to this work.


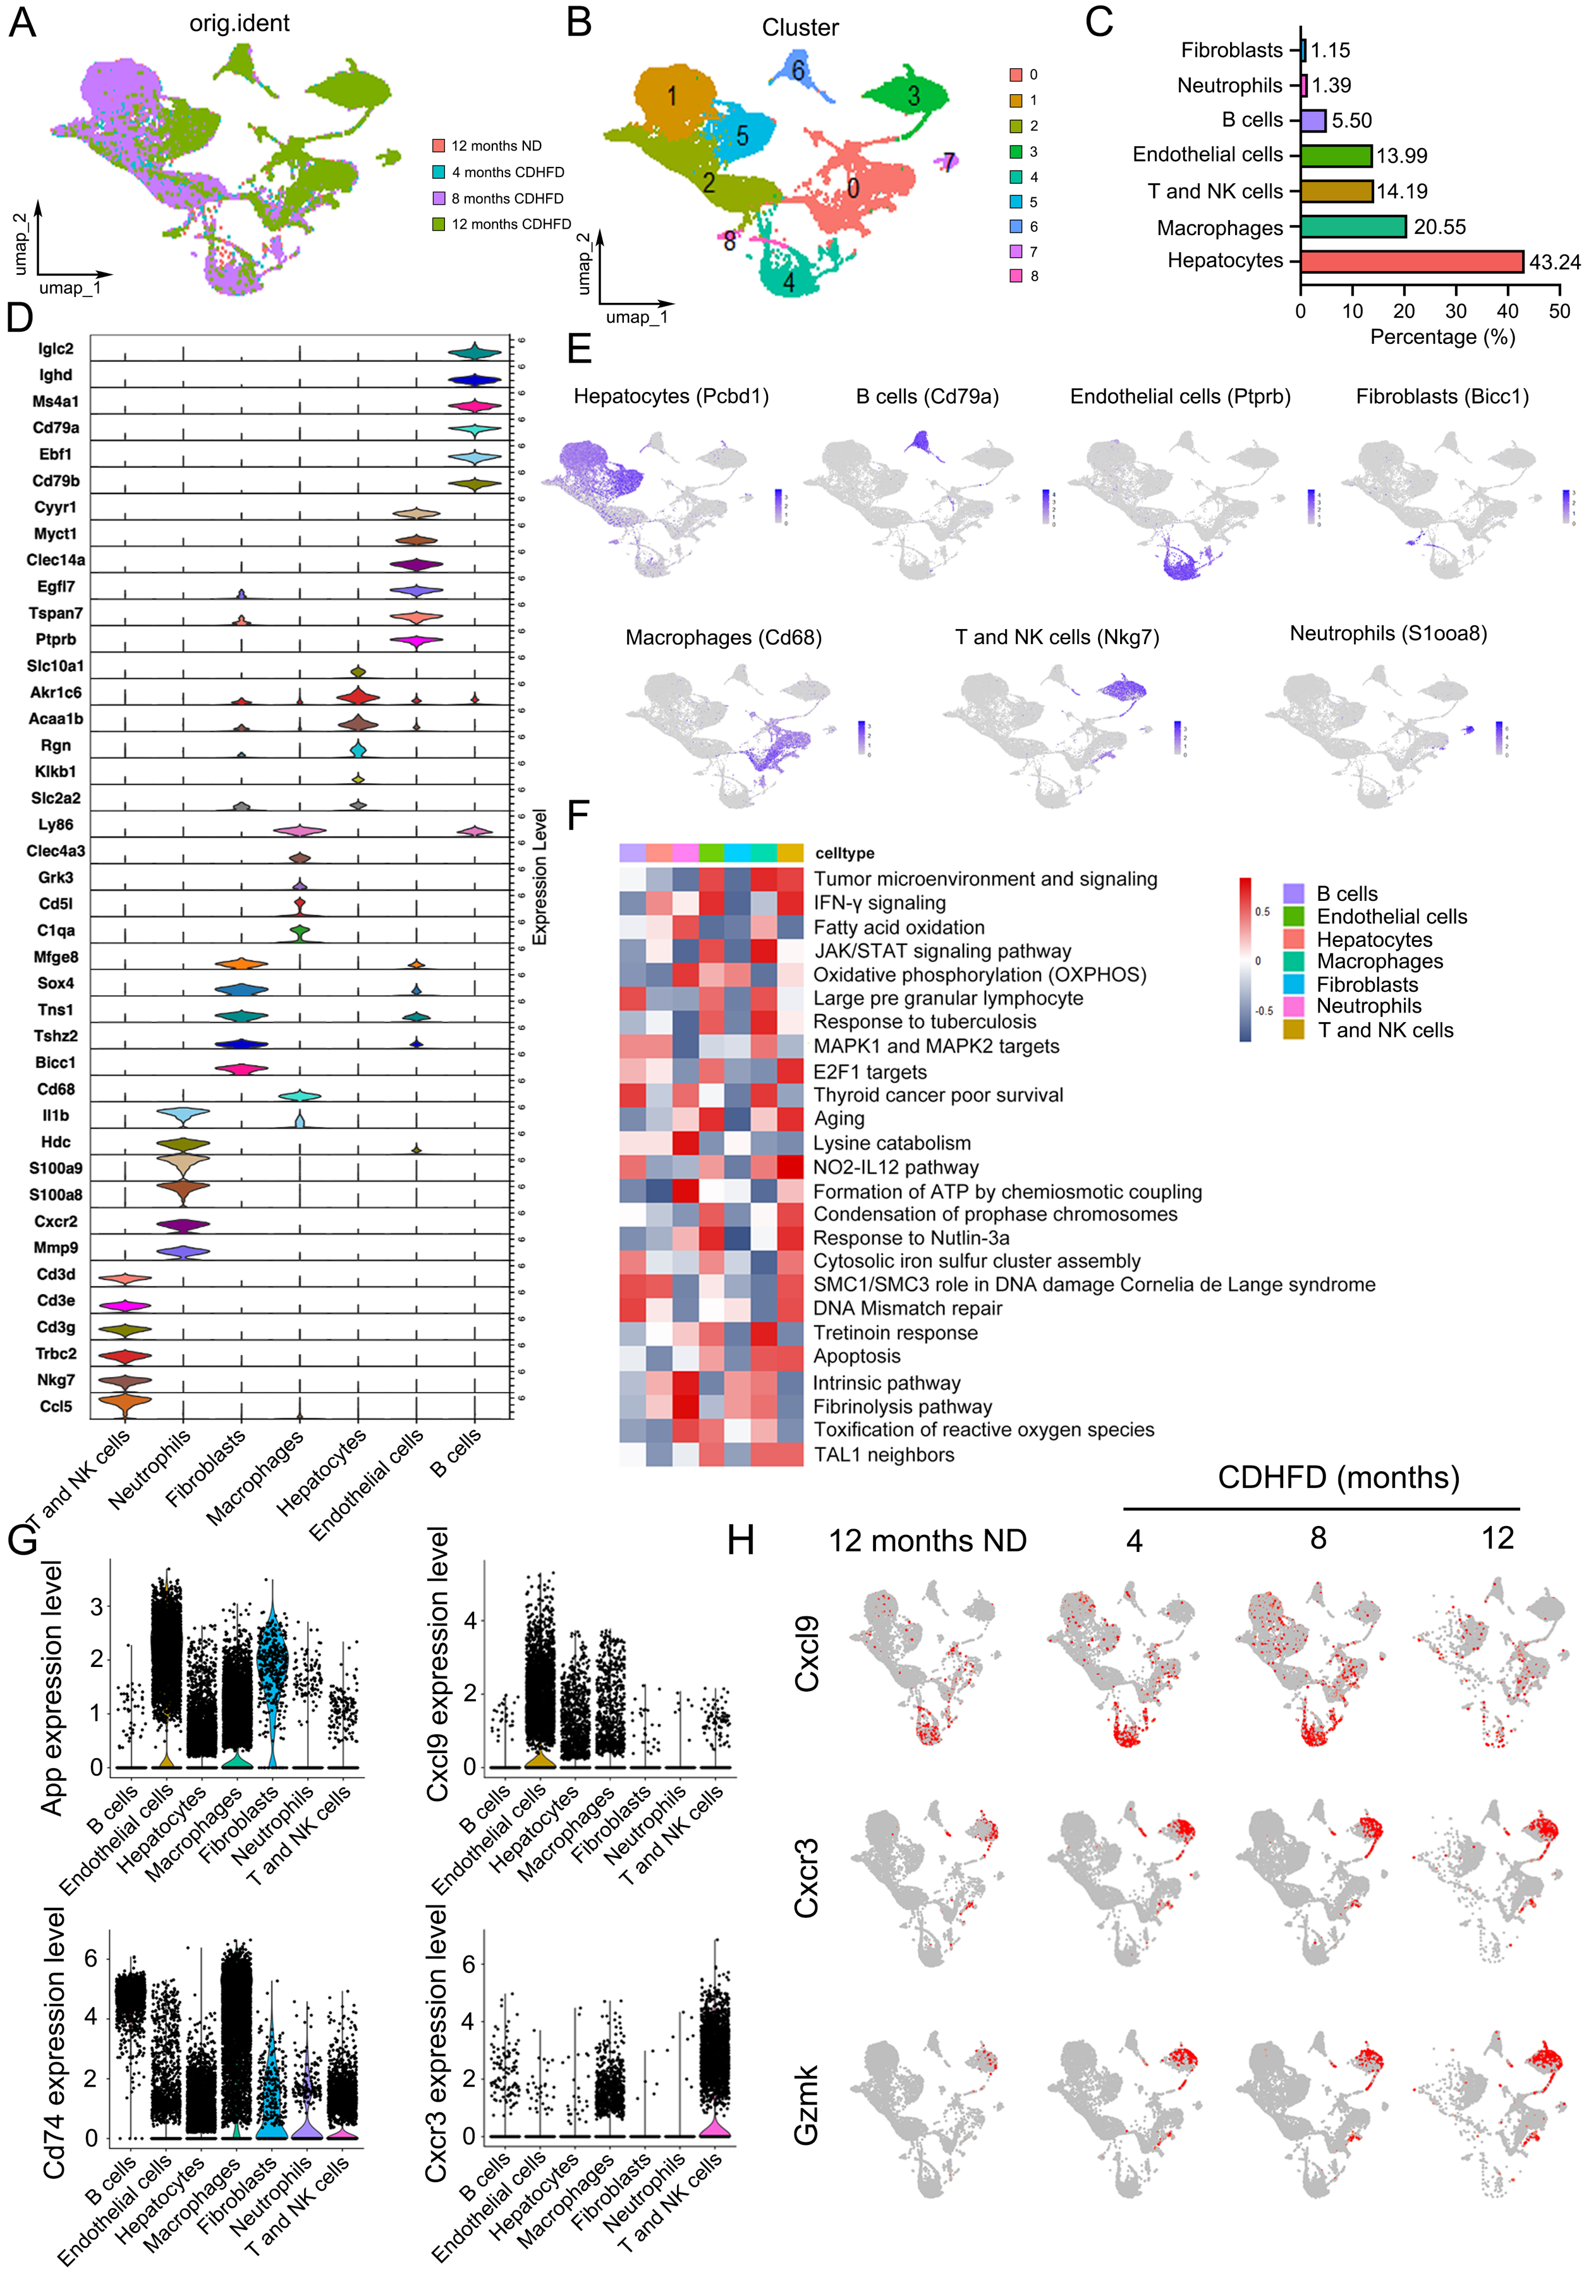


**Figure S1. Single-cell RNA sequencing analysis reveals cell type composition, heterogeneity, and molecular features in the liver from MASH mouse.**

**A**. Significant differences were observed in the liver cell population composition between the CDHFD group and the ND group mice. **B**. Umap plot showing unsupervised clustering of cells. **All cells were classified into nine clusters based on their highly expressed, cluster-specific genes.** C. Bar plot quantifying the percentage of major cell populations identified: Hepatocytes (43.24%), Macrophages (20.55%), T and NK cells (14.19%), Endothelial cells (13.99%), Neutrophils (11.39%), Fibroblasts (11.15%), and B cells (5.50%). **D**. The stacked violin plot shows the marker genes (top 6) that are highly expressed in each cellular subpopulation. **E**. Umap plots visualizing the spatial distribution of cells, annotated by major cell type using canonical marker genes. F. GSEA enrichment analysis of each cellular population. **G**. The violin plot shows the expression levels of App, Cd74, Cxcl9, and Cxcr3 in different cellular populations. **H**. The umap plot shows changes in the expression levels of Cxcl9, Cxcr3, and Gzmk in cellular populations across different samples. UMAP, uniform manifold approximation and projection; CDHFD, choline-deficient high-fat diet; ND, normal diet.


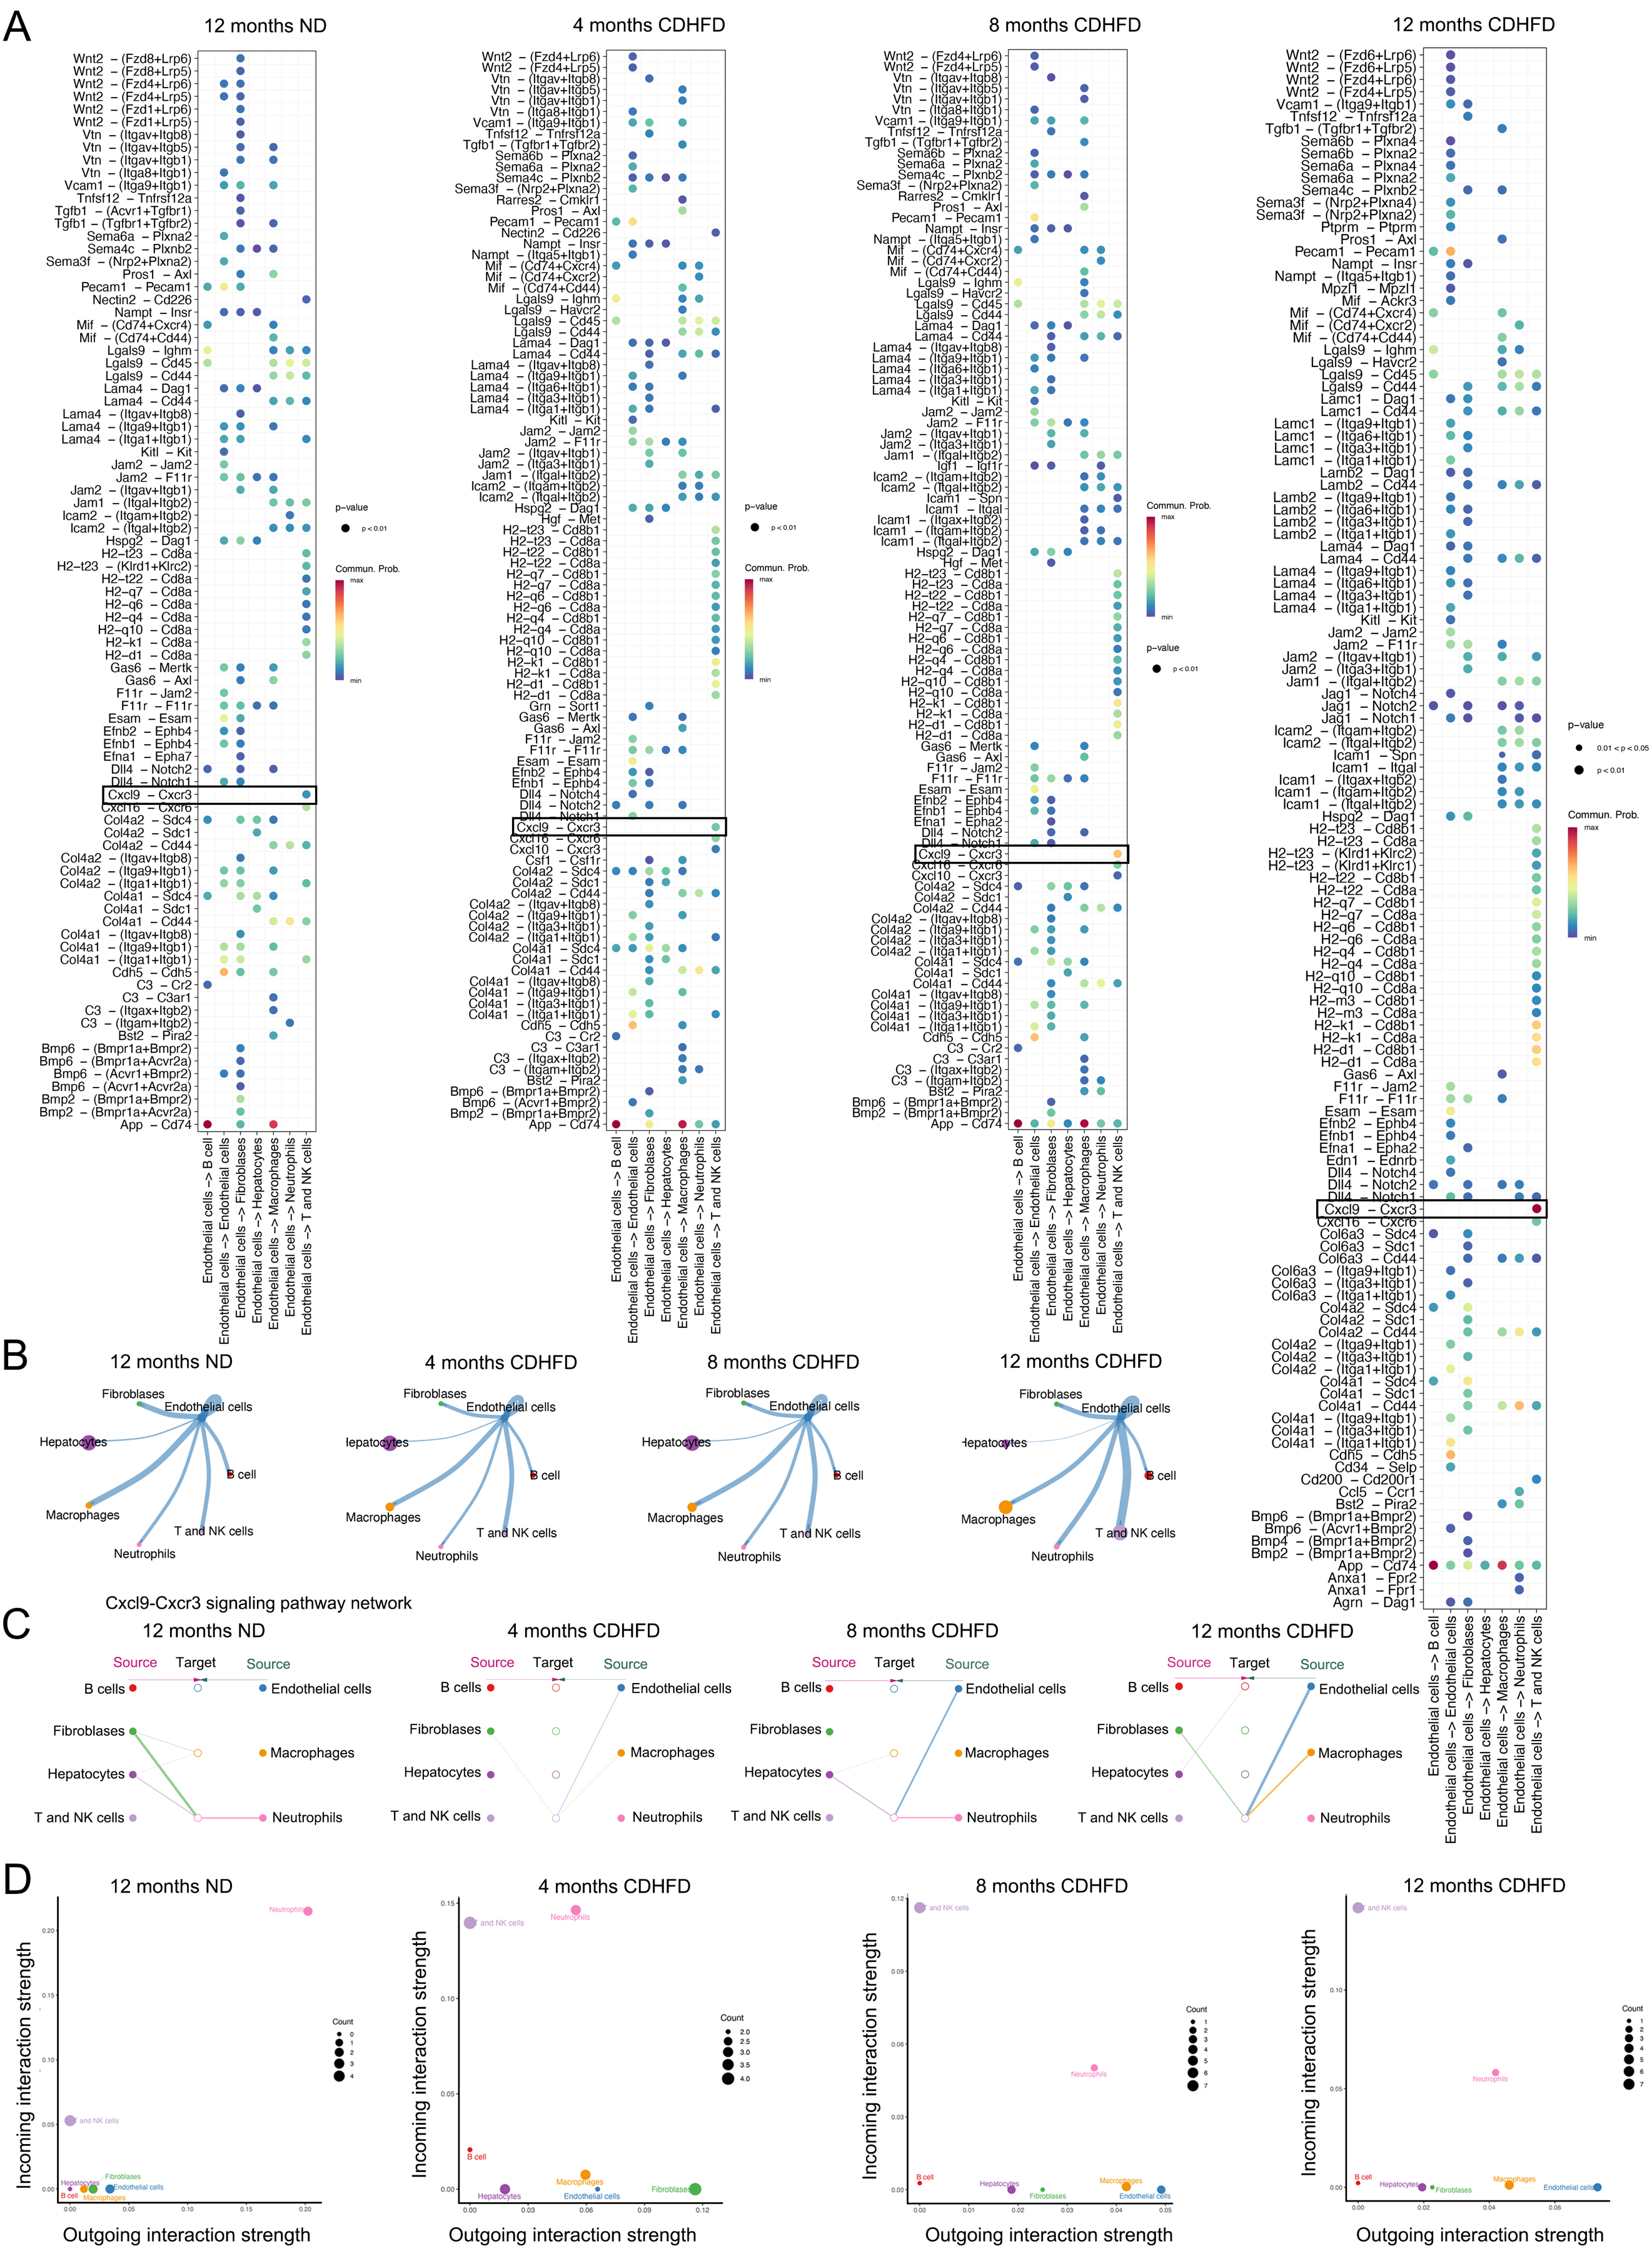


**Figure S2. Analysis of cell-cell communication between endothelial and other cellular populations in MASH.**

**A**. **Ligand-receptor pairs mediating cell-cell communication between endothelial and other cellular populations**. **B**. Communication strength analysis of **endothelial and other cellular populations**. **C**. outgoing interaction strength and incoming interaction strength **across cellular subpopulations during MASH progression.**

**
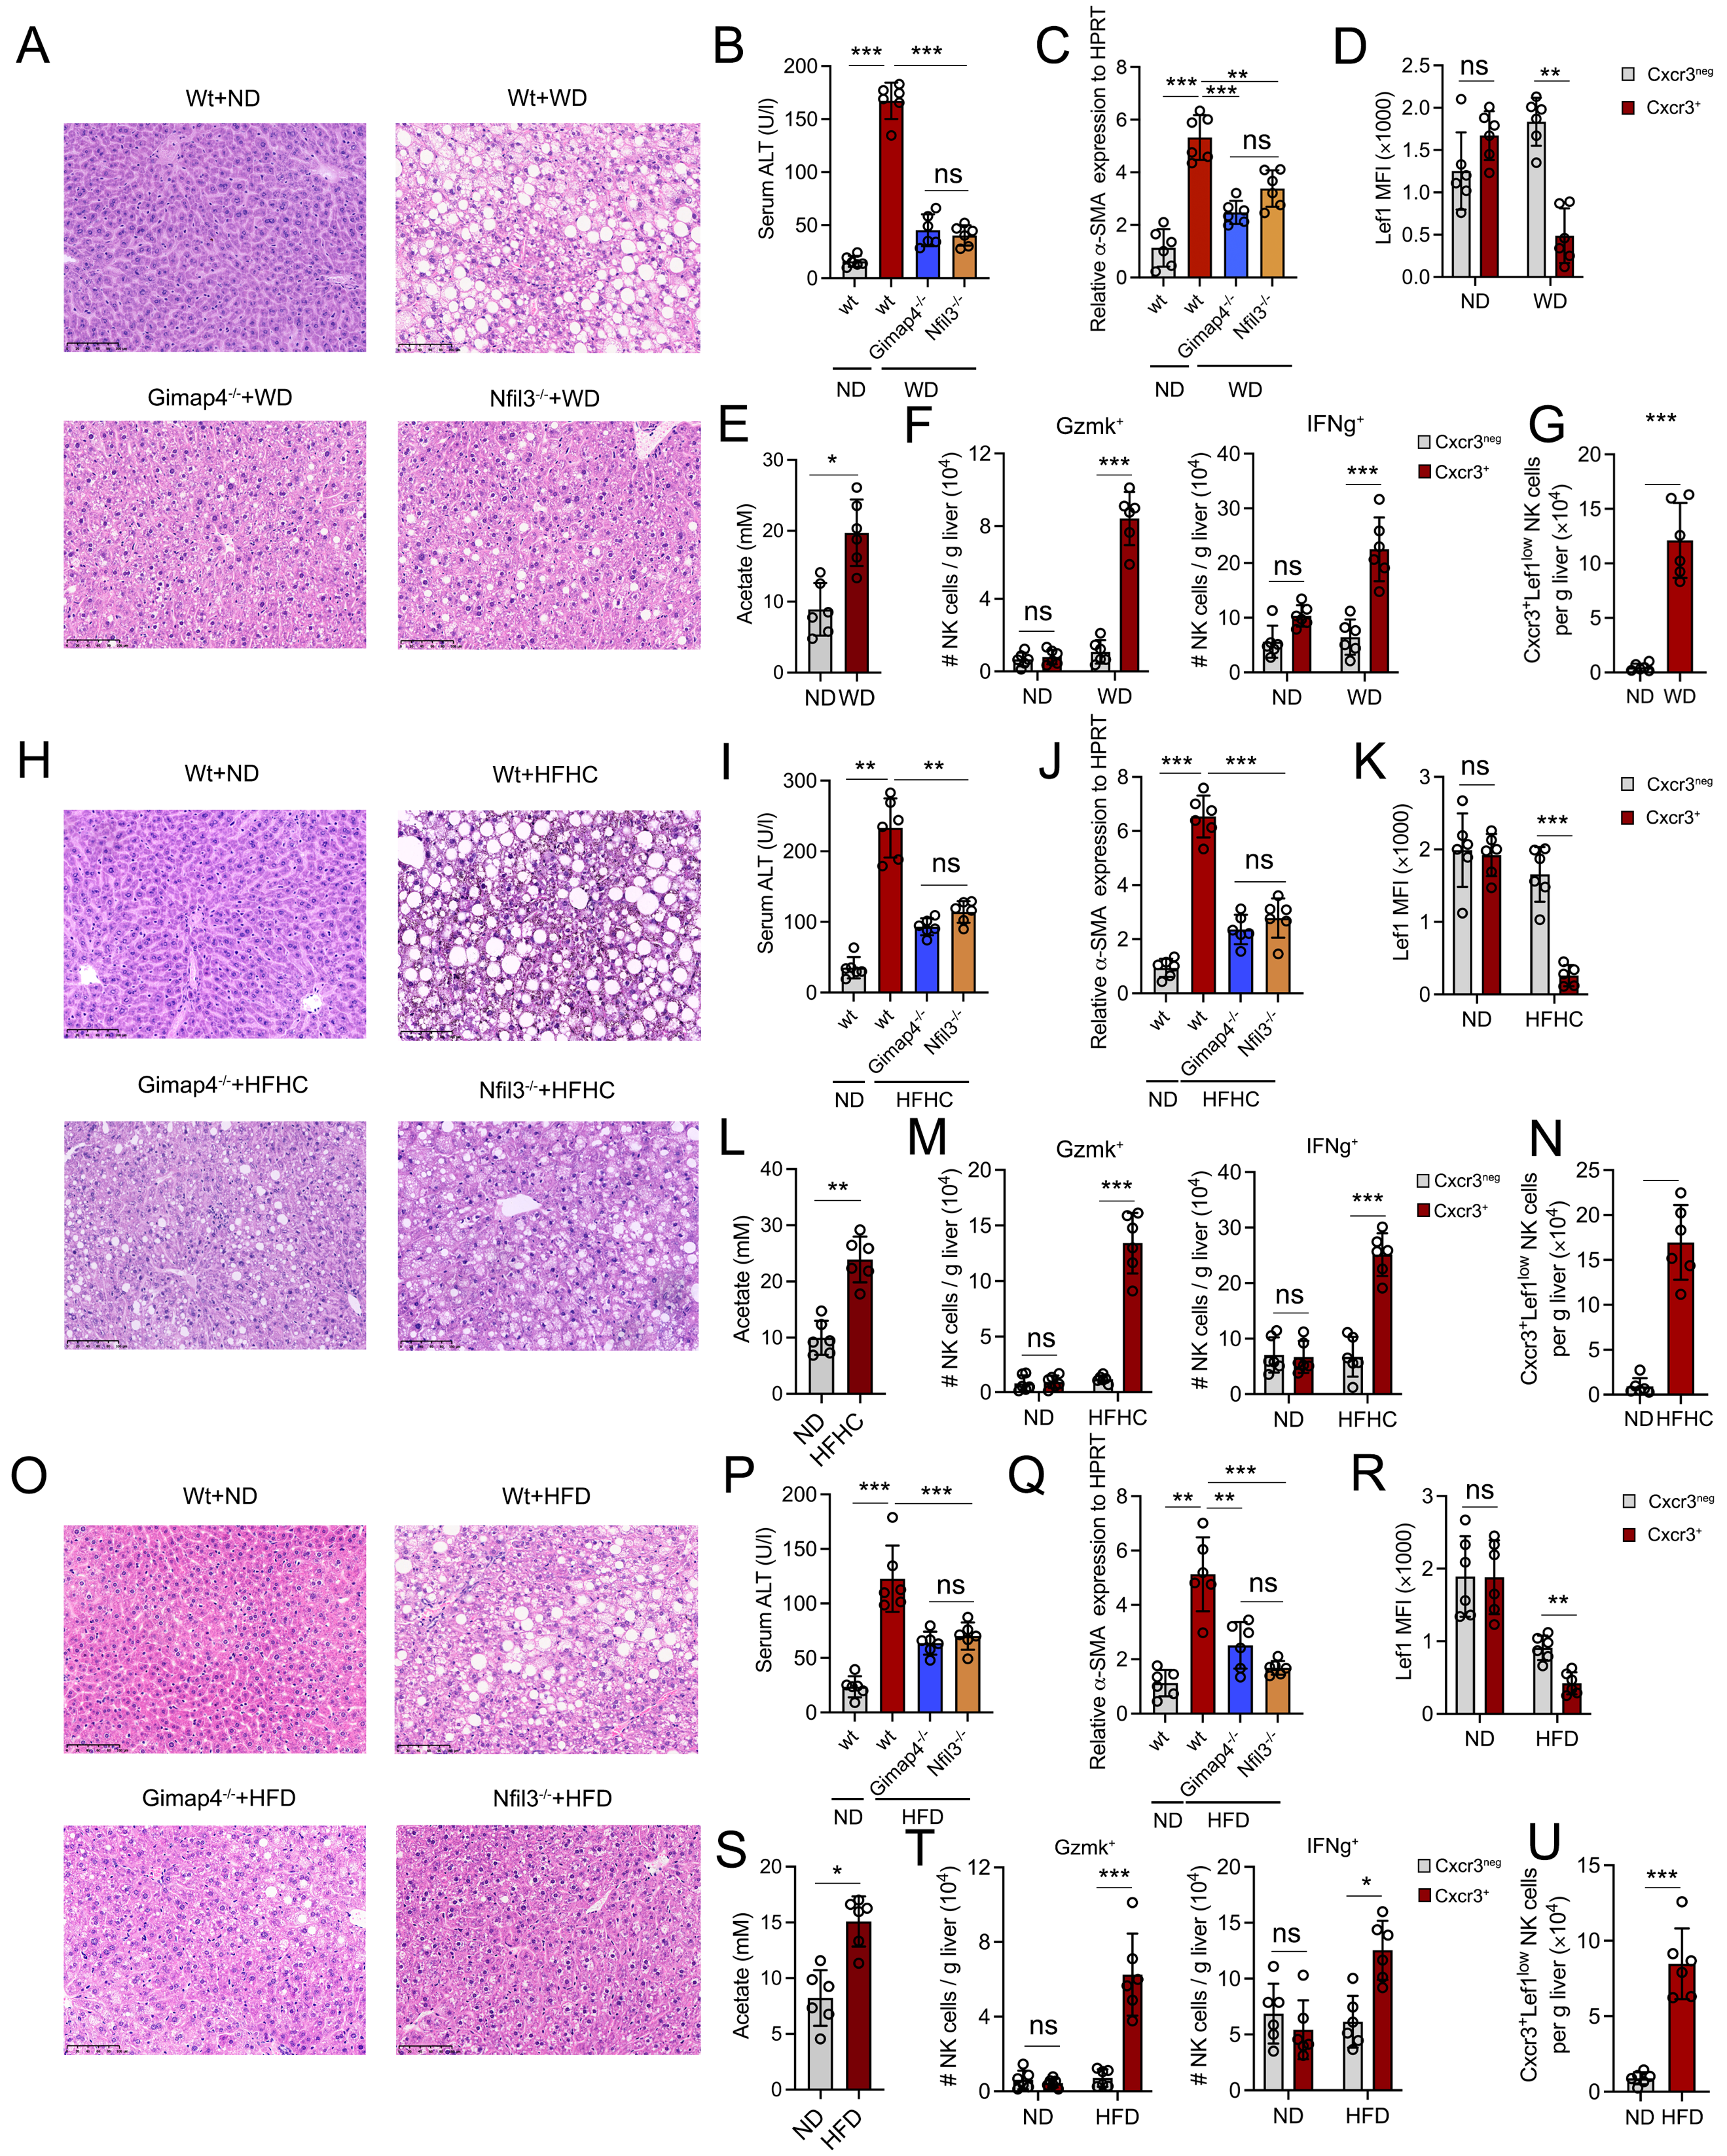
**

**Figure S3. Cxcr3+ Lef1low NK cells exhibit consistent functional mechanisms across WD diet-induced, HFHC diet-induced, and HFD diet-induced MASH models.**

**A**. Representative images of mice liver sections stained with H&E in the mice from the ND and WD groups. Scale bar, 100 μm. **B**. Serum ALT levels in healthy mice and MASH mice induced by WD diet. **C**. α-SMA expression levels in the liver tissue of healthy mice and WD diet-induced MASH mice. **D**. Lef1 expression quantified by flow cytometry in liver tissue of WD-induced MASH mouse liver. **E**. Acetate levels in liver tissue from healthy mice and MASH mice induced by WD diet, n=6. **F**. The number of GZMK-positive and IFN-γ-positive NK cells in mouse liver tissue of the ND and WD groups. **G**. Number of Cxcr3+Lef1lowNK cells in the liver tissue of healthy mice and WD diet-induced MASH mice, n=6. **H**. Representative images of mice liver sections stained with H&E in the mice from the ND and HFHC groups. Scale bar, 50 mm. **I**. Serum ALT levels in healthy mice and MASH mice induced by HFHC diet. **J**. α-SMA expression levels in the liver tissue of healthy mice and MASH mice induced by HFHC diet. **K**. Lef1 expression quantified by flow cytometry in liver tissue of HFHC-induced MASH mouse. **L**. Acetate levels in liver tissue from healthy mice and MASH mice induced by HFHC diet，n=6. **M**. The number of GZMK-positive and IFNγ-positive NK cells in the liver tissue of healthy mice and MASH mice induced by the HFHC diet. **N**. Number of Cxcr3+Lef1low NK cells in liver tissue of healthy mice and MASH mice induced by HFHC diet, n=6. **O**. Representative images of mice liver sections stained with H&E in the mice from the ND and HFD groups. Scale bar, 50 mm. **P**. Serum ALT levels in healthy mice and MASH mice induced by HFD. **Q**. α-SMA expression levels in the liver tissue of healthy mice and MASH mice induced by HFD. **R**. Lef1 expression quantified by flow cytometry in liver tissue of HFHC-induced MASH mouse. **L**. Acetate levels in liver tissue from healthy mice and MASH mice induced by HFD, n=6. **S**. Acetate levels in liver tissue from healthy mice and MASH mice induced by HFD，n=6. **T**. The number of GZMK-positive and IFNγ-positive NK cells in the liver tissue of healthy mice and MASH mice induced by the HFD. **U**. Number of Cxcr3+Lef1low NK cells in liver tissue of healthy mice and MASH mice induced by HFD, n=6. **P* < 0.05, ***P* < 0.01, ****P* < 0.001. One-way ANOVA with Tukey’s multiple comparison test (**B, C, I, J, P, Q**). two-way ANOVA with Tukey’s multiple comparison test (**D, F, K, M, R, T**). unpaired two-tailed t-test (**E, G, L, N, S, U**). All data are presented as mean ± SEM.


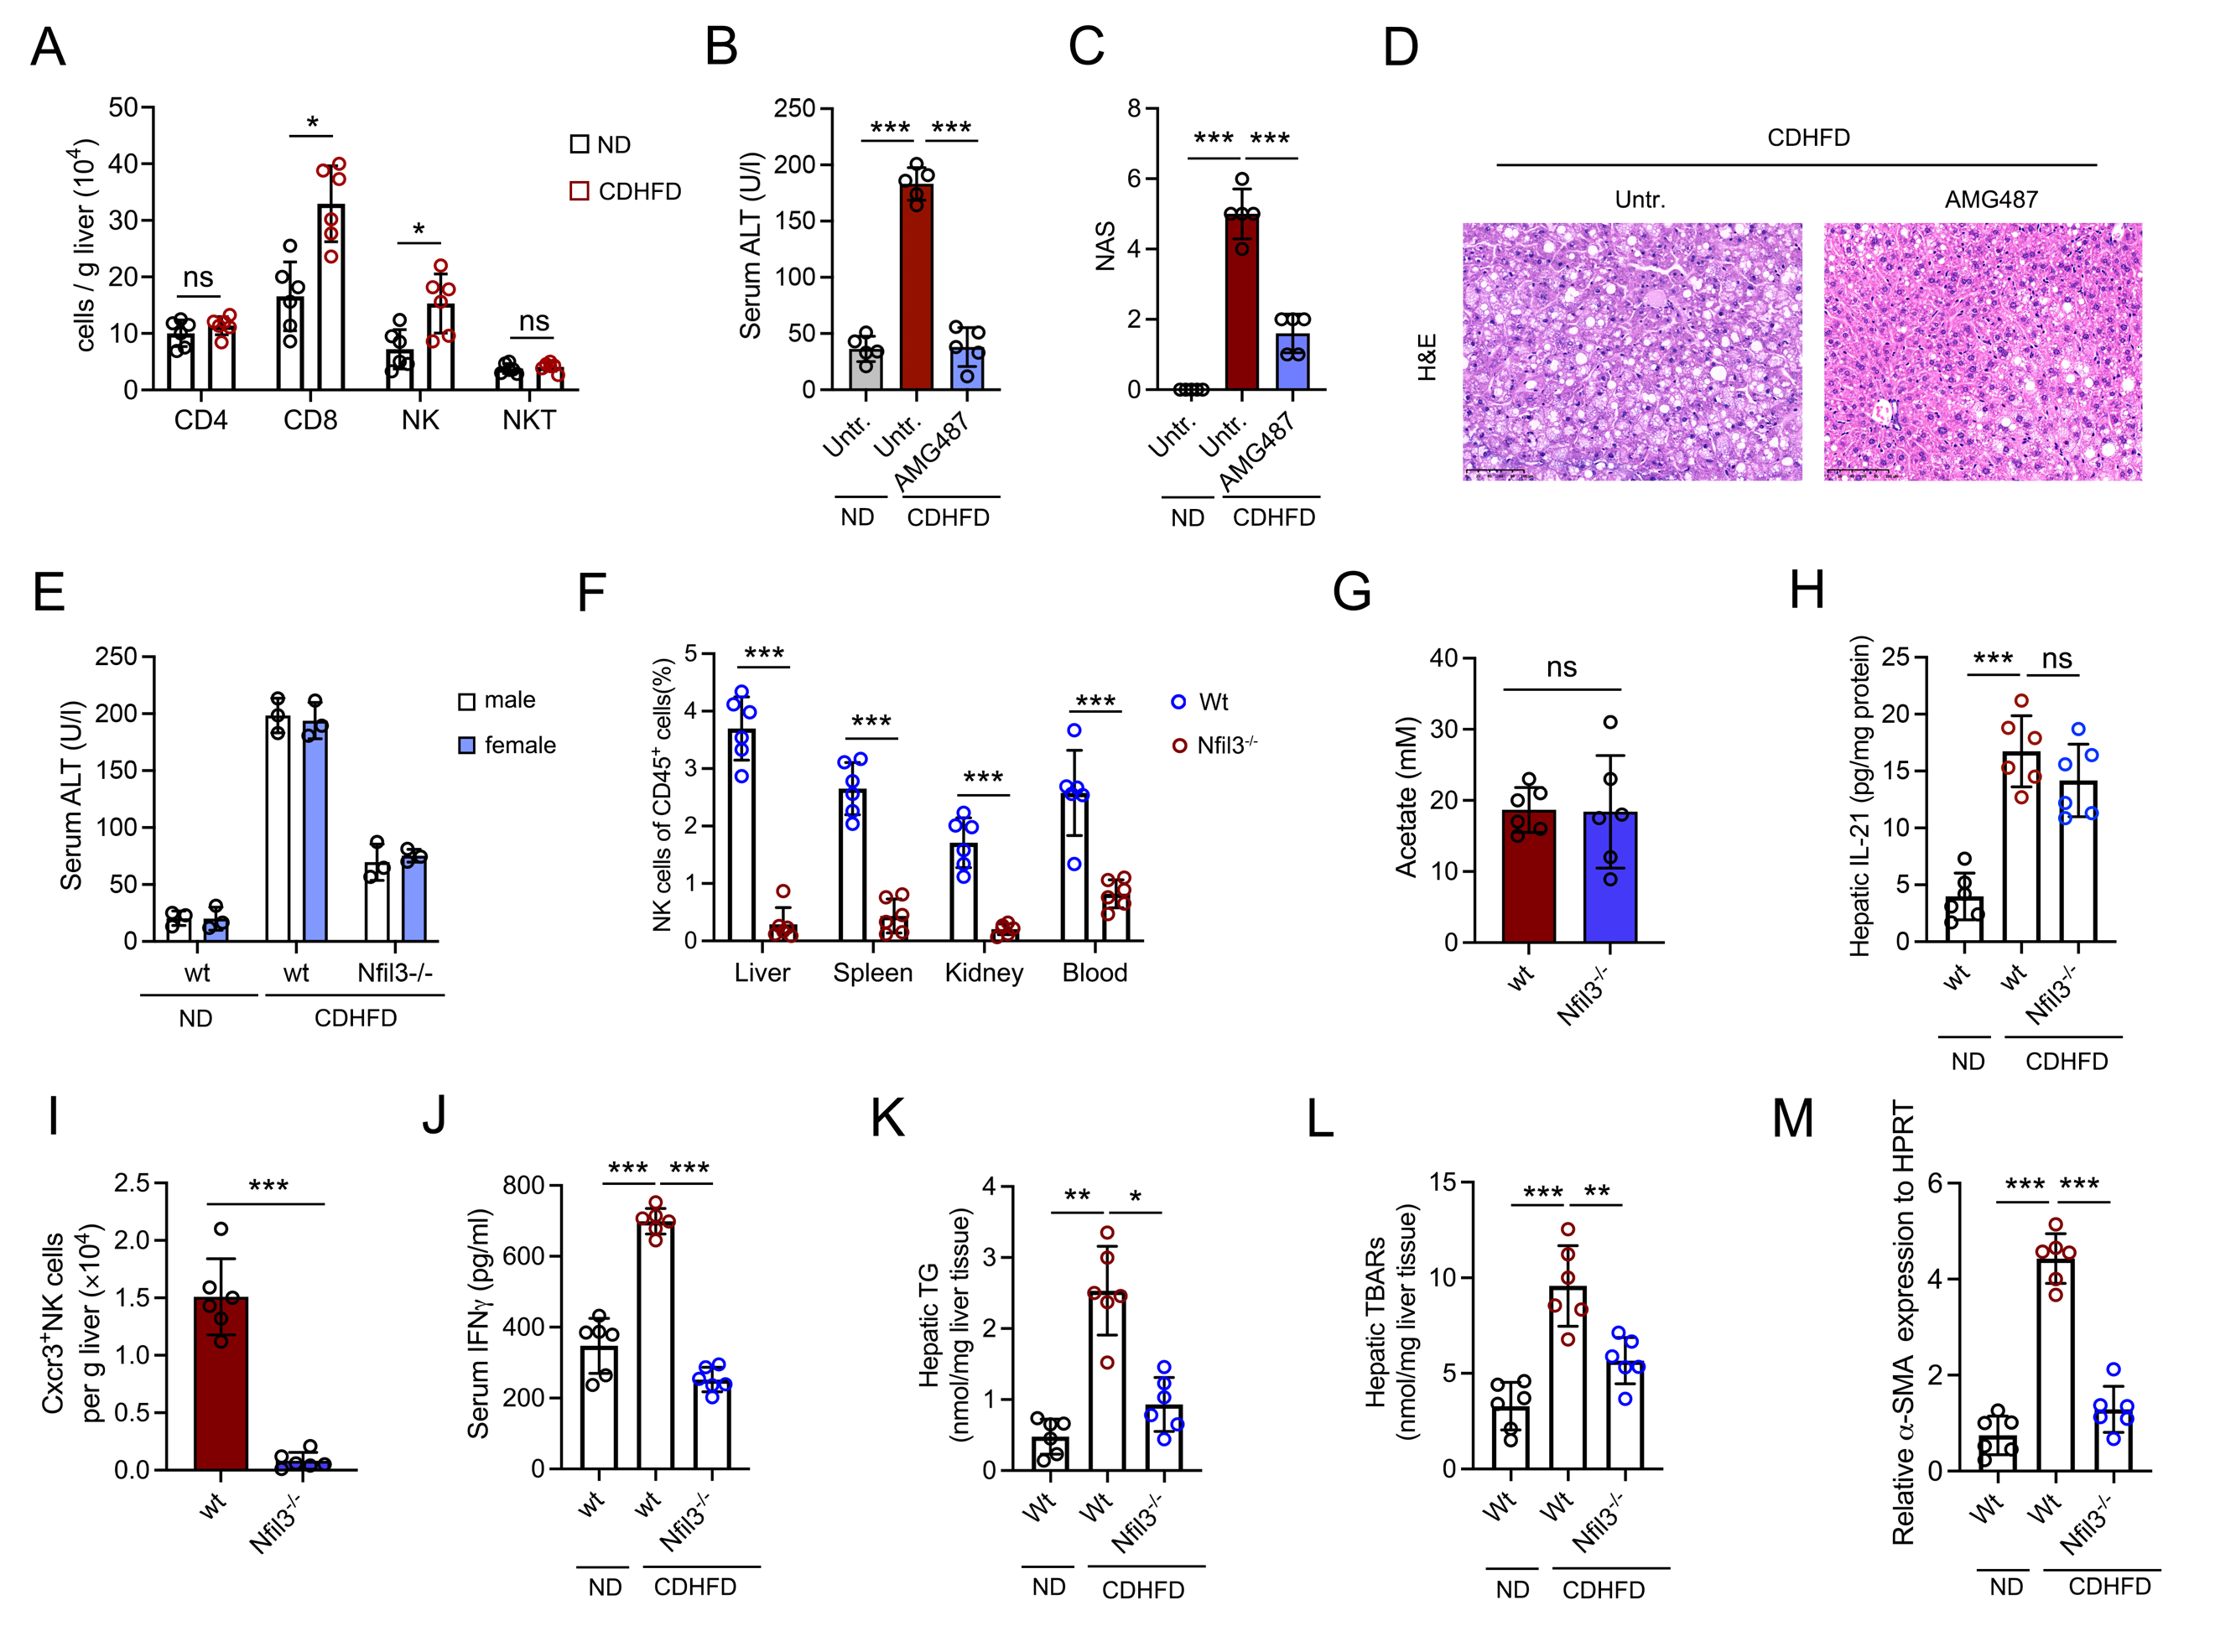
**Figure S4. Nfil3 knockout protects against CDHFD-induced MASH progression.**

**A**. Numbers of hepatic lymphocytes. **B-D**. sALT (**B**), NAS (**C**) and H&E histopathological staining（**D**）after AMG487 application (5 mg/kg per mouse/day, at 8 weeks) in mice fed a CDHFD, n = 6. **E**. Serum alanine aminotransferases (sALT) in Nfil3-/- mice (n = 6, male=3, female=3) compared to wild-type (wt) littermates (n = 6) after 8 months of feeding a CDHFD. **F**. NK cells of CD45+ cells (%) in liver, spleen, kidney and blood after 8 months of feeding a CDHFD. **G**. Acetate levels in the liver tissue of Nfil3-/- mice after 8 months of feeding a CDHFD. **H**. IL-21 levels in liver tissue of Nfil3-/- mice after 8 months of feeding a CDHFD. **I**. Number of Cxcr3+ NK cells in the liver tissue of Nfil3-/- mice. **J**. Serum IFN-γ levels. **K-M**. Liver TG levels, TBARs levels, and SMA expression levels in Nfil3-/- mice liver tissue compared to wild-type (wt) littermates after 8 months of feeding a CD-HFD, n = 6. **P* < 0.05, ***P* < 0.01, ****P* < 0.001. One-way ANOVA with Tukey’s multiple comparison test (**B-C, E, H, J-M**). Two-way ANOVA with Sidak’s (**A, F**). unpaired two-tailed t-test (**G, I)**. All data are presented as mean ± SEM.


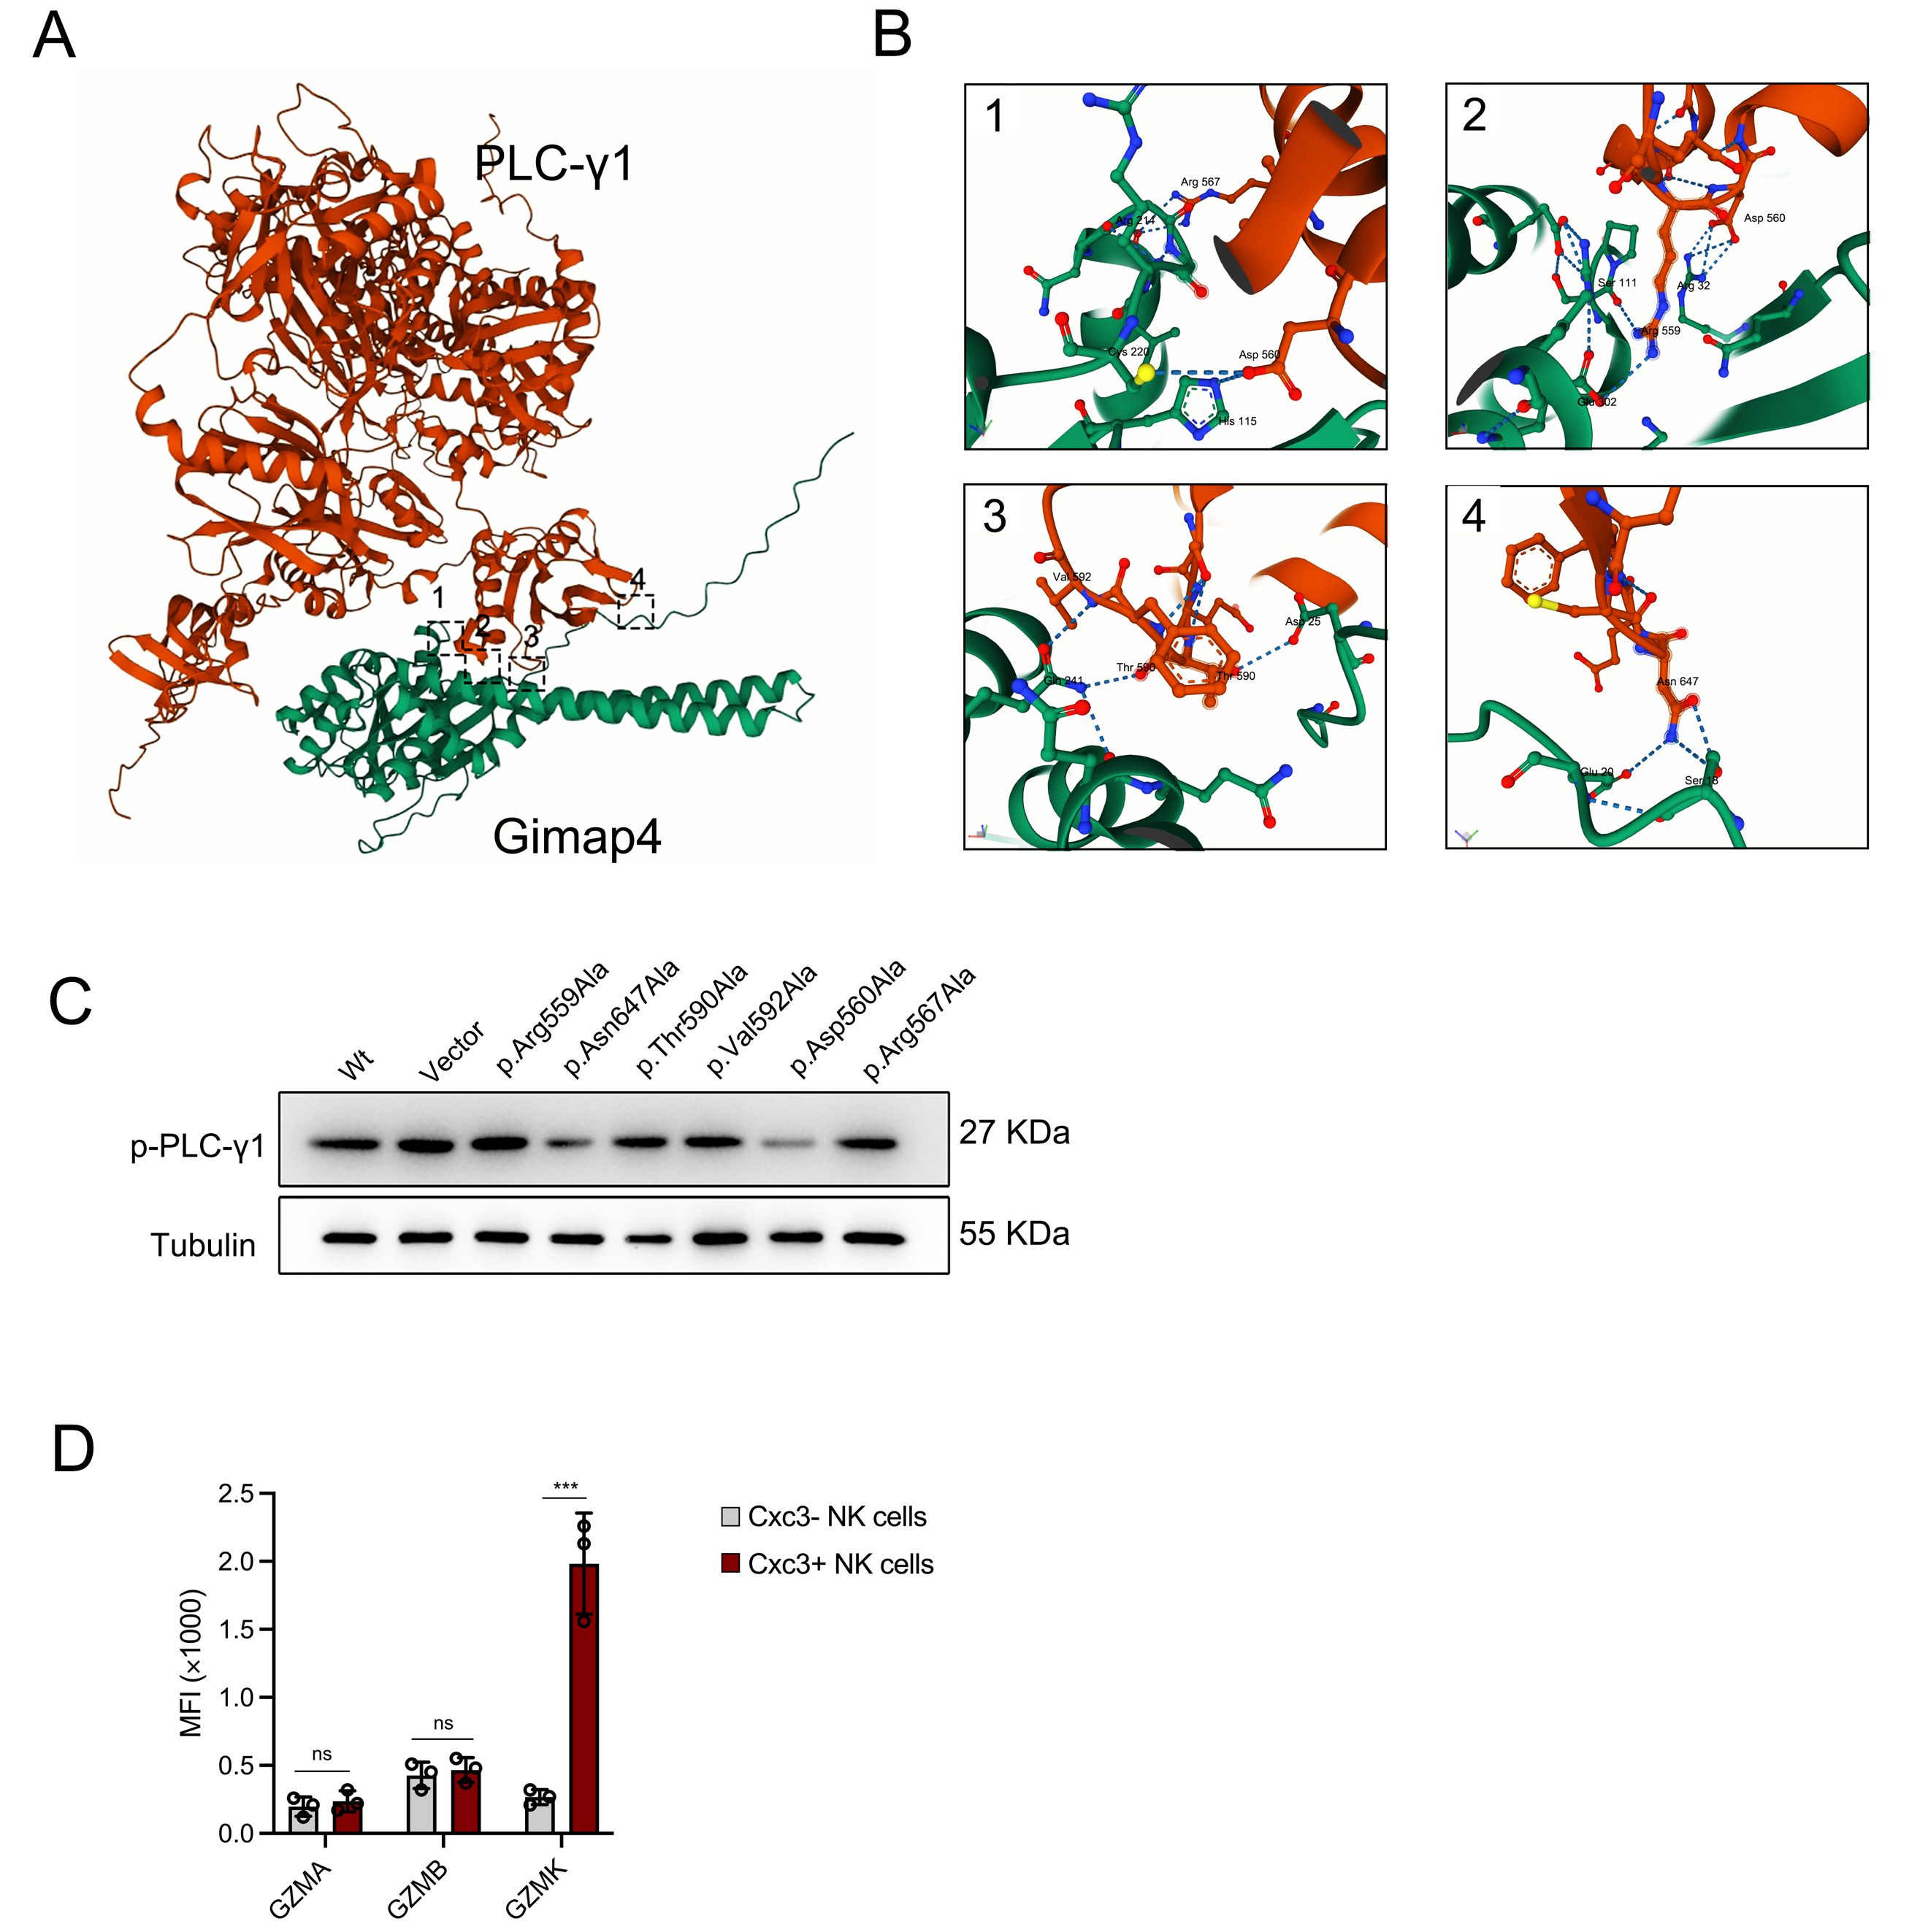


**Figure S5: Gimap4 directly interacts with PLC-γ1.**

A-B. AlphaFold 3 predicts the binding sites between Gimap4 and PLC-γ1. C. Point mutation of Gimap4 validates the key sites mediating PLC-γ1 phosphorylation by Gimap4. D. Levels of GZMA, GZMB, and GZMK in Cxcr3+ NK cells and Cxcr3- NK cells from MASH mice, n=3.**P* < 0.05, ***P* < 0.01, ****P* < 0.001. unpaired two-tailed t-test (**D**). All data are presented as mean ± SEM.


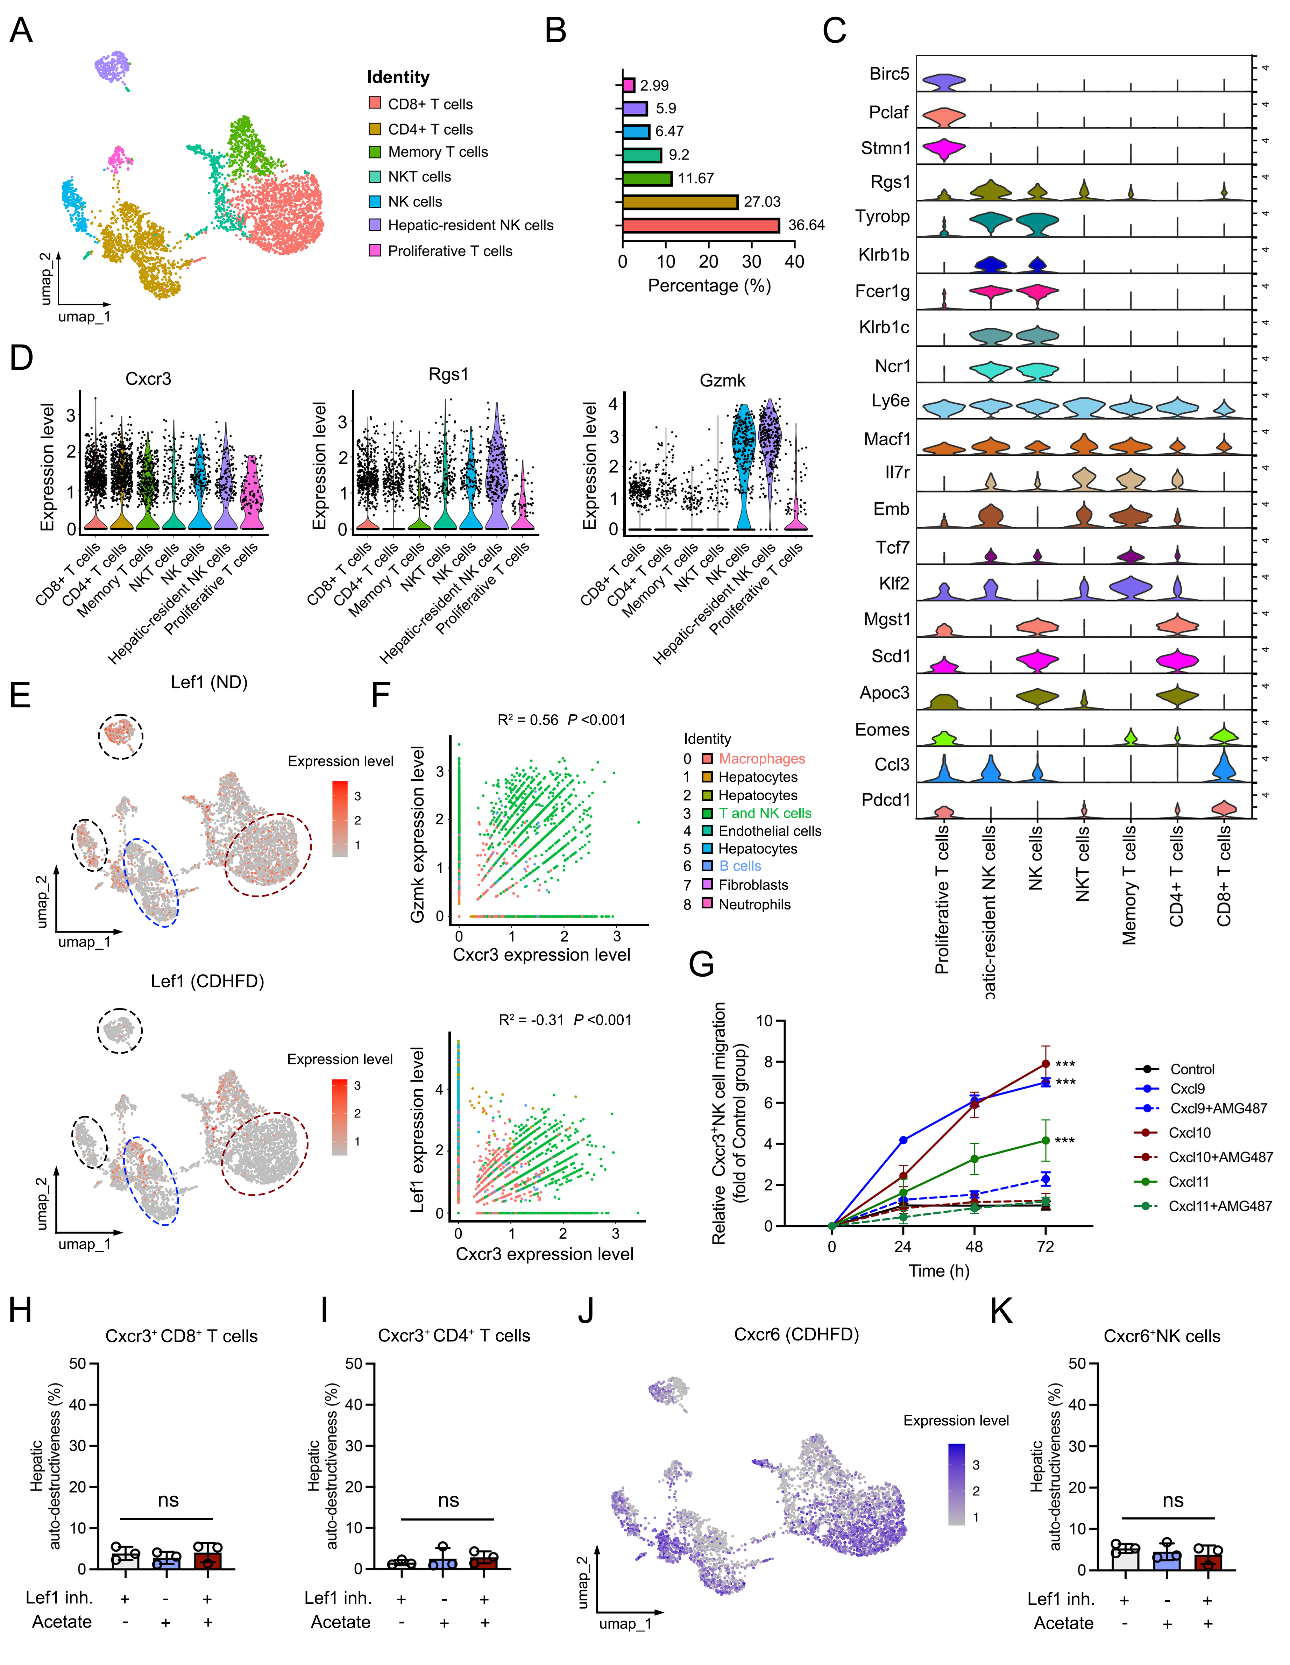
**Figure S6. Reclustering of T/ NK cell subsets.**

**A**. Phenograph-based analysis of liver tissue T/NK cell populations. umap, uniform manifold approximation and projection. B. After re-clustering, the percentage of each cell group. C. Stacked violin plot of marker gene expression (Top 3) for each cell cluster. **D**. Expression of Cxcr3, Rgs1, and Gzmk across cell populations. **E**. Umap plot of cell clusters and expression levels of Lef1 in the ND and CDHFD groups. **F**. Correlation analysis of the expression levels of Gzmk and Lef1 in single cells with the expression level of Cxcr3. **G**. Transwell assay analysis of the induction of Cxcr3+ NK cell migration by Cxcl9, Cxcl10, and Cxcl11. **H-I**. Cxcr3+ CD8+ T cells and Cxcr3+ CD4+ T cells auto-destructiveness activity on primary hepatocytes after treatment with Lef1 degrading agent and stimulation with acetate. **J**. Umap diagram showing the cell population expressing Cxcr6 and expression levels in the CDHFD group. **K**. Cxcr6+ NK cells exhibit auto-destructive activity against primary hepatocytes after treatment with Lef1 inhibitors and stimulation with acetate. ns, no significance. one-way ANOVA with Tukey’s multiple comparison test (H-I, K). All data are presented as mean ± SEM.


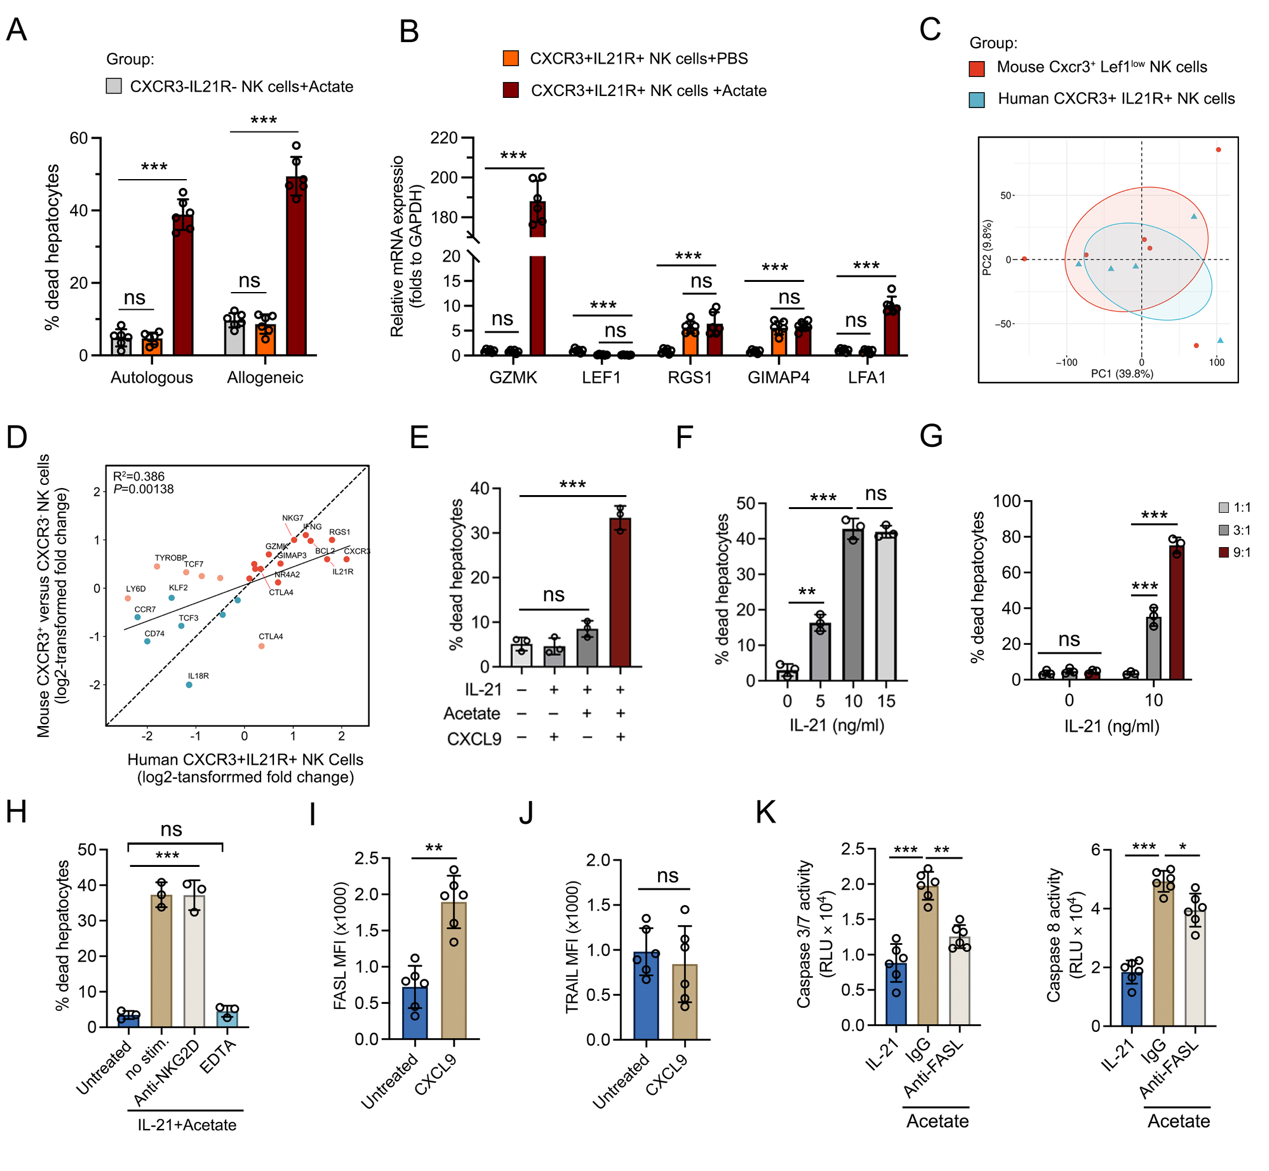


**Figure S7. Human CXCR3+ IL21R+NK cells employ a similar auto-destructive mechanism.**

**A.** Auto-destructive activity against primary human hepatocytes by allogeneic or autologous NK cells following IL-21 and acetate incubation (E:T ratio=3:1). **B**. Signature gene expression in IL-21-stimulated hepatic CXCR3⁺IL21R⁺ NK cells from MASH patients. **C**. PCA of transcriptional signatures in Cxcr3⁺Lef1low NK cells versus human CXCR3⁺IL21R⁺ NK cells. **D**. Transcriptomic concordance between mouse (CXCR3⁺ vs. CXCR3⁻ NK cells in MASH) and human (hepatic CXCR3⁺IL21R⁺ NK cells in MASH) was assessed by Spearman’s correlation, showing the linear regression (solid line) and 95% confidence interval (grey area). **E**. Cytotoxicity of IL21R⁺ NK cells from healthy donors against primary human hepatocytes. F. Effects of variable IL-21 concentrations on IL21R+ NK cell cytotoxicity, n=3. **G**. Effect of different effector-to-target ratios on the cytotoxic activity of IL21R+ NK cells, n=3. **H**. Auto-destructiveness of IL-21-treated CXCR3⁺ NK cells against human hepatocytes were assessed under the following with or without acetate and in the presence of 10 μg/ml anti-NKG2D antibodies or 20 mM EDTA, n=3. **I-J.** CXCL9 stimulates NK cell FASL and TRAIL expression, n=6. **K**. Caspase3/7 and Caspase8 activation in human primary hepatocytes after treating with anti-FasL (10 μg/ml), n = 3. Data are presented as mean ± SEM. **P* < 0.05, ***P* < 0.01, ****P* < 0.001. Statistical analyses were performed using one-way ANOVA with Tukey’s test (E-F, H, K), two-way ANOVA with Tukey’s test (A-B, G), or unpaired two-tailed t-test (I-J).

**STAR * METHODS**

**KEY RESOURCES TABLE**

| REAGENT or RESOURCE | SOURCE | IDENTIFIER |
| --- | --- | --- |
| **Antibodies for flow cytometric analysis** | | |
| FITC anti-human/mouse Cd45 | Abcam | Cat# ab27287 |
| BV421 anti-mouse Cxcr3 | BioLegend | Cat# 149023 |
| PE anti-Cxcr3 | BioLegend | Cat# 100206 |
| APC Anti-mouse Cd49b | BioLegend | Cat# 108910 |
| FITC Anti-CD3ε | BioLegend | Cat# 100306 |
| PE Anti-mouse Gzmk | Thermo Fisher | Cat# 50-5897-82 |
| PerCP-Cy5.5 Anti-mouse IFNg | BD Biosciences | Cat# 560699 |
| PerCP-Cy5.5 Anti-mouse Tnf-α | BioLegend | Cat# 506324 |
| Alexa Fluor® 647 Anti-mouse Ki67 | BioLegend | Cat# 652410 |
| PerCP-Cy5.5 Anti-mouse Bcl2 | BD Biosciences | Cat# 562499 |
| Anti-mouse Lef1 | Abcam | Cat# ab137872 |
| BV510 Anti-mouse Il21R | BioLegend | Cat# 135017 |
| Alexa Fluor® 488 Anti-mouse ICAM1 | Abcam | Cat# ab2210 |
| PE Anti-LFA1 | Abcam | Cat# ab33477 |
| Anti-human FASL | BioLegend | Cat# 110406 |
| Anti-human TRAIL | BioLegend | Cat# 308806 |
| **Blocking Antibody and Neutralizing Antibody** | | |
| Anti-CD122 (TM-β1) | BioXcell | Cat# BE0311 |
| Anti-LFA1 (M17/4) | BioXcell | Cat# BE0024 |
| Anti-MHC 1 H-2Kᵇ (AF6-88.5.5.3) | BioXcell | Cat# BE0121 |
| Anti-Nkg2d (CX5) | BioXcell | Cat# BE0308 |
| Anti-Nkp30 (29B1.4) | BioXcell | Cat# BE0279 |
| Human Anti-NKG2D (149810) | BioXcell | Cat# BE0314 |
| Human Anti-FASL (NOK-1) | BioXcell | Cat# BE0307 |
| Anti-TβRII (TR1) | BioXcell | Cat# BE0057 |
| Anti-Tnfr1 (XT3.11) | BioXcell | Cat# BE0061 |
| Anti-Tgf-β1 (1D11) | BioXcell | Cat# BE0057 |
| Anti-Ifnγ1 (XMG1.2) | BioXcell | Cat# BE0055 |
| IgG1 | BioXcell | Cat# BE0088 |
| **Antibodies for Western Blot analysis** | | |
| anti-c-Myc (9E10)-HRP antibody | Sigma-Aldrich | Cat# M4439 |
| anti-Flag® M2-HRP antibody | Sigma-Aldrich | Cat# A8592 |
| Anti-p-PLCγ1 (Tyr783) | Cell Signaling Technology | Cat# 14008 |
| Anti-PLCγ1 | Cell Signaling Technology | Cat# 10607 |
| Anti-Gimap4 | Thermo Fisher Scientific | Cat# MA5-25993 |
| Anti-JAK2 | Abcam | Cat# ab108596 |
| Anti-p-JAK2 (Tyr1007/1008) | APExBIO | Cat# MA4436 |
| Anti-STAT1 | Proteintech | Cat# 10144-2-AP |
| Anti-p-STAT1 (Tyr701) | Proteintech | Cat# 66418-1-Ig |
| Anti-JAK1 | Proteintech | Cat# 66636-1-Ig |
| Anti-IRF4 | Proteintech | Cat# 11335-1-AP |
| Anti-β-ACTIN | Proteintech | Cat# 60008-1-Ig |

| REAGENT or RESOURCE | SOURCE | IDENTIFIER |
| --- | --- | --- |
| **Bacterial and virus strains** | | |
| pNK-GFP | GeneChem | N/A |
| pNK-Lef1-GFP | This paper | N/A |
| pLKO.1-TRC | Addgene | Addgene #10878 |
| pMDLg/pRRE | Addgene | Addgene #12251 |
| pRSV-Rev | Addgene | Addgene #12253 |
| pMD2.G | Addgene | Addgene #12259 |
| pcDNA3.1-Gimap4-Flag | This paper | N/A |
| pcDNA3.1-PLCγ1-Myc | This paper | N/A |
| **Chemicals, peptides, and recombinant proteins** | | |
| Percoll | Cytiva | Cat# 17089101 |
| TRIzol RNA isolation reagent | Invitrogen | Cat# 15596018 |
| Antibody Dilution Buffer | Beyotime | Cat# P0023A |
| RIPA buffer | ThermoFisher | Cat# 89900 |
| eFluor™ 514 Calcium Sensor Dye | ThermoFisher | Cat# 65-0859-39 |
| Lipofectamine 3000 | **Invitrogen** | Cat# **L3000015** |
| DAPI | Beyotime | Cat# P0131 |
| H&E staining kit | Beyotime | Cat# C0105M |
| Masson staining kit | Solarbio | Cat# G1340 |
| Triglyceride assay kit | Nanjing Jiancheng | Cat# A110-1-1 |
| Acetate assay kit | Merck | Cat# MAK086 |
| Alanine Aminotransferase (ALT) Activity Kit | ThermoFisher | Cat# MAK052 |
| Mouse IL-21 Quantikine ELISA Kit | R&D Systems | Cat# DY594 |
| Mouse CXCL9 Quantikine ELISA Kit | R&D Systems | Cat# MM900 |
| Human IL-21 ELISA Kit | Thermo Fisher Scientific | Cat# BMS221 |
| NK Cell Isolation Kit | Miltenyi Biotec | Cat# 130-115-818 |
| Fumaric acid | Merck | Cat# F8506 |
| Citrate | Merck | Cat# C7254 |
| Acetate | Merck | Cat# S2889 |
| Propionate | Merck | Cat# P880 |
| Pyruvate | Merck | Cat# P2256 |
| Palmitic acid | Merck | Cat# P0500 |
| Butyrate | Merck | Cat# B5887 |
| Oleic acid | Merck | Cat# O1008 |
| Lactate | Merck | Cat# L4263 |
| Cyclosporine A | Merck | Cat# 30024 |
| EGTA | Merck | Cat# E4378 |
| Wortmannin | Merck | Cat# W1628 |
| UO126 | Merck | Cat# U0106 |
| Edelfosine | Merck | Cat# E0165 |
| CXCL9 | R&D Systems | Cat# 492-MG-010 |
| CXCL10 | R&D Systems | Cat# 466-MI-010 |
| CXCL11 | Sino Biological | Cat# 50743-M08H |
| LPS | Sigma-Aldrich | Cat# L4516 |
| Poly(I:C) | InvivoGen | Cat# tlrl-pic |
| CpG | InvivoGen | Cat# tlrl-1826-1 |
| Adenosine | Merck | Cat# A9251 |
| ATP | Sigma-Aldrich | Cat# FLAAS-1KT |
| NAD+ | Sigma-Aldrich | Cat# N7004 |
| MICA-FC | R&D Systems | Cat# 1308-MC-050 |
| IL-2 | R&D Systems | Cat# 402-ML-020 |
| IL-15 | ThermoFisher | Cat# **PMC2155** |
| IL-21 | ThermoFisher | Cat# PMC0214 |
| TGF-β1 | PeproTech | Cat# 100-21 |
| IL-17 | ThermoFisher | Cat# PMC0175 |
| IL-1β | ThermoFisher | Cat# 14-7012-80 |
| IL-7 | ThermoFisher | Cat# PMC0075 |
| IFN-γ | ThermoFisher | Cat# PMC4033 |
| TNF-α | ThermoFisher | Cat# PMC3014 |
| **Experimental models: Organisms/strains** | | |
| WT C57BL/6J | GemPharmatech | Cat# C001171 |
| Gimap4-knockout C57BL/6J mice | Cyagen Biosciences | N/A |
| Irf4-knockout C57BL/6J mice | Cyagen Biosciences | N/A |
| **Research diet** | | |
| ND diet | Research Diets | Cat# D12450J |
| CDHFD diet | Research Diets | Cat# D05010402 |
| HFHC diet | Research Diets | Cat# D09100301 |
| WD diet | Research Diets | Cat# D12079B |
| HFD diet | Research Diets | Cat# D12492 |
| **Software and algorithms** | | |
| ImageJ | NIH | https://imagej.nih.gov/ij/ |
| Prism 10 | GraphPad | https://www.graphpad.com/ |
| FlowJo | FlowJo | N/A |
| R version 5.0.5 | R software | https://www.r-project.org/ |
