# Supplementary material for: CXCR3+ LEF1low NK cells cause immunopathological hepatic damage in MASH
Source: Research Square preprint supplement (doi:10.21203/rs.3.rs-8654560/v1), 2026-02-11
Supplement: Supplementary file 3 [file 860b375cdf6527cb39544df8.xlsx]

## Sheet: 工作表 1
表格 1
Gene Symbol	Forward Primer	Reverse Primer
Mouse-a-SMA	CCCAGACATCAGGGAGTAATGG	TCTATCGGATACTTCAGCGTCA
Mouse-Tnf	CAGGCGGTGCCTATGTCTC	CGATCACCCCGAAGTTCAGTAG
Mouse-Tgfb1	CCACCTGCAAGACCATCGAC	CTGGCGAGCCTTAGTTTGGAC
Mouse-Gzmk	TGGCTGGCGTTTATATGTCTTC	TCTGGGAAACCAAGAGTAGCA
Mouse-Gimap4	CGGGGTTCATCCCAGAAAGTT	CCCCAAGGATACTGTTCCCTG
Mouse-Cxcl9	GGAGTTCGAGGAACCCTAGTG	GGGATTTGTAGTGGATCGTGC
Mouse-Cxcr3	GGTTAGTGAACGTCAAGTGCT	CCCCATAATCGTAGGGAGAGGT
Human-GZMK	GGGGCTTATATGACTCATGTGTG	GTGGATCAATCAGAACACCTCC
Human-LEF1	AGAACACCCCGATGACGGA	GGCATCATTATGTACCCGGAAT
Human-RGS1	TCTTCTCTGCTAACCCAAAGGA	TGCTTTACAGGGCAAAAGATCAG
Human-GIMAP4	GCCCAATACGGCAGTATGAG	CCTGCTCCGGTTTTACCCAC
Human-ITGAL	TGCTTATCATCATCACGGATGG	CTCTCCTTGGTCTGAAAATGCT
Human-CXCR3	CCACCTAGCTGTAGCAGACAC	AGGGCTCCTGCGTAGAAGTT
Human-CXCL9	CCAGTAGTGAGAAAGGGTCGC	AGGGCTTGGGGCAAATTGTT
Human-IL21	TAGAGACAAACTGTGAGTGGTCA	GGGCATGTTAGTCTGTGTTTCTG
