# Supplementary material for: CXCR3+ LEF1low NK cells cause immunopathological hepatic damage in MASH
Source: Research Square preprint supplement (doi:10.21203/rs.3.rs-8654560/v1), 2026-02-11
Supplement: Supplementary file 4 [file 90c74482b054a9ffb0f67286.xlsx]

## Sheet: Cxcl9+HECs_vs_Scd1+HECs
gene_id	Fold change	log2FoldChange	pvalue	padj	Regulation	Scd1+HECs(mean)	Cxcl9+HECs(mean)	Scd1+HECs_1	Scd1+HECs_2	Scd1+HECs_3	Scd1+HECs_4	Cxcl9+HECs_1	Cxcl9+HECs_2	Cxcl9+HECs_3	Cxcl9+HECs_4	Cxcl9+HECs_5	Cxcl9+HECs_6
DDX11L1	1.08961	0.12381	0.786719	0.999062	up	10.7506	9.54606	5.0645	9.9104	13.4698	14.5576	8.08334	11.6872	8.53203	10.0479	10.8426	8.08334
WASH7P	1.11432	0.156162	0.262038	0.999062	up	629.676	565.338	740.141	613.682	576.752	588.128	539.274	560.299	494.858	653.112	605.212	539.274
MIR6859-3	1	0	1	1	up	0	0	0	0	0	0	0	0	0	0	0	0
MIR6859-2	1	0	1	1	up	0	0	0	0	0	0	0	0	0	0	0	0
MIR6859-1	1	0	1	1	up	0	0	0	0	0	0	0	0	0	0	0	0
MIR6859-4	1	0	1	1	up	0	0	0	0	0	0	0	0	0	0	0	0
MIR1302-2	1	0	1	1	up	0	0	0	0	0	0	0	0	0	0	0	0
MIR1302-11	1	0	1	1	up	0	0	0	0	0	0	0	0	0	0	0	0
MIR1302-9	1	0	1	1	up	0	0	0	0	0	0	0	0	0	0	0	0
MIR1302-10	1	0	1	1	up	0	0	0	0	0	0	0	0	0	0	0	0
FAM138A	1	0	1	1	up	0	0	0	0	0	0	0	0	0	0	0	0
FAM138C	1	0	1	1	up	0	0	0	0	0	0	0	0	0	0	0	0
FAM138F	1	0	1	1	up	0	0	0	0	0	0	0	0	0	0	0	0
OR4F5	1.39691	0.482236	0.881169	1	up	0.306132	0	0	0	1.22453	0	0	0	0	0	0	0
LOC729737	1.25574	0.328542	0.489141	0.999062	up	54574.1	43459.5	57952.4	47596.6	31526.7	81220.9	16277.5	47261.8	58953.5	30410.5	91576.3	16277.5
FAM138D	-1.11179	-0.152879	0.755797	0.999062	down	11.0408	12.0967	10.129	3.81169	14.6943	15.5281	8.08334	10.3123	17.0641	12.2807	16.7567	8.08334
OR4F29	1	0	1	1	up	0	0	0	0	0	0	0	0	0	0	0	0
OR4F3	1	0	1	1	up	0	0	0	0	0	0	0	0	0	0	0	0
OR4F16	1	0	1	1	up	0	0	0	0	0	0	0	0	0	0	0	0
LOC100132287	1	0	1	1	up	0	0	0	0	0	0	0	0	0	0	0	0
LOC100132062	1	0	1	1	up	0	0	0	0	0	0	0	0	0	0	0	0
LOC101928626	1	0	1	1	up	0	0	0	0	0	0	0	0	0	0	0	0
MIR6723	1.1182	0.161174	0.555328	0.999062	up	3095.12	2767.76	3210.17	4411.65	2686.61	2072.04	2672.12	4343.52	2188.47	2685.02	2045.3	2672.12
LOC100133331	1.22913	0.29764	0.533983	0.999062	up	23542.7	19153.9	24554.9	20338.4	13327.7	35949.6	7307.34	20046.3	27193	12792.1	40277.2	7307.34
LOC100288069	1.06478	0.0905545	0.81552	0.999062	up	7680.54	7213.28	6575.89	7049.34	4376.46	12720.5	4724.13	7259.83	9203.22	4120.75	13247.6	4724.13
FAM87B	1.41401	0.499794	0.389415	0.999062	up	9.7697	7.05934	10.129	11.4351	4.8981	12.6166	2.30953	6.87484	12.798	11.1643	6.89981	2.30953
LINC00115	-1.27874	-0.354722	0.297951	0.999062	down	28.3687	35.8202	21.705	24.3948	44.0829	23.2922	32.3334	39.8741	42.6602	48.0065	19.7138	32.3334
LINC01128	-1.00508	-0.00731296	0.983353	0.999062	down	94.5374	94.7893	79.585	134.934	115.105	48.5254	93.5358	138.872	79.6323	113.876	49.2844	93.5358
FAM41C	1.28318	0.359722	0.373134	0.999062	up	518.756	404.233	350.174	312.559	412.665	999.624	284.072	278.431	511.922	331.58	735.323	284.072
LOC100130417	1	0	1	1	up	0	0	0	0	0	0	0	0	0	0	0	0
SAMD11	-1.64717	-0.719993	0.823388	1	down	0	0.164281	0	0	0	0	0	0	0	0	0.985688	0
NOC2L	1.09514	0.131116	0.673754	0.999062	up	141.624	129.029	153.382	169.239	160.413	83.4637	145.5	173.933	69.6783	151.835	87.7262	145.5
KLHL17	1.10836	0.148428	0.717661	0.999062	up	48.7594	43.7631	59.327	64.0364	36.7358	34.9383	31.1786	77.6857	18.4861	63.6365	40.4132	31.1786
PLEKHN1	1.34051	0.422779	0.72675	1	up	2.28693	1.59556	2.1705	3.81169	1.22453	1.94102	0	5.49987	0	1.11643	2.95706	0
PERM1	-3.26997	-1.70928	0.34352	1	down	0.37146	1.43301	0.7235	0.762338	0	0	0	1.37497	4.26602	0	2.95706	0
HES4	1.06388	0.0893381	0.877542	0.999062	up	204.883	192.318	245.99	166.19	232.66	174.692	92.381	276.369	19.9081	367.306	305.563	92.381
ISG15	2.18122	1.12514	0.0130523	0.286716	up	1876.55	860.105	1549.01	1713.74	3431.12	812.316	737.893	825.668	395.317	1882.3	581.556	737.893
AGRN	1.03707	0.0525119	0.915132	0.999062	up	89.3181	85.8033	77.4145	77.7585	155.515	46.5844	85.4525	91.4354	24.1741	181.978	46.3273	85.4525
RNF223	1	0	1	1	up	0	0	0	0	0	0	0	0	0	0	0	0
C1orf159	1.23706	0.306918	0.44531	0.999062	up	57.5347	46.5723	83.2025	73.1845	51.4301	22.3217	55.4286	59.1236	27.0181	55.8215	26.6136	55.4286
LINC01342	1	0	1	1	up	0	0	0	0	0	0	0	0	0	0	0	0
MIR200B	1	0	1	1	up	0	0	0	0	0	0	0	0	0	0	0	0
MIR200A	1	0	1	1	up	0	0	0	0	0	0	0	0	0	0	0	0
MIR429	1	0	1	1	up	0	0	0	0	0	0	0	0	0	0	0	0
TTLL10	-2.04551	-1.03246	0.705896	1	down	0.190585	0.638283	0	0.762338	0	0	0	0	2.84401	0	0.985688	0
TNFRSF18	1.17872	0.237227	0.648912	0.999062	up	10.0757	8.26035	10.129	9.9104	13.4698	6.79356	5.77381	14.4372	4.26602	13.3972	5.91413	5.77381
TNFRSF4	1.48369	0.569194	0.170954	0.999062	up	29.7628	19.6871	22.4285	25.1572	40.4094	31.0563	11.5476	28.8743	15.6421	35.7258	14.7853	11.5476
SDF4	1.05183	0.0729071	0.630022	0.999062	up	2230.28	2119.85	2381.76	2174.95	2404.97	1959.46	2217.14	2189.64	1628.2	2498.57	1968.42	2217.14
B3GALT6	1.11005	0.150628	0.618088	0.999062	up	63.8073	57.2649	80.3085	61.7494	63.6754	49.4959	68.131	72.1858	27.0181	64.753	43.3703	68.131
FAM132A	1.08275	0.114699	0.876384	0.999062	up	16.6531	15.3493	11.576	12.1974	14.6943	28.1448	1.15476	14.4372	24.1741	24.5615	26.6136	1.15476
UBE2J2	1.11694	0.159551	0.341453	0.999062	up	1009.19	903.215	895.693	1020.01	886.557	1234.49	786.394	927.416	866.001	916.59	1136.5	786.394
SCNN1D	1.09453	0.130316	0.800023	0.999062	up	11.0729	10.0505	9.4055	19.0585	6.12263	9.70509	10.3929	17.1871	4.26602	11.1643	6.89981	10.3929
ACAP3	1.08284	0.114823	0.554701	0.999062	up	697.546	643.885	813.214	750.141	585.324	641.506	660.524	810.544	435.134	626.318	670.268	660.524
MIR6726	-1.64717	-0.719993	0.823388	1	down	0	0.237001	0	0	0	0	0	0	1.42201	0	0	0
PUSL1	1.12279	0.167091	0.639488	0.999062	up	65.0347	57.8796	85.373	46.5026	42.8584	85.4048	35.7976	63.936	46.9262	85.9652	78.855	35.7976
CPSF3L	1.14378	0.193812	0.248671	0.999062	up	851.72	744.156	911.61	912.519	766.553	816.198	687.084	876.542	550.316	850.72	813.192	687.084
MIR6727	-2.36613	-1.24253	0.345858	1	down	0.614087	1.51487	0.7235	0.762338	0	0.970509	2.30953	2.06245	1.42201	0	0.985688	2.30953
CPTP	1.36293	0.446708	0.144822	0.999062	up	312.021	228.664	313.276	311.796	228.986	394.027	140.881	281.868	194.815	247.848	365.69	140.881
TAS1R3	1.03368	0.0477928	0.920011	0.999062	up	31.004	30.0851	31.1105	29.7312	9.79621	53.378	16.1667	29.5618	34.1281	31.2601	53.2271	16.1667
DVL1	1.07324	0.101969	0.708348	0.999062	up	251.215	233.913	303.87	299.599	217.966	183.426	235.572	301.805	122.292	291.388	216.851	235.572
MIR6808	1	0	1	1	up	0	0	0	0	0	0	0	0	0	0	0	0
MXRA8	1.22749	0.295711	0.596488	0.999062	up	10.5488	8.5205	12.2995	16.0091	6.12263	7.76407	9.2381	15.8121	2.84401	10.0479	3.94275	9.2381
AURKAIP1	1.12516	0.170126	0.480696	0.999062	up	1424.21	1265.5	1264.68	1351.63	1320.04	1760.5	857.989	1334.41	1267.01	1617.71	1657.93	857.989
CCNL2	1.03026	0.0430028	0.799449	0.999062	up	1712.14	1661.98	2040.99	1771.67	1582.09	1453.82	1838.38	1810.15	1272.69	1758.38	1453.89	1838.38
LOC148413	1.05852	0.0820496	0.739387	0.999062	up	75.1414	70.6232	57.88	77.7585	97.9621	66.9651	61.2024	65.311	68.2563	102.712	65.0554	61.2024
MRPL20	1.04037	0.0570902	0.814945	0.999062	up	131.859	126.471	112.143	153.992	155.515	105.785	155.893	121.685	81.0543	141.787	102.512	155.893
ANKRD65	1.6841	0.751981	3.90878e-05	0.00273926	up	154.146	91.6557	147.594	174.575	142.045	152.37	84.2977	98.9977	109.494	70.3351	102.512	84.2977
TMEM88B	1	0	1	1	up	0	0	0	0	0	0	0	0	0	0	0	0
LOC102724312	1	0	1	1	up	0	0	0	0	0	0	0	0	0	0	0	0
VWA1	1	0	1	1	up	0	0	0	0	0	0	0	0	0	0	0	0
ATAD3C	-1.01969	-0.028131	0.882326	0.999062	down	209.298	213.501	193.175	199.733	186.128	258.155	177.833	219.307	264.493	193.142	248.393	177.833
ATAD3B	1.1476	0.198616	0.61283	0.999062	up	77.3912	67.1294	80.3085	100.629	82.0433	46.5844	70.4405	105.185	21.3301	87.0816	48.2987	70.4405
ATAD3A	1.3081	0.387473	0.296736	0.999062	up	52.702	40.0287	49.198	69.3728	56.3282	35.9088	42.7262	57.0612	17.0641	56.938	23.6565	42.7262
TMEM240	-1.31215	-0.391938	0.472673	0.999062	down	7.79066	10.3787	6.5115	12.1974	8.57168	3.88203	13.8572	8.24981	9.95404	13.3972	2.95706	13.8572
SSU72	1.04359	0.0615575	0.718669	0.999062	up	2470.72	2366.68	2050.4	2456.25	2828.66	2547.59	1971.18	2485.94	2265.25	3008.78	2497.73	1971.18
C1orf233	-1.06137	-0.0859305	0.88115	0.999062	down	22.3168	23.8424	38.3455	17.5338	15.9188	17.4692	35.7976	9.62478	2.84401	32.3765	26.6136	35.7976
MIB2	1.047	0.0662662	0.678027	0.999062	up	975.849	931.684	1146.02	951.398	897.578	908.396	919.191	1062.16	692.517	1010.37	986.674	919.191
MMP23B	1.75896	0.814722	0.406011	1	up	2.76423	1.49548	3.6175	3.04935	2.44905	1.94102	1.15476	4.1249	1.42201	1.11643	0	1.15476
MMP23A	-1.00769	-0.011045	0.988737	1	down	3.92533	3.89169	1.447	8.38572	4.8981	0.970509	2.30953	6.18736	4.26602	3.34929	4.92844	2.30953
CDK11B	-1.10563	-0.144868	0.508258	0.999062	down	4045.77	4472.73	3500.29	3355.81	5386.69	3940.27	3851.13	3556.35	5107.84	6202.89	4267.04	3851.13
SLC35E2B	1.11968	0.163085	0.555433	0.999062	up	2750.33	2456.17	2487.39	2751.28	2740.49	3022.16	1408.81	2891.56	3063	2840.2	3124.63	1408.81
CDK11A	-1.09834	-0.135326	0.464853	0.999062	down	2945.08	3234.09	2595.19	2499.71	3843.79	2841.65	3205.62	2595.25	3156.85	4144.19	3097.03	3205.62
SLC35E2	1.04586	0.0646928	0.746643	0.999062	up	1808.11	1728.74	1785.6	2062.13	1312.69	2072.04	1683.64	2093.39	1497.37	1329.67	2084.73	1683.64
NADK	-1.07132	-0.0993876	0.517565	0.999062	down	30419.3	32589	30896.3	28408.5	27662	34710.2	27518	32876.9	39072.4	31625.1	36923.9	27518
GNB1	1.03912	0.0553574	0.696907	0.999062	up	15917.1	15318.4	16976.9	13774.7	15218.4	17698.2	14208.2	12991.4	17035.6	15764	17703	14208.2
CALML6	1.54314	0.625871	0.845714	1	up	0.36175	0.114581	1.447	0	0	0	0	0.687484	0	0	0	0
TMEM52	-3.91268	-1.96816	0.273133	1	down	0.37146	1.71298	0.7235	0.762338	0	0	3.46429	0	0	3.34929	0	3.46429
CFAP74	-1.64717	-0.719993	0.823388	1	down	0	0.164281	0	0	0	0	0	0	0	0	0.985688	0
GABRD	1	0	1	1	up	0	0	0	0	0	0	0	0	0	0	0	0
PRKCZ	-1.13244	-0.179435	0.408043	0.999062	down	406.077	460.822	505.003	362.873	408.992	347.442	468.834	327.93	610.04	523.606	365.69	468.834
FAAP20	1.06808	0.0950254	0.500361	0.999062	up	766.442	717.352	805.979	742.518	717.572	799.699	610.87	756.232	698.205	796.015	831.921	610.87
SKI	1.04783	0.0674011	0.679525	0.999062	up	7868.44	7508.63	7151.07	7146.92	8237.39	8938.39	6295.77	7365.7	7179.71	8854.41	9060.44	6295.77
MORN1	-1.05835	-0.0818205	0.78336	0.999062	down	38.2988	40.5156	36.175	54.8884	28.1641	33.9678	33.4881	54.3112	31.2841	49.1229	41.3989	33.4881
LOC100129534	-1.25868	-0.331906	0.428001	0.999062	down	15.211	19.4922	17.364	26.6818	6.12263	10.6756	17.3214	25.4369	17.0641	20.0958	19.7138	17.3214
RER1	1.08639	0.119548	0.267642	0.999062	up	1955.53	1799.69	1929.57	1942.44	1839.24	2110.86	1801.43	1753.08	1594.07	1809.73	2038.4	1801.43
PEX10	1.30839	0.387788	0.393495	0.999062	up	22.9106	17.2218	21.705	25.1572	14.6943	30.0858	9.2381	30.2493	11.376	15.63	27.5993	9.2381
PLCH2	1.62755	0.702702	0.302006	0.999062	up	65.3612	39.9141	47.0275	115.875	82.0433	16.4986	17.3214	104.498	17.0641	71.4516	11.8283	17.3214
PANK4	-1.13637	-0.184437	0.216267	0.999062	down	485.996	552.336	531.773	458.928	417.563	535.721	542.739	562.362	447.932	647.53	570.713	542.739
HES5	1.39691	0.482236	0.881169	1	up	0.306132	0	0	0	1.22453	0	0	0	0	0	0	0
LOC115110	1.05808	0.0814457	0.626307	0.999062	up	358.626	339.184	428.312	317.133	364.909	324.15	345.274	332.055	319.951	417.545	275.007	345.274
TNFRSF14	1.21269	0.278215	0.242411	0.999062	up	4088.81	3371.21	4411.18	4109.77	4053.18	3781.1	2412.3	4140.03	2602.27	4705.75	3954.58	2412.3
LOC100996583	1.24293	0.313741	0.371151	0.999062	up	25.7962	20.3849	23.152	24.3948	34.2867	21.3512	12.7024	24.7494	18.4861	29.0272	24.6422	12.7024
FAM213B	1.04776	0.0673075	0.702089	0.999062	up	177.094	169.207	191.004	192.109	145.719	179.544	163.976	181.496	137.935	212.122	155.739	163.976
MMEL1	-1.63995	-0.713656	0.430828	1	down	2.45628	3.98985	2.894	2.28701	3.67358	0.970509	8.08334	3.43742	0	3.34929	0.985688	8.08334
TTC34	-1.74082	-0.799763	0.782969	1	down	0.242627	0.393443	0	0	0	0.970509	0	1.37497	0	0	0.985688	0
ACTRT2	1	0	1	1	up	0	0	0	0	0	0	0	0	0	0	0	0
LINC00982	-2.33711	-1.22472	0.704027	1	down	0	0.384921	0	0	0	0	1.15476	0	0	0	0	1.15476
PRDM16	1.63551	0.709741	0.649191	1	up	1.04905	0.614082	1.447	1.52468	1.22453	0	1.15476	1.37497	0	0	0	1.15476
MIR4251	1	0	1	1	up	0	0	0	0	0	0	0	0	0	0	0	0
ARHGEF16	1.96642	0.975568	0.525069	1	up	1.28993	0.629215	0.7235	1.52468	0	2.91153	0	0.687484	0	1.11643	1.97138	0
MEGF6	1.12415	0.168839	0.444904	0.999062	up	2923.89	2600.74	3524.89	3001.33	2444.15	2725.19	2816.47	3024.24	1480.31	2586.77	2880.18	2816.47
MIR551A	1.39691	0.482236	0.881169	1	up	0.306132	0	0	0	1.22453	0	0	0	0	0	0	0
TPRG1L	1.07864	0.109214	0.556218	0.999062	up	3606.36	3343.31	3765.09	3463.3	2843.35	4353.7	2846.49	3559.1	3058.73	3354.87	4394.2	2846.49
WRAP73	-1.07456	-0.103747	0.643938	0.999062	down	368.59	396.394	436.994	352.963	281.641	402.761	491.929	355.429	274.447	325.998	438.631	491.929
TP73	1.18087	0.239851	0.642201	0.999062	up	8.8821	7.53843	10.8525	8.38572	3.67358	12.6166	8.08334	7.56232	2.84401	7.81501	10.8426	8.08334
TP73-AS1	1.02908	0.0413558	0.78804	0.999062	up	206.141	200.198	201.857	212.692	180.005	230.011	184.762	218.62	201.925	177.512	233.608	184.762
CCDC27	1.83766	0.877872	0.784045	1	up	0.485254	0.114581	0	0	0	1.94102	0	0.687484	0	0	0	0
SMIM1	1.05871	0.082304	0.90633	1	up	4.77583	4.56739	6.5115	3.81169	4.8981	3.88203	1.15476	4.1249	7.11003	8.93144	4.92844	1.15476
LRRC47	1.02803	0.0398754	0.838992	0.999062	up	444.461	432.276	434.824	428.434	352.664	561.925	413.405	437.927	401.006	348.326	579.584	413.405
CEP104	-1.02044	-0.0291931	0.89521	0.999062	down	876.657	895.104	943.444	1058.89	626.957	877.34	922.656	1098.6	1050.86	596.174	779.679	922.656
DFFB	-1.08338	-0.115538	0.579336	0.999062	down	324.191	351.918	366.091	311.796	227.762	391.115	326.798	362.304	445.088	269.06	381.461	326.798
C1orf174	-1.00671	-0.00965341	0.933672	0.999062	down	416.45	419.602	434.824	388.03	423.686	419.26	401.857	415.24	466.418	448.805	383.433	401.857
LINC01134	-1.11168	-0.152742	0.625529	0.999062	down	220.393	245.092	201.857	214.979	167.76	296.976	162.822	287.368	365.455	161.882	330.205	162.822
LINC01346	1	0	1	1	up	0	0	0	0	0	0	0	0	0	0	0	0
LOC284661	1	0	1	1	up	0	0	0	0	0	0	0	0	0	0	0	0
AJAP1	-1.0391	-0.0553386	0.936426	0.999062	down	11.0967	11.6478	20.9815	6.86104	4.8981	11.6461	23.0953	8.93729	1.42201	4.46572	8.87119	23.0953
MIR4417	1	0	1	1	up	0	0	0	0	0	0	0	0	0	0	0	0
MIR4689	1	0	1	1	up	0	0	0	0	0	0	0	0	0	0	0	0
NPHP4	1.14799	0.199111	0.236554	0.999062	up	155.406	135.909	177.258	144.844	143.27	156.252	135.107	114.81	140.779	125.04	164.61	135.107
KCNAB2	1.18045	0.239331	0.39264	0.999062	up	4571.02	3872.51	6138.9	3846.76	2669.47	5628.95	3494.31	3823.79	3772.58	2800.01	5850.06	3494.31
CHD5	-1.025	-0.0356283	0.977525	1	down	1.48051	1.54636	0.7235	2.28701	0	2.91153	0	1.37497	2.84401	1.11643	3.94275	0
RPL22	1.08412	0.116524	0.830627	0.999062	up	606.999	559.708	426.142	955.972	877.985	167.898	715.953	843.543	194.815	731.262	156.724	715.953
LOC102724450	1	0	1	1	up	0	0	0	0	0	0	0	0	0	0	0	0
RNF207	-1.0023	-0.00332148	0.989465	0.999062	down	282.818	283.65	262.631	276.729	224.088	367.823	229.798	296.993	385.363	194.259	365.69	229.798
ICMT	1.00531	0.00764005	0.965136	0.999062	up	205.878	204.99	193.898	221.078	177.556	230.981	214.786	228.932	227.521	150.718	193.195	214.786
LINC00337	1.09466	0.130479	0.657427	0.999062	up	39.9179	36.4865	39.069	54.126	25.7151	40.7614	28.8691	48.8114	34.1281	36.8422	41.3989	28.8691
HES3	1	0	1	1	up	0	0	0	0	0	0	0	0	0	0	0	0
GPR153	-1.69269	-0.759322	0.288337	0.999062	down	19.2542	32.5918	17.364	26.6818	23.266	9.70509	69.2858	24.7494	1.42201	18.9793	11.8283	69.2858
ACOT7	-1.00031	-0.000447403	0.999195	0.999707	down	17.4007	17.2622	15.1935	25.1572	14.6943	14.5576	21.9405	24.7494	4.26602	17.8629	12.8139	21.9405
HES2	-1.11387	-0.155581	0.47294	0.999062	down	351.653	391.887	329.193	291.213	323.275	462.933	346.429	356.804	531.83	311.484	458.345	346.429
ESPN	1.02455	0.0349871	0.977625	1	up	2.34861	2.16043	1.447	3.04935	4.8981	0	1.15476	6.18736	0	4.46572	0	1.15476
MIR4252	1	0	1	1	up	0	0	0	0	0	0	0	0	0	0	0	0
TNFRSF25	1.48093	0.566505	0.464203	0.999062	up	146.8	98.9434	117.207	321.707	134.698	13.5871	49.6548	304.555	45.5042	129.506	14.7853	49.6548
PLEKHG5	1.42658	0.512564	0.368713	0.999062	up	7.26124	5.00096	7.235	8.38572	8.57168	4.85254	6.92858	6.18736	1.42201	5.58215	2.95706	6.92858
NOL9	-1.07047	-0.0982468	0.544431	0.999062	down	811.931	869.42	747.376	789.02	712.674	998.653	837.203	875.855	1033.8	700.002	932.461	837.203
TAS1R1	1.26038	0.333857	0.480587	0.999062	up	23.79	18.6699	17.364	16.0091	17.1434	44.6434	13.8572	23.3745	18.4861	8.93144	33.5134	13.8572
ZBTB48	-1.08646	-0.119632	0.484858	0.999062	down	644.264	699.891	596.164	622.068	533.893	824.932	616.643	742.483	738.021	657.578	827.978	616.643
KLHL21	-1.22652	-0.294566	0.244266	0.999062	down	2640.61	3239.36	3264.43	2678.09	2064.55	2555.35	2270.26	3605.17	4395.42	4210.06	2685.01	2270.26
PHF13	-1.10911	-0.149401	0.374675	0.999062	down	199.276	221.391	223.562	189.822	170.209	213.512	257.512	211.745	179.173	206.54	215.866	257.512
THAP3	1.21764	0.28409	0.297052	0.999062	up	47.2824	39.0856	50.645	62.5117	29.3886	46.5844	41.5715	47.4364	35.5501	36.8422	31.542	41.5715
DNAJC11	-1.03137	-0.0445586	0.921346	0.999062	down	47.1628	48.3522	47.0275	60.9871	61.2263	19.4102	60.0477	72.8733	12.798	46.8901	37.4561	60.0477
LOC100505887	1	0	1	1	up	0	0	0	0	0	0	0	0	0	0	0	0
CAMTA1	-1.162	-0.216605	0.463079	0.999062	down	97.2035	112.865	80.3085	119.687	110.207	78.6112	161.667	104.498	72.5223	96.013	80.8264	161.667
VAMP3	1.1206	0.164274	0.197648	0.999062	up	4570.36	4078.21	3875.79	4856.86	5263.01	4285.77	4258.77	3804.54	4359.87	3706.55	4080.75	4258.77
PER3	1.09892	0.136082	0.772769	0.999062	up	58.958	53.5539	61.4975	99.104	53.8792	21.3512	46.1905	107.248	49.7702	50.2394	21.6851	46.1905
UTS2	7.46717	2.90056	0.331689	1	up	1.45138	0	2.894	0	0	2.91153	0	0	0	0	0	0
TNFRSF9	-1.97321	-0.980545	0.00184372	0.0674384	down	906.598	1789.37	708.307	911.757	787.37	1218.96	2060.1	1335.78	3014.65	1115.31	1150.3	2060.1
PARK7	-1.06801	-0.0949285	0.661513	0.999062	down	490.203	523.071	384.902	483.322	499.607	592.981	647.822	486.739	345.547	481.182	529.314	647.822
ERRFI1	-1.79577	-0.844601	0.187695	0.999062	down	27.9777	50.3017	13.7465	56.413	28.1641	13.5871	94.6906	43.3115	7.11003	41.3079	20.6994	94.6906
LOC102724539	1.39691	0.482236	0.881169	1	up	0.242627	0	0	0	0	0.970509	0	0	0	0	0	0
SLC45A1	-1.36343	-0.447245	0.718861	1	down	1.28197	1.77478	2.1705	0.762338	1.22453	0.970509	0	0.687484	1.42201	5.58215	2.95706	0
RERE	1.45312	0.539158	0.0029453	0.0971826	up	24338.1	16748.4	25669.1	25693.8	25502	20487.4	13060.4	19266.7	16788.2	17522.4	20792.1	13060.4
LOC102724552	3.11949	1.64131	5.26596e-08	7.06799e-06	up	345.872	110.88	362.474	393.367	466.544	161.104	88.9167	123.06	136.513	136.205	91.669	88.9167
ENO1	1.02577	0.0367088	0.807421	0.999062	up	2850.73	2779.46	3294.1	2371.63	2898.45	2838.74	2928.48	2221.95	2559.61	3037.81	3000.43	2928.48
MIR6728	-1.41644	-0.502266	0.863956	1	down	0.242627	0.350353	0	0	0	0.970509	0	0	0	1.11643	0.985688	0
ENO1-AS1	-3.20559	-1.68059	0.434911	1	down	0.242627	0.889235	0	0	0	0.970509	0	1.37497	2.84401	1.11643	0	0
CA6	1.43223	0.518265	0.711481	1	up	5.3554	3.68716	5.0645	5.33637	11.0207	0	0	6.18736	1.42201	14.5136	0	0
SLC2A7	1.39691	0.482236	0.881169	1	up	0.180875	0	0.7235	0	0	0	0	0	0	0	0	0
SLC2A5	-2.702	-1.43403	0.137777	0.992768	down	15.367	41.6553	17.364	22.8701	13.4698	7.76407	109.702	15.8121	0	7.81501	6.89981	109.702
GPR157	1.17936	0.238004	0.675451	0.999062	up	50.2056	42.3818	42.6865	24.3948	31.8377	101.903	25.4048	35.0617	14.2201	45.7737	108.426	25.4048
MIR34A	1	0	1	1	up	0	0	0	0	0	0	0	0	0	0	0	0
H6PD	1.24703	0.318501	0.180516	0.999062	up	2141.09	1716.92	1468.71	2525.63	2156.39	2413.66	1561.24	1708.4	2168.56	1119.78	2182.31	1561.24
SPSB1	-1.18267	-0.242051	0.583601	0.999062	down	19.7885	23.0521	11.576	22.1078	36.7358	8.73458	21.9405	27.4994	28.4401	25.6779	12.8139	21.9405
LOC100506022	1.06878	0.0959654	0.748031	0.999062	up	101.403	95.0107	90.4375	93.0053	69.798	152.37	73.9048	85.9355	119.448	75.9173	140.953	73.9048
SLC25A33	-1.58089	-0.660736	0.142768	0.999062	down	61.1923	96.826	72.35	80.0455	71.0225	21.3512	147.81	101.748	52.6142	91.5473	39.4275	147.81
TMEM201	1.01992	0.0284577	0.960938	0.999062	up	15.4633	15.0467	16.6405	26.6818	9.79621	8.73458	8.08334	35.0617	9.95404	21.2122	7.8855	8.08334
PIK3CD	1.19464	0.256571	0.338273	0.999062	up	35164.4	29435	33783.8	33391.2	26103.2	47379.3	21635.6	32513.2	28147.2	25492.6	47185.9	21635.6
PIK3CD-AS1	1.06244	0.0873821	0.760836	0.999062	up	187.602	176.897	162.788	152.468	221.639	213.512	142.036	112.747	291.511	214.355	158.696	142.036
PIK3CD-AS2	1.35222	0.435334	0.462863	0.999062	up	34.4542	25.5566	25.3225	38.8793	36.7358	36.8793	4.61905	28.1868	58.3022	29.0272	28.5849	4.61905
CLSTN1	1.15104	0.202935	0.431859	0.999062	up	1644.8	1428.58	1165.56	1518.58	1503.72	2391.33	1124.74	1412.78	1359.44	1400	2149.79	1124.74
CTNNBIP1	1.09938	0.136687	0.588697	0.999062	up	276.41	251.718	335.704	340.003	182.454	247.48	306.012	277.744	169.219	200.958	250.365	306.012
LZIC	-1.26287	-0.336708	0.199857	0.999062	down	148.253	187.155	157.723	115.875	168.985	150.429	262.131	149.872	145.045	169.697	134.054	262.131
NMNAT1	1.00231	0.00332569	0.985919	0.999062	up	868.711	867.276	881.947	784.446	694.306	1114.14	823.346	792.669	1073.61	708.933	981.745	823.346
MIR5697	-1.74082	-0.799763	0.782969	1	down	0.242627	0.393443	0	0	0	0.970509	0	1.37497	0	0	0.985688	0
RBP7	1.0052	0.00748382	0.972803	0.999062	up	628.002	624.824	756.781	560.319	674.714	520.193	799.096	552.737	449.354	634.133	514.529	799.096
UBE4B	1.05335	0.0749881	0.589568	0.999062	up	4388.07	4165.61	4679.6	4658.65	3745.83	4468.22	4149.06	4679.7	3449.79	3858.38	4707.65	4149.06
KIF1B	1.03223	0.0457704	0.847467	0.999062	up	6496.45	6293.46	4942.23	5683.99	6761.83	8597.74	5039.39	5313.56	8075.57	5751.85	8540.99	5039.39
MIR1273D	-1.35075	-0.433765	0.612254	1	down	2.78978	3.73574	0	4.57403	3.67358	2.91153	2.30953	3.43742	5.68802	6.69858	1.97138	2.30953
RNU6-1	1	0	1	1	up	0	0	0	0	0	0	0	0	0	0	0	0
RNU6-2	1	0	1	1	up	0	0	0	0	0	0	0	0	0	0	0	0
RNU6-7	1	0	1	1	up	0	0	0	0	0	0	0	0	0	0	0	0
RNU6-9	1	0	1	1	up	0	0	0	0	0	0	0	0	0	0	0	0
RNU6-8	1	0	1	1	up	0	0	0	0	0	0	0	0	0	0	0	0
PGD	-1.00745	-0.0107019	0.944617	0.999062	down	13277.7	13376.6	12361	11161.4	14121.2	15467	13886	10382.4	14572.7	13023.2	14509.3	13886
APITD1-CORT	1	0	1	1	up	0	0	0	0	0	0	0	0	0	0	0	0
APITD1	-2.52715	-1.33751	0.472607	1	down	0.381169	1.08024	0	1.52468	0	0	1.15476	2.74994	1.42201	0	0	1.15476
CORT	-1.0375	-0.0531102	0.986799	1	down	0.381169	0.343742	0	1.52468	0	0	0	2.06245	0	0	0	0
DFFA	1.05157	0.0725429	0.644601	0.999062	up	783.555	745.25	779.933	691.441	717.572	945.275	670.917	742.483	873.111	665.393	848.677	670.917
PEX14	1.17998	0.238767	0.608499	0.999062	up	56.0636	47.3749	56.433	81.5702	64.8999	21.3512	48.5	74.9358	28.4401	68.1023	15.771	48.5
CASZ1	-1.00662	-0.00951456	0.962751	0.999062	down	640.764	644.308	563.607	660.185	804.514	534.75	558.905	730.108	601.508	875.282	541.143	558.905
C1orf127	-2.58663	-1.37107	0.271958	1	down	1.03934	2.60309	2.1705	0.762338	1.22453	0	1.15476	8.24981	0	1.11643	3.94275	1.15476
TARDBP	-1.17026	-0.226825	0.264639	0.999062	down	946.906	1108.06	846.495	1069.56	1115.54	756.026	1312.97	1091.04	1089.26	1092.99	749.123	1312.97
MASP2	-1.91377	-0.936416	0.00393685	0.120403	down	47.1247	90.3751	38.3455	52.6013	53.8792	43.6729	101.619	83.8731	145.045	64.753	45.3416	101.619
SRM	1.3648	0.448687	0.470292	0.999062	up	46.0449	33.5283	32.5575	99.104	37.9603	14.5576	20.7857	85.9355	14.2201	44.6572	14.7853	20.7857
EXOSC10	-1.13294	-0.180073	0.633714	0.999062	down	258.104	292.261	280.718	304.935	296.335	150.429	397.238	364.367	120.87	325.998	147.853	397.238
MTOR	1.06272	0.0877549	0.6945	0.999062	up	1026.15	965.571	1165.56	1179.34	1062.89	696.825	1073.93	1117.85	756.507	1085.17	686.039	1073.93
MTOR-AS1	-3.42886	-1.77773	0.353719	1	down	0.180875	0.973503	0.7235	0	0	0	1.15476	0.687484	2.84401	0	0	1.15476
ANGPTL7	2.66226	1.41265	0.499351	1	up	1.46722	0.458323	0	0.762338	1.22453	3.88203	0	2.74994	0	0	0	0
UBIAD1	1.04661	0.0657296	0.653655	0.999062	up	189.335	181.336	184.493	197.446	162.862	212.541	183.607	190.433	199.081	160.766	170.524	183.607
PTCHD2	1.83366	0.874723	0.780024	1	up	0.952923	0.458323	0	3.81169	0	0	0	2.74994	0	0	0	0
LOC101929181	-1.04285	-0.0605359	0.856044	0.999062	down	77.7732	81.5301	93.3315	65.5611	60.0018	92.1983	54.2739	67.3734	139.357	62.5201	111.383	54.2739
FBXO2	1.57216	0.652751	0.586441	1	up	4.10175	2.53258	7.235	3.04935	6.12263	0	1.15476	6.18736	0	6.69858	0	1.15476
FBXO44	1.401	0.486459	0.00633257	0.171445	up	197.933	141.558	200.41	239.374	171.434	180.515	122.405	162.934	163.531	144.02	134.054	122.405
FBXO6	1.94098	0.956785	5.16688e-08	6.99428e-06	up	1515.84	780.641	1747.25	1222.03	1913.93	1180.14	794.477	796.106	773.571	710.05	815.164	794.477
MAD2L2	1.34662	0.429341	0.0070153	0.184259	up	281.616	209.11	331.363	275.966	303.682	215.453	213.631	214.495	193.393	215.471	204.037	213.631
DRAXIN	1.56415	0.645382	0.603588	1	up	1.72307	1.07408	0.7235	1.52468	3.67358	0.970509	0	0.687484	1.42201	3.34929	0.985688	0
AGTRAP	1.33055	0.412021	0.120435	0.956067	up	3265.92	2454.68	4346.06	2874.78	2102.51	3740.34	1912.29	2664.69	2492.78	2074.33	3671.69	1912.29
C1orf167	-1.19437	-0.256245	0.875203	1	down	1.58277	1.82645	0	0	2.44905	3.88203	0	2.74994	4.26602	0	3.94275	0
LOC102724659	-1.17342	-0.230719	0.418526	0.999062	down	72.3061	85.2313	75.9675	55.6507	67.3489	90.2573	63.512	67.3734	139.357	85.9652	91.669	63.512
MTHFR	1.20811	0.27275	0.414635	0.999062	up	766.791	634.605	770.528	647.225	446.952	1202.46	483.846	628.36	531.83	531.421	1148.33	483.846
CLCN6	1.09065	0.125183	0.674607	0.999062	up	222.394	203.802	260.46	208.118	134.698	286.3	161.667	233.057	145.045	193.142	328.234	161.667
NPPA-AS1	1.18933	0.250153	0.660986	0.999062	up	22.5962	18.879	18.0875	12.9598	14.6943	44.6434	19.631	11.6872	5.68802	12.2807	44.356	19.631
NPPA	1.34244	0.424861	0.406211	0.999062	up	19.8065	14.7707	27.493	9.14806	13.4698	29.1153	13.8572	8.24981	9.95404	11.1643	31.542	13.8572
NPPB	-1.64717	-0.719993	0.823388	1	down	0	0.164281	0	0	0	0	0	0	0	0	0.985688	0
RNU5E-1	1.92278	0.943195	0.432374	1	up	1.96927	1.03173	2.1705	2.28701	2.44905	0.970509	0	1.37497	2.84401	0	1.97138	0
KIAA2013	1.19999	0.263017	0.27226	0.999062	up	3311.23	2759.31	3883.02	3015.05	2239.66	4107.19	2243.7	3174.8	2478.56	2501.92	3913.18	2243.7
PLOD1	1.11291	0.154339	0.44909	0.999062	up	1895.36	1703.54	2393.34	2038.49	1260.04	1889.58	1638.61	1982.7	1717.78	1335.25	1908.29	1638.61
MFN2	-1.52076	-0.604791	0.129416	0.970501	down	6435.45	9787.51	9422.14	6052.2	2968.25	7299.2	8766.96	8954.48	18117.8	3837.17	10281.7	8766.96
MIIP	1.23566	0.305278	0.41625	0.999062	up	633.583	512.827	879.053	504.668	320.826	829.785	336.036	552.05	558.848	351.676	942.318	336.036
MIR6729	-1.12822	-0.174047	0.918993	1	down	0.552335	0.663783	1.447	0.762338	0	0	1.15476	0.687484	0	0	0.985688	1.15476
TNFRSF8	-1.22883	-0.297282	0.398547	0.999062	down	380.422	467.547	343.663	248.522	260.824	668.681	300.238	382.241	604.352	588.359	629.855	300.238
MIR7846	-1.41576	-0.501579	0.857167	1	down	0.306132	0.423073	0	0	1.22453	0	0	0	1.42201	1.11643	0	0
TNFRSF1B	-1.15776	-0.211342	0.424016	0.999062	down	48806.5	56506.4	51187.6	40131.8	54490.2	49416.4	36751.5	54276.9	77769.5	79881.7	53607.6	36751.5
MIR4632	-1.41723	-0.503076	0.569992	0.999062	down	3.87146	5.44458	2.894	3.81169	4.8981	3.88203	0	7.56232	11.376	7.81501	5.91413	0
VPS13D	-1.08063	-0.111874	0.345556	0.999062	down	2339.18	2528.93	2276.85	2377.73	2194.35	2507.79	2532.39	2348.45	3008.96	2267.47	2483.93	2532.39
SNORA59A	1	0	1	1	up	0	0	0	0	0	0	0	0	0	0	0	0
SNORA59B	1	0	1	1	up	0	0	0	0	0	0	0	0	0	0	0	0
DHRS3	1.6535	0.725525	0.382339	0.999062	up	60.4957	36.3884	46.304	117.4	68.5735	9.70509	21.9405	108.622	2.84401	58.0544	4.92844	21.9405
MIR6730	1.39691	0.482236	0.881169	1	up	0.190585	0	0	0.762338	0	0	0	0	0	0	0	0
AADACL4	1	0	1	1	up	0	0	0	0	0	0	0	0	0	0	0	0
AADACL3	-1.9447	-0.959549	0.509903	1	down	0.623796	1.2857	0	1.52468	0	0.970509	2.30953	0.687484	1.42201	0	0.985688	2.30953
C1orf158	1	0	1	1	up	0	0	0	0	0	0	0	0	0	0	0	0
PRAMEF12	1	0	1	1	up	0	0	0	0	0	0	0	0	0	0	0	0
PRAMEF1	1	0	1	1	up	0	0	0	0	0	0	0	0	0	0	0	0
PRAMEF11	1	0	1	1	up	0	0	0	0	0	0	0	0	0	0	0	0
HNRNPCL1	1.19896	0.261787	0.540502	0.999062	up	151.619	126.15	104.908	115.875	277.967	107.726	91.2263	85.9355	88.1643	279.108	121.24	91.2263
PRAMEF2	1	0	1	1	up	0	0	0	0	0	0	0	0	0	0	0	0
PRAMEF4	1	0	1	1	up	0	0	0	0	0	0	0	0	0	0	0	0
PRAMEF10	1	0	1	1	up	0	0	0	0	0	0	0	0	0	0	0	0
PRAMEF7	1	0	1	1	up	0	0	0	0	0	0	0	0	0	0	0	0
PRAMEF6	1	0	1	1	up	0	0	0	0	0	0	0	0	0	0	0	0
LOC101929983	1	0	1	1	up	0	0	0	0	0	0	0	0	0	0	0	0
HNRNPCL3	1	0	1	1	up	0	0	0	0	0	0	0	0	0	0	0	0
HNRNPCL4	1	0	1	1	up	0	0	0	0	0	0	0	0	0	0	0	0
PRAMEF25	1	0	1	1	up	0	0	0	0	0	0	0	0	0	0	0	0
PRAMEF26	1	0	1	1	up	0	0	0	0	0	0	0	0	0	0	0	0
LOC649324	1	0	1	1	up	0	0	0	0	0	0	0	0	0	0	0	0
LOC645354	1	0	1	1	up	0	0	0	0	0	0	0	0	0	0	0	0
HNRNPCL2	1.32112	0.401762	0.452048	0.999062	up	101.321	76.3862	58.6035	60.9871	221.639	64.0536	43.881	54.9987	44.0822	188.677	82.7978	43.881
PRAMEF9	1	0	1	1	up	0	0	0	0	0	0	0	0	0	0	0	0
LOC400736	1	0	1	1	up	0	0	0	0	0	0	0	0	0	0	0	0
LOC391003	1	0	1	1	up	0	0	0	0	0	0	0	0	0	0	0	0
PRAMEF22	1	0	1	1	up	0	0	0	0	0	0	0	0	0	0	0	0
PRAMEF5	1	0	1	1	up	0	0	0	0	0	0	0	0	0	0	0	0
PRAMEF8	1	0	1	1	up	0	0	0	0	0	0	0	0	0	0	0	0
LOC645382	1	0	1	1	up	0	0	0	0	0	0	0	0	0	0	0	0
PRAMEF15	1	0	1	1	up	0	0	0	0	0	0	0	0	0	0	0	0
PRAMEF14	1	0	1	1	up	0	0	0	0	0	0	0	0	0	0	0	0
PRAMEF19	1	0	1	1	up	0	0	0	0	0	0	0	0	0	0	0	0
PRAMEF16	1	0	1	1	up	0	0	0	0	0	0	0	0	0	0	0	0
PRAMEF17	1	0	1	1	up	0	0	0	0	0	0	0	0	0	0	0	0
PRAMEF20	1	0	1	1	up	0	0	0	0	0	0	0	0	0	0	0	0
LRRC38	-2.90656	-1.53931	0.407611	1	down	0.433212	1.34083	0	0.762338	0	0.970509	3.46429	0	0	1.11643	0	3.46429
PDPN	1.23128	0.300157	0.399166	0.999062	up	25.6887	20.9457	23.8755	22.1078	25.7151	31.0563	15.0119	17.8746	32.7061	14.5136	30.5563	15.0119
PRDM2	-1.12927	-0.175395	0.0942032	0.886583	down	5567.49	6288.46	5975.39	5753.37	5532.41	5008.8	6093.68	6245.79	7161.22	6149.3	5987.07	6093.68
KAZN	-1.12963	-0.175853	0.712102	0.999062	down	580.51	655.749	567.948	194.396	557.159	1002.54	822.191	176.683	546.05	531.421	1035.96	822.191
TMEM51-AS1	1.01878	0.0268385	0.972734	1	up	4.33123	4.46564	6.5115	3.04935	0	7.76407	3.46429	2.74994	9.95404	2.23286	4.92844	3.46429
TMEM51	1.62775	0.702884	0.614239	1	up	1.73635	0.994748	1.447	3.04935	2.44905	0	0	2.74994	0	2.23286	0.985688	0
C1orf195	1	0	1	1	up	0	0	0	0	0	0	0	0	0	0	0	0
FHAD1	1.30344	0.382321	0.18481	0.999062	up	64.8458	49.8149	56.433	67.0858	51.4301	84.4343	35.7976	52.9363	68.2563	39.0751	67.0268	35.7976
EFHD2	1.06319	0.0884015	0.649868	0.999062	up	38950.7	36635.7	42774	31190.3	35459.8	46378.7	30272.1	32311.1	37694.5	41550.2	47714.2	30272.1
CTRC	1.22616	0.294144	0.522417	0.999062	up	34.4154	28.2608	30.387	32.0182	30.6132	44.6434	11.5476	26.8119	62.5682	24.5615	32.5277	11.5476
CELA2A	1.01571	0.0224847	0.974074	0.999062	up	6.62772	6.57751	10.129	1.52468	6.12263	8.73458	2.30953	4.81239	11.376	7.81501	10.8426	2.30953
CELA2B	1.06321	0.0884248	0.834874	0.999062	up	17.178	16.2186	13.7465	14.4844	22.0415	18.4397	9.2381	13.0622	31.2841	16.7465	17.7424	9.2381
CASP9	1.37948	0.46413	0.0535572	0.670545	up	916.722	664.349	769.081	897.272	1260.04	740.498	495.393	605.673	809.121	870.816	709.695	495.393
DNAJC16	1.19246	0.253943	0.146509	0.999062	up	278.723	232.874	248.884	283.59	351.439	230.981	206.703	258.494	236.053	222.17	267.121	206.703
AGMAT	1.0296	0.0420868	0.840813	0.999062	up	428.406	416.491	413.842	375.833	341.643	582.305	412.25	385.679	524.72	312.601	451.445	412.25
DDI2	1.46035	0.546312	0.264434	0.999062	up	27.7646	18.7723	15.917	35.8299	37.9603	21.3512	15.0119	26.8119	9.95404	37.9586	7.8855	15.0119
RSC1A1	-1.09012	-0.124492	0.761637	0.999062	down	25.9447	28.2161	18.0875	38.1169	28.1641	19.4102	36.9524	33.6867	18.4861	32.3765	10.8426	36.9524
PLEKHM2	1.12291	0.167242	0.285424	0.999062	up	3868.23	3445.05	4601.46	3760.61	3461.74	3649.11	2852.26	3800.41	3631.8	3770.19	3763.36	2852.26
SLC25A34	1.002	0.00287642	0.991748	0.9995	up	302.606	302.133	274.207	220.316	251.028	464.874	240.191	268.806	429.446	255.663	378.504	240.191
TMEM82	-1.74308	-0.801642	0.773813	1	down	0.242627	0.466162	0	0	0	0.970509	0	1.37497	1.42201	0	0	0
FBLIM1	-1.01981	-0.0283047	0.896036	0.999062	down	819.005	835.401	759.675	677.719	704.103	1134.52	732.12	754.857	1059.39	707.817	1026.1	732.12
UQCRHL	-1.04555	-0.0642554	0.829187	0.999062	down	29.1156	30.3614	34.0045	30.4935	30.6132	21.3512	33.4881	37.8116	24.1741	33.4929	19.7138	33.4881
FLJ37453	-1.07888	-0.109539	0.578755	0.999062	down	170.252	184.269	209.815	158.566	117.555	195.072	167.441	200.745	199.081	170.814	200.095	167.441
SPEN	1.03003	0.042688	0.723861	0.999062	up	14106.2	13695.5	15691.3	15313.9	12094.6	13325.1	13697.8	15119.8	13081	12502.9	14073.7	13697.8
MIR5096	1.05901	0.0827126	0.745033	0.999062	up	287.35	271.91	238.755	273.679	268.171	368.793	274.834	193.183	428.024	204.307	256.279	274.834
ZBTB17	1.00242	0.00348899	0.981452	0.999062	up	886.911	884.731	884.841	840.859	866.965	954.981	769.072	802.294	866.001	1072.89	1029.06	769.072
C1orf64	1	0	1	1	up	0	0	0	0	0	0	0	0	0	0	0	0
HSPB7	1	0	1	1	up	0	0	0	0	0	0	0	0	0	0	0	0
CLCNKA	1	0	1	1	up	0	0	0	0	0	0	0	0	0	0	0	0
CLCNKB	1	0	1	1	up	0	0	0	0	0	0	0	0	0	0	0	0
FAM131C	1	0	1	1	up	0	0	0	0	0	0	0	0	0	0	0	0
EPHA2	-1.13673	-0.184892	0.862946	0.999062	down	6.66067	7.51204	2.894	20.5831	1.22453	1.94102	3.46429	26.1244	0	10.0479	1.97138	3.46429
ARHGEF19	-1.04903	-0.0690516	0.90969	0.999062	down	14.8083	15.4467	6.5115	24.3948	19.5924	8.73458	13.8572	18.5621	9.95404	33.4929	2.95706	13.8572
RSG1	-1.04537	-0.064015	0.895186	0.999062	down	8.65095	9.1339	8.682	13.7221	7.34716	4.85254	11.5476	10.9997	7.11003	6.69858	6.89981	11.5476
FBXO42	1.05552	0.077958	0.577368	0.999062	up	1200.18	1136.7	1151.81	1143.51	1176.77	1328.63	963.072	1157.04	1188.8	1239.24	1308.99	963.072
SZRD1	-1.0248	-0.0353399	0.796248	0.999062	down	3979.52	4077.53	3872.9	3652.36	4523.4	3869.42	3800.32	3730.29	3805.29	4994.91	4334.07	3800.32
SPATA21	1.65439	0.7263	0.455092	1	up	4.74576	2.76541	3.6175	0.762338	4.8981	9.70509	1.15476	2.06245	0	3.34929	8.87119	1.15476
NECAP2	1.12862	0.174563	0.300537	0.999062	up	1033.83	915.457	1040.39	1084.81	931.864	1078.24	909.953	996.164	645.59	905.425	1125.66	909.953
CROCCP3	-1.0976	-0.134351	0.510747	0.999062	down	376.333	413.193	344.386	318.657	326.948	515.34	367.215	386.366	514.766	360.607	482.987	367.215
RNU1-1	1	0	1	1	up	0	0	0	0	0	0	0	0	0	0	0	0
RNU1-2	1	0	1	1	up	0	0	0	0	0	0	0	0	0	0	0	0
RNU1-3	1	0	1	1	up	0	0	0	0	0	0	0	0	0	0	0	0
RNU1-28P	1	0	1	1	up	0	0	0	0	0	0	0	0	0	0	0	0
RNVU1-18	1	0	1	1	up	0	0	0	0	0	0	0	0	0	0	0	0
RNU1-27P	1	0	1	1	up	0	0	0	0	0	0	0	0	0	0	0	0
RNU1-4	1	0	1	1	up	0	0	0	0	0	0	0	0	0	0	0	0
FAM231B	1.27134	0.346348	0.584246	0.999062	up	7.45277	5.98348	2.894	9.9104	2.44905	14.5576	6.92858	3.43742	7.11003	5.58215	5.91413	6.92858
MIR3675	1	0	1	1	up	0	0	0	0	0	0	0	0	0	0	0	0
NBPF1	-1.15531	-0.208276	0.41844	0.999062	down	1120.65	1295.41	1524.41	817.989	964.927	1175.29	1613.2	830.481	1434.8	983.575	1297.17	1613.2
CROCCP2	-1.17635	-0.234318	0.610495	0.999062	down	80.5143	94.8942	114.313	105.965	64.8999	36.8793	153.583	103.81	35.5501	72.568	50.2701	153.583
MST1P2	1.52974	0.613291	0.298268	0.999062	up	7.72634	5.0822	13.023	8.38572	3.67358	5.82305	5.77381	7.56232	2.84401	5.58215	2.95706	5.77381
FAM231A	1	0	1	1	up	0	0	0	0	0	0	0	0	0	0	0	0
FAM231C	-1.61944	-0.695497	0.724303	1	down	0.36175	0.685573	1.447	0	0	0	1.15476	0.687484	0	1.11643	0	1.15476
ESPNP	2.9422	1.55689	0.625545	1	up	0.552335	0	1.447	0.762338	0	0	0	0	0	0	0	0
MST1L	-1.73419	-0.794258	0.269788	0.999062	down	7.40503	12.8745	11.576	5.33637	9.79621	2.91153	26.5595	6.87484	1.42201	8.93144	6.89981	26.5595
CROCC	1.21176	0.277109	0.549132	0.999062	up	143.44	118.301	191.004	132.647	204.496	45.6139	116.631	125.81	76.7883	226.635	47.313	116.631
MFAP2	-2.33711	-1.22472	0.704027	1	down	0	0.384921	0	0	0	0	1.15476	0	0	0	0	1.15476
ATP13A2	1.18028	0.239129	0.597024	0.999062	up	106.108	89.6362	101.29	178.387	94.2885	50.4665	72.7501	196.62	55.4582	94.8966	45.3416	72.7501
SDHB	1.14986	0.201453	0.187866	0.999062	up	1677.13	1457.78	1660.43	1519.34	2058.43	1470.32	1449.23	1381.16	1249.94	1749.45	1467.69	1449.23
PADI2	1.17033	0.226912	0.488899	0.999062	up	25869.4	22104.4	21909	26619.3	17460.5	37488.8	14234.8	24953.6	26120.8	16210.6	36871.6	14234.8
PADI1	2.34173	1.22758	0.70219	1	up	0.496716	0	0	0.762338	1.22453	0	0	0	0	0	0	0
PADI3	-2.33711	-1.22472	0.704027	1	down	0	0.328563	0	0	0	0	0	0	0	0	1.97138	0
MIR3972	1	0	1	1	up	0	0	0	0	0	0	0	0	0	0	0	0
PADI4	-1.05163	-0.0726312	0.831792	0.999062	down	6450.73	6784.04	6658.37	5722.11	3318.47	10104	5706.84	6223.79	8594.6	3882.95	10589.2	5706.84
PADI6	1.45452	0.540541	0.532583	1	up	3.78503	2.63444	2.894	2.28701	1.22453	8.73458	1.15476	2.74994	5.68802	1.11643	3.94275	1.15476
RCC2	-1.29028	-0.367687	0.510362	0.999062	down	478.101	616.84	601.229	468.076	648.999	194.102	1063.54	454.427	81.0543	703.351	335.134	1063.54
ARHGEF10L	1.51283	0.597248	0.252967	0.999062	up	21.7619	14.1638	26.7695	26.6818	12.2453	21.3512	6.92858	30.2493	11.376	7.81501	21.6851	6.92858
ACTL8	1	0	1	1	up	0	0	0	0	0	0	0	0	0	0	0	0
LOC101927876	1	0	1	1	up	0	0	0	0	0	0	0	0	0	0	0	0
IGSF21	1	0	1	1	up	0	0	0	0	0	0	0	0	0	0	0	0
KLHDC7A	1.00987	0.0141654	0.990874	1	up	1.58452	1.5087	0.7235	0	3.67358	1.94102	1.15476	0	1.42201	3.34929	1.97138	1.15476
PAX7	1	0	1	1	up	0	0	0	0	0	0	0	0	0	0	0	0
TAS1R2	1.39691	0.482236	0.881169	1	up	0.180875	0	0.7235	0	0	0	0	0	0	0	0	0
ALDH4A1	1.8419	0.881198	0.0402882	0.580605	up	29.5264	15.5782	20.258	25.9195	37.9603	33.9678	8.08334	25.4369	9.95404	21.2122	20.6994	8.08334
MIR4695	1	0	1	1	up	0	0	0	0	0	0	0	0	0	0	0	0
MIR1290	1	0	1	1	up	0	0	0	0	0	0	0	0	0	0	0	0
IFFO2	-1.02502	-0.0356511	0.948259	0.999062	down	97.4012	99.5931	61.4975	166.19	139.596	22.3217	95.8453	181.496	48.3482	139.554	36.4704	95.8453
UBR4	-1.04621	-0.0651792	0.668901	0.999062	down	8722.3	9126.14	8983.7	8563.35	8959.86	8382.28	8059.09	8645.11	12237.8	9145.8	8609.98	8059.09
EMC1	1.00252	0.00362461	0.986471	0.999062	up	438.45	437.449	463.04	433.77	290.213	566.777	456.131	482.614	365.455	352.792	511.572	456.131
MRTO4	1.1055	0.144696	0.485482	0.999062	up	200.814	182.074	219.221	186.773	165.311	231.952	168.595	184.933	236.053	127.273	206.994	168.595
AKR7L	1.9815	0.986592	0.401668	1	up	2.93548	1.42276	2.894	7.62338	1.22453	0	1.15476	4.1249	0	1.11643	0.985688	1.15476
AKR7A3	-1.16888	-0.225129	0.852227	1	down	1.7346	1.91923	0.7235	3.04935	1.22453	1.94102	0	6.87484	1.42201	2.23286	0.985688	0
LOC100506730	1.11623	0.158638	0.446513	0.999062	up	130.216	116.815	130.954	122.736	108.983	158.193	94.6906	121.685	145.045	103.828	140.953	94.6906
AKR7A2	1.03246	0.0460899	0.790762	0.999062	up	161.94	157.362	175.811	179.912	121.228	170.81	154.738	178.058	164.953	133.972	157.71	154.738
PQLC2	1.17529	0.233023	0.262501	0.999062	up	352.381	299.751	376.22	330.855	265.722	436.729	247.119	340.305	304.309	271.293	388.361	247.119
CAPZB	1.04055	0.0573507	0.662092	0.999062	up	12070.2	11600	12775.6	10301.5	12616.3	12587.5	11200	9717.59	11818.3	13067.8	12596.1	11200
MINOS1-NBL1	1	0	1	1	up	0	0	0	0	0	0	0	0	0	0	0	0
MINOS1	1.09486	0.130743	0.440086	0.999062	up	374.715	342.282	395.031	299.599	330.622	473.608	334.881	332.742	356.923	305.902	388.361	334.881
RPS14P3	1.26323	0.337118	0.443896	0.999062	up	39.0028	30.7974	36.175	61.7494	36.7358	21.3512	38.1072	45.3739	15.6421	35.7258	11.8283	38.1072
NBL1	1.58967	0.668726	0.835188	1	up	0.381169	0.114581	0	1.52468	0	0	0	0.687484	0	0	0	0
HTR6	2.5757	1.36496	0.36684	1	up	3.02993	1.1439	1.447	10.6727	0	0	1.15476	3.43742	0	1.11643	0	1.15476
TMCO4	1.5811	0.660931	0.237985	0.999062	up	44.4243	27.8142	33.281	75.4715	56.3282	12.6166	20.7857	61.8736	12.798	36.8422	13.7996	20.7857
RNF186	1	0	1	1	up	0	0	0	0	0	0	0	0	0	0	0	0
OTUD3	-1.03328	-0.0472337	0.753924	0.999062	down	336.682	348.317	342.939	340.003	308.581	355.206	345.274	358.867	405.272	264.594	370.619	345.274
PLA2G2E	1	0	1	1	up	0	0	0	0	0	0	0	0	0	0	0	0
PLA2G2A	1	0	1	1	up	0	0	0	0	0	0	0	0	0	0	0	0
PLA2G5	1	0	1	1	up	0	0	0	0	0	0	0	0	0	0	0	0
PLA2G2D	-1.64775	-0.720494	0.823031	1	down	0.180875	0.343742	0.7235	0	0	0	0	2.06245	0	0	0	0
PLA2G2F	1.39691	0.482236	0.881169	1	up	0.242627	0	0	0	0	0.970509	0	0	0	0	0	0
PLA2G2C	1.53953	0.622494	0.779953	1	up	0.562044	0.423073	0.7235	1.52468	0	0	0	0	1.42201	1.11643	0	0
UBXN10-AS1	2.64958	1.40577	0.548687	1	up	0.739343	0.114581	0	0.762338	1.22453	0.970509	0	0.687484	0	0	0	0
UBXN10	1.23983	0.310147	0.69407	0.999062	up	15.0747	11.9755	4.341	20.5831	20.8169	14.5576	1.15476	23.3745	8.53203	26.7943	10.8426	1.15476
VWA5B1	1	0	1	1	up	0	0	0	0	0	0	0	0	0	0	0	0
LINC01141	-1.40329	-0.488815	0.425348	0.999062	down	11.0444	15.7039	9.4055	9.9104	12.2453	12.6166	6.92858	12.3747	48.3482	7.81501	11.8283	6.92858
CAMK2N1	1.13196	0.178829	0.812064	0.999062	up	14.2999	12.4802	6.5115	20.5831	28.1641	1.94102	9.2381	16.4996	5.68802	31.2601	2.95706	9.2381
MUL1	1.05534	0.0777014	0.704023	0.999062	up	581.735	550.742	525.261	498.569	569.405	733.705	471.143	512.176	457.886	667.625	724.481	471.143
FAM43B	1	0	1	1	up	0	0	0	0	0	0	0	0	0	0	0	0
CDA	1.04494	0.0634259	0.825517	0.999062	up	7945.08	7603.33	7082.34	6935.75	8893.73	8868.51	4510.5	6800.59	10500.1	10433	8865.28	4510.5
PINK1	1.09733	0.133994	0.409893	0.999062	up	1262.59	1151.15	1610.51	1159.52	1004.11	1276.22	1138.6	1113.72	1019.58	1175.6	1320.82	1138.6
MIR6084	1	0	1	1	up	0	0	0	0	0	0	0	0	0	0	0	0
PINK1-AS	-1.09098	-0.125627	0.664439	0.999062	down	115.387	126.197	107.078	112.826	102.86	138.783	80.8334	126.497	210.457	137.321	121.24	80.8334
DDOST	1.05618	0.0788601	0.740594	0.999062	up	773.648	732.211	812.491	924.716	770.227	587.158	874.155	923.291	457.886	657.578	606.198	874.155
KIF17	-2.14149	-1.09861	0.384815	1	down	1.03401	2.14821	0	0	1.22453	2.91153	1.15476	0.687484	5.68802	2.23286	1.97138	1.15476
SH2D5	1.35425	0.437492	0.67149	1	up	3.3651	2.44836	3.6175	3.04935	0	6.79356	1.15476	6.18736	2.84401	3.34929	0	1.15476
HP1BP3	-1.02982	-0.0423925	0.758202	0.999062	down	4578.65	4715.61	4918.35	4649.5	4961.78	3784.98	5221.84	4509.9	4840.51	4494.75	4004.85	5221.84
EIF4G3	-1.0106	-0.0152141	0.88121	0.999062	down	2580.5	2607.66	2271.07	2679.62	2584.97	2786.33	2530.09	2550.57	2775.75	2515.32	2744.15	2530.09
MIR1256	1	0	1	1	up	0	0	0	0	0	0	0	0	0	0	0	0
ECE1	1.07131	0.0993775	0.741871	0.999062	up	26452.9	24692.2	28210	18255	28393.1	30953.4	15677.1	18115.9	35850.2	30580.1	32252.7	15677.1
LOC100506801	-1.255	-0.327685	0.363413	0.999062	down	137.937	173.212	117.207	76.2338	150.617	207.689	131.643	97.6227	295.777	203.19	179.395	131.643
NBPF3	-1.13054	-0.177011	0.584755	0.999062	down	144.07	163.278	175.087	103.678	110.207	187.308	228.643	85.9355	146.467	119.458	170.524	228.643
ALPL	1.10666	0.146214	0.770666	0.999062	up	48713.5	44018.3	35080.3	23019.6	63148.8	73605.3	17306.4	21929.4	63695.9	66851.9	77019.7	17306.4
RAP1GAP	1.15691	0.210275	0.710274	0.999062	up	142.081	122.811	109.972	55.6507	97.9621	304.74	56.5834	49.4988	156.421	141.787	275.993	56.5834
USP48	-1.21344	-0.279106	0.261387	0.999062	down	1641.76	1992.38	1512.12	1892.12	1609.03	1553.78	2829.17	1717.34	1510.17	1565.24	1503.17	2829.17
LDLRAD2	5.19376	2.37678	0.448545	1	up	1.00497	0	0	3.04935	0	0.970509	0	0	0	0	0	0
HSPG2	1.0573	0.080389	0.934263	0.999062	up	11.1737	10.463	1.447	32.7805	3.67358	6.79356	4.61905	37.1241	4.26602	11.1643	0.985688	4.61905
CELA3B	1	0	1	1	up	0	0	0	0	0	0	0	0	0	0	0	0
CELA3A	1	0	1	1	up	0	0	0	0	0	0	0	0	0	0	0	0
LOC101928043	-1.45983	-0.545799	0.665458	1	down	1.4708	2.10779	1.447	1.52468	0	2.91153	1.15476	3.43742	0	0	6.89981	1.15476
LINC00339	-1.04057	-0.0573783	0.838528	0.999062	down	48.9781	51.1929	56.433	57.1754	31.8377	50.4665	63.512	60.4986	35.5501	44.6572	39.4275	63.512
CDC42	-1.07621	-0.105965	0.473395	0.999062	down	18059.7	19436.1	17278.6	15270.4	19676.9	20012.9	18815.7	15462.2	21520.6	20311.2	21691	18815.7
WNT4	-1.39098	-0.476098	0.245725	0.999062	down	42.2874	59.2645	62.221	28.9689	34.2867	43.6729	33.4881	50.1863	119.448	48.0065	70.9695	33.4881
MIR4418	1	0	1	1	up	0	0	0	0	0	0	0	0	0	0	0	0
ZBTB40	-1.08301	-0.115047	0.805773	0.999062	down	381.273	412.858	410.225	557.269	395.522	162.075	573.917	601.549	157.843	430.942	138.982	573.917
EPHA8	1	0	1	1	up	0	0	0	0	0	0	0	0	0	0	0	0
MIR6127	1	0	1	1	up	0	0	0	0	0	0	0	0	0	0	0	0
C1QA	1.65558	0.72734	0.597363	1	up	4.50504	2.64431	0	11.4351	3.67358	2.91153	3.46429	8.93729	0	0	0	3.46429
C1QC	-1.05375	-0.0755277	0.973417	1	down	0.496716	0.466162	0	0.762338	1.22453	0	0	1.37497	1.42201	0	0	0
C1QB	1.1487	0.199998	0.93468	1	up	1.14351	0.966346	0	4.57403	0	0	0	4.81239	0	0	0.985688	0
EPHB2	-1.17341	-0.230703	0.800671	1	down	2.14839	2.66049	2.1705	2.28701	1.22453	2.91153	3.46429	1.37497	5.68802	0	1.97138	3.46429
MIR4684	1	0	1	1	up	0	0	0	0	0	0	0	0	0	0	0	0
MIR4253	1	0	1	1	up	0	0	0	0	0	0	0	0	0	0	0	0
LACTBL1	1	0	1	1	up	0	0	0	0	0	0	0	0	0	0	0	0
C1orf234	1	0	1	1	up	0	0	0	0	0	0	0	0	0	0	0	0
KDM1A	-1.13327	-0.180489	0.689713	0.999062	down	115.215	130.617	146.147	154.755	111.432	48.5254	189.381	164.996	52.6142	135.088	52.2415	189.381
MIR3115	1.39691	0.482236	0.881169	1	up	0.180875	0	0.7235	0	0	0	0	0	0	0	0	0
MIR4419A	-1.64717	-0.719993	0.823388	1	down	0	0.114581	0	0	0	0	0	0.687484	0	0	0	0
LUZP1	-1.12381	-0.168404	0.603883	0.999062	down	376.731	423.237	295.188	455.116	559.608	197.013	474.608	383.616	439.4	541.469	225.723	474.608
HTR1D	-1.05174	-0.0727773	0.85553	0.999062	down	22.4974	23.8412	18.0875	19.0585	20.8169	32.0268	16.1667	22.687	48.3482	18.9793	20.6994	16.1667
LINC01355	3.74083	1.90336	0.00652331	0.175112	up	55.8609	14.8653	35.4515	59.4624	123.677	4.85254	21.9405	20.6245	12.798	8.93144	2.95706	21.9405
HNRNPR	1.24401	0.314996	0.36968	0.999062	up	1376.81	1106.44	970.937	1386.69	2406.19	743.41	1405.35	1039.48	898.707	1289.48	600.284	1405.35
ZNF436	1.93075	0.949158	8.8509e-07	9.10264e-05	up	211.547	109.462	218.497	211.93	249.803	165.957	125.869	109.997	95.2744	114.992	84.7692	125.869
ZNF436-AS1	1.23501	0.304517	0.727777	1	up	4.42387	3.68548	2.1705	9.9104	3.67358	1.94102	6.92858	2.06245	2.84401	3.34929	0	6.92858
TCEA3	-1.7482	-0.805871	0.30202	0.999062	down	6.92614	12.2744	5.0645	16.7714	4.8981	0.970509	19.631	15.1246	7.11003	11.1643	0.985688	19.631
ASAP3	1.16565	0.221129	0.869656	1	up	1.55372	1.23669	0	3.04935	1.22453	1.94102	1.15476	4.1249	0	0	0.985688	1.15476
E2F2	1.0714	0.0994948	0.676913	0.999062	up	131.713	123.404	144.7	128.073	83.2678	170.81	132.798	122.372	136.513	84.8487	131.096	132.798
LOC101928163	1.13195	0.178815	0.495375	0.999062	up	53.78	47.3535	47.751	53.3637	48.981	65.0241	38.1072	54.9987	58.3022	33.4929	61.1126	38.1072
ID3	8.97668	3.16618	4.1718e-11	8.69381e-09	up	372.347	41.3952	479.681	558.032	198.373	253.303	19.631	48.1239	51.1922	20.0958	89.6976	19.631
MDS2	-1.01325	-0.018995	0.949185	0.999062	down	37.5495	38.1746	34.0045	37.3546	24.4905	54.3485	35.7976	43.999	48.3482	25.6779	39.4275	35.7976
RPL11	1.09199	0.126955	0.710678	0.999062	up	2702.21	2474.32	2317.37	3836.85	3242.55	1412.09	2784.13	3398.92	1478.89	3011.01	1388.83	2784.13
TCEB3	-1.11355	-0.155164	0.541975	0.999062	down	349.442	388.921	298.082	397.178	350.214	352.295	523.108	378.804	217.567	361.724	329.22	523.108
TCEB3-AS1	-1.05642	-0.0791872	0.922854	1	down	2.59664	2.81688	3.6175	4.57403	1.22453	0.970509	2.30953	3.43742	1.42201	4.46572	2.95706	2.30953
PITHD1	-1.11148	-0.152477	0.363979	0.999062	down	533.278	593.186	621.487	537.448	551.037	423.142	695.167	543.8	528.986	571.612	524.386	695.167
LYPLA2	1.23945	0.309705	0.156536	0.999062	up	1185.85	956.665	1415.17	1167.14	836.351	1324.74	769.072	1170.1	880.221	915.473	1236.05	769.072
GALE	-1.01309	-0.0187682	0.930649	0.999062	down	68.2324	68.611	70.903	52.6013	74.6961	74.7292	71.5953	65.311	49.7702	72.568	80.8264	71.5953
HMGCL	-1.04147	-0.058619	0.748017	0.999062	down	116.433	121.83	141.806	104.44	94.2885	125.196	129.333	127.872	127.98	106.061	110.397	129.333
FUCA1	1.13593	0.183879	0.647501	0.999062	up	219.519	193.489	374.05	134.934	188.577	180.515	306.012	112.06	96.6964	177.512	162.638	306.012
CNR2	1.25422	0.326791	0.655922	0.999062	up	156.51	124.897	373.326	53.3637	146.943	52.4075	242.5	43.999	11.376	151.835	57.1699	242.5
MIR378F	1	0	1	1	up	0	0	0	0	0	0	0	0	0	0	0	0
PNRC2	-1.29951	-0.377972	0.162559	0.999062	down	1876.02	2437.94	1804.41	2075.85	2315.58	1308.25	3276.06	2120.89	2172.82	2388.04	1393.76	3276.06
SRSF10	-1.09113	-0.125823	0.52031	0.999062	down	1197.94	1306.92	1045.46	1313.51	1406.98	1025.83	1625.91	1217.53	1136.18	1232.54	1003.43	1625.91
MYOM3	1.05508	0.0773476	0.809412	0.999062	up	40.4193	38.2875	40.516	31.2559	40.4094	49.4959	34.6429	43.3115	56.8802	17.8629	42.3846	34.6429
IL22RA1	-2.23278	-1.15884	0.71932	1	down	0	0.229161	0	0	0	0	0	1.37497	0	0	0	0
IFNLR1	1.00147	0.00211201	0.993197	0.9995	up	418.679	418.566	451.464	384.219	315.928	523.104	309.476	408.366	619.994	384.052	480.03	309.476
LOC284632	-1.0951	-0.131059	0.863414	0.999062	down	4.40977	5.09238	7.9585	4.57403	1.22453	3.88203	9.2381	1.37497	4.26602	4.46572	1.97138	9.2381
GRHL3	2.3205	1.21444	0.506918	1	up	1.147	0.515863	3.6175	0	0	0.970509	0	0.687484	1.42201	0	0.985688	0
STPG1	1.45107	0.537122	0.189049	0.999062	up	15.4523	10.479	18.811	8.38572	17.1434	17.4692	10.3929	10.9997	7.11003	11.1643	12.8139	10.3929
NIPAL3	1.18274	0.24213	0.562757	0.999062	up	200.791	169.644	199.686	314.846	198.373	90.2573	188.226	275.681	100.962	198.725	66.0411	188.226
RCAN3AS	1.88004	0.910762	0.64612	1	up	1.42051	0.687484	2.1705	2.28701	1.22453	0	0	4.1249	0	0	0	0
RCAN3	1.11659	0.159103	0.802005	0.999062	up	216.888	194.15	196.792	407.851	224.088	38.8203	224.024	386.366	93.8524	211.005	25.6279	224.024
LOC100506985	1.20134	0.264643	0.685388	0.999062	up	31.0759	25.7418	23.8755	48.7897	47.7565	3.88203	16.1667	49.4988	29.8621	36.8422	5.91413	16.1667
NCMAP	1.02843	0.0404435	0.849838	0.999062	up	306.534	298.208	287.953	295.025	255.926	387.233	248.274	276.369	348.391	257.895	410.046	248.274
SRRM1	-1.04197	-0.0593104	0.710736	0.999062	down	2966.96	3090.67	2438.92	2672	3416.43	3340.49	3152.5	2742.37	2735.94	3761.25	2999.45	3152.5
CLIC4	1.06784	0.0947005	0.799326	0.999062	up	342.409	320.164	219.221	237.087	608.59	304.74	326.798	202.808	183.439	538.12	343.019	326.798
RUNX3	1.28782	0.364936	0.432864	0.999062	up	2816.87	2187.13	3367.17	3993.89	2985.39	921.013	2273.73	3625.1	841.827	3114.84	993.573	2273.73
MIR6731	1.00093	0.001343	0.999668	1	up	0.190585	0.186072	0	0.762338	0	0	0	0	0	1.11643	0	0
MIR4425	1.02009	0.0287029	0.98841	1	up	1.12409	1.15476	1.447	3.04935	0	0	3.46429	0	0	0	0	3.46429
SYF2	-1.40179	-0.487269	0.0709728	0.780025	down	1724.05	2416.5	1359.46	1558.22	2364.56	1613.96	3191.76	1471.9	2369.06	2529.83	1744.67	3191.76
RSRP1	-1.30343	-0.382314	0.232642	0.999062	down	3501.93	4564.67	4152.89	4070.89	4274.82	1509.14	5008.21	4833.7	4733.86	5406.87	2397.19	5008.21
RHD	-1.25314	-0.32555	0.102802	0.913302	down	526.948	661.053	559.989	438.345	487.361	622.096	610.87	552.737	949.9	580.544	661.397	610.87
TMEM50A	1.04156	0.0587444	0.671545	0.999062	up	6624.81	6359.73	6185.93	5966.82	7557.78	6788.71	6101.77	5627.74	5797.52	7554.89	6974.73	6101.77
RHCE	-1.13259	-0.179631	0.619557	0.999062	down	42.9231	48.7691	60.0505	22.8701	48.981	39.7909	38.1072	35.7492	59.7242	81.4994	39.4275	38.1072
TMEM57	-1.18756	-0.248001	0.358705	0.999062	down	478.442	568.036	477.51	458.928	655.122	322.209	703.251	479.176	513.344	672.091	337.105	703.251
LDLRAP1	1.43568	0.521738	0.394018	0.999062	up	245.621	170.79	221.391	496.282	167.76	97.0509	93.5358	505.988	46.9262	184.211	100.54	93.5358
MAN1C1	1.03752	0.0531456	0.811746	0.999062	up	126.659	121.873	132.401	150.943	112.656	110.638	122.405	173.246	115.182	91.5473	106.454	122.405
SEPN1	1.06568	0.0917771	0.744913	0.999062	up	546.706	513.185	711.924	654.086	391.848	428.965	652.441	624.923	308.575	428.709	412.018	652.441
MTFR1L	-1.09903	-0.136231	0.691536	0.999062	down	253.481	278.748	311.829	240.137	182.454	279.507	427.262	246.807	123.714	209.889	237.551	427.262
LOC646471	-1.04415	-0.0623271	0.789678	0.999062	down	233.615	244.526	275.654	211.93	151.841	295.035	295.619	220.682	233.209	186.444	235.579	295.619
AUNIP	1.01186	0.0170149	0.950492	0.999062	up	44.9678	44.7557	48.4745	39.6416	30.6132	61.142	54.2739	37.8116	41.2382	34.6093	46.3273	54.2739
PAQR7	-1.04658	-0.0656764	0.762237	0.999062	down	327.158	342.883	348.727	295.025	243.681	421.201	369.524	307.993	382.519	234.45	393.289	369.524
STMN1	-1.02321	-0.0331076	0.883893	0.999062	down	194.311	198.754	167.852	238.612	187.353	183.426	245.964	230.307	173.485	144.02	152.782	245.964
MIR3917	1	0	1	1	up	0	0	0	0	0	0	0	0	0	0	0	0
PAFAH2	-1.07814	-0.108544	0.613209	0.999062	down	359.58	387.739	374.773	309.509	360.011	394.027	486.155	323.117	292.933	444.339	293.735	486.155
EXTL1	-1.64717	-0.719993	0.823388	1	down	0	0.114581	0	0	0	0	0	0.687484	0	0	0	0
SLC30A2	1	0	1	1	up	0	0	0	0	0	0	0	0	0	0	0	0
TRIM63	1	0	1	1	up	0	0	0	0	0	0	0	0	0	0	0	0
PDIK1L	-1.14444	-0.194644	0.801002	0.999062	down	41.3749	47.2918	49.198	48.7897	58.7773	8.73458	90.0715	59.1236	2.84401	35.7258	5.91413	90.0715
FAM110D	1	0	1	1	up	0	0	0	0	0	0	0	0	0	0	0	0
ZNF593	1.45136	0.537406	0.513155	0.999062	up	10.4322	7.04311	5.0645	19.0585	14.6943	2.91153	1.15476	15.1246	4.26602	15.63	4.92844	1.15476
CNKSR1	-1.50833	-0.592954	0.503205	1	down	2.73161	4.03059	2.1705	5.33637	2.44905	0.970509	4.61905	9.62478	0	3.34929	1.97138	4.61905
CATSPER4	1	0	1	1	up	0	0	0	0	0	0	0	0	0	0	0	0
LOC101928303	1.09288	0.12814	0.604401	0.999062	up	175.786	161.272	191.004	163.903	111.432	236.804	143.191	167.059	209.035	122.807	182.352	143.191
CEP85	-1.28938	-0.366676	0.456269	0.999062	down	76.8374	99.2121	107.802	80.8079	62.4508	56.2895	173.214	91.4354	22.7521	89.3144	45.3416	173.214
SH3BGRL3	1.09361	0.129096	0.475258	0.999062	up	17870.6	16341.4	20975.7	16099.1	16932.7	17475	12849	15938.6	20243.7	18714.7	17453.6	12849
UBXN11	1.26657	0.340927	0.238354	0.999062	up	184.623	145.64	232.244	234.8	124.902	146.547	112.012	226.182	126.558	129.506	167.567	112.012
CD52	1.09378	0.129324	0.797423	0.999062	up	718.982	657.237	876.882	858.393	815.534	325.12	963.072	836.668	120.87	766.988	292.749	963.072
AIM1L	1.6494	0.721946	0.25569	0.999062	up	16.9374	10.0692	23.8755	16.7714	18.3679	8.73458	8.08334	22.687	2.84401	16.7465	1.97138	8.08334
ZNF683	1.78132	0.832948	0.575669	0.999062	up	25.8684	14.4403	8.682	41.1663	52.6546	0.970509	4.61905	40.5616	0	36.8422	0	4.61905
LIN28A	1.05198	0.0731111	0.813893	0.999062	up	280.725	267.14	313.276	224.127	160.413	425.083	199.774	248.869	354.079	227.752	372.59	199.774
DHDDS	-1.07652	-0.106381	0.427644	0.999062	down	226.14	243.287	201.133	246.998	240.007	216.423	239.036	230.995	237.475	274.642	238.536	239.036
LOC101928324	1.02849	0.0405337	0.924672	0.999062	up	17.0441	17.0412	18.0875	20.5831	15.9188	13.5871	20.7857	8.93729	29.8621	10.0479	11.8283	20.7857
HMGN2	-1.0388	-0.0549217	0.762539	0.999062	down	6082.07	6317.83	5904.48	5593.28	6874.49	5956.01	7781.95	5132.07	4861.84	6392.68	5956.51	7781.95
RPS6KA1	1.05572	0.0782313	0.744305	0.999062	up	12282.4	11634.2	13109.8	9410.3	9769.27	16840.3	9523.33	9927.27	12653	11494.8	16683.8	9523.33
MIR1976	-1.61375	-0.690415	0.504075	1	down	1.5881	2.6156	2.1705	0.762338	2.44905	0.970509	1.15476	2.74994	8.53203	1.11643	0.985688	1.15476
ARID1A	1.08435	0.116836	0.322529	0.999062	up	14139.7	13040.1	16121.8	13507.9	12377.5	14551.8	12374.4	13415.6	12297.5	13188.4	14590.2	12374.4
PIGV	1.02287	0.0326279	0.893528	0.999062	up	182.188	178.208	221.391	215.742	128.575	163.045	167.441	263.994	172.063	148.485	149.825	167.441
ZDHHC18	1.13428	0.181777	0.348874	0.999062	up	48995.3	43195.2	52866.9	43667.5	44898.5	54548.4	32961.6	41810	49475.8	45885.3	56076.8	32961.6
SFN	1.08865	0.12254	0.746162	0.999062	up	284.694	261.476	239.479	196.683	257.151	445.464	145.5	186.308	332.749	301.436	457.359	145.5
GPN2	1.11976	0.163186	0.497521	0.999062	up	174.248	155.101	198.239	163.903	159.188	175.662	142.036	187.683	85.3203	176.396	197.138	142.036
GPATCH3	-1.18538	-0.245346	0.158228	0.999062	down	179.512	212.797	183.769	192.872	186.128	155.281	233.262	226.87	189.127	235.567	158.696	233.262
NR0B2	1	0	1	1	up	0	0	0	0	0	0	0	0	0	0	0	0
NUDC	-1.11165	-0.152702	0.455119	0.999062	down	718.108	798.076	712.648	680.768	804.514	674.504	1032.36	698.484	575.912	769.221	680.125	1032.36
KDF1	-1.56592	-0.647011	0.645239	1	down	0.677591	1.03593	0.7235	0.762338	1.22453	0	1.15476	0.687484	0	2.23286	0.985688	1.15476
TRNP1	1.26587	0.340128	0.6987	1	up	3.05532	2.42769	2.1705	1.52468	3.67358	4.85254	4.61905	0.687484	1.42201	2.23286	0.985688	4.61905
FAM46B	1.20448	0.268414	0.624054	0.999062	up	7.19423	5.86056	5.788	8.38572	4.8981	9.70509	6.92858	8.93729	2.84401	5.58215	3.94275	6.92858
SLC9A1	1.03839	0.0543493	0.818596	0.999062	up	4746.51	4571.52	6047.01	4093.76	4023.79	4821.49	3258.74	4490.65	6326.5	4663.33	5431.14	3258.74
WDTC1	1.1603	0.214495	0.279556	0.999062	up	8256.16	7115.32	8488.1	8304.91	6923.47	9308.15	5493.21	8001.63	6892.46	7158.55	9652.84	5493.21
TMEM222	1.10796	0.147902	0.49363	0.999062	up	786.627	709.969	1012.18	644.938	615.937	873.458	617.798	730.796	563.114	811.645	918.661	617.798
ACTG1P20	-1.095	-0.130928	0.54595	0.999062	down	212.913	233.324	204.027	168.477	204.496	274.654	198.619	193.183	307.153	224.403	277.964	198.619
RNU6-48P	1	0	1	1	up	0	0	0	0	0	0	0	0	0	0	0	0
SYTL1	1.2742	0.349593	0.141356	0.998129	up	1722.06	1351.5	2509.1	1410.33	1253.91	1714.89	1316.43	1478.09	982.606	1272.73	1742.7	1316.43
MAP3K6	1.35972	0.443312	0.249586	0.999062	up	91.9228	67.9572	180.875	86.1442	50.2056	50.4665	79.6786	78.3732	68.2563	52.4722	49.2844	79.6786
FCN3	2.71652	1.44176	0.648594	1	up	0.7235	0.164281	2.894	0	0	0	0	0	0	0	0.985688	0
CD164L2	1.82417	0.86724	0.471386	1	up	1.82284	1.03715	3.6175	0.762338	0	2.91153	1.15476	1.37497	1.42201	1.11643	0	1.15476
GPR3	1.2978	0.376071	1	1	up	22.6217	17.3544	9.4055	4.57403	8.57168	67.9356	5.77381	10.3123	15.6421	13.3972	53.2271	5.77381
WASF2	1.12158	0.165528	0.19632	0.999062	up	17944.8	15999.6	19586.6	18126.9	15865	18200.9	14364.1	17279.9	15168.5	16164.8	18656.1	14364.1
AHDC1	1.15301	0.205407	0.641567	0.999062	up	168.127	145.634	163.511	176.1	262.049	70.8471	79.6786	186.996	164.953	275.758	86.7405	79.6786
FGR	-1.06837	-0.0954048	0.690242	0.999062	down	31075.7	33200.7	37475.1	26547.7	29552.7	30727.3	23918.6	30286.4	49996.3	38404.1	32680.5	23918.6
IFI6	1.62637	0.701657	0.103804	0.916535	up	3473.88	2135.9	3079.94	3300.92	6156.92	1357.74	2376.5	1583.96	1710.67	3855.03	912.747	2376.5
FAM76A	-1.05864	-0.082211	0.582902	0.999062	down	184.945	195.493	173.64	200.495	209.394	156.252	211.322	188.371	180.595	184.211	197.138	211.322
STX12	1.62753	0.702685	0.000535095	0.0248529	up	1845.78	1133.98	1501.99	2068.99	2292.31	1519.82	960.763	1040.16	1343.8	1049.44	1448.96	960.763
PPP1R8	1.01977	0.0282449	0.891744	0.999062	up	370.483	363.243	369.709	394.891	431.033	286.3	443.429	336.867	292.933	390.751	272.05	443.429
SCARNA1	4.76303	2.25188	0.194505	1	up	1.29168	0.114581	1.447	1.52468	1.22453	0.970509	0	0.687484	0	0	0	0
THEMIS2	-1.0193	-0.027572	0.922634	0.999062	down	31530	32138.4	30562.8	24552.6	38467.3	32537.3	20800.7	25933.3	48669.6	41906.3	34719.9	20800.7
RPA2	-1.18296	-0.242403	0.202044	0.999062	down	3498.39	4138.37	3692.74	2893.07	2932.74	4475.02	4600.58	3983.28	3344.56	3474.33	4826.91	4600.58
SMPDL3B	-1.13431	-0.181809	0.521338	0.999062	down	269.876	306.062	344.386	145.607	357.562	231.952	259.822	233.745	373.987	389.634	319.363	259.822
XKR8	-1.11183	-0.152934	0.488665	0.999062	down	4922.11	5472.2	4882.18	4148.65	4638.51	6019.1	3964.3	5677.24	5359.54	6911.82	6956	3964.3
EYA3	-1.01985	-0.0283629	0.867702	0.999062	down	1805.7	1841.57	1783.43	1777.77	2100.06	1561.55	1549.69	1879.58	2363.37	2010.69	1696.37	1549.69
PTAFR	1.36547	0.449394	0.0207627	0.39241	up	40313.8	29523.7	40809	36076.9	37274.6	47094.9	26074.5	27804.6	29208	24758	43222.4	26074.5
DNAJC8	-1.26089	-0.334443	0.32969	0.999062	down	852.954	1075.28	751.717	808.841	1279.63	571.63	1471.17	745.233	810.543	1413.4	540.157	1471.17
ATPIF1	1.00116	0.00166783	0.995332	0.999565	up	722.804	721.696	751.717	676.956	963.702	498.841	866.072	708.796	489.17	971.295	428.774	866.072
SESN2	1.80516	0.852127	0.0492848	0.641391	up	3502.41	1939.99	2638.6	2059.84	3509.49	5801.7	1264.47	1297.28	1119.12	2346.74	4347.87	1264.47
MED18	1.19785	0.260449	0.381498	0.999062	up	782.359	653.161	607.017	517.628	882.883	1121.91	500.012	453.739	945.634	695.536	824.035	500.012
PHACTR4	-1.10343	-0.141991	0.386926	0.999062	down	938.929	1036.45	973.831	926.241	968.6	887.045	1215.97	980.352	1057.97	1000.32	748.137	1215.97
SNHG3	1.13854	0.187191	0.19309	0.999062	up	277.002	242.942	312.552	264.531	266.947	263.978	249.429	258.494	191.971	250.08	258.25	249.429
RCC1	-1.01326	-0.0190009	0.939042	0.999062	down	105.419	106.596	96.949	112.064	117.555	95.1099	71.5953	114.81	118.026	146.252	117.297	71.5953
SNORA73A	-2.33888	-1.22582	1	1	down	7.73678	17.813	7.9585	7.62338	8.57168	6.79356	2.30953	92.1229	2.84401	3.34929	3.94275	2.30953
SNORA73B	-1.56739	-0.648362	1	1	down	3.52211	5.39974	8.682	0.762338	3.67358	0.970509	0	28.8743	1.42201	1.11643	0.985688	0
TRNAU1AP	-1.02304	-0.0328696	0.903002	0.999062	down	71.1723	73.0485	101.29	74.7092	51.4301	57.26	80.8334	86.623	46.9262	77.0337	66.0411	80.8334
SNHG12	-1.09799	-0.134864	0.768765	0.999062	down	56.1246	61.6441	73.797	73.9468	61.2263	15.5281	83.1429	83.1856	36.9721	55.8215	27.5993	83.1429
SNORD99	1.01196	0.0171489	0.985788	1	up	2.13686	2.02338	2.1705	0.762338	3.67358	1.94102	2.30953	2.74994	1.42201	3.34929	0	2.30953
SNORA61	-1.34251	-0.424928	0.683165	1	down	1.8519	2.41985	1.447	2.28701	3.67358	0	4.61905	2.06245	0	2.23286	0.985688	4.61905
SNORA44	-1.03662	-0.0518807	0.951417	0.999062	down	5.09891	5.33012	6.5115	11.4351	2.44905	0	3.46429	10.9997	4.26602	7.81501	1.97138	3.46429
SNORA16A	1.13107	0.177692	0.843358	0.999062	up	5.607	4.93309	8.682	7.62338	6.12263	0	5.77381	9.62478	2.84401	5.58215	0	5.77381
RAB42	1.03582	0.0507769	0.857316	0.999062	up	261.028	252.101	254.672	230.226	230.211	329.002	168.595	272.244	382.519	195.375	325.277	168.595
TAF12	1.01857	0.0265471	0.805908	0.999062	up	1272.41	1249.59	1350.05	1181.62	1299.22	1258.75	1285.25	1095.16	1190.22	1355.35	1286.32	1285.25
RNU11	-2.96435	-1.56772	0.34122	1	down	0.37146	1.30627	0.7235	0.762338	0	0	2.30953	0	0	2.23286	0.985688	2.30953
GMEB1	-1.04714	-0.0664602	0.659191	0.999062	down	634.533	664.829	629.445	537.448	668.591	702.648	658.215	547.237	772.149	739.077	614.084	658.215
YTHDF2	-1.09276	-0.127979	0.615889	0.999062	down	528.536	577.727	562.883	551.171	493.484	506.606	816.417	509.426	368.299	519.14	436.66	816.417
OPRD1	1	0	1	1	up	0	0	0	0	0	0	0	0	0	0	0	0
EPB41	1.09547	0.131551	0.401027	0.999062	up	14070.3	12843.9	15822.9	13392.8	16183.3	10882.3	12877.9	13036.8	11998.9	15036.1	11235.9	12877.9
TMEM200B	1.56178	0.643192	0.215884	0.999062	up	9.66014	6.23208	7.9585	10.6727	12.2453	7.76407	9.2381	5.49987	7.11003	3.34929	2.95706	9.2381
SRSF4	-1.02375	-0.0338688	0.711206	0.999062	down	2296.4	2352.01	2261.66	2388.41	2097.61	2437.92	2418.07	2228.82	2295.12	2457.26	2294.68	2418.07
MECR	-1.08363	-0.115872	0.777026	0.999062	down	15.4852	16.744	15.917	18.2961	7.34716	20.3807	17.3214	26.8119	12.798	13.3972	12.8139	17.3214
PTPRU	-1.90556	-0.930215	0.596683	1	down	0.85489	1.52691	0	0	2.44905	0.970509	3.46429	0	0	2.23286	0	3.46429
LOC101928460	1	0	1	1	up	0	0	0	0	0	0	0	0	0	0	0	0
LOC101929406	1	0	1	1	up	0	0	0	0	0	0	0	0	0	0	0	0
MATN1	-1.11345	-0.155032	0.758896	0.999062	down	13.4629	14.8539	10.8525	10.6727	6.12263	26.2037	11.5476	16.4996	8.53203	13.3972	27.5993	11.5476
MATN1-AS1	-1.75294	-0.809774	0.0237742	0.426427	down	20.9537	37.2633	22.4285	28.9689	15.9188	16.4986	53.1191	25.4369	24.1741	31.2601	36.4704	53.1191
LAPTM5	-1.01755	-0.0251033	0.899496	0.999062	down	134367	136726	147221	118495	128929	142822	106064	125063	183934	134872	164359	106064
MIR4420	-1.33899	-0.421141	0.427893	0.999062	down	39.3658	52.6991	27.493	20.5831	22.0415	87.3458	36.9524	26.8119	65.4122	35.7258	114.34	36.9524
SDC3	1.61935	0.695417	0.35548	1	up	5.15781	3.00123	2.1705	4.57403	6.12263	7.76407	2.30953	4.1249	0	3.34929	5.91413	2.30953
PUM1	1.02411	0.034366	0.840709	0.999062	up	1692.18	1652.6	1928.85	1932.53	1504.94	1402.39	1848.78	1885.77	1382.19	1522.81	1427.28	1848.78
SNORD103A	1	0	1	1	up	0	0	0	0	0	0	0	0	0	0	0	0
SNORD103B	1	0	1	1	up	0	0	0	0	0	0	0	0	0	0	0	0
SNORD85	1.39691	0.482236	0.881169	1	up	0.180875	0	0.7235	0	0	0	0	0	0	0	0	0
NKAIN1	1.39691	0.482236	0.881169	1	up	0.242627	0	0	0	0	0.970509	0	0	0	0	0	0
SNRNP40	-1.1241	-0.16877	0.537417	0.999062	down	129.49	145.258	114.313	154.755	151.841	97.0509	180.143	170.496	98.1184	152.951	89.6976	180.143
ZCCHC17	-1.07862	-0.109181	0.656688	0.999062	down	198.237	213.446	151.212	204.307	284.09	153.34	242.5	170.496	196.237	262.361	166.581	242.5
FABP3	-1.25536	-0.328101	0.64196	0.999062	down	4.36029	5.74813	4.341	4.57403	3.67358	4.85254	4.61905	1.37497	14.2201	6.69858	2.95706	4.61905
SERINC2	-1.13396	-0.181367	0.648901	0.999062	down	50.9277	57.5843	31.834	36.5922	67.3489	67.9356	32.3334	39.8741	88.1643	75.9173	76.8837	32.3334
LINC01225	1.00093	0.001343	0.999668	1	up	0.190585	0.114581	0	0.762338	0	0	0	0.687484	0	0	0	0
LINC01226	-1.31748	-0.397781	0.147017	0.999062	down	84.0138	110.821	73.0735	58.7	77.1452	127.137	113.167	80.4356	149.311	91.5473	117.297	113.167
TINAGL1	-1.30256	-0.381349	0.420837	0.999062	down	36.9023	47.9567	17.364	24.3948	33.0622	72.7882	50.8096	19.2496	48.3482	35.7258	82.7978	50.8096
HCRTR1	4.38409	2.13228	0.0680894	1	up	6.76795	1.52457	1.447	2.28701	4.8981	18.4397	0	1.37497	2.84401	0	4.92844	0
PEF1	1.40223	0.487719	0.0316015	0.508964	up	1417.43	1010.63	1309.54	1392.03	1755.97	1212.17	711.334	989.29	1188.8	1243.7	1219.3	711.334
COL16A1	-3.41644	-1.7725	0.422007	1	down	0.180875	0.943136	0.7235	0	0	0	1.15476	0	0	3.34929	0	1.15476
ADGRB2	-1.02203	-0.0314334	0.97903	1	down	3.6984	3.60543	0.7235	3.04935	11.0207	0	1.15476	6.18736	0	11.1643	1.97138	1.15476
MIR4254	1	0	1	1	up	0	0	0	0	0	0	0	0	0	0	0	0
SPOCD1	1.43371	0.519755	1	1	up	6.30831	4.38589	0	0	0	25.2332	0	0.687484	0	0	25.6279	0
PTP4A2	-1.26392	-0.337908	0.0628408	0.731818	down	9447.87	11941.9	10480.6	7483.88	9934.58	9892.4	13694.3	8393.49	12765.3	11759.4	11344.3	13694.3
KHDRBS1	-1.05913	-0.0828778	0.543216	0.999062	down	2838.03	3006.04	2954.77	2578.99	2990.29	2828.06	3438.88	2525.82	2734.52	3086.93	2811.18	3438.88
TMEM39B	1.3461	0.428789	0.0353821	0.537794	up	159.474	118.431	201.133	155.517	134.698	146.547	97.0001	148.497	119.448	128.39	120.254	97.0001
MIR5585	1	0	1	1	up	0	0	0	0	0	0	0	0	0	0	0	0
KPNA6	1.02012	0.0287459	0.764382	0.999062	up	1839.34	1802.01	1800.07	1750.33	1921.28	1885.7	1694.04	1827.33	1737.69	1969.38	1889.56	1694.04
TXLNA	1.9882	0.991466	9.66083e-08	1.24397e-05	up	1162.72	583.969	989.025	1398.13	1200.04	1063.68	532.346	722.546	459.308	551.517	705.752	532.346
CCDC28B	1.3144	0.394401	0.342867	0.999062	up	81.9882	62.3067	52.8155	61.7494	64.8999	148.488	39.2619	61.1861	89.5863	39.0751	105.469	39.2619
IQCC	1.19669	0.259055	0.384257	0.999062	up	179.994	150.237	149.765	137.221	145.719	287.271	114.322	145.059	162.109	133.972	231.637	114.322
DCDC2B	1.26455	0.338619	0.409415	0.999062	up	97.5885	77.1274	63.668	65.5611	84.4923	176.633	41.5715	72.8733	119.448	75.9173	111.383	41.5715
TMEM234	1.17132	0.228138	0.390839	0.999062	up	331.76	283.008	313.276	268.343	346.541	398.879	182.453	270.869	312.841	356.141	393.289	182.453
EIF3I	1.03865	0.0547103	0.80271	0.999062	up	1451.34	1396.92	1112.74	1184.67	1700.87	1807.09	1164	1150.85	1500.22	1766.19	1636.24	1164
MTMR9LP	2.1515	1.10535	1	1	up	31.3051	14.474	5.0645	5.33637	6.12263	108.697	6.92858	10.3123	8.53203	7.81501	46.3273	6.92858
FAM167B	2.19166	1.13202	0.38491	1	up	2.02927	0.843244	0.7235	2.28701	1.22453	3.88203	1.15476	2.74994	0	0	0	1.15476
LCK	1.18626	0.246415	0.793395	0.999062	up	258.738	217.998	210.539	487.134	315.928	21.3512	176.679	576.112	71.1003	293.621	13.7996	176.679
HDAC1	1.02806	0.039927	0.779285	0.999062	up	1422.32	1383.77	1641.62	1509.43	1288.2	1250.02	1485.03	1437.53	1116.27	1389.96	1388.83	1485.03
MARCKSL1	1.01666	0.0238406	0.908494	0.999062	up	4190.56	4122.32	5957.3	3749.94	3533.98	3521.01	3542.81	4529.83	4086.84	5191.4	3840.24	3542.81
FAM229A	1.23388	0.303208	0.35973	0.999062	up	70.7703	57.0297	81.032	60.9871	62.4508	78.6112	34.6429	70.8109	39.8162	72.568	89.6976	34.6429
TSSK3	-1.06247	-0.0874211	0.651497	0.999062	down	256.265	272.165	253.225	230.226	215.517	326.091	237.881	257.807	248.851	294.738	355.833	237.881
BSDC1	1.04709	0.0663913	0.624937	0.999062	up	2393.16	2285.17	2402.02	2238.23	2509.05	2423.36	1976.95	2209.57	2285.16	2725.21	2537.16	1976.95
ZBTB8B	2.90214	1.53712	0.00563044	0.158957	up	34.783	11.7747	43.41	38.1169	11.0207	46.5844	6.92858	19.937	4.26602	8.93144	23.6565	6.92858
ZBTB8A	1.00356	0.00512603	0.980597	0.999062	up	938.613	935.623	926.804	826.375	739.614	1261.66	821.036	901.292	1194.48	766.988	1108.9	821.036
ZBTB8OS	-1.071	-0.0989615	0.597735	0.999062	down	315.847	337.69	264.078	292.738	369.807	336.767	394.929	293.556	261.649	378.47	302.606	394.929
RBBP4	-1.00054	-0.000775703	0.996392	0.999565	down	904.808	905.225	851.56	1054.31	904.925	808.434	1064.69	992.727	786.369	782.618	740.252	1064.69
SYNC	1	0	1	1	up	0	0	0	0	0	0	0	0	0	0	0	0
KIAA1522	1.48751	0.572897	0.444455	0.999062	up	6.71788	4.43492	9.4055	9.9104	3.67358	3.88203	1.15476	8.24981	2.84401	3.34929	9.85688	1.15476
YARS	1.13632	0.184363	0.491631	0.999062	up	287.786	253.043	287.23	359.824	329.398	174.692	300.238	291.493	160.687	272.409	193.195	300.238
S100PBP	-1.04007	-0.0566797	0.835443	0.999062	down	533.203	554.486	474.616	545.072	360.011	753.115	597.012	595.361	442.244	338.278	757.008	597.012
FNDC5	1.28293	0.359444	0.600471	1	up	4.5473	3.53277	2.894	4.57403	4.8981	5.82305	2.30953	2.06245	4.26602	3.34929	6.89981	2.30953
HPCA	-1.41624	-0.502065	0.861934	1	down	0.190585	0.423073	0	0.762338	0	0	0	0	1.42201	1.11643	0	0
TMEM54	1.26272	0.33653	0.636807	0.999062	up	12.1961	10.0168	17.364	17.5338	6.12263	7.76407	4.61905	5.49987	34.1281	3.34929	7.8855	4.61905
RNF19B	1.27009	0.344932	0.0970795	0.894056	up	19449.3	15313.3	17324.9	17630.6	24582.4	18259.2	12942.6	12462.7	19121.7	20328	14082.5	12942.6
AK2	1.10678	0.146372	0.507966	0.999062	up	1373.59	1241.23	1486.07	1241.85	1541.68	1224.78	1636.3	989.29	1028.11	1251.52	905.847	1636.3
AZIN2	1.10056	0.138241	0.845111	0.999062	up	6.55825	6.04548	7.9585	12.1974	1.22453	4.85254	2.30953	8.24981	7.11003	4.46572	11.8283	2.30953
TRIM62	1.16492	0.220235	0.247712	0.999062	up	847.101	726.842	974.555	867.541	787.37	758.938	595.858	858.668	592.976	914.357	803.336	595.858
ZNF362	1.19879	0.261573	0.236219	0.999062	up	529.244	441.168	664.897	438.345	577.976	435.758	420.334	439.302	297.199	583.893	485.944	420.334
A3GALT2	1.10102	0.138838	0.840684	0.999062	up	115.833	105.227	98.396	38.8793	74.6961	251.362	23.0953	51.5613	184.861	82.6159	266.136	23.0953
PHC2	1.10447	0.143349	0.623222	0.999062	up	23680	21440.2	23769.1	17406.5	23352.9	30191.6	13234.7	18226.6	27188.7	27074.6	29682	13234.7
MIR3605	-2.46383	-1.30091	0.0971029	0.894056	down	6.44752	15.5732	2.894	3.81169	17.1434	1.94102	8.08334	6.87484	45.5042	18.9793	5.91413	8.08334
LOC101929464	-1.2488	-0.32054	0.872189	1	down	0.496716	0.621922	0	0.762338	1.22453	0	1.15476	0	1.42201	0	0	1.15476
ZSCAN20	-2.10316	-1.07256	0.463502	1	down	1.36489	2.86774	0.7235	2.28701	2.44905	0	6.92858	0	0	3.34929	0	6.92858
CSMD2	-1.64717	-0.719993	0.823388	1	down	0	0.164281	0	0	0	0	0	0	0	0	0.985688	0
HMGB4	1	0	1	1	up	0	0	0	0	0	0	0	0	0	0	0	0
CSMD2-AS1	1	0	1	1	up	0	0	0	0	0	0	0	0	0	0	0	0
C1orf94	1	0	1	1	up	0	0	0	0	0	0	0	0	0	0	0	0
MIR552	1	0	1	1	up	0	0	0	0	0	0	0	0	0	0	0	0
GJB5	1.11256	0.153887	0.787916	0.999062	up	7.34853	6.57147	5.0645	5.33637	7.34716	11.6461	4.61905	3.43742	7.11003	7.81501	11.8283	4.61905
GJB4	-1.04496	-0.0634506	0.951471	1	down	2.63365	2.83448	2.1705	2.28701	1.22453	4.85254	1.15476	0.687484	7.11003	0	6.89981	1.15476
GJB3	-1.2328	-0.301936	0.861194	1	down	1.46722	1.72287	0	0.762338	1.22453	3.88203	0	3.43742	0	0	6.89981	0
GJA4	1.11191	0.153034	0.895063	1	up	2.10248	1.84701	0	3.04935	2.44905	2.91153	0	2.06245	2.84401	2.23286	3.94275	0
SMIM12	1.02892	0.0411374	0.786694	0.999062	up	610.569	593.751	579.524	607.584	502.056	753.115	584.31	565.799	614.306	533.654	680.125	584.31
DLGAP3	3.99503	1.99821	0.0766855	1	up	5.30176	1.20212	2.1705	12.1974	4.8981	1.94102	0	4.1249	0	1.11643	1.97138	0
LOC653160	1.57902	0.659027	0.0780463	0.816373	up	29.6326	18.4623	26.046	37.3546	31.8377	23.2922	12.7024	30.2493	15.6421	25.6779	13.7996	12.7024
ZMYM6NB	1.0092	0.0132074	0.954563	0.999062	up	80.2712	80.1099	86.0965	100.629	72.247	62.1126	97.0001	75.6232	78.2103	73.6844	59.1413	97.0001
ZMYM6	-1.23971	-0.310003	0.212489	0.999062	down	602.706	747.44	646.809	582.426	573.078	608.509	1067	588.486	554.582	581.66	625.912	1067
ZMYM1	1.01531	0.0219231	0.919698	0.999062	up	83.4285	81.659	75.244	83.0949	73.4716	101.903	87.762	105.873	65.4122	69.2187	73.9266	87.762
SFPQ	-1.45203	-0.53807	0.062496	0.730489	down	4017.45	5833.53	4446.63	4218.78	4708.3	2696.07	8127.22	5047.51	4344.23	6025.38	3329.65	8127.22
ZMYM4	-1.10398	-0.142711	0.702364	0.999062	down	166.967	184.525	194.622	243.948	132.249	97.0509	271.369	215.182	99.5404	137.321	112.368	271.369
KIAA0319L	1.00977	0.0140271	0.926724	0.999062	up	3197.02	3166.51	3578.43	3286.44	2578.85	3344.37	3510.48	3345.98	2761.53	2641.47	3229.11	3510.48
NCDN	1.01034	0.0148421	0.965248	0.999062	up	67.6054	66.8241	59.327	112.826	52.6546	45.6139	56.5834	110.685	56.8802	66.9858	53.2271	56.5834
TFAP2E	-1.28304	-0.359562	0.477814	0.999062	down	10.5883	13.4688	7.235	12.1974	12.2453	10.6756	20.7857	16.4996	11.376	4.46572	6.89981	20.7857
PSMB2	-1.03647	-0.0516787	0.682637	0.999062	down	813.596	844.164	837.813	829.424	717.572	869.576	944.596	807.106	831.873	766.988	769.822	944.596
C1orf216	1.51398	0.598342	0.320138	0.999062	up	12.3346	8.16084	17.364	18.2961	9.79621	3.88203	9.2381	9.62478	1.42201	14.5136	4.92844	9.2381
CLSPN	1.00946	0.0135768	0.943689	0.999062	up	445.947	442.102	436.994	396.416	366.133	584.246	445.738	450.302	540.362	333.813	436.66	445.738
AGO4	-1.00062	-0.000896401	0.996364	0.999565	down	17109.5	17120.4	17924	16010.6	13385.3	21118.3	18307.6	15461.5	15802.7	12818.9	22024.2	18307.6
AGO1	-1.01648	-0.0235765	0.847657	0.999062	down	2898.09	2946.58	3063.3	2732.22	2713.55	3083.31	2673.28	2778.12	3382.95	2916.12	3255.73	2673.28
AGO3	1.01845	0.0263683	0.851622	0.999062	up	773.414	758.22	688.049	771.486	915.946	718.176	742.513	770.67	647.012	879.747	766.865	742.513
TEKT2	-2.25167	-1.171	0.0446242	0.610549	down	7.49051	16.6872	6.5115	6.09871	13.4698	3.88203	28.8691	7.56232	15.6421	12.2807	6.89981	28.8691
ADPRHL2	1.23705	0.3069	0.209751	0.999062	up	237.584	191.614	217.05	250.809	197.149	285.33	162.822	213.808	125.136	203.19	281.907	162.822
COL8A2	1.13604	0.184016	0.785791	0.999062	up	15.3206	13.2129	2.894	5.33637	17.1434	35.9088	13.8572	17.1871	2.84401	16.7465	14.7853	13.8572
TRAPPC3	1.01802	0.0257595	0.797082	0.999062	up	584.995	574.801	632.339	534.399	588.997	584.246	577.381	571.299	590.132	555.982	576.627	577.381
MAP7D1	-1.0903	-0.124731	0.579032	0.999062	down	10495.8	11444.3	14797.7	8245.45	7904.32	11035.7	13828.3	9242.54	9958.3	10751.2	11057.4	13828.3
THRAP3	-1.05813	-0.081514	0.657122	0.999062	down	8249.09	8728.48	7312.41	7005.89	10188.1	8490.01	8127.22	6599.16	10621	10022.2	8874.15	8127.22
SH3D21	1.03298	0.0468111	0.83977	0.999062	up	367.226	355.59	398.649	382.694	334.296	353.265	244.81	428.303	425.18	462.202	328.234	244.81
EVA1B	1.10105	0.138881	0.683025	0.999062	up	331.976	301.242	400.819	413.187	236.334	277.565	197.464	547.237	211.879	386.285	267.121	197.464
STK40	-1.15163	-0.203678	0.439406	0.999062	down	28127.6	32392.7	28193.3	23995.4	31241.3	29080.3	20870	30321.5	46364.5	43653.6	32276.3	20870
LSM10	1.08116	0.112577	0.614713	0.999062	up	963.583	890.964	1007.11	875.164	1015.13	956.922	612.024	969.352	925.726	1203.51	1023.14	612.024
OSCP1	-1.02531	-0.036066	0.940615	0.999062	down	19.0423	19.3602	15.1935	9.14806	15.9188	35.9088	15.0119	15.8121	18.4861	13.3972	38.4418	15.0119
MRPS15	1.09699	0.133545	0.433543	0.999062	up	538.097	490.532	584.588	446.73	562.058	559.013	404.167	471.614	581.6	507.976	573.67	404.167
CSF3R	1.22156	0.28873	0.28855	0.999062	up	355636	291131	389038	316395	347670	369441	171686	303318	345593	366426	388080	171686
GRIK3	1.39691	0.482236	0.881169	1	up	0.180875	0	0.7235	0	0	0	0	0	0	0	0	0
MIR4255	1	0	1	1	up	0	0	0	0	0	0	0	0	0	0	0	0
LINC01137	-1.11312	-0.154614	0.607405	0.999062	down	53.8546	60.5448	88.9905	41.9286	33.0622	51.437	51.9643	59.8111	66.8343	72.568	60.127	51.9643
ZC3H12A	-1.63343	-0.707901	0.0519344	0.656979	down	4373.01	7143.3	6873.25	3547.92	2319.25	4751.61	5283.04	7311.39	4809.22	6615.97	13557.2	5283.04
MIR6732	-1.71583	-0.778906	0.44048	0.999062	down	3.58035	6.13282	6.5115	0.762338	1.22453	5.82305	1.15476	4.81239	1.42201	5.58215	22.6708	1.15476
MEAF6	-1.0338	-0.0479564	0.698972	0.999062	down	568.748	588.134	596.888	574.803	555.935	547.367	653.596	583.674	538.94	504.627	594.37	653.596
MIR5581	-2.10002	-1.0704	0.649028	1	down	0.190585	0.570993	0	0.762338	0	0	1.15476	0	0	1.11643	0	1.15476
SNIP1	-1.13286	-0.179966	0.470832	0.999062	down	1684.74	1907.94	1345.71	1292.16	2188.23	1912.87	1433.06	1622.46	1990.81	2519.78	2448.45	1433.06
DNALI1	2.16169	1.11216	0.727205	1	up	0.571754	0.114581	0	2.28701	0	0	0	0.687484	0	0	0	0
GNL2	-1.58049	-0.660371	0.039188	0.567331	down	292.88	462.349	247.437	298.837	468.994	156.252	592.393	402.866	355.501	530.305	300.635	592.393
RSPO1	1	0	1	1	up	0	0	0	0	0	0	0	0	0	0	0	0
C1orf109	-1.05546	-0.077871	0.82084	0.999062	down	28.2085	29.3585	20.258	38.1169	37.9603	16.4986	31.1786	39.1866	21.3301	25.6779	27.5993	31.1786
CDCA8	1.26607	0.340359	0.271684	0.999062	up	78.9026	61.9331	86.0965	73.9468	108.983	46.5844	62.3572	76.3107	41.2382	85.9652	43.3703	62.3572
EPHA10	1.04043	0.057178	0.763473	0.999062	up	197.061	189.388	173.64	175.338	194.7	244.568	167.441	173.933	233.209	168.581	225.723	167.441
MANEAL	-1.02283	-0.0325718	0.873564	0.999062	down	370.221	378.885	365.368	342.29	284.09	489.136	337.191	358.179	412.382	331.58	496.787	337.191
YRDC	-1.42483	-0.510786	0.120102	0.955505	down	90.2944	128.555	73.797	75.4715	62.4508	149.458	133.952	94.8728	81.0543	128.39	199.109	133.952
C1orf122	1.1959	0.258101	0.367463	0.999062	up	189.326	158.032	250.331	166.19	197.149	143.635	100.464	210.37	149.311	195.375	192.209	100.464
MTF1	-1.43942	-0.525483	0.0263571	0.456223	down	3588.96	5166.39	3636.31	2819.89	3905.01	3994.61	4377.71	3762.6	8163.73	5330.96	4985.61	4377.71
INPP5B	-1.46798	-0.55383	0.140349	0.996156	down	597.102	876.742	617.146	563.368	480.014	727.882	1476.94	544.487	516.188	454.387	791.507	1476.94
SF3A3	-2.19582	-1.13476	0.048855	0.63904	down	817.739	1796.03	1201.01	827.899	499.607	742.439	3890.4	805.044	942.79	459.969	787.565	3890.4
FHL3	1.04109	0.0581	0.877801	0.999062	up	2406.34	2311.92	4368.49	2628.54	1245.34	1382.97	3015.09	2455.01	2408.88	1655.67	1321.81	3015.09
UTP11L	2.05545	1.03946	2.27753e-22	1.38737e-19	up	768.339	374.026	825.514	736.419	740.838	770.584	396.084	363.679	359.767	346.093	382.447	396.084
POU3F1	3.40532	1.76779	0.0445596	1	up	7.11649	1.97554	9.4055	6.09871	11.0207	1.94102	0	4.1249	1.42201	3.34929	2.95706	0
MIR3659	1	0	1	1	up	0	0	0	0	0	0	0	0	0	0	0	0
LINC01343	1	0	1	1	up	0	0	0	0	0	0	0	0	0	0	0	0
RRAGC	-1.38109	-0.465812	0.0817126	0.833187	down	1423.24	1965.45	1451.34	1139.7	1923.73	1178.2	2324.54	1423.78	1879.89	2640.36	1199.58	2324.54
MYCBP	1.27468	0.35014	0.643321	0.999062	up	6.11335	4.91706	10.129	3.81169	8.57168	1.94102	2.30953	1.37497	8.53203	10.0479	4.92844	2.30953
GJA9-MYCBP	-3.46269	-1.7919	0.273212	1	down	0.36175	1.53172	1.447	0	0	0	1.15476	0.687484	2.84401	3.34929	0	1.15476
GJA9	1	0	1	1	up	0	0	0	0	0	0	0	0	0	0	0	0
RHBDL2	-1.03539	-0.0501675	0.819624	0.999062	down	126.191	130.777	121.548	115.875	100.411	166.927	117.786	134.059	154.999	99.3623	160.667	117.786
AKIRIN1	-1.14348	-0.193433	0.0319494	0.509585	down	6601.29	7548.96	6870.36	6460.05	6971.23	6103.53	7749.61	7304.52	7995.94	7478.97	7015.14	7749.61
NDUFS5	-1.29987	-0.378367	0.431402	0.999062	down	103.158	134.066	94.7785	157.042	124.902	35.9088	200.929	150.559	55.4582	146.252	50.2701	200.929
MACF1	-1.30538	-0.384467	0.356312	0.999062	down	2388.93	3118.7	3263.71	2819.89	2463.75	1008.36	4970.1	2862.68	2206.95	2467.31	1235.07	4970.1
KIAA0754	1.00039	0.000565736	0.997645	0.999565	up	269.388	270.03	295.188	247.76	219.19	315.415	254.048	244.744	351.235	215.471	300.635	254.048
BMP8A	1.28016	0.356324	0.163795	0.999062	up	232.942	181.895	214.88	223.365	184.903	308.622	129.333	227.557	238.897	156.3	209.952	129.333
PPIEL	1.0168	0.0240379	0.90504	0.999062	up	343.289	337.993	375.497	297.312	274.294	426.053	277.143	349.929	430.868	319.299	373.576	277.143
PABPC4	-1.07183	-0.100074	0.808395	0.999062	down	373.932	400.566	370.432	525.251	394.297	205.748	476.917	640.048	140.779	466.668	202.066	476.917
LOC101929516	-3.32246	-1.73225	0.421627	1	down	0.306132	0.881395	0	0	1.22453	0	0	2.74994	1.42201	1.11643	0	0
SNORA55	4.03588	2.01288	0.2703	1	up	1.10109	0.114581	1.447	0.762338	1.22453	0.970509	0	0.687484	0	0	0	0
HEYL	-3.84573	-1.94326	0.295517	1	down	0.190585	1.0487	0	0.762338	0	0	2.30953	0.687484	0	0	0.985688	2.30953
NT5C1A	1	0	1	1	up	0	0	0	0	0	0	0	0	0	0	0	0
HPCAL4	-1.29433	-0.372203	0.672602	0.999062	down	10.541	13.5922	9.4055	25.9195	4.8981	1.94102	9.2381	43.3115	4.26602	14.5136	0.985688	9.2381
PPIE	1.07169	0.0998861	0.726134	0.999062	up	84.3695	78.571	78.138	113.588	71.0225	74.7292	78.5239	107.248	51.1922	102.712	53.2271	78.5239
BMP8B	1.05017	0.0706231	0.783018	0.999062	up	45.7752	43.9754	39.069	54.8884	36.7358	52.4075	39.2619	45.3739	62.5682	37.9586	39.4275	39.2619
OXCT2	1.17561	0.233413	0.910092	1	up	1.14351	0.957824	0	4.57403	0	0	1.15476	3.43742	0	0	0	1.15476
TRIT1	1.01965	0.0280765	0.962114	0.999062	up	11.4972	11.1445	3.6175	22.1078	13.4698	6.79356	5.77381	15.1246	8.53203	17.8629	13.7996	5.77381
MYCL	-2.45163	-1.29374	0.0136357	0.295434	down	13.3493	33.1701	18.811	18.2961	3.67358	12.6166	40.4167	54.3112	14.2201	36.8422	12.8139	40.4167
MFSD2A	-2.33103	-1.22097	0.00196305	0.0703413	down	50.8722	119.044	88.267	33.5429	42.8584	38.8203	178.988	116.872	69.6783	102.712	67.0268	178.988
CAP1	-1.01786	-0.0255351	0.904444	0.999062	down	41823.1	42570.7	50268.1	36639.5	31230.3	49154.3	44382.2	35677.7	51183.7	30528.8	49269.6	44382.2
PPT1	-1.09414	-0.129802	0.630869	0.999062	down	13864	15169.6	13347.9	11595.9	11024.4	19487.8	14552.3	10722	21466.6	10228.7	19495.9	14552.3
RLF	-1.19648	-0.258794	0.280491	0.999062	down	5598.74	6698.23	4596.4	4460.44	8339.02	4999.09	6585.61	4773.89	7415.76	8760.63	6067.89	6585.61
TMCO2	1.61116	0.688102	0.756398	1	up	0.604377	0.423073	1.447	0	0	0.970509	0	0	1.42201	1.11643	0	0
ZMPSTE24	-1.14133	-0.190713	0.391306	0.999062	down	1465.72	1673.08	1480.28	1307.41	1659.23	1415.97	2226.38	1139.16	1567.05	1450.24	1429.25	2226.38
COL9A2	1.05972	0.0836883	0.889888	0.999062	up	780.664	736.452	554.201	420.811	1894.34	253.303	647.822	394.616	560.27	1941.47	226.708	647.822
SMAP2	1.01572	0.0224996	0.893538	0.999062	up	70432	69342.7	80873.6	55954.9	74497.7	70401.7	67740.7	53165.9	83097.7	75311.1	69000.1	67740.7
ZFP69B	-1.14265	-0.192386	0.623502	0.999062	down	57.2273	65.5402	40.516	51.0767	77.1452	60.1715	42.7262	39.8741	130.824	84.8487	52.2415	42.7262
ZFP69	-1.36954	-0.453693	0.29926	0.999062	down	12.0377	16.2103	9.4055	9.9104	22.0415	6.79356	17.3214	13.0622	22.7521	10.0479	16.7567	17.3214
EXO5	1.12876	0.174735	0.384202	0.999062	up	100.772	88.9737	113.59	79.2832	115.105	95.1099	76.2143	90.7479	89.5863	109.41	91.669	76.2143
ZNF684	2.29253	1.19694	0.0354948	0.537982	up	69.3472	30.1185	36.8985	40.4039	173.883	26.2037	43.881	18.5621	14.2201	42.4244	17.7424	43.881
RIMS3	1.55814	0.639824	0.277549	0.999062	up	32.1113	20.4003	26.7695	57.9377	33.0622	10.6756	12.7024	43.999	8.53203	34.6093	9.85688	12.7024
NFYC-AS1	-1.00138	-0.00198635	0.991095	0.999292	down	149.097	149.372	125.889	134.934	157.964	177.603	146.655	127.872	183.439	141.787	149.825	146.655
NFYC	-1.05324	-0.0748355	0.573015	0.999062	down	2932.67	3089.43	3075.6	2605.67	2971.93	3077.48	2845.34	2709.37	3616.16	3443.07	3077.32	2845.34
MIR30E	-1.56016	-0.641698	0.496371	1	down	2.28511	3.63146	1.447	3.04935	3.67358	0.970509	2.30953	2.74994	9.95404	4.46572	0	2.30953
MIR30C1	-1.25997	-0.333386	0.666285	1	down	2.8992	3.65882	2.1705	3.81169	3.67358	1.94102	1.15476	4.1249	7.11003	4.46572	3.94275	1.15476
KCNQ4	1.53427	0.617555	0.382087	0.999062	up	15.2749	9.99292	10.129	7.62338	17.1434	26.2037	2.30953	3.43742	15.6421	23.445	12.8139	2.30953
CITED4	1.0949	0.130804	0.432595	0.999062	up	143.405	130.949	162.064	141.033	129.8	140.724	143.191	136.809	99.5404	132.855	130.111	143.191
CTPS1	-1.03796	-0.0537566	0.934654	0.999062	down	41.8594	43.3024	35.4515	67.8481	61.2263	2.91153	49.6548	74.9358	17.0641	54.7051	13.7996	49.6548
SLFNL1-AS1	-1.02161	-0.0308414	0.88513	0.999062	down	548.629	560.883	535.39	476.461	480.014	702.648	491.929	501.176	774.993	448.805	656.468	491.929
SLFNL1	-2.41014	-1.26912	0.551286	1	down	0.487007	1.01605	0.7235	0	1.22453	0	0	4.1249	0	0	1.97138	0
SCMH1	-1.15799	-0.211627	0.697525	0.999062	down	62.1633	72.0766	97.6725	71.6598	50.2056	29.1153	122.405	85.9355	14.2201	56.938	30.5563	122.405
FOXO6	-1.19571	-0.257862	0.733607	0.999062	down	4.25263	5.04041	2.894	5.33637	4.8981	3.88203	1.15476	6.87484	9.95404	2.23286	8.87119	1.15476
EDN2	1	0	1	1	up	0	0	0	0	0	0	0	0	0	0	0	0
HIVEP3	1.52039	0.604442	0.288211	0.999062	up	120.643	79.0604	130.23	215.742	78.3697	58.2305	49.6548	210.37	19.9081	91.5473	53.2271	49.6548
GUCA2B	1	0	1	1	up	0	0	0	0	0	0	0	0	0	0	0	0
GUCA2A	-1.64717	-0.719993	0.823388	1	down	0	0.186072	0	0	0	0	0	0	0	1.11643	0	0
FOXJ3	-1.02763	-0.039326	0.66935	0.999062	down	2743.23	2819.97	2641.5	2828.28	2776	2727.13	2866.12	2562.25	3063	2677.2	2885.11	2866.12
RIMKLA	1.01238	0.0177528	0.950095	0.999062	up	84.9368	83.8278	79.585	60.9871	75.9206	123.255	61.2024	92.1229	118.026	74.8008	95.6117	61.2024
ZMYND12	1.46306	0.548985	0.761244	1	up	0.910509	0.557724	1.447	0	1.22453	0.970509	0	1.37497	0	0	1.97138	0
PPCS	-1.27553	-0.351101	0.13928	0.99353	down	447.795	571.151	436.271	394.891	515.526	444.493	787.548	413.178	476.372	490.113	472.144	787.548
CCDC30	-1.04127	-0.0583442	0.765306	0.999062	down	253.608	264.585	228.626	256.146	209.394	320.268	232.107	250.932	352.657	237.8	281.907	232.107
PPIH	-1.03174	-0.0450761	0.912791	0.999062	down	37.9281	39.1272	40.516	52.6013	39.1848	19.4102	47.3453	50.8738	24.1741	50.2394	14.7853	47.3453
YBX1	-1.2338	-0.303113	0.317424	0.999062	down	2323.22	2866.41	2430.24	2494.37	2741.71	1626.57	4157.15	2432.32	1827.28	2918.35	1706.23	4157.15
CLDN19	1.01562	0.0223613	0.924758	0.999062	up	116.509	115.024	116.484	96.0546	99.1866	154.311	98.1548	105.185	160.687	94.8966	133.068	98.1548
P3H1	1.0704	0.098152	0.753313	0.999062	up	147.367	137.515	187.387	145.607	132.249	124.225	169.75	173.246	56.8802	152.951	102.512	169.75
C1orf50	1.31771	0.398028	0.128611	0.970227	up	46.5538	34.8773	45.5805	44.978	58.7773	36.8793	32.3334	41.249	27.0181	45.7737	30.5563	32.3334
LOC100129924	2.00334	1.00241	0.368598	1	up	4.51905	2.16774	0.7235	2.28701	2.44905	12.6166	0	3.43742	1.42201	2.23286	5.91413	0
SVBP	-1.00466	-0.00671404	0.973139	0.999062	down	216.976	217.266	190.281	211.93	270.62	195.072	237.881	224.807	164.953	264.594	173.481	237.881
ERMAP	-1.06767	-0.0944715	0.645304	0.999062	down	178.038	191.004	188.834	167.714	146.943	208.659	172.06	145.747	260.227	190.91	205.023	172.06
ZNF691	-1.26361	-0.337555	0.513294	0.999062	down	12.9096	16.1407	9.4055	18.2961	17.1434	6.79356	23.0953	21.9995	7.11003	15.63	5.91413	23.0953
LOC339539	-1.35959	-0.443176	0.236644	0.999062	down	17.9705	24.8093	20.9815	12.1974	13.4698	25.2332	24.25	16.4996	38.3941	17.8629	27.5993	24.25
SLC2A1	-1.14495	-0.195285	0.630099	0.999062	down	706.023	808.34	567.948	532.112	408.992	1315.04	545.048	670.984	925.726	569.38	1593.86	545.048
SLC2A1-AS1	-1.2294	-0.297949	0.725814	1	down	3.44007	4.37228	3.6175	3.81169	2.44905	3.88203	1.15476	5.49987	14.2201	2.23286	1.97138	1.15476
FAM183A	-1.64717	-0.719993	0.823388	1	down	0	0.164281	0	0	0	0	0	0	0	0	0.985688	0
EBNA1BP2	-1.18008	-0.238879	0.578245	0.999062	down	47.1104	55.4096	39.7925	53.3637	71.0225	24.2627	86.6072	48.1239	25.5961	56.938	28.5849	86.6072
MIR6733	1	0	1	1	up	0	0	0	0	0	0	0	0	0	0	0	0
CFAP57	1.0649	0.0907187	0.941791	1	up	1.52817	1.49666	3.6175	1.52468	0	0.970509	0	2.06245	2.84401	1.11643	2.95706	0
TMEM125	2.15362	1.10677	0.730768	1	up	0.36175	0	1.447	0	0	0	0	0	0	0	0	0
C1orf210	-1.14724	-0.198169	0.340534	0.999062	down	98.8976	113.889	98.396	88.4312	89.3904	119.373	108.548	92.8103	143.623	93.7802	136.025	108.548
TIE1	-1.2422	-0.312898	0.804447	1	down	2.08672	2.67815	0.7235	7.62338	0	0	4.61905	3.43742	1.42201	0	1.97138	4.61905
MPL	-1.06649	-0.0928713	0.767031	0.999062	down	94.3371	100.438	80.3085	74.7092	61.2263	161.104	81.9882	114.122	100.962	82.6159	140.953	81.9882
CDC20	1.16749	0.223411	0.736549	0.999062	up	7.31518	6.17713	5.788	13.7221	4.8981	4.85254	6.92858	13.7497	4.26602	2.23286	2.95706	6.92858
ELOVL1	1.01963	0.0280393	0.862284	0.999062	up	1259.48	1235.58	1389.84	1220.5	1026.15	1401.41	1040.44	1319.28	1349.48	1224.72	1439.1	1040.44
MIR6734	1.14248	0.192172	0.885784	1	up	1.6057	1.29423	0	1.52468	4.8981	0	1.15476	2.06245	1.42201	0	1.97138	1.15476
MED8	-1.24034	-0.310732	0.0676203	0.76348	down	202.125	250.155	171.47	215.742	192.251	229.04	269.06	257.119	183.439	267.943	254.307	269.06
SZT2	1.13065	0.177156	0.372268	0.999062	up	2003.43	1771.77	2268.17	2149.79	1852.71	1743.03	1333.75	2266.63	1835.81	2059.81	1800.85	1333.75
MIR6735	1	0	1	1	up	0	0	0	0	0	0	0	0	0	0	0	0
HYI	1	0	1	1	up	0	0	0	0	0	0	0	0	0	0	0	0
PTPRF	4.91605	2.2975	0.124023	1	up	4.01262	0.771706	1.447	0.762338	1.22453	12.6166	0	0.687484	0	0	3.94275	0
KDM4A	-1.02349	-0.0334946	0.828758	0.999062	down	1007.83	1031.51	1067.89	978.842	1005.34	979.243	1206.73	923.979	821.919	918.822	1110.87	1206.73
KDM4A-AS1	1.10571	0.144971	0.547248	0.999062	up	247.886	224.137	228.626	217.266	206.945	338.708	165.131	226.87	264.493	225.519	297.678	165.131
ST3GAL3	-1.12443	-0.16919	0.694383	0.999062	down	14.7097	16.4996	13.023	19.0585	7.34716	19.4102	17.3214	19.2496	5.68802	16.7465	22.6708	17.3214
LOC101929592	1.38746	0.472444	0.704461	1	up	1.34372	0.892944	1.447	0.762338	1.22453	1.94102	1.15476	2.06245	0	0	0.985688	1.15476
MIR6079	1	0	1	1	up	0	0	0	0	0	0	0	0	0	0	0	0
ARTN	2.18608	1.12835	0.725639	1	up	0.37146	0	0.7235	0.762338	0	0	0	0	0	0	0	0
IPO13	1.13592	0.183856	0.469458	0.999062	up	153.116	134.458	156.276	196.683	118.779	140.724	109.702	198.683	103.806	126.157	158.696	109.702
DPH2	1.21972	0.286556	0.667802	0.999062	up	29.1829	23.7744	24.599	56.413	31.8377	3.88203	13.8572	54.9987	14.2201	36.8422	8.87119	13.8572
ATP6V0B	1.01586	0.022706	0.926761	0.999062	up	10353.2	10191.6	11022.5	9231.92	9223.13	11935.3	6644.51	10205	11670.4	12324.3	13660.6	6644.51
B4GALT2	-1.97247	-0.980006	0.0184227	0.365637	down	12.6061	24.6652	10.129	9.14806	9.79621	21.3512	15.0119	26.8119	29.8621	26.7943	34.4991	15.0119
CCDC24	1.44351	0.529585	0.28867	0.999062	up	50.4329	35.0089	65.115	47.265	33.0622	56.2895	10.3929	35.0617	51.1922	37.9586	65.0554	10.3929
SLC6A9	1.64256	0.715948	0.785148	1	up	0.762338	0.415233	0	3.04935	0	0	0	1.37497	0	1.11643	0	0
KLF17	1.73294	0.793224	0.0623996	0.730439	up	47.5183	27.2537	68.7325	60.2247	23.266	37.8498	18.4762	48.1239	19.9081	20.0958	38.4418	18.4762
DMAP1	1.021	0.029987	0.90848	0.999062	up	173.86	169.898	196.069	176.862	188.577	133.93	192.845	212.433	92.4304	198.725	130.111	192.845
ERI3	1.69449	0.76085	0.0911482	0.874912	up	39.4704	23.0855	42.6865	51.0767	33.0622	31.0563	20.7857	37.8116	7.11003	40.1915	11.8283	20.7857
ERI3-IT1	1.8528	0.889709	0.549949	1	up	1.87314	0.945047	0.7235	4.57403	1.22453	0.970509	0	3.43742	0	2.23286	0	0
RNF220	-1.03039	-0.0431972	0.861701	0.999062	down	522.815	538.872	613.528	637.315	491.035	349.383	645.512	622.173	398.162	549.284	372.59	645.512
MIR5584	1	0	1	1	up	0	0	0	0	0	0	0	0	0	0	0	0
TMEM53	1.21453	0.280397	0.374856	0.999062	up	163.792	134.678	132.401	143.32	154.29	225.158	85.4525	137.497	166.375	110.527	222.765	85.4525
C1orf228	2.31357	1.21012	0.032028	0.509718	up	156.796	67.7624	235.138	121.974	211.843	58.2305	115.476	54.9987	14.2201	83.7323	22.6708	115.476
RNU5F-1	1	0	1	1	up	0	0	0	0	0	0	0	0	0	0	0	0
RNU5D-1	1.29517	0.373139	0.907209	1	up	0.485254	0.328563	0	0	0	1.94102	0	0	0	0	1.97138	0
KIF2C	-1.50667	-0.591361	0.384562	0.999062	down	8.77271	13.2336	4.341	18.2961	8.57168	3.88203	23.0953	17.1871	4.26602	7.81501	3.94275	23.0953
RPS8	1.16793	0.223957	0.647474	0.999062	up	1504.59	1288	1240.8	2275.58	1983.73	518.252	1431.91	2115.39	450.776	1796.34	501.715	1431.91
SNORD55	-1.60234	-0.680185	0.510411	1	down	1.82284	3.04054	3.6175	0.762338	0	2.91153	5.77381	1.37497	0	3.34929	1.97138	5.77381
SNORD46	1.04515	0.0637035	0.981151	1	up	0.485254	0.466162	0	0	0	1.94102	0	1.37497	1.42201	0	0	0
SNORD38A	-2.49515	-1.31913	0.627445	1	down	0.180875	0.644394	0.7235	0	0	0	0	2.74994	0	1.11643	0	0
SNORD38B	1.71082	0.774687	0.673187	1	up	0.866424	0.515863	0	1.52468	0	1.94102	0	0.687484	1.42201	0	0.985688	0
BEST4	-1.09888	-0.136032	0.827814	0.999062	down	13.2563	14.4231	11.576	11.4351	18.3679	11.6461	2.30953	17.1871	18.4861	24.5615	21.6851	2.30953
PLK3	1.36655	0.450536	0.146578	0.999062	up	8464.11	6193.49	8479.42	6056.02	9479.06	9841.93	3916.96	5426.31	5114.95	9170.36	9615.38	3916.96
TCTEX1D4	1.21892	0.285608	0.481246	0.999062	up	759.686	623.05	585.312	663.997	658.795	1130.64	260.976	681.984	668.343	783.734	1082.29	260.976
BTBD19	1.30946	0.388973	0.355932	0.999062	up	1445.5	1103.7	1010.01	1279.2	1454.74	2038.07	423.798	1154.97	1255.63	1497.13	1866.89	423.798
PTCH2	-1.11493	-0.156959	0.689364	0.999062	down	32.8537	36.4607	18.0875	36.5922	33.0622	43.6729	39.2619	33.6867	36.9721	13.3972	56.1842	39.2619
EIF2B3	-1.03537	-0.0501502	0.94593	0.999062	down	10.1237	10.5068	6.5115	25.9195	6.12263	1.94102	8.08334	19.2496	5.68802	18.9793	2.95706	8.08334
HECTD3	1.03358	0.0476511	0.798059	0.999062	up	282.151	272.731	305.317	330.855	249.803	242.627	275.988	334.117	196.237	270.176	283.878	275.988
UROD	1.04996	0.0703362	0.766447	0.999062	up	96.3297	91.7243	115.76	92.2429	73.4716	103.844	106.238	112.06	62.5682	89.3144	73.9266	106.238
ZSWIM5	1.18723	0.247599	0.765166	0.999062	up	7.70417	6.39204	4.341	14.4844	11.0207	0.970509	5.77381	10.9997	1.42201	13.3972	0.985688	5.77381
LINC01144	2.43675	1.28496	0.205359	1	up	3.01299	1.236	1.447	3.04935	3.67358	3.88203	2.30953	1.37497	1.42201	0	0	2.30953
HPDL	1.03251	0.0461612	0.94763	0.999062	up	7.61414	7.30273	7.235	3.04935	3.67358	16.4986	3.46429	8.24981	8.53203	3.34929	16.7567	3.46429
MUTYH	1.12296	0.167303	0.453411	0.999062	up	96.2449	85.4518	112.143	98.3416	83.2678	91.2278	91.2263	98.9977	51.1922	81.4994	98.5688	91.2263
TOE1	1.00432	0.00622446	0.973955	0.999062	up	94.3954	93.6835	107.078	93.0053	93.064	84.4343	90.0715	106.56	71.1003	111.643	92.6547	90.0715
TESK2	1.22909	0.297594	0.163809	0.999062	up	1264.71	1028.73	1434.7	1073.37	1358	1192.76	757.524	1053.23	1012.47	1391.07	1200.57	757.524
CCDC163P	1.05621	0.0789014	0.766661	0.999062	up	87.6133	83.1926	85.373	80.8079	64.8999	119.373	65.8215	88.6854	119.448	64.753	94.626	65.8215
MMACHC	1.06214	0.0869708	0.826438	0.999062	up	26.6946	25.2006	28.94	26.6818	22.0415	29.1153	13.8572	35.0617	44.0822	16.7465	27.5993	13.8572
PRDX1	1.16959	0.226006	0.630343	0.999062	up	89.4239	76.2956	83.926	157.804	77.1452	38.8203	87.762	137.497	25.5961	74.8008	44.356	87.762
AKR1A1	1.19542	0.257517	0.487511	0.999062	up	55.846	46.355	52.092	77.7585	39.1848	54.3485	32.3334	85.9355	27.0181	50.2394	50.2701	32.3334
NASP	1.79295	0.842333	0.0270888	0.463318	up	1071.03	597.233	664.173	1177.05	1867.4	575.512	846.441	496.363	455.042	620.735	318.377	846.441
CCDC17	1.08636	0.119507	0.555861	0.999062	up	555.002	511.171	623.657	622.83	454.299	519.222	397.238	637.298	629.948	478.949	526.357	397.238
GPBP1L1	-1.01589	-0.0227507	0.840143	0.999062	down	4296.95	4364.89	3782.46	4147.88	4696.06	4561.39	4236.82	3950.28	4772.25	4416.6	4576.55	4236.82
RPS15AP10	-1.245	-0.316147	0.106512	0.92182	down	126.669	158.095	112.143	116.638	113.881	164.016	177.833	126.497	173.485	152.951	139.968	177.833
TMEM69	1.18668	0.246928	0.285329	0.999062	up	148.81	125.622	153.382	186.773	139.596	115.491	130.488	145.059	146.467	77.0337	124.197	130.488
IPP	-1.04496	-0.0634543	0.703063	0.999062	down	117.222	122.348	111.419	125.786	101.636	130.048	114.322	139.559	122.292	110.527	133.068	114.322
MAST2	1.10571	0.144969	0.366019	0.999062	up	223.127	201.357	245.267	222.603	213.068	211.571	215.941	237.182	156.421	195.375	187.281	215.941
PIK3R3	-1.38693	-0.471894	0.489792	0.999062	down	46.3366	64.248	67.2855	32.0182	68.5735	17.4692	131.643	33.6867	5.68802	59.1708	23.6565	131.643
LOC101929626	1	0	1	1	up	0	0	0	0	0	0	0	0	0	0	0	0
TSPAN1	-3.43967	-1.78227	0.579409	1	down	0	0.529814	0	0	0	0	0	2.06245	0	1.11643	0	0
POMGNT1	1.08531	0.118101	0.850341	0.999062	up	35.9131	32.9323	31.834	62.5117	31.8377	17.4692	38.1072	68.7484	2.84401	37.9586	11.8283	38.1072
LURAP1	1.02638	0.0375695	0.910176	0.999062	up	32.0641	31.2651	23.152	27.4442	28.1641	49.4959	26.5595	23.3745	39.8162	27.9108	43.3703	26.5595
RAD54L	-1.62692	-0.702144	0.312317	0.999062	down	5.67058	9.48722	8.682	8.38572	3.67358	1.94102	18.4762	5.49987	2.84401	6.69858	4.92844	18.4762
LRRC41	-1.1044	-0.14326	0.695656	0.999062	down	159.406	175.831	143.977	244.711	156.739	92.1983	169.75	285.306	96.6964	229.985	103.497	169.75
UQCRH	-1.08414	-0.116554	0.709757	0.999062	down	146.867	159.127	145.424	176.1	159.188	106.756	226.334	159.496	75.3663	144.02	123.211	226.334
NSUN4	1.18126	0.240327	0.467469	0.999062	up	610.107	516.496	986.854	654.849	364.909	433.817	392.619	874.48	470.684	476.716	491.858	392.619
FAAH	1.08172	0.11333	0.835589	0.999062	up	91.2888	84.6161	199.686	79.2832	31.8377	54.3485	139.726	98.9977	34.1281	54.7051	40.4132	139.726
FAAHP1	1.0545	0.0765539	0.900188	0.999062	up	10.3431	9.62081	8.682	17.5338	12.2453	2.91153	10.3929	19.2496	2.84401	8.93144	5.91413	10.3929
LINC01398	-1.57662	-0.656838	0.717995	1	down	0.918395	1.27484	0	0	3.67358	0	0	4.1249	1.42201	1.11643	0.985688	0
DMBX1	1.08349	0.115689	0.568506	0.999062	up	83.5562	77.1874	75.244	72.4221	75.9206	110.638	72.7501	72.8733	89.5863	79.2666	75.898	72.7501
MKNK1-AS1	-1.86023	-0.895481	0.0101044	0.241716	down	83.6534	156.079	80.3085	94.5299	91.8395	67.9356	152.429	136.809	300.043	122.807	71.9552	152.429
KNCN	1.43341	0.519448	0.834407	1	up	1.21314	0.875284	0	0	0	4.85254	0	0	4.26602	0	0.985688	0
MKNK1	-1.00339	-0.00488238	0.985497	0.999062	down	4798.94	4816.1	7060.64	4651.79	3025.8	4457.55	4806.12	4659.77	6753.1	3129.35	4742.14	4806.12
MOB3C	1.42434	0.510289	0.146376	0.999062	up	962.332	675.946	1251.66	969.694	1246.57	381.41	715.953	555.487	948.478	758.056	361.747	715.953
ATPAF1	-1.07194	-0.10023	0.741603	0.999062	down	131.923	141.375	138.189	167.714	133.473	88.3163	190.536	158.809	75.3663	129.506	103.497	190.536
TEX38	-3.93186	-1.97521	0.288823	1	down	0.242627	1.02932	0	0	0	0.970509	1.15476	2.74994	0	1.11643	0	1.15476
EFCAB14-AS1	3.10511	1.63465	0.190679	1	up	2.53745	0.766815	0.7235	3.81169	3.67358	1.94102	0	2.06245	1.42201	1.11643	0	0
EFCAB14	-1.08649	-0.119675	0.479914	0.999062	down	3288.06	3572.83	3472.8	3442.72	3650.31	2586.41	3963.15	3339.8	3738.45	3778	2654.46	3963.15
CYP4B1	1	0	1	1	up	0	0	0	0	0	0	0	0	0	0	0	0
CYP4Z2P	1	0	1	1	up	0	0	0	0	0	0	0	0	0	0	0	0
CYP4A11	-1.00042	-0.000606528	0.999603	1	down	1.79635	1.74638	0	3.04935	1.22453	2.91153	0	2.74994	1.42201	3.34929	2.95706	0
CYP4X1	1	0	1	1	up	0	0	0	0	0	0	0	0	0	0	0	0
CYP4Z1	1	0	1	1	up	0	0	0	0	0	0	0	0	0	0	0	0
CYP4A22	1	0	1	1	up	0	0	0	0	0	0	0	0	0	0	0	0
LINC00853	-1.00815	-0.0117133	0.996398	1	down	0.666129	0.657125	0.7235	0	0	1.94102	0	0	0	0	3.94275	0
PDZK1IP1	2.04681	1.03338	0.44214	0.999062	up	11.4414	5.51701	1.447	2.28701	6.12263	35.9088	0	4.1249	0	3.34929	25.6279	0
TAL1	1.06728	0.0939404	0.905779	0.999062	up	30.4521	28.4556	13.023	11.4351	6.12263	91.2278	33.4881	15.1246	4.26602	13.3972	70.9695	33.4881
STIL	-1.36122	-0.444901	0.0290671	0.48613	down	121.561	165.836	125.166	109.777	97.9621	153.34	162.822	149.872	182.017	129.506	207.98	162.822
CMPK1	-1.14437	-0.194556	0.571259	0.999062	down	527.836	603.782	411.672	644.176	685.735	369.764	891.477	611.173	307.153	553.75	367.662	891.477
LINC01389	-1.88466	-0.914303	0.696319	1	down	0.180875	0.537653	0.7235	0	0	0	0	0.687484	1.42201	1.11643	0	0
FOXE3	1	0	1	1	up	0	0	0	0	0	0	0	0	0	0	0	0
FOXD2-AS1	1.2347	0.304164	0.704325	0.999062	up	10.478	8.31427	9.4055	12.1974	18.3679	1.94102	1.15476	13.7497	4.26602	16.7465	12.8139	1.15476
FOXD2	-1.06389	-0.0893513	0.92274	0.999062	down	6.39583	6.88364	12.2995	8.38572	4.8981	0	11.5476	6.18736	0	10.0479	1.97138	11.5476
TRABD2B	1	0	1	1	up	0	0	0	0	0	0	0	0	0	0	0	0
SKINTL	1.87482	0.906749	0.645346	1	up	0.729634	0.300652	0.7235	0	1.22453	0.970509	0	0.687484	0	1.11643	0	0
SLC5A9	-1.28477	-0.361509	0.367374	0.999062	down	102.357	131.527	124.442	84.6196	151.841	48.5254	135.107	109.31	159.265	202.074	48.2987	135.107
SPATA6	-1.09853	-0.13558	0.729526	0.999062	down	257.427	282.593	228.626	210.405	456.748	133.93	359.131	173.933	251.695	409.73	141.939	359.131
AGBL4	1.39691	0.482236	0.881169	1	up	0.190585	0	0	0.762338	0	0	0	0	0	0	0	0
BEND5	-2.82769	-1.49963	0.290023	1	down	0.73321	2.25557	2.1705	0.762338	0	0	4.61905	2.06245	0	2.23286	0	4.61905
LOC101929721	1	0	1	1	up	0	0	0	0	0	0	0	0	0	0	0	0
AGBL4-IT1	1	0	1	1	up	0	0	0	0	0	0	0	0	0	0	0	0
ELAVL4	1.39691	0.482236	0.881169	1	up	0.306132	0	0	0	1.22453	0	0	0	0	0	0	0
DMRTA2	1	0	1	1	up	0	0	0	0	0	0	0	0	0	0	0	0
FAF1	-1.2068	-0.27119	0.560812	0.999062	down	144.202	174.103	159.17	180.674	173.883	63.0831	300.238	147.809	95.2744	142.903	58.1556	300.238
CDKN2C	-1.11789	-0.16078	0.683805	0.999062	down	16.8076	18.6739	15.917	19.8208	20.8169	10.6756	26.5595	17.8746	8.53203	16.7465	15.771	26.5595
MIR4421	1	0	1	1	up	0	0	0	0	0	0	0	0	0	0	0	0
MIR6500	1	0	1	1	up	0	0	0	0	0	0	0	0	0	0	0	0
C1orf185	1	0	1	1	up	0	0	0	0	0	0	0	0	0	0	0	0
RNF11	-1.08952	-0.123686	0.469107	0.999062	down	4355.75	4745.48	4025.55	3701.15	5080.56	4615.74	4135.21	3975.03	5739.21	5424.74	5063.48	4135.21
TTC39A	-1.12267	-0.166937	0.607433	0.999062	down	86.1434	96.6208	78.8615	42.6909	83.2678	139.753	107.393	65.311	100.962	80.383	118.283	107.393
TTC39A-AS1	-1.41624	-0.502065	0.861934	1	down	0.190585	0.423073	0	0.762338	0	0	0	0	1.42201	1.11643	0	0
EPS15	-1.12407	-0.168727	0.398104	0.999062	down	2505.18	2816.31	2710.23	2349.53	3020.91	1940.05	3288.76	2261.82	3128.41	2816.75	2113.31	3288.76
OSBPL9	-1.22567	-0.293571	0.31717	0.999062	down	2244.11	2750.67	2377.42	1628.35	3203.36	1767.3	2913.47	1606.65	3958.86	3162.85	1948.7	2913.47
NRD1	-1.11398	-0.155722	0.410568	0.999062	down	13844.7	15423	12464.5	12037.3	14892.7	15984.3	15393	11071.9	20216.7	13879.5	16584.2	15393
MIR761	1.57575	0.656041	0.651005	1	up	1.1646	0.735274	1.447	0.762338	2.44905	0	1.15476	0	0	1.11643	0.985688	1.15476
RAB3B	-1.10869	-0.148854	0.487072	0.999062	down	891.496	988.58	826.237	773.773	700.429	1265.54	903.025	922.604	1166.04	819.46	1217.32	903.025
TXNDC12	-1.01201	-0.0172231	0.914664	0.999062	down	3632.15	3675.45	3490.16	3102.72	4471.97	3463.75	3787.62	2940.37	3650.29	4370.83	3515.95	3787.62
KTI12	1	0	1	1	up	0	0	0	0	0	0	0	0	0	0	0	0
TXNDC12-AS1	1.4975	0.582559	0.543862	1	up	2.99007	2.04758	1.447	1.52468	1.22453	7.76407	1.15476	1.37497	4.26602	3.34929	0.985688	1.15476
BTF3L4	-1.0557	-0.0781944	0.540857	0.999062	down	606.683	640.522	570.118	647.225	562.058	647.329	713.643	630.423	553.16	607.338	624.926	713.643
ZFYVE9	1.02003	0.0286094	0.932586	0.999062	up	22.8972	22.1552	16.6405	32.0182	24.4905	18.4397	21.9405	30.2493	15.6421	23.445	19.7138	21.9405
CC2D1B	-1.07716	-0.107235	0.337894	0.999062	down	1078.12	1162.36	1159.05	1036.02	1042.07	1075.32	1078.55	1091.04	1329.58	1205.75	1190.71	1078.55
ORC1	-1.20615	-0.27041	0.221781	0.999062	down	77.7146	94.3225	95.502	61.7494	80.8187	72.7882	103.929	75.6232	118.026	82.6159	81.8121	103.929
PRPF38A	-1.4053	-0.490874	0.00126436	0.0504407	down	1140.5	1602.43	1096.83	1052.03	1354.33	1058.83	1781.8	1286.28	1585.54	1728.23	1450.93	1781.8
ZCCHC11	-1.07275	-0.10132	0.681547	0.999062	down	1671.54	1792.82	1470.88	1841.05	2295.99	1078.24	1918.06	1779.9	1663.75	2269.7	1207.47	1918.06
GPX7	1.17173	0.228643	0.752543	0.999062	up	25.8353	22.0021	23.152	44.2156	33.0622	2.91153	25.4048	31.6243	8.53203	39.0751	1.97138	25.4048
FAM159A	1.09155	0.126379	0.821045	0.999062	up	29.1568	26.7871	32.5575	57.9377	18.3679	7.76407	20.7857	37.1241	12.798	52.4722	16.7567	20.7857
COA7	1.0791	0.109826	0.522516	0.999062	up	194.624	180.764	188.11	183.724	210.619	196.043	167.441	169.809	247.429	170.814	161.653	167.441
ZYG11B	-1.02926	-0.041602	0.776118	0.999062	down	3020.83	3108.82	2854.21	2540.11	3365	3323.99	3284.15	2503.13	2976.26	3149.45	3455.82	3284.15
ZYG11A	-1.04994	-0.0703082	0.765772	0.999062	down	293.379	308.254	269.142	240.899	222.864	440.611	307.167	259.181	351.235	251.197	373.576	307.167
ECHDC2	1.42947	0.515483	0.46346	0.999062	up	29.8951	20.745	25.3225	60.9871	29.3886	3.88203	17.3214	51.5613	5.68802	25.6779	6.89981	17.3214
SCP2	-1.71869	-0.781312	0.0596852	0.715305	down	140.706	241.95	117.207	205.069	167.76	72.7882	390.31	206.245	191.971	175.28	97.5831	390.31
MIR1273F	-1.43936	-0.52543	0.437194	0.999062	down	4.77401	6.87988	5.788	3.04935	7.34716	2.91153	2.30953	4.81239	12.798	11.1643	7.8855	2.30953
MIR5095	1	0	1	1	up	0	0	0	0	0	0	0	0	0	0	0	0
MIR1273G	1.50778	0.592424	0.715795	1	up	1.03577	0.614082	0.7235	0	2.44905	0.970509	1.15476	1.37497	0	0	0	1.15476
PODN	-1.52756	-0.611234	0.664329	1	down	1.3746	2.02832	0	3.04935	2.44905	0	3.46429	4.1249	0	1.11643	0	3.46429
SLC1A7	1.76753	0.821733	0.594083	1	up	3.59796	1.96158	2.1705	6.09871	6.12263	0	0	6.18736	0	5.58215	0	0
CPT2	-1.07712	-0.107182	0.580848	0.999062	down	314.323	338.804	269.866	293.5	262.049	431.876	345.274	291.493	373.987	291.388	385.404	345.274
C1orf123	1.10113	0.138987	0.443861	0.999062	up	148.617	134.95	135.295	166.952	140.821	151.399	158.203	138.184	109.494	136.205	109.411	158.203
MAGOH	-1.36018	-0.443801	0.256144	0.999062	down	589.478	801.403	360.303	466.551	1130.24	400.82	714.798	453.052	1123.38	1250.4	551.985	714.798
LOC100507564	2.79049	1.48052	0.322036	1	up	1.83868	0.607425	0.7235	1.52468	1.22453	3.88203	0	0.687484	0	0	2.95706	0
LRP8	1.24003	0.310371	0.684199	0.999062	up	24.6618	19.7078	15.917	46.5026	34.2867	1.94102	15.0119	51.5613	11.376	22.3286	2.95706	15.0119
LOC105378732	-2.33711	-1.22472	0.704027	1	down	0	0.372144	0	0	0	0	0	0	0	2.23286	0	0
SLC25A3P1	1	0	1	1	up	0	0	0	0	0	0	0	0	0	0	0	0
DMRTB1	1	0	1	1	up	0	0	0	0	0	0	0	0	0	0	0	0
GLIS1	1	0	1	1	up	0	0	0	0	0	0	0	0	0	0	0	0
NDC1	1.0466	0.0657042	0.909516	0.999062	up	36.0554	34.3555	28.94	74.7092	31.8377	8.73458	36.9524	66.6859	12.798	37.9586	14.7853	36.9524
YIPF1	1.18344	0.242986	0.143148	0.999062	up	1547.47	1307.47	1619.92	1415.66	1320.04	1834.26	1172.08	1311.03	1234.3	1255.98	1699.33	1172.08
DIO1	-1.28497	-0.36174	0.626066	0.999062	down	3.90774	5.20647	3.6175	7.62338	2.44905	1.94102	9.2381	3.43742	4.26602	1.11643	3.94275	9.2381
HSPB11	-1.1413	-0.190674	0.564878	0.999062	down	89.5284	102.104	96.949	97.5793	110.207	53.378	144.345	101.748	62.5682	100.479	59.1413	144.345
LRRC42	-1.02345	-0.0334392	0.896791	0.999062	down	129.345	132.376	118.654	144.844	166.536	87.3458	107.393	123.06	160.687	185.327	110.397	107.393
LDLRAD1	-1.16699	-0.222786	0.661488	0.999062	down	8.71956	10.0703	3.6175	7.62338	11.0207	12.6166	8.08334	6.18736	14.2201	10.0479	13.7996	8.08334
TMEM59	1.09627	0.132601	0.324527	0.999062	up	5357.03	4886.19	4798.25	5116.05	6538.97	4974.83	5154.86	4252.09	4989.82	5119.95	4645.55	5154.86
TCEANC2	1.0072	0.0103527	0.947487	0.999062	up	590.367	586.328	543.349	558.032	535.118	724.97	536.965	554.112	676.875	535.887	677.168	536.965
MIR4781	1	0	1	1	up	0	0	0	0	0	0	0	0	0	0	0	0
CDCP2	1.64384	0.717066	0.808803	1	up	0.487007	0.164281	0.7235	0	1.22453	0	0	0	0	0	0.985688	0
CYB5RL	1.68253	0.750635	0.0947357	0.886679	up	17.0176	9.84025	16.6405	18.2961	14.6943	18.4397	5.77381	15.8121	7.11003	7.81501	16.7567	5.77381
MRPL37	1.12553	0.170605	0.730316	0.999062	up	57.7054	51.2546	43.41	112.064	40.4094	34.9383	64.6667	70.8109	12.798	66.9858	27.5993	64.6667
SSBP3	1.15722	0.210666	0.631307	0.999062	up	940.969	812.821	698.901	1541.45	1103.3	420.23	756.37	1448.53	372.565	1132.06	411.032	756.37
SSBP3-AS1	-1.28796	-0.365088	0.524806	0.999062	down	27.9267	35.8958	18.811	58.7	24.4905	9.70509	38.1072	71.4983	15.6421	40.1915	11.8283	38.1072
ACOT11	-1.273	-0.348236	0.647894	0.999062	down	27.5047	35.1671	59.327	11.4351	20.8169	18.4397	79.6786	11.6872	2.84401	22.3286	14.7853	79.6786
FAM151A	-1.2657	-0.33993	0.842803	1	down	0.847004	1.0984	1.447	0	0	1.94102	2.30953	0	0	0	1.97138	2.30953
MROH7	-3.62699	-1.85877	0.221718	1	down	1.33401	4.84821	2.1705	0	1.22453	1.94102	13.8572	1.37497	0	0	0	13.8572
MROH7-TTC4	-1.02116	-0.0302082	0.901407	0.999062	down	103.145	105.483	103.461	83.8572	89.3904	135.871	91.2263	94.8728	135.091	81.4994	138.982	91.2263
TTC4	-1.8159	-0.860688	0.439815	1	down	1.30139	2.35737	0.7235	2.28701	1.22453	0.970509	3.46429	2.74994	0	4.46572	0	3.46429
PARS2	1.65844	0.729824	0.324849	1	up	4.37175	2.54777	4.341	5.33637	4.8981	2.91153	1.15476	4.81239	2.84401	3.34929	1.97138	1.15476
TTC22	1.25031	0.322285	0.353138	0.999062	up	55.0193	43.819	52.092	83.8572	45.3075	38.8203	38.1072	76.3107	38.3941	42.4244	29.5706	38.1072
C1orf177	-1.12522	-0.170209	0.924571	1	down	1.24934	1.33188	0.7235	3.04935	1.22453	0	0	6.87484	0	1.11643	0	0
DHCR24	1.27314	0.348397	0.676837	0.999062	up	21.141	16.4179	12.2995	49.552	15.9188	6.79356	12.7024	52.9363	0	12.2807	7.8855	12.7024
TMEM61	1	0	1	1	up	0	0	0	0	0	0	0	0	0	0	0	0
BSND	-1.02106	-0.0300734	0.982835	1	down	1.03759	1.11477	1.447	0.762338	0	1.94102	1.15476	0	1.42201	0	2.95706	1.15476
PCSK9	2.12845	1.0898	0.545745	1	up	1.08963	0.499502	1.447	0	0	2.91153	1.15476	0.687484	0	0	0	1.15476
USP24	-1.10712	-0.146807	0.624024	0.999062	down	2089.67	2313.5	2218.97	2568.32	2338.85	1232.55	3116.7	2456.38	1484.57	2276.4	1430.23	3116.7
LOC100507634	1.01526	0.0218542	0.955138	0.999062	up	60.7145	59.9638	70.1795	57.1754	79.5942	35.9088	35.7976	57.0612	102.384	89.3144	39.4275	35.7976
MIR4422	1.39691	0.482236	0.881169	1	up	0.306132	0	0	0	1.22453	0	0	0	0	0	0	0
PPAP2B	-3.22657	-1.69	0.00461195	0.135267	down	15.5929	51.058	17.364	17.5338	6.12263	21.3512	28.8691	26.1244	157.843	30.1436	34.4991	28.8691
PRKAA2	-1.05582	-0.0783691	0.840405	0.999062	down	19.1484	20.433	20.9815	19.8208	13.4698	22.3217	13.8572	21.312	32.7061	12.2807	28.5849	13.8572
C1orf168	1	0	1	1	up	0	0	0	0	0	0	0	0	0	0	0	0
C8A	1	0	1	1	up	0	0	0	0	0	0	0	0	0	0	0	0
C8B	-14.5843	-3.86634	0.212535	1	down	0.485254	7.3135	0	0	0	1.94102	21.9405	0	0	0	0	21.9405
DAB1	1.01256	0.0180094	0.987463	1	up	2.26927	2.1908	4.341	2.28701	2.44905	0	1.15476	6.87484	2.84401	1.11643	0	1.15476
DAB1-AS1	1	0	1	1	up	0	0	0	0	0	0	0	0	0	0	0	0
OMA1	-1.20578	-0.269967	0.369444	0.999062	down	358.038	431.788	429.036	296.55	421.237	285.33	639.739	323.117	304.309	401.915	281.907	639.739
TACSTD2	-2.0269	-1.01927	0.168621	0.999062	down	54.5951	110.78	107.802	18.2961	61.2263	31.0563	230.953	34.3742	19.9081	131.739	16.7567	230.953
MYSM1	-1.15898	-0.212856	0.0347774	0.531604	down	1926.72	2233.97	1915.1	1958.45	1987.41	1845.91	2310.68	2054.2	2424.52	2299.85	2003.9	2310.68
JUN	-1.17435	-0.231865	0.372409	0.999062	down	1728.15	2029.15	1596.76	1709.92	1200.04	2405.89	1961.94	2402.76	1265.58	1803.04	2779.64	1961.94
LINC01135	-2.40249	-1.26453	0.301162	1	down	0.856714	2.22093	0.7235	0.762338	0	1.94102	1.15476	0.687484	7.11003	2.23286	0.985688	1.15476
LINC01358	2.21856	1.14962	0.720593	1	up	0.381169	0	0	1.52468	0	0	0	0	0	0	0	0
HSD52	1.00093	0.001343	0.999668	1	up	0.306132	0.237001	0	0	1.22453	0	0	0	1.42201	0	0	0
FGGY	1.1749	0.232539	0.436887	0.999062	up	86.7453	73.6961	63.668	67.0858	83.2678	132.96	54.2739	70.8109	98.1184	68.1023	96.5974	54.2739
MIR4711	1	0	1	1	up	0	0	0	0	0	0	0	0	0	0	0	0
LOC101926944	-1.2799	-0.356033	0.553964	0.999062	down	5.68459	7.23596	7.235	3.81169	4.8981	6.79356	11.5476	8.93729	2.84401	5.58215	2.95706	11.5476
HOOK1	-1.09918	-0.136424	0.819676	0.999062	down	26.2932	28.8709	26.046	41.9286	34.2867	2.91153	39.2619	37.8116	15.6421	32.3765	8.87119	39.2619
CYP2J2	-1.90666	-0.931046	0.666526	1	down	0.381169	0.815287	0	1.52468	0	0	0	0.687484	0	2.23286	1.97138	0
C1orf87	1	0	1	1	up	0	0	0	0	0	0	0	0	0	0	0	0
LOC101926964	1.29061	0.368056	0.268157	0.999062	up	75.04	58.0632	58.6035	88.4312	55.1037	98.0214	45.0358	62.561	62.5682	34.6093	98.5688	45.0358
NFIA-AS2	1	0	1	1	up	0	0	0	0	0	0	0	0	0	0	0	0
NFIA	1.15981	0.213884	0.625762	0.999062	up	29.4836	25.0721	31.1105	35.8299	30.6132	20.3807	17.3214	46.0614	9.95404	39.0751	20.6994	17.3214
NFIA-AS1	1	0	1	1	up	0	0	0	0	0	0	0	0	0	0	0	0
MGC34796	1.09847	0.135497	0.900003	1	up	2.10606	1.91312	1.447	3.81169	1.22453	1.94102	0	4.1249	4.26602	1.11643	1.97138	0
TM2D1	-1.04291	-0.0606094	0.759361	0.999062	down	163.382	170.58	184.493	156.279	183.679	129.078	204.393	156.059	157.843	169.697	131.096	204.393
INADL	-1.1064	-0.145869	0.524433	0.999062	down	501.678	555.603	649.703	436.82	459.197	460.992	729.81	486.739	507.656	474.483	405.118	729.81
MIR3116-1	1	0	1	1	up	0	0	0	0	0	0	0	0	0	0	0	0
MIR3116-2	1	0	1	1	up	0	0	0	0	0	0	0	0	0	0	0	0
L1TD1	1.02204	0.0314525	0.878632	0.999062	up	334.338	327.363	304.594	273.679	328.173	430.906	294.465	279.806	446.51	289.156	359.776	294.465
KANK4	-1.01236	-0.0177168	0.946801	0.999062	down	105.99	107.262	107.078	94.5299	89.3904	132.96	90.0715	123.747	135.091	63.6365	140.953	90.0715
USP1	-1.32838	-0.409673	0.160103	0.999062	down	842.351	1118.82	729.288	892.698	1097.18	650.241	1600.5	921.229	900.129	1052.79	637.74	1600.5
DOCK7	1.17393	0.231348	0.621261	0.999062	up	19.1326	16.1432	19.5345	27.4442	20.8169	8.73458	17.3214	27.4994	9.95404	17.8629	6.89981	17.3214
ANGPTL3	1	0	1	1	up	0	0	0	0	0	0	0	0	0	0	0	0
ATG4C	-1.32753	-0.408747	0.343957	0.999062	down	47.1362	62.6578	49.9215	49.552	55.1037	33.9678	110.857	47.4364	41.2382	37.9586	27.5993	110.857
LINC00466	-1.12832	-0.174172	0.606072	0.999062	down	19.0222	21.6707	16.6405	19.0585	12.2453	28.1448	23.0953	19.937	25.5961	15.63	22.6708	23.0953
FOXD3-AS1	3.14101	1.65123	0.357916	1	up	1.21664	0.300652	1.447	0	2.44905	0.970509	0	0.687484	0	1.11643	0	0
FOXD3	5.88745	2.55764	0.413466	1	up	1.15138	0	0.7235	0	0	3.88203	0	0	0	0	0	0
MIR6068	1	0	1	1	up	0	0	0	0	0	0	0	0	0	0	0	0
ALG6	1.01796	0.0256763	0.92442	0.999062	up	196.158	192.993	231.52	197.446	180.005	175.662	277.143	172.558	154.999	127.273	148.839	277.143
ITGB3BP	1.13337	0.18062	0.577503	0.999062	up	23.5959	20.3628	20.9815	24.3948	25.7151	23.2922	16.1667	26.8119	14.2201	21.2122	27.5993	16.1667
EFCAB7	-1.31387	-0.393827	0.469936	0.999062	down	18.9396	24.704	11.576	16.0091	40.4094	7.76407	16.1667	20.6245	51.1922	31.2601	12.8139	16.1667
DLEU2L	-1.12702	-0.172512	0.497437	0.999062	down	46.3355	51.8264	41.2395	34.3052	66.1244	43.6729	53.1191	44.6865	63.9902	45.7737	50.2701	53.1191
PGM1	1.02667	0.0379766	0.889561	0.999062	up	948.304	923.664	949.232	782.921	672.265	1388.8	901.87	826.356	838.983	639.715	1433.19	901.87
ROR1	2.15999	1.11102	0.426134	1	up	1.46898	0.614082	0.7235	0.762338	2.44905	1.94102	1.15476	1.37497	0	0	0	1.15476
ROR1-AS1	-1.13438	-0.181906	0.373872	0.999062	down	768.461	872.035	707.583	663.997	912.272	789.994	864.917	673.734	1267.01	793.782	767.851	864.917
UBE2U	1	0	1	1	up	0	0	0	0	0	0	0	0	0	0	0	0
CACHD1	-1.03836	-0.0543125	0.876706	0.999062	down	37.0686	38.5098	47.751	41.1663	42.8584	16.4986	42.7262	50.8738	39.8162	31.2601	23.6565	42.7262
MIR4794	1	0	1	1	up	0	0	0	0	0	0	0	0	0	0	0	0
RAVER2	1.04245	0.0599841	0.859211	0.999062	up	185.253	177.434	111.419	118.162	205.72	305.71	205.548	114.81	153.577	140.67	244.451	205.548
JAK1	1.0275	0.0391438	0.756704	0.999062	up	30510.8	29693.3	28723	28945.2	35838.2	28536.8	31128.9	27195.5	26780.6	33356.7	28569.2	31128.9
LINC01359	1.2191	0.285818	0.389954	0.999062	up	37.6638	30.6919	26.7695	36.5922	46.532	40.7614	19.631	32.3117	36.9721	48.0065	27.5993	19.631
MIR3671	-1.38769	-0.472686	0.376818	0.999062	down	16.5852	22.9803	10.129	20.5831	22.0415	13.5871	15.0119	30.9368	44.0822	27.9108	4.92844	15.0119
MIR101-1	1.09324	0.128614	0.891261	1	up	3.19387	3.04406	2.1705	3.04935	3.67358	3.88203	1.15476	0	8.53203	4.46572	2.95706	1.15476
AK4	1.57657	0.656789	0.0340757	0.527174	up	83.2134	52.9274	80.3085	109.777	89.3904	53.378	39.2619	65.9985	83.8983	45.7737	43.3703	39.2619
DNAJC6	-1.52571	-0.609477	0.344347	0.999062	down	6.07008	8.90234	2.1705	9.14806	11.0207	1.94102	6.92858	15.1246	4.26602	12.2807	7.8855	6.92858
LEPROT	1.10346	0.142041	0.582284	0.999062	up	2099.18	1902.85	2789.82	2274.06	1343.31	1989.54	1550.85	2415.82	2546.81	1417.87	1934.91	1550.85
LEPR	-1.08264	-0.114558	0.670773	0.999062	down	601.877	651.884	546.966	488.659	685.735	686.15	487.31	505.988	1113.43	659.81	657.454	487.31
PDE4B	2.12905	1.09021	5.89902e-06	0.000507764	up	90223.4	42377.2	78910	72451.9	112026	97506	36304.6	28443.3	41728.7	50390.1	61091.9	36304.6
LOC101927139	1	0	1	1	up	0	0	0	0	0	0	0	0	0	0	0	0
SGIP1	-2.05339	-1.03801	0.713937	1	down	0.180875	0.508023	0.7235	0	0	0	0	2.06245	0	0	0.985688	0
MIR3117	1	0	1	1	up	0	0	0	0	0	0	0	0	0	0	0	0
TCTEX1D1	-1.23546	-0.305043	0.798978	1	down	2.46241	2.9951	0.7235	2.28701	4.8981	1.94102	8.08334	0.687484	0	1.11643	0	8.08334
INSL5	1	0	1	1	up	0	0	0	0	0	0	0	0	0	0	0	0
WDR78	-1.28526	-0.362065	0.759699	1	down	2.47927	3.24722	2.894	4.57403	2.44905	0	0	5.49987	8.53203	4.46572	0.985688	0
MIER1	-1.22138	-0.288512	0.10109	0.904826	down	4113.73	5024.52	3888.09	3678.28	4606.67	4281.88	5981.67	3574.92	5009.72	4718.04	4881.13	5981.67
SLC35D1	-1.43454	-0.520586	0.317683	0.999062	down	262.881	377.203	363.197	256.146	319.601	112.579	724.036	276.369	156.421	260.128	122.225	724.036
C1orf141	-1.00321	-0.00461775	0.988724	0.999062	down	28.2154	28.2101	22.4285	19.8208	26.9396	43.6729	25.4048	29.5618	39.8162	23.445	25.6279	25.4048
IL23R	-1.0196	-0.0280093	0.92202	0.999062	down	302.61	308.316	241.649	243.948	247.354	477.49	278.298	258.494	264.493	273.525	496.787	278.298
IL12RB2	1.03278	0.0465279	0.860179	0.999062	up	88.8523	85.8811	75.9675	116.638	78.3697	84.4343	73.9048	128.56	100.962	66.9858	70.9695	73.9048
SERBP1	-1.26106	-0.334637	0.262754	0.999062	down	1185.6	1495.15	1119.25	1394.32	1438.82	789.994	2068.18	1358.47	1257.05	1458.06	760.951	2068.18
GADD45A	1.14418	0.194313	0.488795	0.999062	up	666.908	583.053	903.652	675.432	639.203	449.346	794.477	561.674	371.143	544.818	431.731	794.477
GNG12	-3.46278	-1.79193	0.577319	1	down	0	0.558215	0	0	0	0	0	0	0	3.34929	0	0
GNG12-AS1	-1.58728	-0.666556	0.279268	0.999062	down	39.0325	62.2683	39.7925	19.8208	20.8169	75.6997	34.6429	14.4372	166.375	44.6572	78.855	34.6429
DIRAS3	-1.30294	-0.381768	0.737884	1	down	2.18715	2.8259	1.447	0	2.44905	4.85254	1.15476	0	4.26602	4.46572	5.91413	1.15476
WLS	-1.03321	-0.0471292	0.911277	0.999062	down	3842.46	3970.23	3963.33	1716.79	4660.55	5029.18	2655.95	1603.9	7513.88	4411.02	4980.68	2655.95
MIR1262	-1.2385	-0.308598	0.90303	1	down	0.727882	0.894126	0	0	0	2.91153	0	0	1.42201	0	3.94275	0
RPE65	2.21856	1.14962	0.720593	1	up	0.381169	0	0	1.52468	0	0	0	0	0	0	0	0
DEPDC1	-7.43918	-2.89514	0.0588731	1	down	0.433212	3.36675	0	0.762338	0	0.970509	8.08334	2.06245	0	0	1.97138	8.08334
DEPDC1-AS1	1	0	1	1	up	0	0	0	0	0	0	0	0	0	0	0	0
LRRC7	-3.37502	-1.75489	0.276482	1	down	0.762338	2.74235	0	3.04935	0	0	5.77381	2.06245	2.84401	0	0	5.77381
PIN1P1	1	0	1	1	up	0	0	0	0	0	0	0	0	0	0	0	0
LRRC40	-1.1971	-0.259538	0.571647	0.999062	down	49.735	59.4517	45.5805	75.4715	52.6546	25.2332	86.6072	79.7481	18.4861	54.7051	30.5563	86.6072
SRSF11	-1.22257	-0.289915	0.295562	0.999062	down	2687.52	3285.55	2510.55	2611.77	3367.45	2260.31	4773.79	2496.25	2367.64	3062.37	2239.48	4773.79
ANKRD13C	-1.09682	-0.133326	0.768896	0.999062	down	101.742	111.412	100.567	114.351	144.494	47.5549	166.286	126.497	44.0822	123.924	41.3989	166.286
HHLA3	1.12875	0.174729	0.643158	0.999062	up	168.015	148.963	168.576	110.539	144.494	248.45	84.2977	110.685	230.365	140.67	243.465	84.2977
CTH	-1.08726	-0.120692	0.697485	0.999062	down	100.527	108.911	77.4145	64.0364	138.371	122.284	80.8334	79.0607	129.402	138.437	144.896	80.8334
LOC101927244	1	0	1	1	up	0	0	0	0	0	0	0	0	0	0	0	0
PTGER3	-1.26204	-0.335757	0.622274	0.999062	down	15.4524	19.5106	20.9815	4.57403	11.0207	25.2332	30.0238	6.18736	5.68802	6.69858	38.4418	30.0238
ZRANB2-AS1	1.17424	0.231731	0.649997	0.999062	up	9.99109	8.40451	8.682	13.7221	9.79621	7.76407	4.61905	10.9997	5.68802	15.63	8.87119	4.61905
ZRANB2	-1.25649	-0.3294	0.232786	0.999062	down	417.523	524.491	377.667	471.887	544.914	275.624	688.239	474.364	446.51	538.12	311.477	688.239
MIR186	-1.48144	-0.567	0.495084	1	down	3.11802	4.6506	6.5115	2.28701	3.67358	0	6.92858	6.18736	1.42201	4.46572	1.97138	6.92858
ZRANB2-AS2	-1.64717	-0.719993	0.823388	1	down	0	0.114581	0	0	0	0	0	0.687484	0	0	0	0
NEGR1	1.03609	0.0511522	0.935492	0.999062	up	13.5459	13.136	9.4055	12.9598	3.67358	28.1448	19.631	9.62478	9.95404	2.23286	17.7424	19.631
NEGR1-IT1	1	0	1	1	up	0	0	0	0	0	0	0	0	0	0	0	0
LINC01360	1.13738	0.185709	0.576551	0.999062	up	36.7236	32.4092	34.0045	33.5429	26.9396	52.4075	26.5595	27.4994	41.2382	22.3286	50.2701	26.5595
LRRIQ3	2.97952	1.57508	0.621391	1	up	0.562044	0	0.7235	1.52468	0	0	0	0	0	0	0	0
FPGT-TNNI3K	1	0	1	1	up	0	0	0	0	0	0	0	0	0	0	0	0
FPGT	-1.01743	-0.0249249	0.921527	0.999062	down	103.519	105.723	112.866	112.064	93.064	96.0804	124.714	114.81	130.824	61.4037	77.8693	124.714
TNNI3K	1	0	1	1	up	0	0	0	0	0	0	0	0	0	0	0	0
ERICH3	1.00093	0.001343	0.999668	1	up	0.306132	0.114581	0	0	1.22453	0	0	0.687484	0	0	0	0
ERICH3-AS1	1	0	1	1	up	0	0	0	0	0	0	0	0	0	0	0	0
CRYZ	1.39296	0.478154	0.429697	0.999062	up	10.6785	7.52149	6.5115	20.5831	9.79621	5.82305	6.92858	14.4372	2.84401	10.0479	3.94275	6.92858
TYW3	-1.02981	-0.042379	0.94822	0.999062	down	29.1545	29.9327	22.4285	52.6013	36.7358	4.85254	45.0358	46.7489	7.11003	26.7943	8.87119	45.0358
LHX8	-1.64717	-0.719993	0.823388	1	down	0	0.164281	0	0	0	0	0	0	0	0	0.985688	0
SLC44A5	-1.60394	-0.681622	0.697712	1	down	1.75313	2.88052	5.788	0	1.22453	0	8.08334	0	0	1.11643	0	8.08334
ACADM	-1.24355	-0.314461	0.527067	0.999062	down	55.2836	68.7761	62.9445	68.6104	57.5527	32.0268	123.56	76.3107	27.0181	34.6093	27.5993	123.56
DLSTP1	-1.01353	-0.0193844	0.941297	0.999062	down	48.4406	49.1827	35.4515	59.4624	36.7358	62.1126	47.3453	54.3112	56.8802	37.9586	51.2558	47.3453
RABGGTB	-1.09328	-0.12866	0.68536	0.999062	down	104.099	113.722	100.567	125.786	111.432	78.6112	157.048	115.497	54.0362	122.807	75.898	157.048
SNORD45C	1.98068	0.985995	0.498667	1	up	1.72314	0.884423	0.7235	2.28701	0	3.88203	2.30953	0.687484	0	0	0	2.30953
SNORD45A	-5.78838	-2.53316	0.124617	1	down	0.487007	2.61018	0.7235	0	1.22453	0	6.92858	0.687484	0	1.11643	0	6.92858
SNORD45B	1.6763	0.745283	0.798767	1	up	0.496716	0.186072	0	0.762338	1.22453	0	0	0	0	1.11643	0	0
MSH4	1.16851	0.224665	0.847347	1	up	2.4908	2.09629	2.894	6.09871	0	0.970509	1.15476	6.87484	1.42201	0	1.97138	1.15476
ASB17	-4.6124	-2.20552	0.48992	1	down	0	0.769842	0	0	0	0	2.30953	0	0	0	0	2.30953
LOC101927342	1	0	1	1	up	0	0	0	0	0	0	0	0	0	0	0	0
ST6GALNAC3	-1.0937	-0.129215	0.654477	0.999062	down	106.844	116.629	61.4975	109.014	148.168	108.697	94.6906	104.498	173.485	132.855	99.5545	94.6906
ST6GALNAC5	1.39691	0.482236	0.881169	1	up	0.190585	0	0	0.762338	0	0	0	0	0	0	0	0
MIR7156	1	0	1	1	up	0	0	0	0	0	0	0	0	0	0	0	0
PIGK	-1.12721	-0.17276	0.575529	0.999062	down	218.691	246.491	236.585	198.208	296.335	143.635	338.346	195.933	211.879	262.361	132.082	338.346
AK5	1.22245	0.28977	0.692181	0.999062	up	17.1805	14.052	13.023	44.978	4.8981	5.82305	10.3929	34.3742	12.798	13.3972	2.95706	10.3929
ZZZ3	-1.08307	-0.11512	0.763752	0.999062	down	115.774	125.317	97.6725	182.961	131.024	51.437	166.286	160.871	78.2103	108.294	71.9552	166.286
USP33	-1.12294	-0.167285	0.275706	0.999062	down	1877.09	2108.26	1745.08	1812.84	1822.09	2128.33	2355.72	1850.71	2337.78	1642.27	2107.4	2355.72
FAM73A	1.00053	0.000767316	0.996619	0.999565	up	612.636	612.635	566.501	559.556	546.139	778.348	592.393	587.799	776.415	481.182	645.626	592.393
NEXN-AS1	-1.16571	-0.221211	0.332901	0.999062	down	305.183	356.124	296.635	259.195	271.845	393.056	361.441	297.681	473.528	235.567	407.089	361.441
NEXN	1.35363	0.436829	0.528526	0.999062	up	25.3866	18.6515	6.5115	9.9104	22.0415	63.0831	19.631	6.18736	9.95404	11.1643	45.3416	19.631
FUBP1	-1.19868	-0.26145	0.262364	0.999062	down	845.12	1013.01	863.859	839.334	1095.95	581.335	1195.18	848.355	986.872	1164.44	688.01	1195.18
DNAJB4	-1.59969	-0.677793	0.206292	0.999062	down	30.7079	48.9652	28.94	38.1169	48.981	6.79356	70.4405	51.5613	24.1741	61.4037	15.771	70.4405
GIPC2	1.00093	0.001343	0.999668	1	up	0.190585	0.114581	0	0.762338	0	0	0	0.687484	0	0	0	0
MGC27382	1	0	1	1	up	0	0	0	0	0	0	0	0	0	0	0	0
PTGFR	-1.64717	-0.719993	0.823388	1	down	0	0.164281	0	0	0	0	0	0	0	0	0.985688	0
IFI44L	1.06732	0.0939864	0.837805	0.999062	up	648.41	607.353	533.22	697.54	1152.28	210.6	784.084	549.987	470.684	855.186	200.095	784.084
IFI44	1.25579	0.328601	0.503599	0.999062	up	558.315	444.457	413.119	612.158	1037.17	170.81	584.31	382.929	319.951	663.16	132.082	584.31
ADGRL4	1	0	1	1	up	0	0	0	0	0	0	0	0	0	0	0	0
LOC101927412	1.45153	0.537576	0.424001	0.999062	up	7.20394	4.85197	5.0645	9.14806	4.8981	9.70509	3.46429	10.9997	7.11003	1.11643	2.95706	3.46429
LOC101927434	1	0	1	1	up	0	0	0	0	0	0	0	0	0	0	0	0
ADGRL2	-1.00694	-0.00997304	0.997265	1	down	0.423502	0.343742	0.7235	0	0	0.970509	0	2.06245	0	0	0	0
LINC01361	-1.03471	-0.0492228	0.941149	0.999062	down	6.94619	7.08934	5.788	2.28701	6.12263	13.5871	5.77381	9.62478	11.376	1.11643	8.87119	5.77381
LOC101927587	-1.15479	-0.207626	0.392643	0.999062	down	87.9017	101.952	87.5435	77.7585	74.6961	111.609	90.0715	91.4354	150.733	77.0337	112.368	90.0715
LOC101927560	-1.34326	-0.425737	0.261264	0.999062	down	73.8517	99.2154	68.009	56.413	71.0225	99.9624	162.822	56.3737	58.3022	69.2187	85.7548	162.822
TTLL7	-1.06363	-0.0889909	0.917116	1	down	3.88117	4.09537	2.1705	4.57403	4.8981	3.88203	8.08334	1.37497	0	1.11643	5.91413	8.08334
PRKACB	1.08049	0.111686	0.859471	0.999062	up	274.604	254.004	208.368	558.794	268.171	63.0831	316.405	549.3	58.3022	216.588	67.0268	316.405
SAMD13	1	0	1	1	up	0	0	0	0	0	0	0	0	0	0	0	0
UOX	-1.64717	-0.719993	0.823388	1	down	0	0.114581	0	0	0	0	0	0.687484	0	0	0	0
DNASE2B	1	0	1	1	up	0	0	0	0	0	0	0	0	0	0	0	0
RPF1	-1.07033	-0.0980557	0.594292	0.999062	down	231.604	247.708	219.944	267.581	258.375	180.515	266.75	263.994	217.567	277.991	193.195	266.75
GNG5	1.02819	0.0401132	0.801918	0.999062	up	2940.19	2859.88	2919.32	2696.39	3030.7	3114.36	2392.67	2538.19	3488.18	3305.75	3041.83	2392.67
SPATA1	-1.35752	-0.440977	0.222231	0.999062	down	159.865	217.241	139.636	115.113	198.373	186.338	160.512	119.622	446.51	213.238	203.052	160.512
CTBS	1.03206	0.0455233	0.836795	0.999062	up	6927.83	6712.38	6207.63	5052.02	8854.55	7597.14	6026.71	4722.33	7644.7	7752.49	8101.37	6026.71
LINC01461	3.72993	1.89915	0.515719	1	up	0.739343	0	0	0.762338	1.22453	0.970509	0	0	0	0	0	0
LINC01555	-1.64717	-0.719993	0.823388	1	down	0	0.114581	0	0	0	0	0	0.687484	0	0	0	0
SSX2IP	-1.31083	-0.390485	0.275967	0.999062	down	85.339	111.695	52.092	98.3416	101.636	89.2868	167.441	83.8731	62.5682	122.807	66.0411	167.441
LPAR3	1.28108	0.357356	0.891441	1	up	0.727882	0.508023	0	0	0	2.91153	0	2.06245	0	0	0.985688	0
MCOLN2	1.20761	0.272158	0.679801	0.999062	up	39.7115	32.7233	26.7695	84.6196	41.6339	5.82305	34.6429	70.8109	7.11003	32.3765	16.7567	34.6429
MCOLN3	-2.71045	-1.43853	0.108148	1	down	1.59781	4.29537	1.447	1.52468	2.44905	0.970509	6.92858	4.1249	5.68802	1.11643	0.985688	6.92858
WDR63	1.96298	0.973045	0.438203	1	up	2.30811	1.1723	1.447	5.33637	2.44905	0	1.15476	1.37497	0	3.34929	0	1.15476
MIR4423	1	0	1	1	up	0	0	0	0	0	0	0	0	0	0	0	0
SYDE2	1.07274	0.101305	0.633949	0.999062	up	110.038	102.447	97.6725	100.629	99.1866	142.665	87.762	103.81	118.026	88.198	129.125	87.762
C1orf52	-1.09177	-0.126675	0.513536	0.999062	down	405.26	442.254	331.363	375.07	380.828	533.78	430.727	360.242	416.648	445.456	569.728	430.727
BCL10	-1.45372	-0.539751	0.0327546	0.518249	down	1226	1782.1	1047.63	913.281	1228.2	1714.89	1579.72	1220.97	2078.97	1705.91	2527.3	1579.72
LOC646626	-1.38521	-0.470101	0.350226	0.999062	down	9.20832	12.5356	5.0645	7.62338	13.4698	10.6756	18.4762	6.18736	7.11003	11.1643	13.7996	18.4762
DDAH1	-1.31141	-0.391122	0.717936	1	down	1.5246	1.98338	2.1705	0.762338	1.22453	1.94102	0	2.74994	2.84401	3.34929	2.95706	0
CYR61	-2.27215	-1.18406	0.713453	1	down	0	0.278862	0	0	0	0	0	0.687484	0	0	0.985688	0
ZNHIT6	1.00379	0.00545148	0.982887	0.999062	up	89.9137	89.4923	86.82	110.539	75.9206	86.3753	76.2143	131.309	106.65	64.753	81.8121	76.2143
COL24A1	-1.04103	-0.058008	0.951775	0.999062	down	6.47343	6.7572	8.682	9.14806	6.12263	1.94102	15.0119	7.56232	0	0	2.95706	15.0119
ODF2L	-1.11784	-0.16071	0.364522	0.999062	down	3188.79	3564.98	3021.34	2838.19	3462.96	3432.69	3623.65	2905.99	4824.86	2919.47	3492.29	3623.65
MIR7856	-1.17346	-0.230769	0.819834	1	down	2.39635	2.84299	4.341	3.04935	1.22453	0.970509	0	5.49987	4.26602	3.34929	3.94275	0
CLCA2	1	0	1	1	up	0	0	0	0	0	0	0	0	0	0	0	0
CLCA1	1	0	1	1	up	0	0	0	0	0	0	0	0	0	0	0	0
CLCA4	4.41273	2.14167	0.438392	1	up	0.856714	0	0.7235	0.762338	0	1.94102	0	0	0	0	0	0
CLCA3P	1.32144	0.402108	0.805656	1	up	1.03577	0.773426	0.7235	0	2.44905	0.970509	0	0	1.42201	2.23286	0.985688	0
SH3GLB1	-1.00247	-0.00355433	0.989185	0.999062	down	8355.38	8376.36	8476.53	6521.04	6918.57	11505.4	7703.42	5976.3	11303.5	6158.23	11413.3	7703.42
15-Sep	-1.14277	-0.192533	0.366085	0.999062	down	2106.84	2407.6	1933.19	1864.68	2625.38	2004.1	3041.65	1666.46	2424.52	2225.05	2046.29	3041.65
HS2ST1	-1.16672	-0.222454	0.390789	0.999062	down	494.104	576.644	418.183	394.891	489.81	673.533	647.822	351.304	692.517	426.476	693.924	647.822
LINC01140	1.2624	0.336173	0.612965	0.999062	up	5.94481	4.66753	5.0645	4.57403	7.34716	6.79356	1.15476	4.81239	8.53203	4.46572	7.8855	1.15476
LOC101927844	-1.02583	-0.0367964	0.909519	0.999062	down	40.3469	41.0713	36.8985	29.7312	40.4094	54.3485	25.4048	45.3739	44.0822	48.0065	58.1556	25.4048
LMO4	2.16675	1.11553	4.69418e-08	6.4649e-06	up	1171.89	540.925	1203.18	1296.74	1446.17	741.469	597.012	488.801	538.94	459.969	563.813	597.012
LINC01364	6.19117	2.63021	0.128328	1	up	3.44357	0.458323	5.0645	3.81169	4.8981	0	0	2.74994	0	0	0	0
PKN2-AS1	1.00827	0.0118804	0.983935	0.999062	up	14.5354	14.4616	7.9585	9.9104	25.7151	14.5576	8.08334	4.81239	34.1281	17.8629	13.7996	8.08334
PKN2	-1.04574	-0.0645279	0.710806	0.999062	down	11292.8	11808.9	9763.63	9728.2	14767.8	10911.4	12050	9156.6	13004.2	12807.7	11784.9	12050
GTF2B	1.87802	0.90921	0.000667873	0.0300505	up	3980.47	2119.59	3678.27	4526	5465.06	2252.55	2652.49	1788.83	2024.94	2070.98	1527.82	2652.49
CCBL2	-1.02942	-0.0418301	0.805093	0.999062	down	554.776	570.907	462.317	532.874	636.754	587.158	666.298	457.177	564.536	502.394	568.742	666.298
RBMXL1	1.23633	0.306068	0.0323794	0.513852	up	1454.8	1176.96	1184.37	1743.47	1512.29	1379.09	1247.14	1086.22	1237.14	1066.19	1177.9	1247.14
GBP3	4.76816	2.25343	3.71297e-10	6.75931e-08	up	2678.19	561.387	1889.78	3497.61	4141.35	1184.02	428.417	812.606	496.28	758.056	444.545	428.417
GBP1	7.8923	2.98045	7.07049e-17	2.60424e-14	up	38074.1	4824.03	30549.1	46939.5	59182.6	15625.2	4354.61	5799.62	3712.86	7382.96	3339.51	4354.61
GBP2	1.9122	0.935233	0.000473687	0.0225897	up	40357.2	21105.1	29841.5	46616.2	59272	25699.1	18104.4	19842.2	27030.9	26077.6	17471.3	18104.4
GBP7	2.35148	1.23357	0.0554805	0.68488	up	58.1019	24.513	21.705	73.1845	124.902	12.6166	23.0953	40.5616	14.2201	40.1915	5.91413	23.0953
GBP4	2.79814	1.48447	0.00491138	0.141688	up	6669.17	2383.19	3455.44	10382.3	11355	1483.91	1978.11	3862.29	1393.57	3938.77	1148.33	1978.11
GBP5	2.43106	1.28158	0.000387553	0.0193021	up	42986.1	17681.9	25946.2	54402	68803.7	22792.4	12209.3	19587.8	20907.7	27112.5	14064.8	12209.3
LOC729930	-2.33711	-1.22472	0.704027	1	down	0	0.372144	0	0	0	0	0	0	0	2.23286	0	0
GBP6	1.05256	0.0738959	0.739364	0.999062	up	253.939	240.929	185.216	212.692	325.724	292.123	207.857	217.245	321.373	255.663	235.579	207.857
GBP1P1	7.49783	2.90647	5.38617e-14	1.42177e-11	up	1078.67	143.793	807.426	1356.96	1733.93	416.348	151.274	152.621	108.072	217.704	81.8121	151.274
LRRC8B	1.20258	0.266137	0.294842	0.999062	up	500.027	415.74	428.312	511.529	442.054	618.214	317.56	387.741	476.372	333.813	661.397	317.56
FLJ27354	1.82345	0.866668	0.320837	1	up	3.79037	2.01011	2.894	7.62338	3.67358	0.970509	1.15476	4.1249	1.42201	2.23286	1.97138	1.15476
LRRC8C	1.52771	0.611369	0.220242	0.999062	up	298.225	194.952	297.359	455.878	341.643	98.0214	128.179	410.428	133.669	291.388	77.8693	128.179
LRRC8D	-1.02759	-0.0392646	0.891328	0.999062	down	231.576	237.87	195.345	316.37	202.047	212.541	311.786	304.555	159.265	166.348	173.481	311.786
GEMIN8P4	1.12671	0.17212	0.764016	0.999062	up	8.29875	7.51692	8.682	8.38572	12.2453	3.88203	8.08334	3.43742	11.376	11.1643	2.95706	8.08334
ZNF326	-1.04909	-0.0691443	0.849784	0.999062	down	189.139	198.304	142.53	231.751	275.518	106.756	277.143	154.684	135.091	242.265	103.497	277.143
BARHL2	1	0	1	1	up	0	0	0	0	0	0	0	0	0	0	0	0
ZNF644	-1.28921	-0.366486	0.287207	0.999062	down	683.006	880.282	515.132	786.733	1055.54	374.616	1144.37	777.544	802.011	992.507	420.889	1144.37
HFM1	-1.74238	-0.801063	0.681022	1	down	0.423502	0.824355	0.7235	0	0	0.970509	0	0	2.84401	1.11643	0.985688	0
CDC7	2.43435	1.28354	0.0208798	0.393216	up	56.6491	23.0896	41.2395	86.1442	75.9206	23.2922	32.3334	41.9365	11.376	15.63	4.92844	32.3334
TGFBR3	1.10109	0.138938	0.758905	0.999062	up	299.562	271.703	169.299	486.372	397.971	144.606	240.191	490.176	149.311	385.169	125.182	240.191
BRDT	1.09389	0.129467	0.637863	0.999062	up	126.503	115.576	121.548	115.113	82.0433	187.308	87.762	139.559	126.558	104.944	146.867	87.762
EPHX4	1.70916	0.773288	0.705953	1	up	1.18402	0.672796	0	2.28701	2.44905	0	0	0.687484	0	3.34929	0	0
SETSIP	-1.30319	-0.382046	0.255468	0.999062	down	81.4729	106.181	72.35	90.7183	106.534	56.2895	159.357	69.4359	78.2103	102.712	68.0125	159.357
BTBD8	-1.7424	-0.801074	0.219599	0.999062	down	5.77547	10.1148	4.341	6.09871	4.8981	7.76407	12.7024	8.24981	14.2201	0	12.8139	12.7024
KIAA1107	-1.27707	-0.352833	0.389235	0.999062	down	71.5053	91.7568	79.585	89.1936	31.8377	85.4048	133.952	82.4981	91.0083	31.2601	77.8693	133.952
C1orf146	1.56812	0.649038	0.826702	1	up	0.37146	0.237001	0.7235	0.762338	0	0	0	0	1.42201	0	0	0
GLMN	-1.12363	-0.168165	0.725818	0.999062	down	25.9117	28.8456	20.9815	27.4442	41.6339	13.5871	42.7262	37.1241	17.0641	24.5615	8.87119	42.7262
RPAP2	-1.47354	-0.559286	0.299764	0.999062	down	35.0691	51.535	26.7695	47.265	52.6546	13.5871	85.4525	52.9363	21.3301	50.2394	13.7996	85.4525
GFI1	-1.29217	-0.369801	0.574405	0.999062	down	48.1082	62.1124	23.8755	99.8663	55.1037	13.5871	101.619	90.0604	14.2201	51.3558	13.7996	101.619
EVI5	-1.1648	-0.220084	0.122703	0.959689	down	1020.26	1188.29	907.993	945.299	1115.54	1112.2	1272.55	1042.23	1349.48	1008.14	1184.8	1272.55
RPL5	-1.03321	-0.0471277	0.928928	0.999062	down	1637.65	1691.87	1216.2	2639.22	2278.84	416.348	2173.26	2517.57	817.653	2022.97	446.517	2173.26
FAM69A	1.60303	0.680799	0.452664	0.999062	up	53.0108	32.9989	30.387	101.391	73.4716	6.79356	12.7024	65.9985	28.4401	78.1501	0	12.7024
SNORD21	2.23642	1.16119	0.506832	1	up	1.23964	0.660074	1.447	2.28701	1.22453	0	0	0	2.84401	1.11643	0	0
SNORA66	-1.97149	-0.979288	0.447716	1	down	1.44964	2.8794	0	4.57403	1.22453	0	4.61905	5.49987	1.42201	1.11643	0	4.61905
MTF2	-1.22544	-0.293294	0.339031	0.999062	down	539.064	660.715	510.068	749.379	580.425	316.386	892.632	724.608	561.692	502.394	390.332	892.632
TMED5	-1.21482	-0.280737	0.118769	0.952886	down	3748.83	4554.67	3360.66	3866.58	4187.88	3580.21	4501.27	3744.04	6399.02	3983.42	4199.03	4501.27
CCDC18	-1.70374	-0.768702	0.0480291	0.634962	down	172.446	293.752	143.977	166.19	276.743	102.874	352.203	180.121	487.748	260.128	130.111	352.203
LOC100131564	-1.02898	-0.0412157	0.834311	0.999062	down	519.672	535.138	526.708	538.211	503.28	510.488	437.655	595.361	774.993	464.435	500.729	437.655
DR1	-1.02804	-0.0398954	0.77965	0.999062	down	1940.21	1995.31	1833.35	1992.75	1676.38	2258.37	2032.38	1913.27	2280.9	1640.04	2072.9	2032.38
FNBP1L	-1.41225	-0.497991	0.368482	0.999062	down	32.7732	46.2918	41.2395	19.8208	42.8584	27.1742	93.5358	20.6245	22.7521	16.7465	30.5563	93.5358
BCAR3	1.27301	0.348243	0.532257	0.999062	up	9.65226	7.54077	9.4055	10.6727	9.79621	8.73458	11.5476	6.18736	0	10.0479	5.91413	11.5476
LOC100129046	-2.73344	-1.45072	0.110487	1	down	1.29168	3.5498	1.447	1.52468	1.22453	0.970509	5.77381	4.1249	1.42201	2.23286	1.97138	5.77381
MIR760	1	0	1	1	up	0	0	0	0	0	0	0	0	0	0	0	0
DNTTIP2	1.32196	0.402675	0.173078	0.999062	up	6689.95	5060.59	5909.55	4596.9	7903.09	8350.26	4500.11	2707.31	5359.54	5155.68	8140.8	4500.11
GCLM	4.29631	2.1031	3.58153e-28	4.3634e-25	up	2674.65	622.657	2726.87	2312.93	2946.21	2712.57	584.31	515.613	682.563	496.812	872.334	584.31
ABCA4	1.09757	0.134315	0.9284	1	up	1.33226	1.21657	1.447	0	0	3.88203	0	0.687484	1.42201	2.23286	2.95706	0
ARHGAP29	1.25725	0.33027	0.669031	1	up	3.48415	2.82052	5.0645	2.28701	3.67358	2.91153	1.15476	2.74994	5.68802	2.23286	3.94275	1.15476
ABCD3	-1.26886	-0.343535	0.215651	0.999062	down	148.045	188.077	131.677	179.912	168.985	111.609	260.976	151.246	183.439	149.602	122.225	260.976
F3	-1.10446	-0.143337	0.556875	0.999062	down	102.077	112.779	106.355	87.6689	83.2678	131.019	102.774	105.873	118.026	82.6159	164.61	102.774
LINC01057	1.18351	0.243075	0.702569	0.999062	up	1109.06	937.009	651.874	312.559	969.825	2501.97	312.941	382.241	1107.74	1128.71	2377.48	312.941
MIR378G	-1.64717	-0.719993	0.823388	1	down	0	0.114581	0	0	0	0	0	0.687484	0	0	0	0
SLC44A3	1.34282	0.425267	0.626635	1	up	4.81386	3.55475	10.129	3.04935	1.22453	4.85254	1.15476	6.18736	2.84401	1.11643	8.87119	1.15476
CNN3	1.62396	0.699515	0.493506	1	up	2.84715	1.77601	2.1705	4.57403	3.67358	0.970509	0	1.37497	2.84401	4.46572	1.97138	0
LOC729970	1	0	1	1	up	0	0	0	0	0	0	0	0	0	0	0	0
ALG14	-1.10776	-0.147648	0.807948	0.999062	down	6.45058	7.32871	6.5115	12.9598	2.44905	3.88203	10.3929	6.87484	2.84401	5.58215	7.8855	10.3929
TMEM56	-1.00348	-0.00501274	0.98344	0.999062	down	270.695	271.868	262.631	243.948	204.496	371.705	207.857	271.556	355.501	252.313	336.12	207.857
TMEM56-RWDD3	-2.02803	-1.02008	0.590585	1	down	0.433212	0.934123	0	0.762338	0	0.970509	2.30953	0	0	0	0.985688	2.30953
LOC101928118	1.11269	0.154057	0.328086	0.999062	up	369.355	331.898	357.409	344.577	364.909	410.525	289.845	352.679	408.116	289.156	361.747	289.845
RWDD3	1.04973	0.0700115	0.863872	0.999062	up	22.0851	20.7184	17.364	16.7714	36.7358	17.4692	30.0238	17.8746	11.376	21.2122	13.7996	30.0238
FLJ31662	1.11043	0.151121	0.53407	0.999062	up	161.687	146.32	193.898	135.696	134.698	182.456	137.417	127.872	226.099	107.177	141.939	137.417
LOC100996635	1	0	1	1	up	0	0	0	0	0	0	0	0	0	0	0	0
LOC102723661	1	0	1	1	up	0	0	0	0	0	0	0	0	0	0	0	0
LOC101928241	1.90191	0.927448	0.0707396	0.778635	up	11.3328	5.82408	11.576	7.62338	18.3679	7.76407	6.92858	5.49987	2.84401	7.81501	4.92844	6.92858
PTBP2	-1.05054	-0.0711279	0.706618	0.999062	down	230.126	241.805	198.963	232.513	275.518	213.512	288.691	185.621	247.429	225.519	214.88	288.691
DPYD	1.00392	0.00563974	0.963524	0.999062	up	2475.87	2466.45	2294.94	2298.45	2654.77	2655.31	2504.68	2167.64	2866.76	2280.87	2474.08	2504.68
DPYD-AS1	-1.49837	-0.583398	0.318027	0.999062	down	3.9924	6.25202	5.0645	4.57403	2.44905	3.88203	5.77381	5.49987	9.95404	5.58215	4.92844	5.77381
DPYD-AS2	1.17743	0.235637	0.812963	1	up	2.34255	2.01134	3.6175	3.81169	0	1.94102	1.15476	4.81239	2.84401	1.11643	0.985688	1.15476
MIR137HG	1.19618	0.258439	0.679921	0.999062	up	5.82495	4.98946	7.9585	6.09871	2.44905	6.79356	6.92858	6.18736	5.68802	2.23286	1.97138	6.92858
MIR2682	1	0	1	1	up	0	0	0	0	0	0	0	0	0	0	0	0
MIR137	1	0	1	1	up	0	0	0	0	0	0	0	0	0	0	0	0
LOC729987	-1.14833	-0.199534	0.385149	0.999062	down	146.818	168.626	128.783	118.162	148.168	192.161	189.381	144.372	206.191	113.876	168.553	189.381
SNX7	1	0	1	1	up	0	0	0	0	0	0	0	0	0	0	0	0
LPPR5	1.39691	0.482236	0.881169	1	up	0.180875	0	0.7235	0	0	0	0	0	0	0	0	0
LOC100129620	1	0	1	1	up	0	0	0	0	0	0	0	0	0	0	0	0
LPPR4	-2.33711	-1.22472	0.704027	1	down	0	0.328563	0	0	0	0	0	0	0	0	1.97138	0
LOC101928270	1	0	1	1	up	0	0	0	0	0	0	0	0	0	0	0	0
MIR548N	1	0	1	1	up	0	0	0	0	0	0	0	0	0	0	0	0
PALMD	1	0	1	1	up	0	0	0	0	0	0	0	0	0	0	0	0
FRRS1	1.08485	0.117501	0.558009	0.999062	up	294.141	271.822	371.879	227.939	263.273	313.474	300.238	217.932	308.575	221.053	282.892	300.238
AGL	-1.26416	-0.338183	0.261322	0.999062	down	269.757	341.145	306.041	274.442	307.356	191.19	508.096	277.744	241.741	291.388	219.808	508.096
SLC35A3	-1.0013	-0.0018747	0.987606	0.999062	down	457.614	459.21	459.423	453.591	450.626	466.815	475.762	417.99	533.252	419.778	432.717	475.762
HIAT1	1.51918	0.603295	0.00354079	0.111303	up	4097.43	2696.97	3224.64	4153.22	5814.05	3197.83	2474.66	2390.38	3254.97	2906.07	2681.07	2474.66
SASS6	1.06074	0.0850692	0.784736	0.999062	up	179.606	169.51	201.133	205.069	204.496	107.726	240.191	148.497	139.357	155.184	93.6403	240.191
TRMT13	-1.04338	-0.0612619	0.900257	0.999062	down	42.0899	44.0127	41.963	65.5611	45.3075	15.5281	49.6548	55.6862	45.5042	54.7051	8.87119	49.6548
LRRC39	-1.64065	-0.71427	0.150145	0.999062	down	8.00846	12.9532	7.9585	4.57403	9.79621	9.70509	16.1667	14.4372	11.376	15.63	3.94275	16.1667
DBT	-1.04939	-0.0695473	0.68067	0.999062	down	719.49	755.279	698.178	640.364	646.55	892.868	691.703	746.608	935.68	641.948	824.035	691.703
RTCA-AS1	-1.07032	-0.098043	0.84477	0.999062	down	10.2882	10.7878	7.235	6.09871	17.1434	10.6756	6.92858	8.24981	12.798	18.9793	10.8426	6.92858
RTCA	1.11302	0.15448	0.208573	0.999062	up	413.378	371.108	405.884	435.295	393.073	419.26	399.548	392.553	325.639	333.813	375.547	399.548
MIR553	-1.04741	-0.0668294	0.973546	1	down	0.548759	0.464934	0	0	1.22453	0.970509	0	0.687484	0	1.11643	0.985688	0
CDC14A	-1.12358	-0.168101	0.337281	0.999062	down	629.729	707.916	629.445	645.701	737.165	506.606	747.132	651.735	887.331	646.413	567.756	747.132
GPR88	-1.3585	-0.442018	0.655353	1	down	1.89073	2.54227	0.7235	0.762338	1.22453	4.85254	4.61905	1.37497	1.42201	2.23286	0.985688	4.61905
LINC01349	1	0	1	1	up	0	0	0	0	0	0	0	0	0	0	0	0
VCAM1	1.21384	0.279574	0.796978	1	up	4.33548	3.48355	1.447	6.09871	9.79621	0	2.30953	4.81239	1.42201	10.0479	0	2.30953
EXTL2	1.47997	0.565568	0.394711	0.999062	up	9.39818	6.15813	7.235	14.4844	11.0207	4.85254	3.46429	12.3747	1.42201	12.2807	3.94275	3.46429
SLC30A7	1.1296	0.175812	0.412315	0.999062	up	929.763	823.391	999.877	1212.88	893.904	612.391	919.191	927.416	799.167	726.796	648.583	919.191
DPH5	1.01571	0.0224815	0.968497	0.999062	up	30.2646	29.7112	29.6635	51.0767	30.6132	9.70509	35.7976	50.8738	9.95404	37.9586	7.8855	35.7976
LOC102606465	1.85888	0.894433	0.252136	0.999062	up	8.21503	4.25432	14.47	7.62338	9.79621	0.970509	3.46429	10.9997	1.42201	2.23286	3.94275	3.46429
LOC101928370	1.01962	0.0280285	0.9728	0.999062	up	12.6688	12.3634	7.9585	23.6325	17.1434	1.94102	15.0119	17.1871	1.42201	24.5615	0.985688	15.0119
S1PR1	-1.03336	-0.0473375	0.938466	0.999062	down	1041.52	1076.14	920.292	1802.17	1274.73	168.869	1326.82	1778.52	250.273	1465.87	308.52	1326.82
LINC01307	1	0	1	1	up	0	0	0	0	0	0	0	0	0	0	0	0
OLFM3	1	0	1	1	up	0	0	0	0	0	0	0	0	0	0	0	0
DNAJA1P5	1	0	1	1	up	0	0	0	0	0	0	0	0	0	0	0	0
COL11A1	1	0	1	1	up	0	0	0	0	0	0	0	0	0	0	0	0
LOC101928436	1.64389	0.71711	0.810592	1	up	0.423502	0.186072	0.7235	0	0	0.970509	0	0	0	1.11643	0	0
RNPC3	-1.0787	-0.10929	0.332696	0.999062	down	932.948	1006.76	897.14	951.398	989.417	893.839	1087.79	940.478	1066.5	967.945	890.076	1087.79
AMY2B	-1.15256	-0.204836	0.271648	0.999062	down	317.478	366.735	345.11	366.685	295.111	263.008	443.429	319.68	358.345	292.505	343.019	443.429
ACTG1P4	-1.00696	-0.0100048	0.979712	0.999062	down	14.1502	14.542	20.258	12.1974	13.4698	10.6756	11.5476	11.6872	21.3301	13.3972	17.7424	11.5476
AMY2A	-1.15394	-0.206569	0.39835	0.999062	down	82.0761	95.1848	96.2255	87.6689	83.2678	61.142	124.714	76.3107	83.8983	82.6159	78.855	124.714
AMY1A	1	0	1	1	up	0	0	0	0	0	0	0	0	0	0	0	0
AMY1C	1	0	1	1	up	0	0	0	0	0	0	0	0	0	0	0	0
AMY1B	1	0	1	1	up	0	0	0	0	0	0	0	0	0	0	0	0
LOC100129138	-1.23006	-0.298729	0.299858	0.999062	down	35.4083	44.2317	32.5575	41.1663	23.266	44.6434	45.0358	36.4367	63.9902	33.4929	41.3989	45.0358
LOC101928476	1.21679	0.283079	0.610849	0.999062	up	8.60575	6.93951	6.5115	3.81169	8.57168	15.5281	5.77381	9.62478	9.95404	5.58215	4.92844	5.77381
PRMT6	1.23883	0.308981	0.719658	0.999062	up	20.4121	16.3448	20.9815	38.8793	20.8169	0.970509	15.0119	44.6865	1.42201	18.9793	2.95706	15.0119
NTNG1	-2.33711	-1.22472	0.704027	1	down	0	0.474002	0	0	0	0	0	0	2.84401	0	0	0
VAV3	-1.06895	-0.0961977	0.386871	0.999062	down	2062.98	2205.4	2071.38	2094.91	2118.43	1967.22	2431.93	2191.7	2199.84	1916.91	2060.09	2431.93
MIR7852	1	0	1	1	up	0	0	0	0	0	0	0	0	0	0	0	0
VAV3-AS1	1.20846	0.273175	0.774972	1	up	2.40423	1.94646	2.894	3.04935	3.67358	0	1.15476	3.43742	2.84401	1.11643	1.97138	1.15476
SLC25A24	-1.2242	-0.291843	0.385056	0.999062	down	226.822	278.067	257.566	272.155	238.783	138.783	379.917	255.744	329.905	198.725	124.197	379.917
NBPF4	1.39691	0.482236	0.881169	1	up	0.306132	0	0	0	1.22453	0	0	0	0	0	0	0
NBPF6	-2.23278	-1.15884	0.71932	1	down	0	0.229161	0	0	0	0	0	1.37497	0	0	0	0
FAM102B	-1.13342	-0.180684	0.448316	0.999062	down	306.074	347.064	313.999	327.805	333.071	249.421	476.917	283.931	264.493	299.203	280.921	476.917
HENMT1	-1.24781	-0.319401	0.190377	0.999062	down	144.359	180.458	130.23	150.181	135.922	161.104	245.964	145.059	174.907	132.855	137.996	245.964
PRPF38B	-1.44718	-0.533248	0.0168972	0.346207	down	2890.31	4182.45	2253.7	2842.76	3650.31	2814.48	5254.17	3070.99	3904.83	4444.51	3166.03	5254.17
FNDC7	1.10818	0.148195	0.834706	1	up	4.04802	3.66012	6.5115	4.57403	1.22453	3.88203	3.46429	6.18736	1.42201	4.46572	2.95706	3.46429
STXBP3	-1.16978	-0.226242	0.296724	0.999062	down	2790.91	3265.01	2802.12	2765	2851.92	2744.6	4401.96	2554.69	2842.59	2408.14	2980.72	4401.96
AKNAD1	1.21036	0.275438	0.878276	1	up	1.09496	0.989865	3.6175	0.762338	0	0	0	0.687484	4.26602	0	0.985688	0
SPATA42	-1.41602	-0.501841	0.859719	1	down	0.242627	0.423073	0	0	0	0.970509	0	0	1.42201	1.11643	0	0
GPSM2	-1.02313	-0.0329842	0.886121	0.999062	down	249.485	255.042	266.972	246.235	282.866	201.866	327.953	251.619	166.375	252.313	204.037	327.953
CLCC1	-1.12638	-0.171698	0.308475	0.999062	down	454.844	512.958	436.271	446.73	373.48	562.895	565.834	486.051	567.38	417.545	475.102	565.834
WDR47	-1.06989	-0.0974596	0.566324	0.999062	down	1425.95	1525.42	1467.26	1464.45	1704.54	1067.56	1748.31	1440.97	1373.66	1502.72	1338.56	1748.31
TAF13	-1.81591	-0.860689	0.0112502	0.258984	down	278.003	504.03	204.751	159.329	382.052	365.882	541.584	279.119	358.345	525.839	777.708	541.584
TMEM167B	-1.17112	-0.227892	0.100632	0.904826	down	3861.97	4523.58	3648.61	3783.48	4029.92	3985.88	4673.33	3659.48	5487.52	4093.95	4553.88	4673.33
SCARNA2	-1.70334	-0.768363	0.329571	0.999062	down	7.3716	12.3207	5.0645	8.38572	2.44905	13.5871	6.92858	43.999	5.68802	4.46572	5.91413	6.92858
C1orf194	-1.21288	-0.278442	0.640444	0.999062	down	11.7664	14.2376	5.0645	25.1572	11.0207	5.82305	15.0119	25.4369	15.6421	4.46572	9.85688	15.0119
KIAA1324	-1.00554	-0.00797101	0.984333	0.999062	down	9184.56	9235.7	9522.71	14320.5	3508.27	9386.76	8667.65	13683.7	11583.7	3388.37	9423.18	8667.65
SARS	1.06073	0.0850559	0.539077	0.999062	up	1220.68	1151.76	1250.21	1212.12	1089.83	1330.57	1175.55	1079.35	1370.81	942.267	1167.05	1175.55
CELSR2	1.30911	0.388582	0.618879	0.999062	up	21.1018	15.948	3.6175	47.265	30.6132	2.91153	10.3929	32.9992	4.26602	26.7943	10.8426	10.3929
PSRC1	1.07926	0.110041	0.670101	0.999062	up	136.53	126.755	143.977	157.042	161.637	83.4637	127.024	127.185	156.421	144.02	78.855	127.024
MYBPHL	2.44859	1.29195	0.640745	1	up	0.666129	0.186072	0.7235	0	0	1.94102	0	0	0	1.11643	0	0
SORT1	1.02145	0.0306166	0.889814	0.999062	up	1848.71	1810.32	2178.46	1729.75	1757.2	1729.45	2385.74	1418.97	1595.49	1285.01	1790.99	2385.74
PSMA5	1.04316	0.0609605	0.678125	0.999062	up	241.882	231.57	238.755	265.294	241.232	222.246	247.119	261.931	201.925	232.218	199.109	247.119
SYPL2	1	0	1	1	up	0	0	0	0	0	0	0	0	0	0	0	0
ATXN7L2	1.08582	0.11879	0.549391	0.999062	up	112.48	103.248	134.571	109.014	115.105	91.2278	93.5358	125.81	86.7423	118.342	101.526	93.5358
CYB561D1	-1.00911	-0.01309	0.961065	0.999062	down	914.281	922.7	908.716	845.433	579.201	1323.77	758.679	995.477	1016.73	696.653	1309.98	758.679
AMIGO1	-1.00831	-0.0119404	0.986658	0.999062	down	9.09737	9.10352	9.4055	15.2468	9.79621	1.94102	4.61905	19.2496	8.53203	15.63	1.97138	4.61905
GPR61	1.25677	0.329717	0.423524	0.999062	up	16.2879	12.8042	18.0875	12.9598	14.6943	19.4102	6.92858	15.8121	12.798	15.63	18.7281	6.92858
GNAI3	-1.10726	-0.146998	0.56394	0.999062	down	8023.66	8883.92	5999.99	5691.62	10643.6	9759.44	8315.45	5682.74	10121.8	10706.6	10161.5	8315.45
MIR197	-1.66634	-0.736684	0.0955396	0.890615	down	11.1256	18.5372	9.4055	6.86104	9.79621	18.4397	12.7024	14.4372	29.8621	17.8629	23.6565	12.7024
GNAT2	-2.09942	-1.06999	0.000675806	0.0301505	down	272.883	573.006	277.101	169.239	265.722	379.469	406.477	442.74	991.138	585.01	606.198	406.477
AMPD2	-1.30074	-0.379328	0.201933	0.999062	down	29238.2	38030.8	24723.4	21498.7	33161.4	37569.4	23754.6	32621.1	43059.7	49955.8	55038.8	23754.6
GSTM4	-1.07993	-0.110933	0.858242	0.999062	down	133.821	144.689	295.188	80.8079	117.555	41.7319	278.298	100.373	36.9721	123.924	50.2701	278.298
GSTM2	-1.07361	-0.102469	0.822907	0.999062	down	179.069	192.514	325.575	185.248	124.902	80.5522	306.012	197.308	82.4763	160.766	102.512	306.012
GSTM1	-1.03109	-0.0441751	0.93691	0.999062	down	76.953	79.554	151.935	85.3819	40.4094	30.0858	133.952	99.6852	34.1281	48.0065	27.5993	133.952
GSTM5	-1.3409	-0.423206	0.59258	0.999062	down	5.65729	7.72806	7.9585	6.86104	4.8981	2.91153	17.3214	2.74994	1.42201	5.58215	1.97138	17.3214
GSTM3	-1.01879	-0.0268563	0.899037	0.999062	down	335.171	341.751	333.534	301.886	307.356	397.909	299.084	330.68	467.84	246.731	407.089	299.084
EPS8L3	-1.64717	-0.719993	0.823388	1	down	0	0.164281	0	0	0	0	0	0	0	0	0.985688	0
CSF1	2.21588	1.14788	0.00315923	0.101906	up	1784.71	805.14	2213.19	1622.26	1856.38	1447.03	965.382	877.917	189.127	678.79	1154.24	965.382
AHCYL1	-1.16221	-0.216873	0.186796	0.999062	down	2365.28	2748.38	2083.68	2439.48	2896	2041.95	2573.97	2770.56	2910.85	3359.34	2301.58	2573.97
STRIP1	-1.03214	-0.0456386	0.773399	0.999062	down	965.026	995.566	1052.69	956.735	982.07	868.605	1082.01	1069.73	709.581	1065.07	964.988	1082.01
ALX3	-1.09286	-0.128115	0.674722	0.999062	down	33.228	36.2258	38.3455	30.4935	28.1641	35.9088	24.25	42.624	38.3941	34.6093	53.2271	24.25
LINC01397	1.00093	0.001343	0.999668	1	up	0.180875	0.164281	0.7235	0	0	0	0	0	0	0	0.985688	0
UBL4B	1.18144	0.240545	0.917984	1	up	0.433212	0.384921	0	0.762338	0	0.970509	1.15476	0	0	0	0	1.15476
SLC6A17	1.00093	0.001343	0.999668	1	up	0.242627	0.164281	0	0	0	0.970509	0	0	0	0	0.985688	0
KCNC4-AS1	1.00093	0.001343	0.999668	1	up	0.190585	0.114581	0	0.762338	0	0	0	0.687484	0	0	0	0
KCNC4	1.00095	0.00137207	0.996338	0.999565	up	41.2041	41.412	49.9215	49.552	34.2867	31.0563	34.6429	56.3737	54.0362	40.1915	28.5849	34.6429
LOC440600	1.23774	0.307713	0.275263	0.999062	up	144.828	117.515	148.318	131.885	99.1866	199.925	99.3096	90.0604	174.907	92.6637	148.839	99.3096
RBM15	-1.14092	-0.190191	0.196025	0.999062	down	431.978	492.596	412.395	400.99	450.626	463.903	525.417	409.74	415.226	559.332	520.443	525.417
SLC16A4	-1.05324	-0.074836	0.711661	0.999062	down	174.068	183.947	172.193	154.755	161.637	207.689	173.214	161.559	265.915	156.3	173.481	173.214
LAMTOR5	-1.31074	-0.39038	0.194378	0.999062	down	1159.8	1520.03	942.721	785.208	1617.6	1293.69	1845.31	726.671	1827.28	1518.35	1357.29	1845.31
LAMTOR5-AS1	-4.85972	-2.28087	0.0728944	1	down	0.675839	3.23749	0	0.762338	0	1.94102	2.30953	2.06245	0	7.81501	4.92844	2.30953
PROK1	-1.41754	-0.503388	0.87592	1	down	0.306132	0.372144	0	0	1.22453	0	0	0	0	2.23286	0	0
CYMP	1	0	1	1	up	0	0	0	0	0	0	0	0	0	0	0	0
LOC440602	1	0	1	1	up	0	0	0	0	0	0	0	0	0	0	0	0
KCNA10	1	0	1	1	up	0	0	0	0	0	0	0	0	0	0	0	0
KCNA2	-1.53236	-0.615754	0.56483	1	down	1.84044	2.74907	1.447	1.52468	2.44905	1.94102	2.30953	6.18736	5.68802	0	0	2.30953
KCNA3	1.09563	0.131764	0.79013	0.999062	up	339.408	309.59	270.589	581.664	363.684	141.694	361.441	589.861	152.155	305.902	86.7405	361.441
CD53	1.16435	0.21952	0.200241	0.999062	up	44973.9	38625.7	45056	38734.4	51246.4	44858.9	31221.3	36005.6	44670.9	44087.8	44547.2	31221.3
LRIF1	-1.30444	-0.383435	0.0302412	0.495306	down	883.376	1152.06	923.91	726.508	1049.42	833.667	1317.58	890.292	1033.8	1281.66	1071.44	1317.58
DRAM2	-1.07449	-0.103657	0.747888	0.999062	down	232.005	249.112	204.751	253.859	279.192	190.22	377.607	239.244	137.935	206.54	155.739	377.607
CEPT1	-1.16679	-0.22255	0.443689	0.999062	down	237.45	277.124	188.11	316.37	219.19	226.129	392.619	290.806	204.769	197.608	184.324	392.619
DENND2D	-1.06085	-0.0852176	0.788814	0.999062	down	397.321	421.486	321.958	667.046	367.358	232.922	423.798	623.548	379.675	411.963	266.136	423.798
CHI3L2	2.1735	1.12002	0.153235	0.999062	up	24.1262	11.0097	20.9815	37.3546	34.2867	3.88203	10.3929	17.1871	1.42201	25.6779	0.985688	10.3929
CHIAP2	-1.33425	-0.416029	0.105068	0.919917	down	53.0706	71.2978	52.8155	50.3143	48.981	60.1715	92.381	51.5613	78.2103	58.0544	55.1985	92.381
CHIA	1	0	1	1	up	0	0	0	0	0	0	0	0	0	0	0	0
PIFO	2.21856	1.14962	0.720593	1	up	0.381169	0	0	1.52468	0	0	0	0	0	0	0	0
PGCP1	1	0	1	1	up	0	0	0	0	0	0	0	0	0	0	0	0
OVGP1	1.11514	0.157228	0.768184	0.999062	up	11.8175	10.6928	11.576	19.8208	11.0207	4.85254	5.77381	14.4372	15.6421	15.63	6.89981	5.77381
WDR77	-1.39365	-0.478864	0.229965	0.999062	down	39.0693	54.748	41.963	64.7988	28.1641	21.3512	75.0596	64.6235	29.8621	51.3558	32.5277	75.0596
ATP5F1	-1.15685	-0.210204	0.152257	0.999062	down	916.272	1060.15	879.053	901.846	933.089	951.099	1252.92	884.792	934.258	1014.84	1021.17	1252.92
C1orf162	-1.9353	-0.952555	0.00188132	0.0680288	down	935.939	1812.06	1317.49	583.951	787.37	1054.94	2147.86	898.542	2272.36	1491.55	1914.21	2147.86
TMIGD3	-1.11113	-0.152021	0.757917	0.999062	down	57.0437	63.6297	117.207	32.7805	58.7773	19.4102	90.0715	37.1241	38.3941	83.7323	42.3846	90.0715
ADORA3	-2.29472	-1.19832	0.203605	0.999062	down	143.85	330.236	329.916	50.3143	140.821	54.3485	744.822	93.4978	25.5961	286.923	85.7548	744.822
LINC01160	1.03551	0.0503483	0.801779	0.999062	up	453.753	438.422	487.639	400.99	446.952	479.431	333.726	450.99	601.508	427.593	482.987	333.726
RAP1A	1.12648	0.171819	0.304792	0.999062	up	8748.53	7766.05	8851.3	6943.38	9870.91	9328.53	7587.95	6051.23	7496.81	8415.65	9456.69	7587.95
FAM212B	-1.05848	-0.0819974	0.73721	0.999062	down	12709.9	13453.2	12243.1	10397.5	9810.9	18388.2	10478.3	13245.8	14373.6	13204	18939	10478.3
FAM212B-AS1	-1.298	-0.376286	0.403939	0.999062	down	8.46897	10.6177	5.0645	6.86104	12.2453	9.70509	9.2381	10.3123	9.95404	11.1643	13.7996	9.2381
LOC101928718	-1.25577	-0.328571	0.420183	0.999062	down	12.877	16.2371	12.2995	11.4351	12.2453	15.5281	20.7857	12.3747	17.0641	6.69858	19.7138	20.7857
DDX20	-1.35167	-0.434742	0.0666488	0.758322	down	202.858	274.726	252.502	215.742	194.7	148.488	316.405	285.993	264.493	301.436	163.624	316.405
KCND3	1.07968	0.110607	0.942954	1	up	1.27664	1.10693	0	0	1.22453	3.88203	1.15476	1.37497	0	0	2.95706	1.15476
KCND3-IT1	1	0	1	1	up	0	0	0	0	0	0	0	0	0	0	0	0
KCND3-AS1	1	0	1	1	up	0	0	0	0	0	0	0	0	0	0	0	0
LOC643355	-3.64478	-1.86583	0.553073	1	down	0.242627	0.985688	0	0	0	0.970509	0	0	0	0	5.91413	0
CTTNBP2NL	-1.03816	-0.0540273	0.933626	0.999062	down	5.97314	6.05633	7.235	7.62338	6.12263	2.91153	4.61905	11.6872	1.42201	10.0479	3.94275	4.61905
MIR4256	1	0	1	1	up	0	0	0	0	0	0	0	0	0	0	0	0
WNT2B	-3.75357	-1.90826	0.0101185	0.241716	down	3.58825	13.5204	2.894	5.33637	6.12263	0	12.7024	10.3123	31.2841	11.1643	2.95706	12.7024
ST7L	-1.97344	-0.980709	0.0164021	0.339578	down	190.673	376.387	159.894	144.844	247.354	210.6	252.893	230.995	918.615	300.32	302.606	252.893
CAPZA1	-1.21047	-0.275567	0.0997335	0.903023	down	18637.7	22561.1	19080.1	16570.2	18743.8	20156.5	23360.9	17344.5	29095.7	19457.2	22747.7	23360.9
MOV10	1.33322	0.414913	0.183811	0.999062	up	759.162	569.088	710.477	926.241	909.823	490.107	338.346	790.607	568.802	794.899	583.527	338.346
RHOC	1.69012	0.757127	0.164414	0.999062	up	108.222	63.7129	70.903	173.813	93.064	95.1099	18.4762	138.184	39.8162	73.6844	93.6403	18.4762
PPM1J	-1.40183	-0.487314	0.560015	1	down	3.67124	5.15737	1.447	7.62338	3.67358	1.94102	5.77381	8.93729	7.11003	3.34929	0	5.77381
FAM19A3	1.39691	0.482236	0.881169	1	up	0.306132	0	0	0	1.22453	0	0	0	0	0	0	0
LINC01356	-1.20321	-0.266887	0.2297	0.999062	down	173.197	208.925	172.917	154.755	178.781	186.338	177.833	167.746	324.217	192.026	213.894	177.833
SLC16A1	1.02784	0.0396097	0.956259	0.999062	up	46.7728	45.3291	34.728	76.9962	68.5735	6.79356	32.3334	97.6227	19.9081	84.8487	4.92844	32.3334
AKR7A2P1	4.94677	2.30649	0.459416	1	up	1.33409	0.114581	0	5.33637	0	0	0	0.687484	0	0	0	0
SLC16A1-AS1	-1.07089	-0.0988124	0.702748	0.999062	down	190.183	204.306	248.161	186.773	124.902	200.895	247.119	194.558	210.457	120.575	206.009	247.119
LOC100996251	-1.01519	-0.0217507	0.928019	0.999062	down	655.782	665.902	633.063	529.825	559.608	900.632	541.584	628.36	901.551	533.654	848.677	541.584
LRIG2	1.03753	0.053151	0.814651	0.999062	up	138.323	132.724	133.124	164.665	132.249	123.255	117.786	193.87	99.5404	145.136	122.225	117.786
LOC643441	1	0	1	1	up	0	0	0	0	0	0	0	0	0	0	0	0
MAGI3	-1.13621	-0.184234	0.544696	0.999062	down	167.776	191.114	230.073	146.369	194.7	99.9624	204.393	146.434	288.667	119.458	183.338	204.393
PHTF1	1.03772	0.0534126	0.833627	0.999062	up	989.381	953.535	814.661	760.814	1166.97	1215.08	950.37	599.486	1316.78	764.755	1139.46	950.37
RSBN1	2.08566	1.0605	2.34878e-06	0.000222219	up	2924.57	1402.09	2734.11	2456.25	3306.22	3201.71	1374.17	1076.6	1322.47	1098.57	2166.54	1374.17
AP4B1-AS1	-1.30939	-0.388898	0.0947831	0.886679	down	203.448	266.628	177.258	189.06	164.087	283.389	267.905	226.87	314.263	188.677	334.148	267.905
PTPN22	-1.76053	-0.816006	0.046388	0.620649	down	732.338	1289.32	832.025	695.253	957.579	444.493	2202.13	882.729	887.331	1046.1	515.515	2202.13
BCL2L15	1.17553	0.233306	0.469499	0.999062	up	693.123	589.821	656.938	524.489	460.422	1130.64	487.31	479.176	802.011	401.915	881.205	487.31
AP4B1	-1.30934	-0.388837	0.0460219	0.61834	down	107.467	140.353	93.3315	123.499	105.309	107.726	148.964	148.497	98.1184	167.465	130.111	148.964
DCLRE1B	-1.39917	-0.484573	0.242295	0.999062	down	31.1468	43.6598	33.281	38.8793	28.1641	24.2627	68.131	47.4364	18.4861	39.0751	20.6994	68.131
HIPK1-AS1	1.07538	0.104847	0.678553	0.999062	up	203.916	189.811	193.898	201.257	160.413	260.096	143.191	212.433	270.181	145.136	224.737	143.191
HIPK1	-1.03026	-0.0430022	0.797745	0.999062	down	12319.6	12692.3	11071.7	10857.2	13313	14036.5	10958.7	10802.4	15219.7	13456.3	14757.7	10958.7
OLFML3	-1.2415	-0.312086	0.603928	0.999062	down	36.3934	45.4873	82.479	33.5429	20.8169	8.73458	65.8215	59.1236	49.7702	15.63	16.7567	65.8215
SYT6	-1.35426	-0.437502	0.892079	1	down	0.242627	0.229161	0	0	0	0.970509	0	1.37497	0	0	0	0
TRIM33	-1.04033	-0.0570424	0.635781	0.999062	down	6447.71	6708.2	6512.22	6166.55	6832.86	6279.19	7520.97	5695.12	6733.2	6283.27	6495.68	7520.97
BCAS2	-1.50523	-0.589988	0.0338659	0.525336	down	881.639	1326.47	765.463	612.158	1067.79	1081.15	1381.1	827.043	981.184	1368.74	2019.67	1381.1
DENND2C	-2.00264	-1.0019	0.0885864	0.864694	down	19.2322	38.7574	24.599	21.3455	18.3679	12.6166	75.0596	25.4369	29.8621	21.2122	5.91413	75.0596
AMPD1	1.15322	0.205674	0.942453	1	up	0.381169	0.351582	0	1.52468	0	0	0	0.687484	1.42201	0	0	0
NRAS	-1.41279	-0.498545	0.0130246	0.286505	down	824.56	1165.42	914.504	847.72	854.719	681.297	1470.01	1042.23	1096.37	1082.94	830.935	1470.01
CSDE1	-1.13421	-0.181694	0.296223	0.999062	down	14815.5	16804	14556.8	13510.9	18232	12962.1	18520.1	13257.4	19181.4	17484.4	13860.7	18520.1
SIKE1	-1.1034	-0.141958	0.468729	0.999062	down	498.913	550.767	501.386	565.655	555.935	372.675	580.846	567.174	617.15	585.01	373.576	580.846
SYCP1	1	0	1	1	up	0	0	0	0	0	0	0	0	0	0	0	0
TSHB	-1.05017	-0.070621	0.929687	1	down	3.53445	3.75699	4.341	1.52468	2.44905	5.82305	1.15476	2.06245	5.68802	5.58215	6.89981	1.15476
TSPAN2	1.03249	0.0461344	0.91078	0.999062	up	3140	3040.99	1848.54	1768.62	5069.54	3873.3	1920.37	1557.84	4428.12	4523.78	3895.44	1920.37
NGF	1	0	1	1	up	0	0	0	0	0	0	0	0	0	0	0	0
VANGL1	1.50129	0.586203	0.378924	0.999062	up	12.2066	7.99118	10.129	22.1078	9.79621	6.79356	3.46429	16.4996	2.84401	16.7465	4.92844	3.46429
CASQ2	1	0	1	1	up	0	0	0	0	0	0	0	0	0	0	0	0
NHLH2	1.39691	0.482236	0.881169	1	up	0.306132	0	0	0	1.22453	0	0	0	0	0	0	0
LOC101928995	1.22641	0.29444	0.869951	1	up	0.804671	0.703163	0.7235	1.52468	0	0.970509	0	1.37497	2.84401	0	0	0
LOC101928977	1.46353	0.549448	0.765744	1	up	0.868176	0.529814	0.7235	1.52468	1.22453	0	0	2.06245	0	1.11643	0	0
SLC22A15	1.1314	0.178113	0.231197	0.999062	up	1332.57	1177.35	1324.01	1291.4	1264.94	1449.94	1004.64	1216.16	1104.9	1274.96	1458.82	1004.64
MAB21L3	-1.15922	-0.213155	0.35815	0.999062	down	1977.33	2292.07	2035.93	1716.02	2108.63	2048.74	3131.72	1856.89	1574.16	2001.76	2056.14	3131.72
ATP1A1	-1.38966	-0.474737	0.0115646	0.263539	down	2369.6	3293.41	2401.3	3037.92	2184.55	1854.64	3725.26	3770.85	2977.68	2812.29	2749.08	3725.26
ATP1A1-AS1	-1.51416	-0.598513	0.119236	0.952886	down	11.5007	17.461	9.4055	13.7221	7.34716	15.5281	20.7857	19.937	14.2201	12.2807	16.7567	20.7857
LOC101929023	1.00977	0.0140327	0.981623	0.999062	up	7.63021	7.87469	11.576	10.6727	2.44905	5.82305	3.46429	6.87484	15.6421	8.93144	8.87119	3.46429
CD58	-1.27048	-0.345378	0.0918015	0.878521	down	1688.27	2145.34	1599.66	1390.51	1802.5	1960.43	2025.45	1519.34	3008.96	2215	2077.83	2025.45
MIR548AC	-1.73579	-0.79559	0.402946	1	down	1.77868	3.15815	2.1705	1.52468	2.44905	0.970509	1.15476	2.06245	8.53203	1.11643	4.92844	1.15476
IGSF3	1.77475	0.82762	0.671669	1	up	0.677591	0.351582	0.7235	0.762338	1.22453	0	0	0.687484	1.42201	0	0	0
MIR320B1	1	0	1	1	up	0	0	0	0	0	0	0	0	0	0	0	0
C1orf137	1	0	1	1	up	0	0	0	0	0	0	0	0	0	0	0	0
CD2	1.48371	0.569206	0.554075	0.999062	up	292.496	197.036	189.557	568.704	389.399	22.3217	129.333	469.552	78.2103	363.956	11.8283	129.333
PTGFRN	2.12679	1.08868	0.302169	1	up	3.57328	1.63792	1.447	4.57403	2.44905	5.82305	0	1.37497	1.42201	1.11643	5.91413	0
CD101	-2.03934	-1.0281	0.299648	0.999062	down	247.611	505.028	496.321	53.3637	276.743	164.016	1226.36	67.3734	39.8162	286.923	183.338	1226.36
LOC101929099	-1.4381	-0.524162	0.708192	1	down	1.51664	2.16229	3.6175	0	2.44905	0	4.61905	2.74994	0	0	0.985688	4.61905
TTF2	-1.15211	-0.20428	0.528657	0.999062	down	70.42	81.0604	66.562	89.1936	78.3697	47.5549	113.167	92.8103	54.0362	65.8694	47.313	113.167
MIR942	-1.64717	-0.719993	0.823388	1	down	0	0.114581	0	0	0	0	0	0.687484	0	0	0	0
TRIM45	-1.13898	-0.187743	0.428454	0.999062	down	184.419	210.313	173.64	156.279	145.719	262.037	187.072	193.183	275.869	166.348	252.336	187.072
VTCN1	1	0	1	1	up	0	0	0	0	0	0	0	0	0	0	0	0
LINC01525	1	0	1	1	up	0	0	0	0	0	0	0	0	0	0	0	0
MAN1A2	-1.03739	-0.0529591	0.808358	0.999062	down	632.131	655.242	459.423	696.015	841.25	531.839	691.703	634.548	608.618	814.994	489.887	691.703
LOC100996263	-2.71665	-1.44183	0.654472	1	down	0	0.343742	0	0	0	0	0	2.06245	0	0	0	0
FAM46C	1.08738	0.120862	0.761359	0.999062	up	1685.22	1549.52	1587.36	2476.84	1852.71	823.962	1785.26	2616.56	736.599	1606.54	766.865	1785.26
GDAP2	-1.00026	-0.000374284	0.99793	0.999565	down	1628.9	1629.38	1463.64	1744.23	1460.86	1846.88	1620.13	1768.9	1778.93	1292.83	1695.38	1620.13
WDR3	-1.08032	-0.11146	0.69719	0.999062	down	93.4062	100.604	57.88	108.252	83.2678	124.225	122.405	99.6852	58.3022	90.4309	110.397	122.405
SPAG17	4.93172	2.30209	0.463497	1	up	0.974013	0	1.447	0	2.44905	0	0	0	0	0	0	0
TBX15	1	0	1	1	up	0	0	0	0	0	0	0	0	0	0	0	0
WARS2	1.10806	0.148034	0.838143	0.999062	up	22.3291	19.9381	11.576	44.2156	30.6132	2.91153	12.7024	51.5613	9.95404	26.7943	5.91413	12.7024
WARS2-IT1	-1.208	-0.27262	0.177775	0.999062	down	106.76	129.62	108.525	100.629	105.309	112.579	117.786	114.122	190.549	117.225	120.254	117.786
LOC101929147	-1.24176	-0.312385	0.0725809	0.786832	down	471.053	585.118	452.188	399.465	462.871	569.689	580.846	512.176	718.113	471.134	647.597	580.846
HAO2	1	0	1	1	up	0	0	0	0	0	0	0	0	0	0	0	0
HAO2-IT1	1	0	1	1	up	0	0	0	0	0	0	0	0	0	0	0	0
HSD3B2	1.11993	0.163409	0.956083	1	up	0.36175	0.278862	1.447	0	0	0	0	0.687484	0	0	0.985688	0
HSD3B1	-1.14938	-0.200851	0.906003	1	down	0.614087	0.774654	0.7235	0.762338	0	0.970509	0	0.687484	2.84401	1.11643	0	0
HSD3BP4	-1.49097	-0.576253	0.0884404	0.864694	down	69.5028	103.618	61.4975	56.413	74.6961	85.4048	160.512	72.1858	86.7423	82.6159	59.1413	160.512
LINC00622	-1.10114	-0.138997	0.873897	0.999062	down	8.39088	9.41466	8.682	19.0585	0	5.82305	9.2381	13.0622	17.0641	0	7.8855	9.2381
ZNF697	-2.45112	-1.29344	0.00453684	0.133311	down	158.013	388.444	234.414	198.97	73.4716	125.196	329.107	353.367	910.083	209.889	199.109	329.107
PHGDH	1.1233	0.167739	0.837633	0.999062	up	6.52993	5.64737	3.6175	13.7221	4.8981	3.88203	2.30953	18.5621	4.26602	4.46572	1.97138	2.30953
HMGCS2	-1.41754	-0.503388	0.87592	1	down	0.242627	0.328563	0	0	0	0.970509	0	0	0	0	1.97138	0
REG4	1.271	0.345968	0.828654	1	up	1.73635	1.31719	1.447	3.04935	2.44905	0	0	3.43742	0	4.46572	0	0
NBPF7	-1.26672	-0.341095	0.329041	0.999062	down	69.6818	89.1046	119.378	68.6104	25.7151	65.0241	91.2263	81.8106	106.65	68.1023	95.6117	91.2263
ADAM30	3.4975	1.80633	0.569069	1	up	0.687301	0	0	1.52468	1.22453	0	0	0	0	0	0	0
NOTCH2	1.02873	0.0408678	0.848725	0.999062	up	31923.9	31032.9	36264	27302.4	28262.1	35867.1	24933.6	26899.9	44261.3	28532.6	36636	24933.6
SEC22B	-1.18498	-0.244865	0.17905	0.999062	down	2526.3	2994.74	3259.37	2429.57	2187	2229.26	3147.88	2864.06	3591.99	2250.72	2965.93	3147.88
PFN1P2	-1.21985	-0.286698	0.581453	0.999062	down	43.8615	53.4377	36.8985	74.7092	55.1037	8.73458	66.9762	79.7481	36.9721	50.2394	19.7138	66.9762
NBPF8	-1.0958	-0.131982	0.604286	0.999062	down	1731.54	1898.18	2381.76	1212.88	1406.98	1924.52	2060.1	1328.22	2460.07	1423.45	2057.13	2060.1
RNVU1-19	1.4293	0.515308	0.716397	1	up	1.27226	0.938936	2.894	0	1.22453	0.970509	0	0.687484	2.84401	1.11643	0.985688	0
PPIAL4A	-1.3822	-0.466966	0.310785	0.999062	down	7.79598	10.8943	10.8525	8.38572	6.12263	5.82305	12.7024	14.4372	9.95404	6.69858	8.87119	12.7024
LINC00623	1.10072	0.138454	0.38766	0.999062	up	662.266	601.754	686.602	785.971	651.448	525.045	639.739	673.047	541.784	609.571	506.644	639.739
RNVU1-20	1	0	1	1	up	0	0	0	0	0	0	0	0	0	0	0	0
RNVU1-4	1	0	1	1	up	0	0	0	0	0	0	0	0	0	0	0	0
FCGR1B	7.22525	2.85305	5.66091e-29	8.15068e-26	up	9702.62	1342.63	8020.72	7446.52	9921.11	13422.1	1120.12	1352.28	1328.15	1040.51	2094.59	1120.12
HIST2H2BA	1.09009	0.124444	0.702902	0.999062	up	137.871	126.51	147.594	86.1442	198.373	119.373	95.8453	81.1231	176.329	188.677	121.24	95.8453
FAM72B	1.01428	0.0204551	0.973301	0.999062	up	6.48824	6.22851	2.894	3.81169	8.57168	10.6756	5.77381	6.18736	8.53203	2.23286	8.87119	5.77381
SRGAP2C	1.05604	0.078661	0.709623	0.999062	up	524.046	495.675	535.39	495.52	667.367	397.909	556.596	514.926	356.923	583.893	405.118	556.596
SRGAP2-AS1	1.0319	0.0453068	0.91746	0.999062	up	14.7995	14.3367	18.811	10.6727	12.2453	17.4692	21.9405	15.1246	7.11003	10.0479	9.85688	21.9405
EMBP1	-1.22154	-0.288699	0.230242	0.999062	down	909.393	1110.92	675.026	815.702	973.498	1173.35	1207.88	721.171	1382.19	863.001	1283.37	1207.88
LOC645166	1.08526	0.11804	0.522291	0.999062	up	1672.33	1540.88	1604	1427.86	1551.47	2106	1382.25	1291.09	1507.33	1656.78	2025.59	1382.25
RNVU1-17	1	0	1	1	up	0	0	0	0	0	0	0	0	0	0	0	0
LOC388692	-1.29587	-0.373916	0.344333	0.999062	down	14.4811	18.6777	20.9815	14.4844	14.6943	7.76407	18.4762	25.4369	11.376	15.63	22.6708	18.4762
FAM231D	1	0	1	1	up	0	0	0	0	0	0	0	0	0	0	0	0
FCGR1C	7.99977	2.99996	1.26609e-42	4.01047e-39	up	4882.52	609.812	4478.47	4281.29	5514.04	5256.28	583.155	658.61	490.592	436.524	906.833	583.155
FAM72C	1.01488	0.0213044	0.971738	0.999062	up	5.52138	5.40774	4.341	5.33637	3.67358	8.73458	3.46429	6.18736	7.11003	3.34929	8.87119	3.46429
SRGAP2D	1.0183	0.0261655	0.86817	0.999062	up	414.915	407.128	404.437	415.474	497.158	342.59	445.738	369.866	359.767	451.038	370.619	445.738
LOC101060524	1	0	1	1	up	0	0	0	0	0	0	0	0	0	0	0	0
DRD5P2	1	0	1	1	up	0	0	0	0	0	0	0	0	0	0	0	0
PPIAL4F	1	0	1	1	up	0	0	0	0	0	0	0	0	0	0	0	0
PPIAL4D	1	0	1	1	up	0	0	0	0	0	0	0	0	0	0	0	0
PPIAL4E	1	0	1	1	up	0	0	0	0	0	0	0	0	0	0	0	0
RNVU1-15	1.6775	0.74631	0.811287	1	up	0.433212	0.114581	0	0.762338	0	0.970509	0	0.687484	0	0	0	0
NBPF15	-1.0201	-0.0287129	0.896812	0.999062	down	1771.91	1808.24	2275.41	1305.12	1481.68	2025.45	1763.32	1386.66	2273.79	1519.46	2142.89	1763.32
SRGAP2B	-1.04477	-0.0631798	0.721442	0.999062	down	1772.4	1851.79	1764.62	1798.36	1987.41	1539.23	2256.41	1667.15	1635.31	1871.14	1424.32	2256.41
FAM72D	-1.39066	-0.475765	0.504135	0.999062	down	4.71313	6.29205	2.1705	3.04935	4.8981	8.73458	3.46429	8.24981	1.42201	12.2807	8.87119	3.46429
LOC103091866	1.05455	0.0766231	0.697193	0.999062	up	236.538	223.841	266.248	237.85	259.6	182.456	220.56	261.931	166.375	273.525	200.095	220.56
RNVU1-14	-3.54406	-1.8254	0.216384	1	down	0.433212	1.61427	0	0.762338	0	0.970509	2.30953	0.687484	1.42201	0	2.95706	2.30953
NBPF20	-1.11183	-0.152931	0.479565	0.999062	down	7189.76	7994.51	8873.73	5474.35	6221.82	8189.15	8892.83	5756.99	9392.35	6273.22	8758.82	8892.83
NBPF25P	-1.0338	-0.0479524	0.839158	0.999062	down	1376.59	1423.74	1771.85	987.99	1169.42	1577.08	1404.19	1025.04	1786.04	1156.62	1766.35	1404.19
GPR89A	-1.00882	-0.0126681	0.975083	0.999062	down	63.5651	64.2126	65.115	97.5793	62.4508	29.1153	83.1429	80.4356	46.9262	66.9858	24.6422	83.1429
PDZK1	-1.10316	-0.141642	0.801137	0.999062	down	9.18029	10.4835	10.129	12.1974	8.57168	5.82305	13.8572	4.81239	18.4861	8.93144	2.95706	13.8572
CD160	1.83583	0.876432	0.318157	0.999062	up	31.7187	17.1465	22.4285	65.5611	33.0622	5.82305	11.5476	45.3739	4.26602	30.1436	0	11.5476
RNF115	1.20978	0.27474	0.419382	0.999062	up	193.261	159.804	201.857	250.809	220.415	99.9624	230.953	147.122	96.6964	149.602	103.497	230.953
POLR3C	1.78954	0.839589	0.0200141	0.386565	up	330.551	184.822	358.133	381.931	373.48	208.659	284.072	165.684	135.091	164.115	75.898	284.072
NUDT17	1.73706	0.796645	0.0996829	0.903023	up	14.6983	8.43501	22.4285	19.0585	8.57168	8.73458	8.08334	12.3747	4.26602	8.93144	8.87119	8.08334
PIAS3	1.08047	0.111656	0.579127	0.999062	up	249.31	230.869	337.875	245.473	231.435	182.456	220.56	270.181	201.925	251.197	220.794	220.56
MIR6736	1	0	1	1	up	0	0	0	0	0	0	0	0	0	0	0	0
ANKRD35	1.39691	0.482236	0.881169	1	up	0.180875	0	0.7235	0	0	0	0	0	0	0	0	0
ITGA10	1.28575	0.362608	0.555468	0.999062	up	15.6098	12.2176	17.364	24.3948	6.12263	14.5576	4.61905	24.0619	24.1741	8.93144	6.89981	4.61905
PEX11B	1.21347	0.279139	0.212905	0.999062	up	121.351	100.426	148.318	139.508	86.9414	110.638	110.857	98.3102	72.5223	118.342	91.669	110.857
GNRHR2	-1.08313	-0.115202	0.539227	0.999062	down	819.106	887.32	742.311	696.015	855.944	982.155	908.798	719.108	1094.94	688.838	1003.43	908.798
RBM8A	-1.26359	-0.337523	0.151459	0.999062	down	1882.41	2378.56	1843.48	1914.99	2347.42	1423.74	3038.18	1980.64	2179.93	2482.94	1551.47	3038.18
LIX1L	1.00636	0.00914188	0.945815	0.999062	up	998.267	992.844	1125.04	899.559	890.231	1078.24	950.37	978.29	1167.47	903.192	1007.37	950.37
ANKRD34A	1.50704	0.591715	0.24299	0.999062	up	13.0704	8.77966	15.917	18.2961	12.2453	5.82305	5.77381	10.3123	11.376	14.5136	4.92844	5.77381
POLR3GL	-1.20588	-0.270085	0.545911	0.999062	down	259.915	313.411	295.188	236.325	400.42	107.726	495.393	206.245	234.631	339.395	109.411	495.393
TXNIP	-1.4421	-0.528173	0.0432235	0.603505	down	102228	147424	121147	120136	104180	63448.9	158234	154958	191089	137864	84165.9	158234
HFE2	1.00946	0.0135774	0.986628	0.999062	up	5.32021	5.45184	9.4055	3.81169	6.12263	1.94102	3.46429	5.49987	17.0641	2.23286	0.985688	3.46429
RNVU1-6	-2.8619	-1.51697	0.637647	1	down	0	0.393443	0	0	0	0	0	1.37497	0	0	0.985688	0
LOC101928979	1.3626	0.446361	0.655419	1	up	2.72372	1.99375	3.6175	5.33637	0	1.94102	2.30953	4.1249	0	2.23286	0.985688	2.30953
NBPF10	-1.11799	-0.160911	0.422089	0.999062	down	6260.14	6999.51	7637.99	4783.67	5854.46	6764.45	7951.7	5112.82	7943.32	5780.88	7256.63	7951.7
NOTCH2NL	-1.349	-0.431895	0.129118	0.970227	down	1434.9	1936.36	1575.06	1145.03	1175.55	1843.97	1702.12	1615.59	3475.38	1391.07	1731.85	1702.12
NUDT4P2	1	0	1	1	up	0	0	0	0	0	0	0	0	0	0	0	0
NUDT4P1	1	0	1	1	up	0	0	0	0	0	0	0	0	0	0	0	0
CH17-408M7.1	2.9422	1.55689	0.625545	1	up	0.552335	0	1.447	0.762338	0	0	0	0	0	0	0	0
HYDIN2	1.05126	0.0721128	0.920034	1	up	4.50679	4.48131	2.894	6.86104	2.44905	5.82305	3.46429	3.43742	9.95404	5.58215	0.985688	3.46429
NBPF12	-1.02257	-0.0322005	0.869708	0.999062	down	1549.84	1585.54	2004.1	1178.58	1367.8	1648.89	1802.58	1262.22	1673.7	1340.83	1631.31	1802.58
LOC728989	1.67478	0.743973	0.31391	0.999062	up	8.604	5.13777	15.1935	3.81169	13.4698	1.94102	5.77381	2.74994	1.42201	11.1643	3.94275	5.77381
RNVU1-8	1	0	1	1	up	0	0	0	0	0	0	0	0	0	0	0	0
NBPF13P	1.51493	0.599251	0.534783	1	up	4.20415	2.83565	6.5115	2.28701	1.22453	6.79356	0	2.06245	5.68802	3.34929	5.91413	0
PRKAB2	-1.10941	-0.149794	0.709857	0.999062	down	174.989	194.252	241.649	175.338	189.802	93.1688	309.476	189.058	115.182	158.533	83.7835	309.476
PDIA3P1	-1.34525	-0.427877	0.159442	0.999062	down	314.275	422.632	269.866	315.608	421.237	250.391	614.334	292.181	322.795	430.942	261.207	614.334
FMO5	-1.2735	-0.348804	0.499731	0.999062	down	33.2519	42.5764	52.8155	33.5429	33.0622	13.5871	64.6667	32.3117	27.0181	56.938	9.85688	64.6667
CHD1L	-1.08645	-0.119617	0.799615	0.999062	down	76.6399	83.3118	85.373	121.212	79.5942	20.3807	105.083	105.873	45.5042	103.828	34.4991	105.083
LINC00624	1.91671	0.93863	0.0219524	0.404282	up	27.4174	14.5365	31.834	37.3546	22.0415	18.4397	13.8572	16.4996	21.3301	16.7465	4.92844	13.8572
BCL9	-1.58303	-0.662686	0.00907377	0.224547	down	470.228	744.085	476.063	337.716	606.14	460.992	550.822	662.047	1082.15	902.076	716.595	550.822
ACP6	-2.01966	-1.01411	0.00130529	0.0515543	down	74.7775	152.21	101.29	73.9468	40.4094	83.4637	145.5	132.684	240.319	91.5473	157.71	145.5
GJA5	1	0	1	1	up	0	0	0	0	0	0	0	0	0	0	0	0
GJA8	1	0	1	1	up	0	0	0	0	0	0	0	0	0	0	0	0
GPR89B	-1.14161	-0.191072	0.661313	0.999062	down	60.615	69.0302	44.857	87.6689	80.8187	29.1153	97.0001	89.3729	42.6602	62.5201	25.6279	97.0001
PDZK1P1	-1.08605	-0.119091	0.88186	1	down	2.82956	3.27081	4.341	3.81169	1.22453	1.94102	2.30953	2.74994	5.68802	5.58215	0.985688	2.30953
RNVU1-7	-3.51978	-1.81548	0.0476511	0.631012	down	3.3589	11.7313	5.788	2.28701	2.44905	2.91153	4.61905	43.3115	5.68802	11.1643	0.985688	4.61905
NBPF11	-1.00753	-0.0108267	0.957207	0.999062	down	1321.74	1332.53	1651.03	1028.39	1149.83	1457.7	1370.7	1003.04	1629.62	1137.64	1483.46	1370.7
LOC101927468	1.49614	0.581249	0.365107	0.999062	up	5.93875	4.0832	7.235	5.33637	2.44905	8.73458	3.46429	2.74994	5.68802	2.23286	6.89981	3.46429
MIR5087	-1.54802	-0.63042	0.693802	1	down	0.604377	0.942645	1.447	0	0	0.970509	1.15476	1.37497	0	0	1.97138	1.15476
RNVU1-1	-2.78097	-1.47559	0.419534	1	down	0.548759	1.2954	0	0	1.22453	0.970509	0	3.43742	0	3.34929	0.985688	0
MIR6077	-5.33434	-2.41531	0.348449	1	down	0	0.884423	0	0	0	0	2.30953	0.687484	0	0	0	2.30953
RNU1-13P	-1.4067	-0.492319	0.669363	1	down	1.49197	2.14099	0.7235	3.04935	1.22453	0.970509	4.61905	1.37497	0	2.23286	0	4.61905
LOC100132057	-1.47254	-0.558302	0.0164281	0.339672	down	76.5798	112.634	71.6265	74.7092	88.1659	71.8176	108.548	126.497	143.623	120.575	68.0125	108.548
RNVU1-3	-1.04266	-0.0602669	0.940338	1	down	3.54956	3.89767	3.6175	8.38572	1.22453	0.970509	4.61905	4.1249	5.68802	3.34929	0.985688	4.61905
LINC01138	-1.00004	-5.79146e-05	0.999716	0.999905	down	459.247	459.862	503.556	513.054	371.031	449.346	411.096	534.863	528.986	410.846	462.288	411.096
PPIAL4G	-1.03641	-0.0515974	0.868507	0.999062	down	19.2701	19.8996	16.6405	23.6325	18.3679	18.4397	21.9405	21.312	15.6421	17.8629	20.6994	21.9405
NBPF14	-1.05702	-0.0799992	0.664881	0.999062	down	7158.82	7567.61	8261.65	5429.37	7262.66	7681.58	7451.68	5669.68	9429.32	7204.33	8198.95	7451.68
PDE4DIP	1.14446	0.194671	0.465074	0.999062	up	309.973	270.266	266.972	348.389	287.764	336.767	255.203	327.93	129.402	289.156	364.704	255.203
LOC653513	-2.06565	-1.04659	0.0467973	0.62336	down	7.90708	16.317	2.1705	11.4351	7.34716	10.6756	23.0953	14.4372	18.4861	8.93144	9.85688	23.0953
NBPF9	-1.00716	-0.010286	0.962141	0.999062	down	2035.86	2051.17	2579.28	1511.72	1757.2	2295.25	2131.69	1527.59	2551.08	1671.3	2293.7	2131.69
PPIAL4C	-1.24281	-0.313605	0.473881	0.999062	down	12.6264	15.7314	11.576	15.2468	15.9188	7.76407	24.25	12.3747	11.376	12.2807	9.85688	24.25
LINC00869	-1.00428	-0.006163	0.969707	0.999062	down	654.93	657.706	713.371	743.28	642.876	520.193	662.834	742.483	551.738	745.776	580.57	662.834
HIST2H2BF	1.4315	0.517528	0.0928208	0.880076	up	675.751	472.142	740.864	471.125	764.104	726.911	278.298	417.99	666.921	678.79	512.558	278.298
FCGR1A	6.01636	2.58889	3.14557e-33	5.5355e-30	up	6531.85	1085.39	5903.76	5876.1	6837.75	7509.8	946.906	1183.85	1167.47	733.495	1533.73	946.906
HIST2H3D	1.19641	0.258708	0.550173	0.999062	up	16.5273	14.0331	26.046	15.2468	7.34716	17.4692	13.8572	13.7497	14.2201	7.81501	20.6994	13.8572
HIST2H4B	1	0	1	1	up	0	0	0	0	0	0	0	0	0	0	0	0
HIST2H4A	1	0	1	1	up	0	0	0	0	0	0	0	0	0	0	0	0
HIST2H3A	1	0	1	1	up	0	0	0	0	0	0	0	0	0	0	0	0
HIST2H3C	1	0	1	1	up	0	0	0	0	0	0	0	0	0	0	0	0
HIST2H2AA3	1	0	1	1	up	0	0	0	0	0	0	0	0	0	0	0	0
HIST2H2AA4	1	0	1	1	up	0	0	0	0	0	0	0	0	0	0	0	0
HIST2H2BC	-1.03295	-0.0467712	0.886478	0.999062	down	199.017	205.904	223.562	184.486	162.862	225.158	114.322	205.558	352.657	194.259	254.307	114.322
HIST2H2BE	1.10232	0.140539	0.627267	0.999062	up	5249.16	4762.16	6020.97	3427.47	5853.24	5694.95	3310.71	3371.42	7043.19	5836.7	5700.23	3310.71
HIST2H2AC	1.08044	0.111624	0.735258	0.999062	up	552.149	511.223	685.878	290.451	700.429	531.839	372.988	325.867	784.947	657.578	552.971	372.988
HIST2H2AB	1.32516	0.40617	0.2974	0.999062	up	34.5308	25.8189	46.304	16.0091	37.9603	37.8498	16.1667	30.9368	24.1741	29.0272	38.4418	16.1667
BOLA1	-1.64849	-0.721148	0.238595	0.999062	down	8.20547	13.8142	13.023	12.9598	4.8981	1.94102	19.631	18.5621	9.95404	11.1643	3.94275	19.631
SV2A	1.06735	0.094033	0.796607	0.999062	up	26.3736	24.4122	23.152	35.0676	22.0415	25.2332	25.4048	40.5616	12.798	24.5615	17.7424	25.4048
SF3B4	1.11686	0.159451	0.550569	0.999062	up	2051.78	1836.81	1767.51	1819.7	2013.12	2606.79	1167.47	1865.14	1921.13	2380.23	2519.42	1167.47
MTMR11	1.24846	0.320155	0.602856	0.999062	up	21.0844	16.671	26.046	25.9195	11.0207	21.3512	5.77381	35.7492	5.68802	14.5136	32.5277	5.77381
OTUD7B	1.29592	0.373974	0.412851	0.999062	up	37.199	28.4082	39.7925	40.4039	45.3075	23.2922	23.0953	46.0614	9.95404	52.4722	15.771	23.0953
VPS45	1.07294	0.101573	0.777528	0.999062	up	41.521	38.6116	40.516	60.9871	30.6132	33.9678	28.8691	63.936	34.1281	50.2394	25.6279	28.8691
PLEKHO1	-1.00972	-0.0139583	0.937271	0.999062	down	3779.71	3816.66	4505.23	4025.15	2884.98	3703.46	3427.34	4838.51	3505.24	4160.94	3540.59	3427.34
ANP32E	-1.34283	-0.425274	0.219968	0.999062	down	333.826	448.43	316.17	390.317	383.277	245.539	718.262	330.68	359.767	334.929	228.68	718.262
CA14	-1.16877	-0.224995	0.686609	0.999062	down	15.9668	18.9117	16.6405	12.1974	9.79621	25.2332	8.08334	8.93729	39.8162	18.9793	29.5706	8.08334
APH1A	1.16368	0.218695	0.3539	0.999062	up	1842.03	1582.86	2185.69	1716.02	1406.98	2059.42	1133.98	1843.14	1558.52	1642.27	2185.27	1133.98
C1orf54	-1.58445	-0.663983	0.261546	0.999062	down	5.51343	8.75373	3.6175	9.14806	7.34716	1.94102	12.7024	8.24981	7.11003	7.81501	3.94275	12.7024
CIART	1.04855	0.0683925	0.958983	1	up	1.90401	1.84212	1.447	2.28701	0	3.88203	0	3.43742	4.26602	3.34929	0	0
MRPS21	1.06828	0.0952882	0.629378	0.999062	up	179.591	167.681	169.299	191.347	217.966	139.753	161.667	190.433	162.109	202.074	128.139	161.667
PRPF3	-1.10633	-0.145785	0.341102	0.999062	down	1494.87	1653.21	1290	1560.51	1857.61	1271.37	1737.92	1553.71	1639.57	1804.15	1446	1737.92
RPRD2	1.07012	0.0977725	0.515274	0.999062	up	1472.5	1375.98	1507.05	1636.74	1556.37	1189.84	1312.97	1500.78	1358.02	1611.01	1160.15	1312.97
TARS2	1.02925	0.0415934	0.780186	0.999062	up	349.76	340.162	366.091	355.25	291.437	386.262	324.488	367.116	366.877	282.457	375.547	324.488
MIR6878	-1.64717	-0.719993	0.823388	1	down	0	0.114581	0	0	0	0	0	0.687484	0	0	0	0
ECM1	1.12014	0.163678	0.870511	0.999062	up	9.16057	8.08166	4.341	3.04935	14.6943	14.5576	0	8.24981	14.2201	3.34929	22.6708	0
FALEC	1.54286	0.625605	0.273011	0.999062	up	10.4358	6.55721	10.8525	10.6727	8.57168	11.6461	3.46429	10.9997	4.26602	3.34929	13.7996	3.46429
ADAMTSL4	1.04323	0.0610538	0.876437	0.999062	up	7183.43	6885.76	6125.15	5023.81	6480.19	11104.6	3318.79	5699.24	10229.9	7255.68	11492.1	3318.79
MIR4257	1.02262	0.0322748	0.954056	0.999062	up	165.114	161.412	121.548	103.678	151.841	283.389	39.2619	131.309	254.539	188.677	315.42	39.2619
ADAMTSL4-AS1	-1.00112	-0.00161157	0.995846	0.999565	down	1921.69	1923.89	1797.17	1352.39	1418	3119.22	1541.61	1505.59	2253.88	1615.48	3085.2	1541.61
MCL1	-1.00217	-0.00312528	0.991262	0.999292	down	120217	120477	103458	90145.7	99737.7	187526	106713	93600.3	114265	103399	198174	106713
ENSA	-1.05883	-0.0824684	0.70024	0.999062	down	3117.68	3300.54	2580.72	2387.64	4104.61	3397.75	3101.69	2487.32	3340.29	4327.28	3444.98	3101.69
GOLPH3L	-1.09122	-0.125939	0.791993	0.999062	down	431.184	470.537	338.598	243.186	227.762	915.19	472.298	224.12	445.088	252.313	957.103	472.298
HORMAD1	-1.20876	-0.27353	0.609115	0.999062	down	163.624	197.808	133.848	60.2247	95.513	364.911	263.286	65.9985	167.797	98.2459	328.234	263.286
CTSS	-1.0709	-0.0988297	0.517214	0.999062	down	79190.5	84805.6	75149.9	74269.3	82929.8	84412.9	99958.6	69752.1	83055.1	71137.8	84971.2	99958.6
CTSK	1.01871	0.0267394	0.926498	0.999062	up	211.942	208.414	272.036	134.934	150.617	290.182	226.334	160.871	236.053	140.67	260.222	226.334
ARNT	-1.0567	-0.0795654	0.579352	0.999062	down	1768.26	1869.38	2050.4	1627.59	1872.3	1522.73	1948.08	1621.77	2078.97	1977.2	1642.16	1948.08
SETDB1	1.08208	0.113812	0.25426	0.999062	up	1539.43	1423.5	1660.43	1478.94	1469.43	1548.93	1337.22	1416.9	1548.56	1508.3	1392.78	1337.22
CERS2	1.12186	0.165889	0.175527	0.999062	up	5231.91	4664	6013.73	4909.46	4741.37	5263.07	4221.81	4766.33	4782.2	4788.37	5203.45	4221.81
ANXA9	-1.12782	-0.173533	0.522494	0.999062	down	736.415	830.818	748.823	895.747	456.748	844.343	718.262	1036.73	961.276	495.695	1054.69	718.262
FAM63A	1.02669	0.0379957	0.872661	0.999062	up	5693.53	5545.77	6282.87	5998.84	4174.41	6318.01	4120.19	6841.15	7063.1	4432.23	6697.75	4120.19
PRUNE	1.02365	0.0337204	0.903731	0.999062	up	913.895	892.666	821.173	859.918	755.533	1218.96	587.774	897.854	991.138	873.049	1418.4	587.774
BNIPL	-1.14508	-0.195445	0.331018	0.999062	down	255.254	292.928	272.036	253.859	173.883	321.238	284.072	302.493	338.437	231.101	317.391	284.072
C1orf56	-1.54192	-0.624728	0.0408575	0.585612	down	85.4172	132.506	87.5435	83.0949	75.9206	95.1099	122.405	83.8731	244.585	126.157	95.6117	122.405
CDC42SE1	1.00926	0.0132919	0.937764	0.999062	up	31372.1	31084.8	34333	28805	25671	36679.4	26893.3	30146.9	34790.8	29238.2	38546.3	26893.3
MLLT11	-1.29008	-0.367459	0.0910503	0.874646	down	136.476	176.87	172.193	131.122	126.126	116.461	211.322	156.746	199.081	125.04	157.71	211.322
GABPB2	-1.16691	-0.222688	0.462483	0.999062	down	92.464	107.791	90.4375	105.965	101.636	71.8176	137.417	114.81	63.9902	133.972	59.1413	137.417
SEMA6C	1.14046	0.189611	0.574901	0.999062	up	49.0887	43.05	45.5805	76.9962	28.1641	45.6139	39.2619	55.6862	24.1741	53.5887	46.3273	39.2619
TNFAIP8L2-SCNM1	1	0	1	1	up	0	0	0	0	0	0	0	0	0	0	0	0
TNFAIP8L2	1.86261	0.897327	0.0117567	0.266767	up	1341.23	720.225	1465.81	1058.89	2220.07	620.155	772.536	550.675	988.294	844.022	393.289	772.536
LYSMD1	1.56012	0.641657	0.0603428	0.716628	up	700.003	448.971	746.652	663.997	947.783	441.581	568.143	371.241	668.343	307.018	210.937	568.143
SCNM1	-1.02376	-0.0338803	0.898203	0.999062	down	37.6171	38.4049	28.94	38.1169	46.532	36.8793	39.2619	27.4994	36.9721	48.0065	39.4275	39.2619
TMOD4	1.00957	0.013745	0.974275	0.999062	up	15.7998	15.5445	10.129	15.2468	23.266	14.5576	9.2381	15.1246	27.0181	17.8629	14.7853	9.2381
VPS72	1.11351	0.15512	0.451853	0.999062	up	354.909	318.497	389.967	343.815	307.356	378.498	351.048	319.68	190.549	318.183	380.476	351.048
PIP5K1A	1.52247	0.606411	0.000268696	0.014574	up	2549.62	1674.39	2476.54	2668.18	3136.01	1917.73	1498.88	1620.4	1766.13	1752.8	1909.28	1498.88
PSMD4	1.06415	0.0896994	0.604399	0.999062	up	1590.83	1495.59	2027.25	1600.91	1334.73	1400.44	1727.53	1513.15	1302.56	1355.35	1347.44	1727.53
ZNF687	1.04454	0.0628682	0.765331	0.999062	up	3057.94	2927.32	3056.06	2733.75	2889.88	3552.06	2103.98	3044.18	3061.58	3572.58	3677.6	2103.98
PI4KB	1.0504	0.0709398	0.63249	0.999062	up	2933.38	2793.44	3714.45	2858.01	2703.75	2457.33	2952.73	2865.43	2778.6	2767.63	2443.52	2952.73
RFX5	-1.39113	-0.476259	0.158884	0.999062	down	525.791	731.121	500.662	519.915	806.963	275.624	640.893	749.358	770.727	1185.65	399.204	640.893
GBAT2	-1.04702	-0.0662871	0.93584	1	down	3.56525	3.66005	2.894	3.04935	7.34716	0.970509	1.15476	4.81239	8.53203	3.34929	2.95706	1.15476
SELENBP1	1.30546	0.384555	0.888523	1	up	0.548759	0.372144	0	0	1.22453	0.970509	0	0	0	2.23286	0	0
PSMB4	1.00964	0.0138398	0.927404	0.999062	up	2043.14	2023.64	1990.35	1765.58	2254.35	2162.29	1849.93	1662.34	2218.33	2394.74	2166.54	1849.93
POGZ	-1.32157	-0.402257	0.0903868	0.87077	down	4121.75	5447.29	4286.01	3986.27	5381.79	2832.91	5181.42	4846.07	7273.56	6450.74	3750.54	5181.42
CGN	-4.71949	-2.23863	0.150961	1	down	0.487007	2.07925	0.7235	0	1.22453	0	3.46429	4.1249	1.42201	0	0	3.46429
TUFT1	-1.21958	-0.286381	0.0923867	0.880076	down	628.729	767.544	698.178	677.719	587.773	551.249	778.31	860.73	934.258	655.345	598.313	778.31
MIR554	1.18885	0.24957	0.916205	1	up	0.487007	0.300652	0.7235	0	1.22453	0	0	0.687484	0	1.11643	0	0
SNX27	1.05356	0.0752675	0.756516	0.999062	up	5370.28	5097.73	5795.24	5997.32	3649.09	6039.48	3995.48	5836.05	6875.4	3833.82	6050.15	3995.48
CELF3	-1.82336	-0.866599	0.0140677	0.302722	down	23.7078	43.224	17.364	26.6818	34.2867	16.4986	43.881	30.9368	72.5223	34.6093	33.5134	43.881
RIIAD1	-1.64717	-0.719993	0.823388	1	down	0	0.237001	0	0	0	0	0	0	1.42201	0	0	0
MRPL9	1.16408	0.219189	0.752311	0.999062	up	37.4524	31.9989	21.705	69.3728	53.8792	4.85254	28.8691	64.6235	11.376	51.3558	6.89981	28.8691
OAZ3	-1.03852	-0.0545319	0.967489	1	down	1.35343	1.34756	0.7235	1.52468	1.22453	1.94102	0	4.1249	2.84401	1.11643	0	0
TDRKH	-1.27203	-0.347133	0.574114	0.999062	down	12.1141	15.5363	10.129	25.1572	7.34716	5.82305	18.4762	24.7494	12.798	16.7465	1.97138	18.4762
LINGO4	-1.35426	-0.437502	0.892079	1	down	0.190585	0.229161	0	0.762338	0	0	0	1.37497	0	0	0	0
RORC	-1.06703	-0.0936006	0.91743	0.999062	down	15.4494	16.5222	13.7465	41.9286	6.12263	0	11.5476	40.5616	15.6421	17.8629	1.97138	11.5476
C2CD4D	1.49472	0.579875	0.770326	1	up	1.88643	1.2173	1.447	6.09871	0	0	0	6.18736	0	1.11643	0	0
LOC100132111	1.56374	0.645004	0.656789	1	up	3.84847	2.38466	0.7235	6.09871	8.57168	0	0	6.18736	1.42201	6.69858	0	0
THEM5	1.60682	0.684205	0.457393	0.999062	up	6.31088	3.74376	1.447	8.38572	13.4698	1.94102	1.15476	9.62478	2.84401	6.69858	0.985688	1.15476
THEM4	1.01428	0.0204543	0.922795	0.999062	up	274.182	270.086	232.244	333.142	259.6	271.742	213.631	356.117	321.373	237.8	277.964	213.631
S100A10	1.17094	0.227671	0.502846	0.999062	up	351.353	299.559	294.465	444.443	391.848	274.654	314.095	434.49	100.962	352.792	280.921	314.095
NBPF18P	-1.99374	-0.995476	0.0763582	0.806241	down	8.66064	17.5628	12.2995	5.33637	2.44905	14.5576	26.5595	15.8121	17.0641	5.58215	13.7996	26.5595
S100A11	-1.17579	-0.233632	0.410717	0.999062	down	48989.8	57601.8	44252.2	36125.7	53200.8	62380.4	40481.4	40369.7	86551.8	69660.8	68065.7	40481.4
LOC100131107	-1.10321	-0.141709	0.869983	1	down	2.80839	3.18359	5.0645	2.28701	0	3.88203	1.15476	3.43742	2.84401	5.58215	4.92844	1.15476
TCHHL1	1	0	1	1	up	0	0	0	0	0	0	0	0	0	0	0	0
TCHH	8.41104	3.07228	0.0385433	1	up	3.17189	0.328563	7.235	2.28701	1.22453	1.94102	0	0	0	0	1.97138	0
RPTN	1	0	1	1	up	0	0	0	0	0	0	0	0	0	0	0	0
HRNR	1.581	0.660836	0.815567	1	up	0.562044	0.229161	0.7235	1.52468	0	0	0	1.37497	0	0	0	0
FLG	1.39691	0.482236	0.881169	1	up	0.190585	0	0	0.762338	0	0	0	0	0	0	0	0
FLG-AS1	-1.26131	-0.33492	0.52898	0.999062	down	8.48948	11.0433	8.682	10.6727	4.8981	9.70509	8.08334	9.62478	24.1741	4.46572	11.8283	8.08334
FLG2	1.04306	0.060822	0.798516	0.999062	up	181.095	173.889	175.087	165.427	133.473	250.391	154.738	160.184	211.879	135.088	226.708	154.738
CRNN	1	0	1	1	up	0	0	0	0	0	0	0	0	0	0	0	0
LCE5A	1	0	1	1	up	0	0	0	0	0	0	0	0	0	0	0	0
CRCT1	1	0	1	1	up	0	0	0	0	0	0	0	0	0	0	0	0
LCE3E	1	0	1	1	up	0	0	0	0	0	0	0	0	0	0	0	0
LCE3D	1	0	1	1	up	0	0	0	0	0	0	0	0	0	0	0	0
LCE3C	1.39691	0.482236	0.881169	1	up	0.242627	0	0	0	0	0.970509	0	0	0	0	0	0
LCE3B	1	0	1	1	up	0	0	0	0	0	0	0	0	0	0	0	0
LCE3A	1	0	1	1	up	0	0	0	0	0	0	0	0	0	0	0	0
LCE2D	1	0	1	1	up	0	0	0	0	0	0	0	0	0	0	0	0
LCE2C	1	0	1	1	up	0	0	0	0	0	0	0	0	0	0	0	0
LCE2B	1	0	1	1	up	0	0	0	0	0	0	0	0	0	0	0	0
LCE2A	1	0	1	1	up	0	0	0	0	0	0	0	0	0	0	0	0
LCE4A	1	0	1	1	up	0	0	0	0	0	0	0	0	0	0	0	0
C1orf68	1	0	1	1	up	0	0	0	0	0	0	0	0	0	0	0	0
KPRP	1	0	1	1	up	0	0	0	0	0	0	0	0	0	0	0	0
LCE1F	1	0	1	1	up	0	0	0	0	0	0	0	0	0	0	0	0
LCE1E	1	0	1	1	up	0	0	0	0	0	0	0	0	0	0	0	0
LCE1D	1	0	1	1	up	0	0	0	0	0	0	0	0	0	0	0	0
LCE1C	1	0	1	1	up	0	0	0	0	0	0	0	0	0	0	0	0
LCE1B	1	0	1	1	up	0	0	0	0	0	0	0	0	0	0	0	0
LCE1A	1	0	1	1	up	0	0	0	0	0	0	0	0	0	0	0	0
LCE6A	1	0	1	1	up	0	0	0	0	0	0	0	0	0	0	0	0
SMCP	1	0	1	1	up	0	0	0	0	0	0	0	0	0	0	0	0
IVL	1	0	1	1	up	0	0	0	0	0	0	0	0	0	0	0	0
SPRR4	1	0	1	1	up	0	0	0	0	0	0	0	0	0	0	0	0
SPRR1A	1	0	1	1	up	0	0	0	0	0	0	0	0	0	0	0	0
SPRR3	1	0	1	1	up	0	0	0	0	0	0	0	0	0	0	0	0
SPRR1B	1	0	1	1	up	0	0	0	0	0	0	0	0	0	0	0	0
SPRR2D	1	0	1	1	up	0	0	0	0	0	0	0	0	0	0	0	0
SPRR2A	1	0	1	1	up	0	0	0	0	0	0	0	0	0	0	0	0
SPRR2B	1	0	1	1	up	0	0	0	0	0	0	0	0	0	0	0	0
SPRR2E	1	0	1	1	up	0	0	0	0	0	0	0	0	0	0	0	0
SPRR2F	1	0	1	1	up	0	0	0	0	0	0	0	0	0	0	0	0
SPRR2C	1	0	1	1	up	0	0	0	0	0	0	0	0	0	0	0	0
SPRR2G	1.39691	0.482236	0.881169	1	up	0.190585	0	0	0.762338	0	0	0	0	0	0	0	0
LOC101928009	1	0	1	1	up	0	0	0	0	0	0	0	0	0	0	0	0
LELP1	1	0	1	1	up	0	0	0	0	0	0	0	0	0	0	0	0
PRR9	1	0	1	1	up	0	0	0	0	0	0	0	0	0	0	0	0
LOR	1.39691	0.482236	0.881169	1	up	0.180875	0	0.7235	0	0	0	0	0	0	0	0	0
PGLYRP3	1	0	1	1	up	0	0	0	0	0	0	0	0	0	0	0	0
PGLYRP4	2.05521	1.03929	0.334568	1	up	3.06503	1.3948	1.447	2.28701	3.67358	4.85254	0	2.06245	0	3.34929	2.95706	0
S100A9	1.04635	0.0653692	0.748851	0.999062	up	232510	222210	211348	179371	236521	302800	224228	161322	218481	218143	286856	224228
S100A12	-1.05596	-0.0785597	0.831014	0.999062	down	9301.85	9822.34	8374.51	5104.62	7884.72	15843.6	11574.2	5050.26	7191.08	7879.77	15664.6	11574.2
S100A8	1.07831	0.108776	0.680048	0.999062	up	87303.4	80963	78265.3	72693.5	65798.7	132456	84557.5	62029.6	82693.9	57716.1	114223	84557.5
S100A7A	-1.64717	-0.719993	0.823388	1	down	0	0.114581	0	0	0	0	0	0.687484	0	0	0	0
S100A7L2	1.39691	0.482236	0.881169	1	up	0.180875	0	0.7235	0	0	0	0	0	0	0	0	0
S100A7	-1.20843	-0.273138	0.886594	1	down	0.614087	0.795216	0.7235	0.762338	0	0.970509	0	0	1.42201	3.34929	0	0
S100A6	-1.0181	-0.0258805	0.881272	0.999062	down	7090.67	7220.01	8363.66	6248.12	7250.42	6500.47	8011.74	5463.44	8478	7163.02	6192.09	8011.74
S100A5	-2.22853	-1.15609	0.0928919	1	down	2.33102	5.28223	3.6175	2.28701	2.44905	0.970509	5.77381	5.49987	4.26602	4.46572	5.91413	5.77381
S100A4	1.22723	0.295402	0.130479	0.974318	up	6347.28	5171.94	8156.02	5723.64	5605.88	5903.6	5683.74	5403.62	3451.21	5060.78	5748.53	5683.74
LOC101928034	1.48631	0.571733	0.146954	0.999062	up	28.4038	19.0134	42.6865	29.7312	20.8169	20.3807	13.8572	32.9992	18.4861	20.0958	14.7853	13.8572
S100A3	4.2738	2.09552	0.195564	1	up	1.59963	0.401282	2.1705	2.28701	0	1.94102	0	0	1.42201	0	0.985688	0
S100A2	1.00677	0.00973396	0.993361	1	up	1.41876	1.5087	1.447	2.28701	0	1.94102	1.15476	0	1.42201	3.34929	1.97138	1.15476
S100A16	1	0	1	1	up	0	0	0	0	0	0	0	0	0	0	0	0
S100A14	2.21856	1.14962	0.720593	1	up	0.381169	0	0	1.52468	0	0	0	0	0	0	0	0
S100A13	-1.09684	-0.133347	0.735754	0.999062	down	14.6653	16.0575	13.7465	12.9598	18.3679	13.5871	11.5476	17.8746	28.4401	11.1643	15.771	11.5476
S100A1	1.00765	0.0109917	0.986416	1	up	4.19445	4.21173	5.0645	6.09871	3.67358	1.94102	3.46429	4.81239	4.26602	3.34929	5.91413	3.46429
CHTOP	1.10637	0.145839	0.441094	0.999062	up	1365.79	1234.37	1267.57	1331.81	1702.09	1161.7	1120.12	1078.66	1339.53	1672.41	1075.39	1120.12
SNAPIN	4.73974	2.24481	4.3997e-29	6.96824e-26	up	467.238	98.2323	399.372	469.6	637.978	362	95.8453	107.935	92.4304	102.712	94.626	95.8453
ILF2	1.24579	0.317056	0.406841	0.999062	up	467.896	375.555	476.787	654.849	488.586	251.362	526.572	461.302	214.723	368.422	155.739	526.572
NPR1	-2.33711	-1.22472	0.704027	1	down	0	0.384921	0	0	0	0	1.15476	0	0	0	0	1.15476
MIR8083	1	0	1	1	up	0	0	0	0	0	0	0	0	0	0	0	0
INTS3	1.14619	0.196842	0.139313	0.99353	up	3224.5	2813.31	3605.2	2879.35	3140.91	3272.56	2478.12	2738.94	2900.89	3022.18	3261.64	2478.12
SLC27A3	1.364	0.447841	0.18837	0.999062	up	330.837	242.559	502.833	326.281	235.109	259.126	318.715	277.744	115.182	152.951	272.05	318.715
LOC343052	3.72993	1.89915	0.515719	1	up	0.739343	0	0	0.762338	1.22453	0.970509	0	0	0	0	0	0
GATAD2B	-1.00158	-0.00228046	0.989395	0.999062	down	5415.16	5424.04	5296.02	5103.09	5112.4	6149.14	4488.56	4997.32	6754.53	5250.57	6564.68	4488.56
DENND4B	1.06156	0.0861822	0.739675	0.999062	up	5335.67	5026.26	5728.67	5228.88	3619.7	6765.42	3537.04	5827.11	5242.93	4805.12	7208.34	3537.04
CRTC2	1.04197	0.0593141	0.789708	0.999062	up	5634.78	5408.04	6534.65	5267.76	5005.86	5730.85	3717.18	5692.37	6525.58	6621.55	6174.35	3717.18
SLC39A1	-1.06659	-0.0930021	0.544862	0.999062	down	1259.69	1344.73	1549.74	1284.54	989.417	1215.08	1220.58	1354.34	1426.27	1472.57	1374.05	1220.58
MIR6737	-2.45712	-1.29697	0.685623	1	down	0.190585	0.657125	0	0.762338	0	0	0	0	0	0	3.94275	0
CREB3L4	1.66506	0.735572	0.168034	0.999062	up	14.6762	8.83004	13.7465	25.9195	12.2453	6.79356	4.61905	12.3747	9.95404	14.5136	6.89981	4.61905
JTB	1.13631	0.184362	0.144809	0.999062	up	1881.62	1655.86	2172.67	1843.33	1713.11	1797.38	1649	1729.02	1392.14	1709.26	1806.77	1649
RAB13	-1.27442	-0.349836	0.359459	0.999062	down	45.3719	57.9679	36.8985	46.5026	33.0622	65.0241	93.5358	45.3739	39.8162	39.0751	36.4704	93.5358
RPS27	1.19124	0.252463	0.529475	0.999062	up	4478.33	3759.01	4008.19	6338.84	5549.55	2016.72	3131.72	6308.35	1868.52	5711.66	2402.12	3131.72
NUP210L	-1.76922	-0.823117	0.119602	0.953321	down	6.57831	11.4423	6.5115	2.28701	4.8981	12.6166	13.8572	13.7497	8.53203	7.81501	10.8426	13.8572
MIR5698	1	0	1	1	up	0	0	0	0	0	0	0	0	0	0	0	0
TPM3	-1.06951	-0.0969468	0.538905	0.999062	down	29947.6	32029.6	34346.7	24642.6	27704.9	33096.3	34488.1	26328.6	29429.8	30504.2	36938.7	34488.1
MIR190B	1	0	1	1	up	0	0	0	0	0	0	0	0	0	0	0	0
C1orf189	-1.32973	-0.41113	0.269629	0.999062	down	27.1652	35.9151	25.3225	15.2468	42.8584	25.2332	42.7262	19.937	39.8162	44.6572	25.6279	42.7262
C1orf43	-1.2458	-0.317072	0.139355	0.99353	down	2528.67	3150.16	2682.01	2205.44	3242.55	1984.69	3067.05	2577.38	3472.54	4271.46	2445.49	3067.05
UBAP2L	-1.12364	-0.168179	0.314114	0.999062	down	4551.38	5114.55	5023.26	4002.28	4977.7	4202.3	4500.11	4566.27	6373.43	6072.27	4675.12	4500.11
HAX1	-1.13245	-0.179442	0.420487	0.999062	down	800.902	906.615	954.297	683.055	897.578	668.681	837.203	818.793	621.416	1126.48	1198.6	837.203
AQP10	1.0785	0.109026	1	1	up	7.65027	7.04284	0.7235	0.762338	0	29.1153	1.15476	1.37497	0	1.11643	37.4561	1.15476
ATP8B2	1.05249	0.0738026	0.805199	0.999062	up	587.421	558.195	733.629	702.876	514.301	398.879	719.417	684.734	331.327	549.284	344.991	719.417
IL6R	-1.01228	-0.0176022	0.916544	0.999062	down	37802.9	38267.5	38754.3	33642	33452.8	45362.5	33687.9	34343.3	46542.2	36129.9	45213.5	33687.9
SHE	-1.03582	-0.050774	0.829921	0.999062	down	122.061	126.23	109.972	86.9066	127.351	164.016	102.774	111.372	149.311	146.252	144.896	102.774
TDRD10	-1.75149	-0.808587	0.326921	1	down	2.39635	4.39776	4.341	3.04935	1.22453	0.970509	2.30953	2.06245	4.26602	5.58215	9.85688	2.30953
UBE2Q1	-1.07015	-0.0978081	0.476277	0.999062	down	1771.03	1895.2	1743.64	1596.34	1973.94	1770.21	1861.48	1579.15	1921.13	2290.92	1857.04	1861.48
UBE2Q1-AS1	-1.67001	-0.739854	0.18902	0.999062	down	7.20379	11.8624	5.0645	7.62338	12.2453	3.88203	8.08334	10.3123	14.2201	24.5615	5.91413	8.08334
CHRNB2	1.44681	0.532877	0.338478	0.999062	up	71.0637	49.2805	43.41	47.265	100.411	93.1688	18.4762	37.8116	136.513	55.8215	28.5849	18.4762
ADAR	1.32621	0.407306	0.00295719	0.0973721	up	48029	36215	49863.6	47219.2	53208.1	41825	31195.9	36550.1	38030.1	40412.6	39905.6	31195.9
KCNN3	1.01774	0.0253641	0.92093	0.999062	up	250.327	246.221	235.861	196.683	187.353	381.41	219.405	237.869	339.859	197.608	263.179	219.405
PMVK	1.40612	0.491724	0.0805161	0.828599	up	38.3763	27.3989	34.728	49.552	34.2867	34.9383	31.1786	27.4994	21.3301	33.4929	19.7138	31.1786
PBXIP1	1.09783	0.134657	0.643404	0.999062	up	16758.3	15264.6	13074.4	13081	20688.4	20189.5	9885.92	12647.6	16975.9	20905.2	21286.9	9885.92
PYGO2	1.16975	0.226194	0.354629	0.999062	up	580.329	495.615	662.003	615.969	500.831	542.514	379.917	685.422	345.547	539.236	643.654	379.917
SHC1	-1.0341	-0.0483735	0.744011	0.999062	down	2768.55	2862.76	3022.78	2457.78	2959.68	2633.96	2418.07	2792.56	3030.29	3258.86	3258.68	2418.07
CKS1B	-1.08153	-0.113072	0.747985	0.999062	down	22.0381	23.9561	21.705	28.9689	12.2453	25.2332	18.4762	34.3742	27.0181	25.6779	19.7138	18.4762
MIR4258	-1.64717	-0.719993	0.823388	1	down	0	0.164281	0	0	0	0	0	0	0	0	0.985688	0
FLAD1	1.07437	0.103495	0.682792	0.999062	up	136.805	126.992	151.935	155.517	135.922	103.844	136.262	156.059	65.4122	141.787	126.168	136.262
LENEP	1.22303	0.290456	0.895294	1	up	0.552335	0.466162	1.447	0.762338	0	0	0	1.37497	1.42201	0	0	0
ZBTB7B	-1.19191	-0.253278	0.188233	0.999062	down	10834.7	12914.6	13981.6	9095.46	9442.32	10819.2	10672.3	13947	15647.7	14911	11637	10672.3
DCST2	1.10295	0.141368	0.633923	0.999062	up	54.2968	49.1854	50.645	35.8299	45.3075	85.4048	41.5715	43.999	56.8802	48.0065	63.084	41.5715
DCST1	-1.25115	-0.323253	0.601377	0.999062	down	15.7701	19.9054	30.387	6.86104	12.2453	13.5871	6.92858	10.9997	29.8621	22.3286	42.3846	6.92858
LOC100505666	-1.43285	-0.51889	0.395113	0.999062	down	5.85575	8.51305	8.682	3.04935	4.8981	6.79356	12.7024	2.74994	4.26602	7.81501	10.8426	12.7024
ADAM15	1.18149	0.240605	0.409397	0.999062	up	202.228	171.242	302.423	198.97	116.33	191.19	169.75	218.62	120.87	130.622	217.837	169.75
EFNA4	-1.09374	-0.129265	0.557765	0.999062	down	116.38	127.438	137.465	123.499	106.534	98.0214	110.857	158.121	129.402	160.766	94.626	110.857
EFNA3	-1.07476	-0.104019	0.823828	0.999062	down	11.1238	11.6987	8.682	6.09871	12.2453	17.4692	9.2381	12.3747	12.798	7.81501	18.7281	9.2381
EFNA1	2.54802	1.34937	0.0858881	0.856489	up	21.1244	8.15443	7.235	19.0585	23.266	34.9383	2.30953	5.49987	1.42201	7.81501	29.5706	2.30953
SLC50A1	1.16516	0.220526	0.0840063	0.846603	up	315.352	270.253	327.022	299.599	295.111	339.678	255.203	292.181	261.649	255.663	301.62	255.203
DPM3	-1.16288	-0.217707	0.433591	0.999062	down	52.102	60.699	60.774	56.413	51.4301	39.7909	76.2143	58.4361	35.5501	71.4516	46.3273	76.2143
KRTCAP2	1.13768	0.186095	0.455654	0.999062	up	273.138	240.175	367.538	326.281	219.19	179.544	239.036	318.305	186.283	244.498	213.894	239.036
TRIM46	1.17364	0.230993	0.367051	0.999062	up	57.1718	48.8431	52.8155	60.9871	39.1848	75.6997	39.2619	54.9987	58.3022	48.0065	53.2271	39.2619
MUC1	1.54664	0.62914	0.199483	0.999062	up	28.6876	18.558	28.94	25.1572	25.7151	34.9383	5.77381	18.5621	29.8621	17.8629	33.5134	5.77381
MIR92B	2.56466	1.35877	0.671438	1	up	0.485254	0	0	0	0	1.94102	0	0	0	0	0	0
THBS3	1.08868	0.122576	0.642763	0.999062	up	713.056	655.359	877.606	504.668	508.178	961.774	565.834	532.8	803.433	568.263	895.99	565.834
MTX1	-1.12113	-0.164949	0.465255	0.999062	down	1613.12	1808.59	1645.24	1338.67	1351.88	2116.68	1412.27	1613.52	2014.98	1880.07	2518.43	1412.27
GBAP1	1.04783	0.0674107	0.689942	0.999062	up	612.304	584.701	800.191	525.251	565.731	558.043	533.5	566.487	556.004	655.345	663.368	533.5
GBA	1.07461	0.103819	0.552676	0.999062	up	1960.88	1825.18	2639.33	1682.48	1640.87	1880.85	1668.63	1850.02	1713.52	2096.66	1953.63	1668.63
FAM189B	1.17069	0.227359	0.238989	0.999062	up	194.326	165.597	235.138	170.764	176.332	195.072	139.726	202.12	145.045	170.814	196.152	139.726
SCAMP3	1.57238	0.652951	0.0390486	0.565829	up	174.03	110.363	168.576	243.948	178.781	104.815	123.56	157.434	56.8802	114.992	85.7548	123.56
CLK2	-1.00493	-0.00709731	0.964826	0.999062	down	617.06	619.474	612.081	653.324	666.142	536.691	667.453	691.609	472.106	681.023	537.2	667.453
HCN3	1.02715	0.0386443	0.968156	0.999062	up	6.84853	6.70252	10.8525	11.4351	1.22453	3.88203	0	13.7497	8.53203	10.0479	7.8855	0
PKLR	1	0	1	1	up	0	0	0	0	0	0	0	0	0	0	0	0
FDPS	1.04608	0.0649884	0.669192	0.999062	up	437.896	418.557	433.377	449.78	476.341	392.086	485	393.928	362.611	430.942	353.862	485
RUSC1-AS1	2.60669	1.38222	0.174339	1	up	3.13036	1.18866	2.1705	3.04935	2.44905	4.85254	0	1.37497	1.42201	3.34929	0.985688	0
RUSC1	1.2042	0.268071	0.370719	0.999062	up	66.9514	55.535	86.0965	84.6196	56.3282	40.7614	51.9643	81.1231	42.6602	59.1708	46.3273	51.9643
ASH1L	-1.09986	-0.137325	0.391429	0.999062	down	5911.56	6502.22	5544.18	5674.85	6815.71	5611.48	6053.27	5757.68	8728.27	6398.26	6022.55	6053.27
MIR555	2.14172	1.09877	0.708782	1	up	0.562044	0.114581	0.7235	1.52468	0	0	0	0.687484	0	0	0	0
POU5F1P4	1.31584	0.395979	0.381276	0.999062	up	50.0639	38.1193	40.516	66.3234	52.6546	40.7614	16.1667	51.5613	69.6783	52.4722	22.6708	16.1667
ASH1L-AS1	-1.0197	-0.0281437	0.917873	0.999062	down	35.2474	35.6032	26.046	38.8793	39.1848	36.8793	42.7262	40.5616	29.8621	30.1436	27.5993	42.7262
MSTO1	1.17285	0.230014	0.481345	0.999062	up	23.2765	19.9886	31.834	19.0585	25.7151	16.4986	18.4762	19.937	25.5961	16.7465	20.6994	18.4762
MSTO2P	1.02735	0.0389219	0.835028	0.999062	up	89.0737	86.9217	106.355	92.2429	77.1452	80.5522	80.8334	100.373	83.8983	93.7802	81.8121	80.8334
YY1AP1	-1.03607	-0.0511211	0.673639	0.999062	down	4090.27	4238.71	4585.54	3888.69	3941.75	3945.12	3859.22	4203.28	4858.99	4614.21	4037.38	3859.22
DAP3	1.05062	0.0712365	0.556754	0.999062	up	807.629	769.12	837.813	843.146	849.821	699.737	830.274	732.858	746.553	792.666	682.096	830.274
GON4L	-1.02927	-0.041624	0.736704	0.999062	down	3250.65	3345.66	3302.05	2986.84	3676.03	3037.69	3154.81	3104.68	3599.1	3863.97	3196.59	3154.81
SYT11	1.10095	0.138751	0.61053	0.999062	up	411.626	373.491	334.981	342.29	541.241	427.994	245.964	356.117	426.602	541.469	424.831	245.964
RIT1	-1.61107	-0.688023	0.00449394	0.132542	down	4373.08	7045.61	4364.15	3102.72	4576.05	5449.41	6756.52	4582.77	10244.1	6473.06	7460.67	6756.52
KIAA0907	-1.41496	-0.500764	0.0255746	0.446582	down	415.861	588.68	469.552	439.107	466.544	288.241	679.001	587.799	585.866	630.783	369.633	679.001
SNORA80E	-1.95712	-0.968732	0.653188	1	down	0.612263	1.00684	0	0	2.44905	0	2.30953	0	1.42201	0	0	2.30953
SCARNA4	-3.72589	-1.89759	0.0753691	1	down	1.28197	4.9015	2.1705	0.762338	1.22453	0.970509	11.5476	0.687484	1.42201	2.23286	1.97138	11.5476
RXFP4	-1.05653	-0.0793339	0.899396	0.999062	down	22.627	23.8819	9.4055	9.14806	14.6943	57.26	12.7024	13.7497	39.8162	18.9793	45.3416	12.7024
ARHGEF2	-1.41023	-0.495928	0.0284341	0.479085	down	5383.33	7592.44	5821.28	4336.18	4049.51	7326.37	6545.2	6652.78	10545.6	7916.61	7349.29	6545.2
MIR6738	-14.0727	-3.81483	0.00616933	1	down	0.180875	3.91286	0.7235	0	0	0	4.61905	2.74994	8.53203	0	2.95706	4.61905
SSR2	1.08561	0.118508	0.465652	0.999062	up	3237.34	2981.71	3372.23	2962.45	3306.22	3308.46	2401.91	3002.93	2996.17	3512.29	3575.09	2401.91
UBQLN4	1.07588	0.105518	0.78391	0.999062	up	147.266	136.804	144.7	237.85	134.698	71.8176	163.976	208.995	78.2103	131.739	73.9266	163.976
LAMTOR2	1.16486	0.220157	0.341475	0.999062	up	191.169	163.335	176.534	162.378	255.926	169.839	155.893	167.746	109.494	224.403	166.581	155.893
RAB25	1.42843	0.51443	0.633348	1	up	3.40306	2.33329	5.0645	6.09871	2.44905	0	1.15476	6.87484	2.84401	0	1.97138	1.15476
MEX3A	-2.27215	-1.18406	0.713453	1	down	0	0.351582	0	0	0	0	0	0.687484	1.42201	0	0	0
LMNA	-1.02707	-0.038541	0.897769	0.999062	down	123.629	126.352	89.714	159.329	149.392	96.0804	122.405	169.121	62.5682	157.417	124.197	122.405
SEMA4A	1.18539	0.245367	0.356763	0.999062	up	10120.8	8538.04	11636.1	9861.61	6197.33	12788.4	7263.46	9405.47	8448.13	6063.33	12784.4	7263.46
SLC25A44	1.31235	0.392149	0.0331374	0.519634	up	6699.75	5104.97	6154.09	6197.05	6951.64	7496.21	4277.24	4540.14	5507.43	4902.25	7125.54	4277.24
PMF1	1.24086	0.311337	0.166996	0.999062	up	473.444	381.652	595.441	429.196	344.092	525.045	317.56	401.491	368.299	343.861	541.143	317.56
PMF1-BGLAP	1	0	1	1	up	0	0	0	0	0	0	0	0	0	0	0	0
BGLAP	1.88864	0.917346	0.0853712	0.854144	up	14.6204	7.58272	16.6405	14.4844	19.5924	7.76407	6.92858	14.4372	8.53203	6.69858	1.97138	6.92858
PAQR6	-1.11466	-0.156608	0.804409	0.999062	down	260.533	290.506	149.765	449.017	242.456	200.895	53.1191	457.177	716.691	241.149	221.78	53.1191
SMG5	-1.05951	-0.0833934	0.794753	0.999062	down	3012.59	3192.06	2580	4477.21	2858.04	2135.12	2159.41	4444.58	4981.28	3115.96	2291.72	2159.41
TMEM79	1.1706	0.227247	0.530445	0.999062	up	116.961	99.7622	109.249	146.369	96.7376	115.491	50.8096	171.184	127.98	114.992	82.7978	50.8096
GLMP	-1.09614	-0.132426	0.863498	0.999062	down	133.376	146.245	59.327	326.281	118.779	29.1153	34.6429	322.43	314.263	142.903	28.5849	34.6429
VHLL	1.28415	0.360818	0.85025	1	up	0.667882	0.537653	1.447	0	1.22453	0	0	0.687484	1.42201	1.11643	0	0
CCT3	1.05325	0.0748546	0.830642	0.999062	up	293.692	278.606	279.995	400.99	317.152	176.633	321.024	433.802	180.595	288.039	127.154	321.024
TSACC	1.64815	0.72085	0.396162	1	up	5.68285	3.32187	4.341	8.38572	6.12263	3.88203	0	7.56232	2.84401	5.58215	3.94275	0
RHBG	1.1492	0.200627	0.418443	0.999062	up	183.252	159.813	171.47	168.477	131.024	262.037	136.262	146.434	214.723	133.972	191.223	136.262
C1orf61	1.26725	0.341698	0.759304	1	up	1.96927	1.46091	2.1705	2.28701	2.44905	0.970509	0	4.1249	1.42201	2.23286	0.985688	0
MIR9-1	-1.64717	-0.719993	0.823388	1	down	0	0.237001	0	0	0	0	0	0	1.42201	0	0	0
MEF2D	-1.38549	-0.470399	0.0334418	0.522974	down	14478.2	20059.5	16199.9	11769	15654.3	14289.8	14814.5	18372.3	23057.8	28226.7	21071	14814.5
IQGAP3	-4.31226	-2.10844	0.0749529	1	down	1.30496	6.02606	2.1705	3.04935	0	0	12.7024	5.49987	4.26602	0	0.985688	12.7024
TTC24	1.2667	0.341077	0.757488	1	up	4.80679	3.66937	2.894	11.4351	4.8981	0	2.30953	13.0622	0	3.34929	0.985688	2.30953
APOA1BP	1.06867	0.0958176	0.845605	0.999062	up	39.468	36.9	39.7925	67.0858	30.6132	20.3807	48.5	57.0612	11.376	40.1915	15.771	48.5
GPATCH4	1.35735	0.440798	0.513703	0.999062	up	43.2797	31.6936	28.2165	67.8481	67.3489	9.70509	34.6429	64.6235	14.2201	39.0751	2.95706	34.6429
HAPLN2	1.18885	0.24957	0.916205	1	up	0.487007	0.300652	0.7235	0	1.22453	0	0	0.687484	0	1.11643	0	0
BCAN	1.00093	0.001343	0.999668	1	up	0.190585	0.114581	0	0.762338	0	0	0	0.687484	0	0	0	0
NES	-1.64717	-0.719993	0.823388	1	down	0	0.164281	0	0	0	0	0	0	0	0	0.985688	0
CRABP2	-1.0073	-0.0104968	0.981212	0.999062	down	140.174	141.143	104.184	89.1936	128.575	238.745	68.131	90.0604	190.549	161.882	268.107	68.131
ISG20L2	-1.09076	-0.125335	0.438563	0.999062	down	2799.38	3053.34	2823.82	2368.59	2749.06	3256.06	2660.57	2699.06	3138.37	3463.17	3698.3	2660.57
RRNAD1	1.07075	0.0986173	0.633689	0.999062	up	365.036	340.46	390.69	325.518	395.522	348.413	256.357	362.992	311.419	446.572	409.06	256.357
MRPL24	1.04233	0.0598096	0.89602	0.999062	up	34.2211	32.7291	29.6635	64.7988	22.0415	20.3807	24.25	64.6235	22.7521	36.8422	23.6565	24.25
HDGF	-1.11178	-0.15287	0.294265	0.999062	down	2806.41	3120.56	3304.22	2678.86	2516.4	2726.16	3556.67	3176.18	2661.99	2816.75	2955.09	3556.67
PRCC	-1.02045	-0.0292106	0.790831	0.999062	down	1553.66	1585.22	1539.61	1465.21	1498.82	1711.01	1538.14	1485.65	1488.84	1664.6	1795.92	1538.14
SH2D2A	1.18892	0.249646	0.806985	0.999062	up	213.875	179.75	102.737	345.339	396.746	10.6756	84.2977	424.865	46.9262	416.429	21.6851	84.2977
NTRK1	-1.06159	-0.0862233	0.914453	1	down	3.72503	3.8572	4.341	2.28701	2.44905	5.82305	3.46429	4.1249	0	2.23286	9.85688	3.46429
INSRR	-1.27425	-0.349645	0.897282	1	down	0.487007	0.558215	0.7235	0	1.22453	0	0	0	0	3.34929	0	0
PEAR1	1.56243	0.643793	1	1	up	29.4417	18.7927	3.6175	1.52468	4.8981	107.726	6.92858	7.56232	0	5.58215	85.7548	6.92858
LRRC71	-1.08019	-0.111287	0.934435	1	down	1.15671	1.27121	2.894	0.762338	0	0.970509	1.15476	1.37497	0	0	3.94275	1.15476
ARHGEF11	1.21898	0.285674	0.197586	0.999062	up	5115.02	4196.52	6606.28	4534.39	3586.64	5732.79	3683.69	4240.4	4610.14	3369.39	5591.81	3683.69
MIR765	1.12124	0.165093	0.779061	0.999062	up	7.24977	6.63812	9.4055	3.04935	4.8981	11.6461	5.77381	3.43742	11.376	5.58215	7.8855	5.77381
ETV3L	1.48956	0.574882	0.214784	0.999062	up	34.9911	23.1649	22.4285	19.8208	45.3075	52.4075	11.5476	24.7494	18.4861	31.2601	41.3989	11.5476
ETV3	1.12499	0.169913	0.591494	0.999062	up	927.281	823.969	794.403	820.276	739.614	1354.83	584.31	793.357	628.526	837.323	1515.99	584.31
CYCSP52	1.56903	0.649873	0.312775	0.999062	up	11.2412	7.08748	7.235	11.4351	9.79621	16.4986	2.30953	5.49987	7.11003	5.58215	19.7138	2.30953
FCRL5	1.79219	0.84172	0.282415	0.999062	up	15.677	8.60327	14.47	35.8299	3.67358	8.73458	3.46429	28.1868	7.11003	4.46572	4.92844	3.46429
FCRL4	1	0	1	1	up	0	0	0	0	0	0	0	0	0	0	0	0
FCRL3	1.24826	0.319922	0.659367	0.999062	up	43.5223	34.7333	49.198	82.3325	36.7358	5.82305	25.4048	90.0604	11.376	50.2394	5.91413	25.4048
FCRL2	1.00533	0.00767216	0.99073	0.999184	up	11.7567	11.5787	5.788	25.1572	7.34716	8.73458	4.61905	20.6245	4.26602	15.63	19.7138	4.61905
FCRL1	1.137	0.185229	0.382843	0.999062	up	91.5505	80.1855	70.903	89.1936	90.6149	115.491	70.4405	85.248	91.0083	70.3351	93.6403	70.4405
CD5L	1.00093	0.001343	0.999668	1	up	0.180875	0.186072	0.7235	0	0	0	0	0	0	1.11643	0	0
KIRREL	1	0	1	1	up	0	0	0	0	0	0	0	0	0	0	0	0
LOC646268	1	0	1	1	up	0	0	0	0	0	0	0	0	0	0	0	0
CD1D	1.20425	0.268132	0.601979	0.999062	up	159.02	131.732	75.9675	174.575	235.109	150.429	41.5715	196.62	118.026	263.478	129.125	41.5715
CD1A	1.96854	0.977125	0.581566	1	up	1.5846	0.771706	0.7235	0.762338	0	4.85254	0	0.687484	0	0	3.94275	0
CD1C	1.32051	0.401099	0.589474	0.999062	up	14.3347	10.6619	8.682	22.8701	7.34716	18.4397	12.7024	28.1868	0	4.46572	5.91413	12.7024
CD1B	1.12012	0.163653	0.955531	1	up	0.36175	0.300652	1.447	0	0	0	0	0.687484	0	1.11643	0	0
CD1E	2.20789	1.14267	0.286658	1	up	2.82241	1.16026	1.447	2.28701	3.67358	3.88203	0	3.43742	1.42201	1.11643	0.985688	0
OR10T2	1	0	1	1	up	0	0	0	0	0	0	0	0	0	0	0	0
OR10K2	1	0	1	1	up	0	0	0	0	0	0	0	0	0	0	0	0
OR10K1	1	0	1	1	up	0	0	0	0	0	0	0	0	0	0	0	0
OR10R2	-1.64717	-0.719993	0.823388	1	down	0	0.237001	0	0	0	0	0	0	1.42201	0	0	0
OR6Y1	1	0	1	1	up	0	0	0	0	0	0	0	0	0	0	0	0
OR6P1	1	0	1	1	up	0	0	0	0	0	0	0	0	0	0	0	0
OR10X1	1	0	1	1	up	0	0	0	0	0	0	0	0	0	0	0	0
OR10Z1	1	0	1	1	up	0	0	0	0	0	0	0	0	0	0	0	0
SPTA1	1.49125	0.576526	0.446782	1	up	4.48299	3.07943	7.235	5.33637	2.44905	2.91153	4.61905	3.43742	2.84401	0	2.95706	4.61905
OR6K2	1	0	1	1	up	0	0	0	0	0	0	0	0	0	0	0	0
OR6K3	-6.74246	-2.75328	0.0304237	1	down	0.785252	5.67257	2.1705	0	0	0.970509	13.8572	1.37497	2.84401	1.11643	0.985688	13.8572
OR6K6	1	0	1	1	up	0	0	0	0	0	0	0	0	0	0	0	0
OR6N1	2.73809	1.45317	0.423052	1	up	1.03934	0.384921	2.1705	0.762338	1.22453	0	1.15476	0	0	0	0	1.15476
OR6N2	-11.6762	-3.5455	0.0622551	1	down	0	1.93313	0	0	0	0	4.61905	1.37497	0	0	0.985688	4.61905
MNDA	-1.12806	-0.173844	0.449504	0.999062	down	90121.6	101663	85702.9	85237	98346.6	91199.7	139055	72164.5	95554.5	78108.8	86037.7	139055
PYHIN1	1.62373	0.699315	0.351155	0.999062	up	115.842	71.1496	65.8385	207.356	177.556	12.6166	53.1191	163.621	19.9081	127.273	9.85688	53.1191
IFI16	2.26839	1.18167	1.32101e-06	0.000130764	up	22078.5	9733.31	21552.3	20586.2	31825.4	14349.9	10579.9	6328.98	10444.6	9869.25	10597.1	10579.9
AIM2	1.67849	0.747163	0.0201724	0.386793	up	911.266	543.373	874.712	850.77	982.07	937.511	427.262	386.366	1057.97	322.648	638.726	427.262
CADM3	1	0	1	1	up	0	0	0	0	0	0	0	0	0	0	0	0
CADM3-AS1	1	0	1	1	up	0	0	0	0	0	0	0	0	0	0	0	0
ACKR1	1.39691	0.482236	0.881169	1	up	0.306132	0	0	0	1.22453	0	0	0	0	0	0	0
FCER1A	1.03447	0.0488967	0.932531	0.999062	up	112.998	109.281	153.382	89.9559	51.4301	157.222	177.833	78.3732	18.4861	34.6093	168.553	177.833
OR10J3	1	0	1	1	up	0	0	0	0	0	0	0	0	0	0	0	0
OR10J1	1	0	1	1	up	0	0	0	0	0	0	0	0	0	0	0	0
OR10J5	1	0	1	1	up	0	0	0	0	0	0	0	0	0	0	0	0
APCS	1	0	1	1	up	0	0	0	0	0	0	0	0	0	0	0	0
CRP	1	0	1	1	up	0	0	0	0	0	0	0	0	0	0	0	0
DUSP23	1.41263	0.498387	0.0604377	0.716628	up	204.449	144.276	232.967	159.329	175.107	250.391	135.107	166.371	88.1643	125.04	215.866	135.107
FCRL6	1.74707	0.804941	0.465848	0.999062	up	78.1096	44.5723	47.751	150.943	99.1866	14.5576	8.08334	146.434	7.11003	93.7802	3.94275	8.08334
SLAMF8	4.34481	2.11929	2.59043e-06	0.000241336	up	72.8149	17.0158	75.244	103.678	78.3697	33.9678	10.3929	15.1246	38.3941	10.0479	17.7424	10.3929
C1orf204	1.7359	0.795683	0.182288	0.999062	up	21.9158	12.7743	18.811	14.4844	28.1641	26.2037	4.61905	6.18736	32.7061	7.81501	20.6994	4.61905
VSIG8	-1.13063	-0.177124	0.687849	0.999062	down	84.0037	94.9914	78.138	44.978	90.6149	122.284	47.3453	60.4986	163.531	91.5473	159.681	47.3453
CFAP45	-1.02896	-0.0411866	0.910986	0.999062	down	867.186	892.148	615.699	473.412	1089.83	1289.81	636.274	479.176	1170.31	1154.39	1276.47	636.274
MIR4259	-11.1289	-3.47623	0.0259569	1	down	0	1.88942	0	0	0	0	1.15476	0.687484	4.26602	1.11643	2.95706	1.15476
TAGLN2	1.03791	0.0536867	0.842681	0.999062	up	86714.1	83546.4	76695.3	72567	97262.9	100331	52490.9	74933.7	107272	106461	107630	52490.9
IGSF9	1.00634	0.00911446	0.986173	0.999062	up	27.5096	27.1641	19.5345	16.7714	23.266	50.4665	13.8572	20.6245	24.1741	23.445	67.0268	13.8572
SLAMF9	2.08395	1.05932	0.547968	1	up	1.87927	0.917145	0.7235	0	0	6.79356	0	0.687484	2.84401	0	1.97138	0
LINC01133	-1.48346	-0.568962	0.139586	0.99353	down	39.4721	58.2041	24.599	32.0182	62.4508	38.8203	85.4525	30.9368	49.7702	59.1708	38.4418	85.4525
PIGM	1.1157	0.157953	0.372857	0.999062	up	107.466	97.0232	117.931	100.629	101.636	109.667	102.774	88.6854	118.026	87.0816	82.7978	102.774
KCNJ10	1.12658	0.171956	0.765673	0.999062	up	6.97444	6.23312	7.9585	4.57403	8.57168	6.79356	4.61905	6.18736	9.95404	10.0479	1.97138	4.61905
KCNJ9	1	0	1	1	up	0	0	0	0	0	0	0	0	0	0	0	0
IGSF8	1.53566	0.618862	0.225787	0.999062	up	71.6261	46.4316	60.0505	133.409	64.8999	28.1448	38.1072	92.8103	19.9081	66.9858	22.6708	38.1072
ATP1A2	1.14621	0.196869	0.406452	0.999062	up	130.373	114.148	128.783	129.598	89.3904	173.721	107.393	120.31	150.733	83.7323	115.325	107.393
ATP1A4	1.028	0.039844	0.987998	1	up	0.562044	0.558215	0.7235	1.52468	0	0	0	0	0	3.34929	0	0
CASQ1	1.12245	0.166654	0.856489	0.999062	up	6.53342	5.89972	9.4055	4.57403	2.44905	9.70509	0	3.43742	9.95404	11.1643	10.8426	0
LOC729867	1.30941	0.388918	0.401624	0.999062	up	14.6142	10.8615	9.4055	13.7221	15.9188	19.4102	5.77381	17.8746	11.376	14.5136	9.85688	5.77381
PEA15	1.11683	0.159415	0.618588	0.999062	up	161.162	143.793	141.083	222.603	156.739	124.225	112.012	230.307	75.3663	167.465	165.596	112.012
DCAF8	-1.00556	-0.00799736	0.930657	0.999062	down	2243.56	2255.89	2250.09	2326.66	2101.29	2296.22	2149.01	2352.57	2165.71	2268.59	2450.42	2149.01
PEX19	1.12245	0.166657	0.177371	0.999062	up	613.727	546.083	656.938	603.772	624.508	569.689	527.727	576.112	463.574	568.263	613.098	527.727
COPA	-1.31435	-0.394348	0.0627513	0.731818	down	5039.65	6624.98	5745.31	5186.95	4742.59	4483.75	6405.47	5831.93	10218.5	5433.67	5454.8	6405.47
SUMO1P3	-1.09083	-0.12543	0.605151	0.999062	down	232.007	252.894	166.405	186.773	268.171	306.681	220.56	193.183	332.749	263.478	286.835	220.56
NCSTN	-1.08164	-0.113227	0.698967	0.999062	down	6636.49	7178.91	7457.11	5847.13	4809.94	8431.78	5505.91	5624.31	11650.5	5281.83	9504.99	5505.91
NHLH1	-1.05701	-0.0799884	0.869198	0.999062	down	200.306	211.892	319.064	131.885	69.798	280.477	124.714	196.62	243.163	122.807	459.331	124.714
VANGL2	1.93587	0.952983	0.6094	1	up	1.03401	0.537653	0	0	1.22453	2.91153	0	0.687484	1.42201	1.11643	0	0
SLAMF6	1.00189	0.00272225	0.9945	0.999565	up	241.338	240.958	311.105	323.231	164.087	166.927	349.893	330.68	106.65	144.02	164.61	349.893
CD84	-1.02001	-0.0285897	0.928623	0.999062	down	969.648	989.634	1541.06	811.89	626.957	898.691	1427.29	756.92	810.543	679.906	835.863	1427.29
SLAMF1	1.4571	0.543096	0.420084	0.999062	up	55.4076	37.867	44.1335	109.777	55.1037	12.6166	34.6429	84.5605	8.53203	56.938	7.8855	34.6429
CD48	-1.17013	-0.226672	0.451436	0.999062	down	1611.64	1886.1	2079.34	1615.39	1845.36	906.455	2254.1	1836.96	1980.85	2087.73	902.89	2254.1
SLAMF7	1.19052	0.251598	0.278425	0.999062	up	385.742	324.01	324.128	558.032	275.518	385.292	307.167	424.178	304.309	269.06	332.177	307.167
LY9	1.01219	0.0174833	0.978642	0.999062	up	92.1148	90.8252	63.668	189.822	100.411	14.5576	71.5953	213.808	29.8621	129.506	28.5849	71.5953
CD244	-1.57011	-0.650868	0.210405	0.999062	down	129.65	203.69	177.258	121.974	107.758	111.609	389.155	168.434	39.8162	109.41	126.168	389.155
ITLN1	-2.91878	-1.54537	0.154218	1	down	0.794962	2.53684	1.447	0.762338	0	0.970509	3.46429	1.37497	2.84401	1.11643	2.95706	3.46429
LOC101928372	-1.02897	-0.0411986	0.842053	0.999062	down	341.484	351.477	298.082	311.034	293.886	462.933	303.703	315.555	415.226	327.114	443.56	303.703
ITLN2	-1.66287	-0.733676	0.327649	0.999062	down	5.53882	8.97865	4.341	0	11.0207	6.79356	10.3929	4.1249	12.798	3.34929	12.8139	10.3929
F11R	-1.28262	-0.359095	0.0121478	0.274461	down	9470.22	12147.6	10256.3	8455.86	9671.31	9497.4	13168.9	10277.2	14067.9	12020.6	10182.2	13168.9
TSTD1	1.14893	0.200295	0.319037	0.999062	up	323.418	281.328	331.363	346.102	331.847	284.359	219.405	318.993	281.557	387.401	261.207	219.405
USF1	-1.05492	-0.077134	0.645524	0.999062	down	3062.1	3230.01	3108.16	2860.29	3316.02	2963.93	2577.43	3373.48	3569.23	4067.16	3215.31	2577.43
ARHGAP30	-1.17421	-0.231693	0.166089	0.999062	down	21867.5	25677.7	22547.2	19131.6	20639.4	25151.7	22172.6	22603.8	33343.2	26871.4	26902.4	22172.6
PVRL4	-1.17916	-0.237757	0.610011	0.999062	down	15.8795	18.6033	20.9815	9.9104	12.2453	20.3807	12.7024	27.4994	21.3301	7.81501	29.5706	12.7024
KLHDC9	-2.11628	-1.08153	0.69273	1	down	0.190585	0.580743	0	0.762338	0	0	0	2.06245	1.42201	0	0	0
PFDN2	-1.25869	-0.331924	0.361249	0.999062	down	95.0342	119.425	106.355	82.3325	132.249	59.201	176.679	95.5603	55.4582	128.39	83.7835	176.679
NIT1	1.038	0.0538002	0.732632	0.999062	up	454.076	438.36	470.275	474.937	423.686	447.405	384.536	413.865	578.756	413.079	455.388	384.536
DEDD	-1.05953	-0.0834187	0.580742	0.999062	down	1407.46	1492.53	1793.56	1291.4	1142.48	1402.39	1461.93	1394.22	1621.09	1471.46	1544.57	1461.93
UFC1	-1.10599	-0.14534	0.624665	0.999062	down	245.631	271.461	233.691	302.648	312.254	133.93	303.703	322.43	220.411	323.765	154.753	303.703
USP21	1.21157	0.276876	0.114824	0.946688	up	307.928	253.963	348.004	341.528	251.028	291.153	241.345	320.368	217.567	231.101	272.05	241.345
PPOX	1.26832	0.34292	0.34051	0.999062	up	30.7208	24.095	36.175	40.4039	22.0415	24.2627	23.0953	39.1866	15.6421	26.7943	16.7567	23.0953
B4GALT3	1.05242	0.0737135	0.731549	0.999062	up	453.856	431.248	534.667	535.161	417.563	328.032	398.393	559.612	378.253	506.859	345.976	398.393
ADAMTS4	-1.01856	-0.0265281	0.893238	0.999062	down	314.896	321.353	316.893	295.787	241.232	405.673	316.405	285.993	391.051	254.546	363.719	316.405
NDUFS2	1.02707	0.0385316	0.807628	0.999062	up	692.634	674.722	663.45	664.759	590.222	852.107	674.382	616.673	716.691	572.729	793.479	674.382
FCER1G	1.02247	0.0320618	0.943653	0.999062	up	10491.2	10260.9	14621.2	4458.15	7270.01	15615.5	6146.8	4940.95	18400.7	9778.82	16151.5	6146.8
APOA2	-1.4357	-0.521756	0.347187	0.999062	down	50.1428	72.0123	31.1105	18.2961	26.9396	124.225	36.9524	52.2488	129.402	84.8487	91.669	36.9524
TOMM40L	-1.51577	-0.600048	0.114249	0.943912	down	298.642	452.762	306.764	161.616	235.109	491.077	269.06	331.367	669.765	516.907	660.411	269.06
MIR5187	-2.10417	-1.07325	0.324271	1	down	1.88459	4.05232	2.894	0.762338	0	3.88203	9.2381	2.74994	0	1.11643	1.97138	9.2381
NR1I3	-1.45578	-0.541789	0.338014	0.999062	down	35.3674	51.6432	36.175	12.1974	18.3679	74.7292	30.0238	27.4994	100.962	34.6093	86.7405	30.0238
PCP4L1	-1.97375	-0.980939	0.122787	0.959689	down	25.1439	49.6132	13.7465	13.7221	34.2867	38.8203	17.3214	29.5618	156.421	43.5408	33.5134	17.3214
MPZ	-1.25683	-0.329792	0.435916	0.999062	down	335.357	421.513	303.87	176.862	401.645	459.051	236.726	201.433	674.031	701.118	479.044	236.726
SDHC	1.0258	0.0367446	0.868441	0.999062	up	666.518	649.83	663.45	493.233	731.042	778.348	568.143	450.302	769.305	711.166	831.921	568.143
CFAP126	-1.35534	-0.438654	0.348292	0.999062	down	25.533	34.5484	19.5345	19.8208	45.3075	17.4692	32.3334	17.8746	59.7242	50.2394	14.7853	32.3334
FCGR2A	1.17773	0.236012	0.325224	0.999062	up	78232.8	66426.8	73226.9	60594.5	86980.5	92129.4	52317.7	47818	90679.9	70570.7	84856.9	52317.7
HSPA6	1.30649	0.385701	0.0917295	0.878521	up	9570.17	7325.74	12259.7	11778.9	6769.18	7472.92	6902.02	8568.11	9241.61	6084.55	6256.16	6902.02
FCGR3A	1.06996	0.0975586	0.681459	0.999062	up	92100.8	86078.2	70593.3	77151.7	92424.8	128233	76590.8	70025.1	83676.5	81126.5	128460	76590.8
FCGR2C	1.19161	0.252911	0.30305	0.999062	up	21869.5	18353.1	19964.3	17423.2	24003.2	26087.3	14187.4	13211.4	25681.4	19275.2	23575.7	14187.4
HSPA7	1.2269	0.295017	0.116318	0.95	up	4574.44	3729.44	5965.26	5030.67	3385.81	3916	3734.5	3837.54	4339.96	3155.03	3575.09	3734.5
FCGR3B	1.06508	0.0909621	0.703698	0.999062	up	213226	200196	162345	172237	227352	290969	172776	161111	209850	190963	293703	172776
FCGR2B	1.256	0.328842	0.231406	0.999062	up	4000.78	3185.12	3302.78	4304.92	4152.37	4243.06	1874.18	3616.85	3956.02	3523.45	4266.06	1874.18
RPL31P11	1.32336	0.404205	0.403083	0.999062	up	10.921	8.4034	10.8525	10.6727	8.57168	13.5871	6.92858	5.49987	12.798	4.46572	13.7996	6.92858
FCRLA	1.46804	0.553889	0.299151	0.999062	up	11.7389	7.78464	10.129	17.5338	13.4698	5.82305	5.77381	11.6872	2.84401	7.81501	12.8139	5.77381
FCRLB	1.52114	0.60515	0.280199	0.999062	up	18.5377	11.9417	10.129	21.3455	23.266	19.4102	8.08334	11.6872	1.42201	16.7465	25.6279	8.08334
DUSP12	1.00262	0.00377296	0.990619	0.999164	up	55.2416	54.8266	36.8985	68.6104	74.6961	40.7614	72.7501	55.6862	39.8162	52.4722	35.4848	72.7501
ATF6	-1.00895	-0.0128596	0.956985	0.999062	down	5782.04	5833.64	4720.11	4231.74	6241.41	7934.88	5639.86	3928.97	6283.84	5819.95	7689.35	5639.86
OLFML2B	1.10719	0.146907	0.879475	1	up	3.02452	2.74229	1.447	4.57403	1.22453	4.85254	4.61905	2.74994	0	4.46572	0	4.61905
NOS1AP	-1.18924	-0.250038	0.647887	0.999062	down	10.119	12.2613	6.5115	9.14806	7.34716	17.4692	8.08334	6.18736	25.5961	16.7465	8.87119	8.08334
MIR4654	1	0	1	1	up	0	0	0	0	0	0	0	0	0	0	0	0
MIR556	1	0	1	1	up	0	0	0	0	0	0	0	0	0	0	0	0
C1orf111	1.33209	0.413692	0.852398	1	up	0.675839	0.443143	0	0.762338	0	1.94102	0	0.687484	0	0	1.97138	0
C1orf226	-1.32957	-0.410955	0.345061	0.999062	down	18.1513	24.2587	7.9585	20.5831	15.9188	28.1448	25.4048	10.3123	31.2841	24.5615	28.5849	25.4048
SH2D1B	1.45871	0.544692	0.544288	0.999062	up	59.7258	40.805	54.986	122.736	56.3282	4.85254	18.4762	126.497	15.6421	64.753	0.985688	18.4762
UHMK1	-1.06104	-0.0854749	0.535002	0.999062	down	1880.87	1995.17	1619.19	1866.2	1987.41	2050.68	2259.87	1937.33	1906.91	1686.93	1920.12	2259.87
UAP1	-1.21637	-0.282588	0.393927	0.999062	down	634.376	771.397	566.501	645.701	999.213	326.091	974.62	652.422	708.159	906.542	412.018	974.62
DDR2	1.018	0.0257398	0.974169	1	up	2.58336	2.53802	2.894	3.04935	2.44905	1.94102	2.30953	2.74994	1.42201	4.46572	1.97138	2.30953
HSD17B7	1.07289	0.101506	0.539029	0.999062	up	136.034	126.776	122.995	155.517	124.902	140.724	110.857	138.872	136.513	129.506	134.054	110.857
C1orf110	1	0	1	1	up	0	0	0	0	0	0	0	0	0	0	0	0
RGS4	1	0	1	1	up	0	0	0	0	0	0	0	0	0	0	0	0
RGS5	1.46266	0.548594	0.593323	1	up	4.10007	2.82835	4.341	8.38572	3.67358	0	1.15476	4.81239	4.26602	5.58215	0	1.15476
LOC101928404	1	0	1	1	up	0	0	0	0	0	0	0	0	0	0	0	0
NUF2	-1.16976	-0.226213	0.775561	0.999062	down	6.16263	7.00322	2.1705	6.09871	13.4698	2.91153	13.8572	7.56232	1.42201	3.34929	1.97138	13.8572
LOC100422212	1	0	1	1	up	0	0	0	0	0	0	0	0	0	0	0	0
PBX1	1.269	0.343695	0.634661	0.999062	up	15.2301	11.9087	13.023	11.4351	7.34716	29.1153	8.08334	7.56232	2.84401	4.46572	40.4132	8.08334
LOC100505795	1	0	1	1	up	0	0	0	0	0	0	0	0	0	0	0	0
LMX1A	1	0	1	1	up	0	0	0	0	0	0	0	0	0	0	0	0
RXRG	-1.64717	-0.719993	0.823388	1	down	0	0.186072	0	0	0	0	0	0	0	1.11643	0	0
LOC400794	-1.14494	-0.195272	0.918873	1	down	0.571754	0.701935	0	2.28701	0	0	0	0.687484	1.42201	1.11643	0.985688	0
LRRC52	1	0	1	1	up	0	0	0	0	0	0	0	0	0	0	0	0
MGST3	1.3335	0.415214	0.345866	0.999062	up	61.615	45.8837	58.6035	80.8079	57.5527	49.4959	41.5715	70.8109	7.11003	58.0544	56.1842	41.5715
ALDH9A1	-1.0182	-0.0260241	0.887945	0.999062	down	907.188	924.243	991.195	924.716	640.427	1072.41	982.703	954.228	908.661	707.817	1009.34	982.703
LOC440700	1.04464	0.0629992	0.888464	0.999062	up	10.7013	10.2891	13.023	7.62338	8.57168	13.5871	6.92858	12.3747	14.2201	13.3972	7.8855	6.92858
TMCO1	1.02326	0.0331789	0.816144	0.999062	up	814.789	795.453	748.823	837.047	926.966	746.321	875.31	785.794	634.214	836.207	765.879	875.31
LOC100147773	-1.01085	-0.0155661	0.968912	0.999062	down	127.23	128.711	108.525	89.1936	68.5735	242.627	102.774	109.997	177.751	75.9173	203.052	102.774
UCK2	1.1044	0.143258	0.789725	0.999062	up	16.0234	14.3532	16.6405	26.6818	15.9188	4.85254	11.5476	28.8743	8.53203	16.7465	8.87119	11.5476
MIR3658	1	0	1	1	up	0	0	0	0	0	0	0	0	0	0	0	0
FAM78B	1	0	1	1	up	0	0	0	0	0	0	0	0	0	0	0	0
MIR921	1	0	1	1	up	0	0	0	0	0	0	0	0	0	0	0	0
FMO9P	1	0	1	1	up	0	0	0	0	0	0	0	0	0	0	0	0
POGK	-1.06119	-0.085684	0.749257	0.999062	down	307.872	326.943	339.322	409.376	282.866	199.925	403.012	375.366	253.117	318.183	208.966	403.012
TADA1	-1.41887	-0.504738	0.243056	0.999062	down	35.1604	50.0658	35.4515	50.3143	30.6132	24.2627	78.5239	53.6238	28.4401	43.5408	17.7424	78.5239
ILDR2	1.09177	0.126664	0.885061	0.999062	up	5.10853	4.72463	10.129	2.28701	1.22453	6.79356	9.2381	4.81239	0	1.11643	3.94275	9.2381
MAEL	1.00093	0.001343	0.999668	1	up	0.180875	0.186072	0.7235	0	0	0	0	0	0	1.11643	0	0
GPA33	1.45108	0.53713	0.525371	0.999062	up	25.9423	17.7848	26.7695	50.3143	25.7151	0.970509	12.7024	44.6865	9.95404	25.6779	0.985688	12.7024
DUSP27	1	0	1	1	up	0	0	0	0	0	0	0	0	0	0	0	0
LINC01363	-1.16241	-0.217124	0.638559	0.999062	down	10.6131	12.4242	10.129	9.9104	9.79621	12.6166	18.4762	8.93729	11.376	4.46572	12.8139	18.4762
POU2F1	-1.01876	-0.0268139	0.865167	0.999062	down	2503.65	2551.79	3108.16	2233.65	2324.15	2348.63	2655.95	2250.14	3063	2211.65	2474.08	2655.95
CD247	1.15075	0.202575	0.776525	0.999062	up	319.889	277.852	241.649	603.772	399.196	34.9383	248.274	564.424	92.4304	481.182	32.5277	248.274
CREG1	2.43766	1.2855	4.85529e-05	0.00327444	up	8210.96	3368.74	10951.6	9168.64	5109.95	7613.64	4714.9	2844.81	3435.57	1680.23	2822.02	4714.9
RCSD1	1.12938	0.175531	0.421782	0.999062	up	5340.4	4727.86	4725.18	5589.46	5547.1	5499.87	4703.35	5391.94	2615.07	5660.3	5293.14	4703.35
MPZL1	-1.00981	-0.0140909	0.949493	0.999062	down	7075.69	7144.42	4602.91	7096.61	9968.87	6634.4	6668.76	6679.59	7219.52	9215.02	6414.86	6668.76
ADCY10	-1.06536	-0.0913443	0.843977	0.999062	down	31.573	33.4315	11.576	21.3455	47.7565	45.6139	21.9405	26.1244	52.6142	51.3558	26.6136	21.9405
MPC2	-1.01099	-0.0157726	0.945932	0.999062	down	882.596	891.966	707.583	812.653	1250.24	759.908	978.084	666.859	866.001	1159.97	702.795	978.084
DCAF6	-1.07278	-0.101348	0.590414	0.999062	down	1004.83	1077.36	890.629	933.864	1279.63	915.19	1297.95	956.978	897.285	1113.08	900.919	1297.95
MIR1255B2	1	0	1	1	up	0	0	0	0	0	0	0	0	0	0	0	0
GPR161	-1.15504	-0.207937	0.352411	0.999062	down	207.302	240.008	205.474	186.011	159.188	278.536	262.131	191.808	284.401	176.396	263.179	262.131
TIPRL	-1.0781	-0.108496	0.446093	0.999062	down	529.622	571.394	491.98	564.13	564.507	497.871	650.131	501.863	584.444	554.866	486.93	650.131
SFT2D2	1.00167	0.00240724	0.992423	0.9995	up	79.2236	78.5947	59.327	73.1845	102.86	81.5227	66.9762	91.4354	93.8524	97.1295	55.1985	66.9762
ANKRD36BP1	1.00137	0.00197849	0.992845	0.9995	up	179.269	178.967	143.253	192.109	137.147	244.568	168.595	200.745	193.393	138.437	204.037	168.595
TBX19	1.08235	0.114164	0.590881	0.999062	up	89.379	82.5887	99.1195	79.2832	110.207	68.9061	75.0596	81.1231	99.5404	93.7802	70.9695	75.0596
MIR557	1	0	1	1	up	0	0	0	0	0	0	0	0	0	0	0	0
LOC100505918	1	0	1	1	up	0	0	0	0	0	0	0	0	0	0	0	0
LOC101928565	1.05726	0.0803289	0.81988	0.999062	up	48.0452	45.6689	57.1565	38.1169	36.7358	60.1715	27.7143	35.7492	63.9902	46.8901	71.9552	27.7143
XCL2	2.32821	1.21922	0.446623	0.999062	up	8.50892	3.56571	2.894	21.3455	9.79621	0	0	15.8121	0	5.58215	0	0
XCL1	1.63046	0.70528	0.532178	0.999062	up	6.92241	4.09362	5.788	9.9104	11.0207	0.970509	1.15476	14.4372	0	7.81501	0	1.15476
DPT	1	0	1	1	up	0	0	0	0	0	0	0	0	0	0	0	0
LINC00626	1	0	1	1	up	0	0	0	0	0	0	0	0	0	0	0	0
LINC00970	1.06708	0.0936715	0.674901	0.999062	up	256.774	241.04	238.032	260.72	198.373	329.973	209.012	229.62	321.373	186.444	290.778	209.012
ATP1B1	1.44964	0.535696	0.334746	0.999062	up	17.4157	11.7691	18.811	22.1078	12.2453	16.4986	6.92858	22.687	1.42201	17.8629	14.7853	6.92858
NME7	-1.4117	-0.497433	0.15154	0.999062	down	22.3969	31.7163	15.1935	30.4935	24.4905	19.4102	31.1786	28.8743	35.5501	45.7737	17.7424	31.1786
BLZF1	1.01126	0.0161494	0.912936	0.999062	up	527.269	521.333	441.335	607.584	586.548	473.608	561.215	503.238	533.252	514.674	454.402	561.215
CCDC181	-1.01662	-0.0237808	0.952302	0.999062	down	15.6423	15.9674	18.811	21.3455	9.79621	12.6166	18.4762	22.687	9.95404	13.3972	12.8139	18.4762
SLC19A2	-1.43982	-0.525887	0.119082	0.952886	down	413.431	595.698	593.27	429.196	437.156	194.102	803.715	541.737	585.866	524.722	314.434	803.715
F5	1.16103	0.215405	0.438325	0.999062	up	10156.7	8747.85	10108	6524.85	12899.2	11094.9	6328.1	6502.91	9998.12	12184.7	11145.2	6328.1
SELP	1.14166	0.191136	0.439518	0.999062	up	213.811	187.019	248.884	152.468	227.762	226.129	155.893	158.809	150.733	227.752	273.036	155.893
SELL	1.08987	0.12416	0.489747	0.999062	up	109186	100182	106645	93155.5	137992	98953.1	100481	86237.3	85419.9	130951	97524	100481
SELE	2.15362	1.10677	0.730768	1	up	0.36175	0	1.447	0	0	0	0	0	0	0	0	0
METTL18	-1.14939	-0.200863	0.686553	0.999062	down	22.4208	25.8678	22.4285	28.2065	24.4905	14.5576	46.1905	20.6245	14.2201	20.0958	7.8855	46.1905
C1orf112	1.70212	0.767332	0.0160798	0.334653	up	162.171	94.9664	135.295	150.943	282.866	79.5817	100.464	98.3102	89.5863	106.061	74.9123	100.464
SCYL3	2.11822	1.08286	0.00010578	0.00649357	up	962.279	453.799	679.367	818.751	1662.91	688.091	429.572	424.178	386.785	471.134	581.556	429.572
KIFAP3	-1.06273	-0.0877701	0.831531	0.999062	down	99.4057	105.853	127.336	125.786	93.064	51.437	174.369	92.1229	55.4582	82.6159	56.1842	174.369
METTL11B	1.39691	0.482236	0.881169	1	up	0.242627	0	0	0	0	0.970509	0	0	0	0	0	0
MIR3119-2	1	0	1	1	up	0	0	0	0	0	0	0	0	0	0	0	0
MIR3119-1	1	0	1	1	up	0	0	0	0	0	0	0	0	0	0	0	0
LINC01142	1	0	1	1	up	0	0	0	0	0	0	0	0	0	0	0	0
LOC101928650	1	0	1	1	up	0	0	0	0	0	0	0	0	0	0	0	0
GORAB	1.15673	0.210056	0.707325	0.999062	up	17.3679	14.7333	13.7465	25.9195	22.0415	7.76407	13.8572	28.8743	2.84401	20.0958	8.87119	13.8572
PRRX1	1	0	1	1	up	0	0	0	0	0	0	0	0	0	0	0	0
MROH9	1.58967	0.668726	0.835188	1	up	0.381169	0.114581	0	1.52468	0	0	0	0.687484	0	0	0	0
FMO3	-1.64717	-0.719993	0.823388	1	down	0	0.164281	0	0	0	0	0	0	0	0	0.985688	0
MIR1295A	1	0	1	1	up	0	0	0	0	0	0	0	0	0	0	0	0
MIR1295B	1	0	1	1	up	0	0	0	0	0	0	0	0	0	0	0	0
FMO6P	1	0	1	1	up	0	0	0	0	0	0	0	0	0	0	0	0
FMO2	1	0	1	1	up	0	0	0	0	0	0	0	0	0	0	0	0
FMO1	1	0	1	1	up	0	0	0	0	0	0	0	0	0	0	0	0
FMO4	-1.40122	-0.486682	0.452773	0.999062	down	6.90664	9.68025	8.682	9.9104	6.12263	2.91153	15.0119	16.4996	4.26602	3.34929	3.94275	15.0119
TOP1P1	1.35843	0.441945	0.123409	0.959689	up	519.06	382.215	415.289	570.991	791.044	298.917	394.929	277.744	504.812	415.312	305.563	394.929
PRRC2C	-1.09228	-0.127338	0.455977	0.999062	down	25025.1	27334.5	22271.5	24062.4	30158.9	23607.6	26168.1	22588	35555.8	29361	24166.1	26168.1
MYOC	-3.56868	-1.83539	0.567867	1	down	0	0.557724	0	0	0	0	0	1.37497	0	0	1.97138	0
VAMP4	-1.11258	-0.153912	0.512151	0.999062	down	167.522	186.146	156.276	166.952	198.373	148.488	243.655	185.621	152.155	168.581	123.211	243.655
METTL13	1.0106	0.0152133	0.957623	0.999062	up	57.4075	56.7998	64.3915	70.8975	47.7565	46.5844	69.2858	76.3107	41.2382	41.3079	43.3703	69.2858
DNM3	-1.16253	-0.217273	0.777624	0.999062	down	15.1874	17.4244	2.894	9.14806	19.5924	29.1153	18.4762	10.9997	2.84401	4.46572	49.2844	18.4762
DNM3-IT1	1.97885	0.98466	0.75802	1	up	0.612263	0.186072	0	0	2.44905	0	0	0	0	1.11643	0	0
DNM3OS	1.2516	0.323771	0.903574	1	up	0.666129	0.458323	0.7235	0	0	1.94102	0	2.74994	0	0	0	0
MIR214	1	0	1	1	up	0	0	0	0	0	0	0	0	0	0	0	0
MIR3120	1	0	1	1	up	0	0	0	0	0	0	0	0	0	0	0	0
MIR199A2	1	0	1	1	up	0	0	0	0	0	0	0	0	0	0	0	0
C1orf105	1.56466	0.645849	0.780295	1	up	0.729634	0.343742	0.7235	0	1.22453	0.970509	0	2.06245	0	0	0	0
[truncated: 24,483 more rows]
