# Supplementary material for: CXCR3+ LEF1low NK cells cause immunopathological hepatic damage in MASH
Source: Research Square preprint supplement (doi:10.21203/rs.3.rs-8654560/v1), 2026-02-11
Supplement: Supplementary file 5 [file b6d544c45a7eb3d2d0dc1206.xlsx]

## Sheet: Sheet1
Rank	Gene	Z-score						GENE	Y	X
1	IRF1_21803131_ChIP-Seq_MONOCYTES_Human	6.90625	Irf1					Irf1	6.90625	1
2	STAT1_22096565_ChIP-ChIP_GC-B_Human	6.81698	Stat1					Stat1	6.81698	2
3	IRF4_21731497_ChIP-ChIP_J774_Mouse	6.25804	Irf4					Irf4	6.25804	3
4	IRF8_22096565_ChIP-ChIP_GC-B_Mouse	4.18504	Irf8					Batf2	4.18504	4
5	IRF8_27001747_Chip-Seq_BMDM_Mouse	3.97054	Irf8					Irf8	3.97054	5
6	SMRT_22465074_ChIP-Seq_MACROPHAGES_Mouse	3.13802	Smrt					Smrt	3.13802	6
7	GATA1_22025678_ChIP-Seq_K562_Human	3.12966	Gata1					Gata1	3.12966	7
8	BP1_19119308_ChIP-ChIP_Hs578T_Human	3.10105	Bp1					Bp1	3.10105	8
9	NCOR_22465074_ChIP-Seq_MACROPHAGES_Mouse	2.90102	Ncor					Ncor	2.90102	9
10	* ESR1_17901129_ChIP-ChIP_LIVER_Mouse	2.90052	Esr1					Esr1	2.90052	10
11	TP63_17297297_ChIP-ChIP_HaCaT_Human	2.8582	Tp63					Tp63	2.8582	11
12	Nerf2_26677805_Chip-Seq_MACROPHAGESS_Mouse	2.83418	Nerf2					Nerf2	2.83418	12
13	RELA_24523406_ChIP-Seq_FIBROSARCOMA_Human	2.63708	Rela					Rela	2.63708	13
14	SMAD_19615063_ChIP-ChIP_OVARY_Human	2.48719	Smad					Smad	2.48719	14
15	STAT4_19710469_ChIP-ChIP_TH1__Mouse	2.42175	Stat4					Stat4	2.42175	15
16	STAT3_20064451_ChIP-Seq_CD4+T_Mouse	2.34954	Stat3					Stat3	2.34954	16
17	FOXP3_17237761_ChIP-ChIP_TREG_Mouse	2.34573	Foxp3					Foxp3	2.34573	17
18	STAT5_23275557_ChIP-Seq_MAMMARY-EPITHELIUM_Mouse	2.34248	Stat5					Stat5	2.34248	18
19	* EGR1_23403033_ChIP-Seq_LIVER_Mouse	2.3163	Egr1					Egr1	2.3163	19
20	* RXR_22158963_ChIP-Seq_LIVER_Mouse	2.24414	Rxr					Rxr	2.24414	20
21	LXR_22158963_ChIP-Seq_LIVER_Mouse	2.18121	Lxr					Lxr	2.18121	21
22	PPARA_22158963_ChIP-Seq_LIVER_Mouse	2.05512	Ppara					Ppara	2.05512	22
23	STAT3_22323479_ChIP-Seq_MACROPHAGE_Mouse	2.00711	Stat3					Stat3	2.00711	23
24	STAT6_20620947_ChIP-Seq_CD4_POS_T_Human	1.90134	Stat6					Stat6	1.90134	24
25	NR1H3_23393188_ChIP-Seq_ATHEROSCLEROTIC-FOAM_Human	1.89656	Nr1H3					Nr1H3	1.89656	25
26	NUCKS1_24931609_ChIP-Seq_HEPATOCYTES_Mouse	1.84597	Nucks1					Nucks1	1.84597	26
27	MYB_21317192_ChIP-Seq_ERMYB_Mouse	1.84488	Myb					Myb	1.84488	27
28	PPARG_19300518_ChIP-PET_3T3-L1_Mouse	1.77728	Pparg					Pparg	1.77728	28
29	MECOM_23826213_ChIP-Seq_KASUMI_Mouse	1.74171	Mecom					Mecom	1.74171	29
30	TRIM28_21343339_ChIP-Seq_HEK293_Human	1.71287	Trim28					Trim28	1.71287	30
31	THRA_23701648_ChIP-Seq_CEREBELLUM_Mouse	1.63637	Thra					Thra	1.63637	31
32	VDR_23401126_ChIP-Seq_LCL-AND-THP1_Human	1.60146	Vdr					Vdr	1.60146	32
33	FOXO1_23066095_ChIP-Seq_LIVER_Mouse	1.59443	Foxo1					Foxo1	1.59443	33
34	CIITA_18437201_ChIP-ChIP_Raji_B_and_iDC_Human	1.57571	Ciita					Ciita	1.57571	34
35	GATA2_21666600_ChIP-Seq_HMVEC_Human	1.40218	Gata2					Gata2	1.40218	35
36	VDR_24787735_ChIP-Seq_THP-1_Human	1.37352	Vdr					Vdr	1.37352	36
37	BRD4_27068464_Chip-Seq_AML-cells_Mouse	1.34344	Brd4					Brd4	1.34344	37
38	CEBPB_20176806_ChIP-Seq_THIOMACROPHAGE_Mouse	1.33997	Cebpb					Cebpb	1.33997	38
39	* EGR1_19032775_ChIP-ChIP_M12_Human	1.33676	Egr1					Egr1	1.33676	39
40	PPARG_20176806_ChIP-Seq_THIOMACROPHAGE_Mouse	1.32995	Pparg					Pparg	1.32995	40
41	SPI1_22096565_ChIP-ChIP_GC-B_Mouse	1.29888	Spi1					Spi1	1.29888	41
42	RUNX1_20887958_ChIP-Seq_HPC-7_Mouse	1.26599	Runx1					Runx1	1.26599	42
43	EGR1_19374776_ChIP-ChIP_THP-1_Human	1.24704	Egr1					Egr1	1.24704	43
44	PPARG_20176806_ChIP-Seq_MACROPHAGES_Mouse	1.24189	Pparg					Pparg	1.24189	44
45	SCL_19346495_ChIP-Seq_HPC-7_Human	1.22473	Scl					Scl	1.22473	45
46	PU_27001747_Chip-Seq_BMDM_Mouse	1.22258	Pu					Pu	1.22258	46
47	MAF_26560356_Chip-Seq_TH1_Human	1.11429	Maf					Maf	1.11429	47
48	NFE2L2_22581777_ChIP-Seq_LYMPHOBLASTOID_Human	1.10121	Nfe2L2					Nfe2L2	1.10121	48
49	SOX2_20726797_ChIP-Seq_SW620_Human	1.09924	Sox2					Sox2	1.09924	49
50	CEBPA_23403033_ChIP-Seq_LIVER_Mouse	1.09096	Cebpa					Cebpa	1.09096	50
51	STAT1_20625510_ChIP-Seq_HELA_Human	1.0736	Stat1					Stat1	1.0736	51
52	* CEBPB_21427703_ChIP-Seq_3T3-L1_Mouse	1.05797	Cebpb					Cebpb	1.05797	52
53	RUNX_20019798_ChIP-Seq_JUKART_Human	1.04914	Runx					Runx	1.04914	53
54	MYB_26560356_Chip-Seq_TH2_Human	1.04377	Myb					Myb	1.04377	54
55	TCF21_26020271_ChIP-Seq_SMOOTH_MUSCLE_Human	1.04154	Tcf21					Tcf21	1.04154	55
56	LYL1_20887958_ChIP-Seq_HPC-7_Mouse	1.03796	Lyl1					Lyl1	1.03796	56
57	BACH1_22875853_ChIP-PCR_HELA_AND_SCP4_Human	1.02644	Bach1					Bach1	1.02644	57
58	LMO2_20887958_ChIP-Seq_HPC-7_Mouse	1.0082	Lmo2					Lmo2	1.0082	58
59	CEBPB_20176806_ChIP-Seq_MACROPHAGES_Mouse	1.00224	Cebpb					Cebpb	1.00224	59
60	FOXO3_23340844_ChIP-Seq_DLD1_Human	0.985258	Foxo3					Foxo3	0.985258	60
61	SPI1_23127762_ChIP-Seq_K562_Human	0.980258	Spi1					Spi1	0.980258	61
62	NFE2L2_20460467_ChIP-Seq_MEFs_Mouse	0.974613	Nfe2L2					Nfe2L2	0.974613	62
63	NRF2_20460467_ChIP-Seq_MEFs_Mouse	0.974613	Nrf2					Nrf2	0.974613	63
64	CLOCK_20551151_ChIP-Seq_293T_Human	0.951778	Clock					Clock	0.951778	64
65	MEIS1_20887958_ChIP-Seq_HPC-7_Mouse	0.944971	Meis1					Meis1	0.944971	65
66	NR1I2_20693526_ChIP-Seq_LIVER_Mouse	0.93498	Nr1I2					Nr1I2	0.93498	66
67	VDR_21846776_ChIP-Seq_THP-1_Human	0.913137	Vdr					Vdr	0.913137	67
68	FOXO1_25302145_ChIP-Seq_T-LYMPHOCYTE_Mouse	0.902635	Foxo1					Foxo1	0.902635	68
69	LXR_22292898_ChIP-Seq_THP-1_Human	0.871377	Lxr					Lxr	0.871377	69
70	VDR_24763502_ChIP-Seq_THP-1_Human	0.842928	Vdr					Vdr	0.842928	70
71	GATA3_26560356_Chip-Seq_TH2_Human	0.824099	Gata3					Gata3	0.824099	71
72	TRP63_18441228_ChIP-ChIP_KERATINOCYTES_Mouse	0.809287	Trp63					Trp63	0.809287	72
73	GATA1_19941826_ChIP-Seq_K562_Human	0.792019	Gata1					Gata1	0.792019	73
74	BMI1_19503595_ChIP-Seq_MEFsC_Mouse	0.789458	Bmi1					Bmi1	0.789458	74
75	ESR1_21235772_ChIP-Seq_MCF-7_Human	0.766088	Esr1					Esr1	0.766088	75
76	RUNX1_22412390_ChIP-Seq_EML_Mouse	0.765814	Runx1					Runx1	0.765814	76
77	GATA2_20887958_ChIP-Seq_HPC-7_Mouse	0.765721	Gata2					Gata2	0.765721	77
78	CEBPA_20513432_ChIP-Seq_MACROPHAGES_Mouse	0.764593	Cebpa					Cebpa	0.764593	78
79	VDR_20736230_ChIP-Seq_LYMPHOBLASTOID_Human	0.76407	Vdr					Vdr	0.76407	79
80	SPI1_23547873_ChIP-Seq_NB4_Human	0.76297	Spi1					Spi1	0.76297	80
81	PU.1_20176806_ChIP-Seq_MACROPHAGES_Mouse	0.753126	Pu.1					Pu.1	0.753126	81
82	CEBPD_21427703_ChIP-Seq_3T3-L1_Mouse	0.74869	Cebpd					Cebpd	0.74869	82
83	SOX9_22984422_ChIP-ChIP_TESTIS_Rat	0.740375	Sox9					Sox9	0.740375	83
84	SOX2_27498859_Chip-Seq_STOMACH_Mouse	0.737636	Sox2					Sox2	0.737636	84
85	CDX2_19796622_ChIP-Seq_MESCs_Mouse	0.735761	Cdx2					Cdx2	0.735761	85
86	GATA3_27048872_Chip-Seq_THYMUS_Human	0.727221	Gata3					Gata3	0.727221	86
87	IKZF1_21737484_ChIP-ChIP_HCT116_Human	0.722068	Ikzf1					Ikzf1	0.722068	87
88	MYB_26560356_Chip-Seq_TH1_Human	0.710123	Myb					Myb	0.710123	88
89	TFEB_21752829_ChIP-Seq_HELA_Human	0.704962	Tfeb					Tfeb	0.704962	89
90	CJUN_26792858_Chip-Seq_BT549_Human	0.704289	Cjun					Cjun	0.704289	90
91	UTX_26944678_Chip-Seq_JUKART_Human	0.703635	Utx					Utx	0.703635	91
92	FOXA1_26769127_Chip-Seq_PDAC-Cell_line_Human	0.701756	Foxa1					Foxa1	0.701756	92
93	STAT6_21828071_ChIP-Seq_BEAS2B_Human	0.701382	Stat6					Stat6	0.701382	93
94	P63_26484246_Chip-Seq_KERATINOCYTES_Human	0.698912	P63					P63	0.698912	94
95	CEBPB_20513432_ChIP-Seq_MACROPHAGES_Mouse	0.692818	Cebpb					Cebpb	0.692818	95
96	GATA2_26923725_Chip-Seq_HEMANGIOBLAST_Mouse	0.692188	Gata2					Gata2	0.692188	96
97	ELK3_25401928_ChIP-Seq_HUVEC_Human	0.6886	Elk3					Elk3	0.6886	97
98	CDX2_20551321_ChIP-Seq_CACO-2_Human	0.67887	Cdx2					Cdx2	0.67887	98
99	KDM2B_26808549_Chip-Seq_SUP-B15_Human	0.67255	Kdm2B					Kdm2B	0.67255	99
100	ELF3_26769127_Chip-Seq_PDAC-Cell_line_Human	0.671872	Elf3					Elf3	0.671872	100
Showing 1 to 100 of 124 entries
Previous
1
2
Next
