# Supplementary material for: CXCR3+ LEF1low NK cells cause immunopathological hepatic damage in MASH
Source: Research Square preprint supplement (doi:10.21203/rs.3.rs-8654560/v1), 2026-02-11
Supplement: Supplementary file 6 [file ffa1d4d95dac80a6ddf2fe06.xlsx]

## Sheet: NK-ND vs CDHFD
Genes	liver_ND_Cxcr3+_1	liver_ND_Cxcr3+_2	liver_ND_Cxcr3+_3	liver_ND_Cxcr3+_4	liver_ND_Cxcr3+_5	liver_ND_Cxcr3+_6	liver_CDHFD_Cxcr3+_1	liver_CDHFD_Cxcr3+_2	liver_CDHFD_Cxcr3+_3	liver_CDHFD_Cxcr3+_4	liver_CDHFD_Cxcr3+_5	liver_ND_Cxcr3-_1	liver_ND_Cxcr3-_2	liver_ND_Cxcr3-_3	liver_ND_Cxcr3-_4	liver_ND_Cxcr3-_5	liver_ND_Cxcr3-_6	liver_CDHFD_Cxcr3-_1	liver_CDHFD_Cxcr3-_2	liver_CDHFD_Cxcr3-_3	liver_CDHFD_Cxcr3-_4	liver_CDHFD_Cxcr3-_5	liver_CDHFD_Cxcr3-_6
Aaas	1	5	13	10	24	22	7	8	9	14	5	22	7	8	19	15	15	15	7	9	6	4	11
Aacs	0	1	2	2	5	9	3	6	0	3	1	7	3	7	7	5	9	1	6	6	2	0	9
Aadac	0	0	0	0	0	1	0	0	0	0	0	0	0	0	0	0	0	0	0	0	0	0	0
Aaed1	0	9	14	14	26	25	3	9	2	5	1	31	12	14	19	23	10	13	12	8	16	6	17
Aagab	0	9	8	19	17	15	5	9	3	11	0	16	5	6	21	8	20	4	7	8	8	2	7
Aak1	0	6	3	8	11	8	7	8	2	11	1	26	4	8	10	7	12	2	9	6	11	2	8
Aamdc	0	7	18	7	19	23	2	8	3	16	4	18	6	7	11	14	18	9	9	4	6	2	17
Aamp	1	25	40	56	75	57	20	34	26	64	7	70	26	33	50	48	55	54	37	25	34	13	45
Aar2	0	4	9	11	10	10	3	8	5	8	5	12	4	3	16	14	10	4	11	3	8	5	8
Aars	0	6	7	10	12	12	11	17	3	8	2	18	2	9	13	6	13	8	11	5	7	1	13
Aars2	0	1	4	3	2	4	2	2	1	4	0	4	5	1	7	2	6	3	2	2	2	0	3
Aarsd1	0	0	0	0	1	1	0	0	0	0	0	0	0	1	0	0	0	0	0	0	0	0	0
Aasdh	0	1	2	1	0	2	0	1	0	0	0	3	2	0	3	0	2	2	0	0	0	0	0
Aasdhppt	1	10	12	12	24	9	8	8	11	25	3	20	6	6	25	14	26	16	16	4	7	9	18
Aass	0	0	0	0	0	0	0	0	0	0	0	0	0	0	0	0	0	0	0	0	0	0	0
Aatf	0	6	12	8	17	20	6	10	5	13	3	15	2	8	13	8	18	14	7	11	9	3	11
Abca1	0	0	1	1	2	1	0	0	0	0	0	3	0	1	1	1	1	1	0	1	0	0	0
Abca13	0	0	0	0	0	0	0	0	0	0	0	0	0	0	0	0	0	0	0	0	1	0	0
Abca17	0	0	0	0	0	0	0	0	0	0	0	0	0	0	0	0	0	0	0	0	0	0	0
Abca2	0	2	6	11	8	12	5	6	2	3	2	8	3	4	6	2	4	3	5	2	8	3	4
Abca3	0	1	3	4	4	3	0	0	0	2	2	6	2	2	6	1	4	1	4	0	2	0	3
Abca5	0	0	0	0	0	0	0	0	0	0	0	0	1	0	0	0	0	0	0	0	0	0	0
Abca7	1	7	23	17	18	12	8	17	10	14	3	27	2	15	13	9	28	12	9	4	14	3	15
Abca8a	0	0	0	0	0	0	0	0	0	0	0	0	0	0	0	0	0	0	0	0	0	0	0
Abcb10	0	0	2	0	2	0	0	0	3	3	0	0	0	2	2	1	0	0	0	1	0	1	1
Abcb1a	1	11	23	21	21	28	13	29	19	40	4	27	7	12	24	8	35	13	20	4	21	6	18
Abcb1b	0	1	1	2	12	6	1	4	1	4	1	5	2	5	7	4	7	1	4	3	5	0	4
Abcb4	0	0	0	0	0	0	0	0	0	0	0	0	0	0	0	0	0	0	0	0	0	0	0
Abcb6	0	0	0	0	0	0	0	0	0	0	0	2	0	0	0	0	0	0	0	0	0	0	2
Abcb7	0	2	4	0	3	4	5	3	3	3	0	11	1	3	6	5	4	0	1	2	3	1	4
Abcb8	1	3	2	2	5	1	3	4	0	3	1	1	1	2	2	3	9	0	2	1	1	0	4
Abcb9	0	7	21	17	19	25	23	25	20	36	7	18	2	14	16	14	15	18	32	10	5	2	15
Abcc1	0	1	6	2	2	8	3	2	0	3	1	9	1	2	3	2	6	3	2	3	2	1	2
Abcc10	1	2	1	1	3	6	1	1	2	7	1	2	2	1	2	2	5	1	2	1	2	0	3
Abcc3	0	0	0	0	0	0	0	0	0	0	0	0	0	0	0	0	0	0	0	0	0	0	0
Abcc4	0	1	1	3	6	2	1	3	4	1	0	6	1	2	5	1	4	4	1	1	3	0	4
Abcc5	1	5	13	4	11	2	6	6	0	8	2	4	10	3	7	3	10	6	6	4	2	0	5
Abcd1	0	1	9	5	15	10	7	8	7	13	2	17	2	11	9	9	21	7	8	5	4	2	13
Abcd2	0	0	0	0	0	0	0	0	0	0	0	0	0	0	0	0	0	0	1	0	2	0	0
Abcd3	0	0	1	1	4	8	0	3	0	2	1	11	2	4	4	2	7	5	1	0	0	2	4
Abcd4	0	1	5	1	9	7	1	0	0	2	0	4	4	3	2	4	7	2	1	3	5	1	5
Abce1	2	9	8	10	23	14	10	19	4	15	3	24	8	10	19	19	24	21	11	15	10	0	14
Abcf1	2	32	69	46	86	75	38	62	18	47	11	70	36	39	65	49	82	51	48	20	42	14	62
Abcf2	0	12	14	18	13	17	12	13	4	13	1	27	6	11	18	15	18	6	12	7	11	2	15
Abcf3	1	9	16	9	16	19	4	16	8	22	0	27	2	6	21	14	20	14	9	6	11	4	12
Abcg1	1	9	9	9	9	12	6	10	3	7	2	9	6	8	30	8	14	3	9	5	11	2	9
Abcg2	0	2	1	1	0	6	0	1	0	1	0	4	1	3	5	0	3	1	2	0	1	0	1
Abcg3	0	3	13	2	5	6	0	3	2	13	0	10	1	5	5	9	11	2	4	2	0	2	3
Abhd1	0	0	0	0	2	1	1	0	0	1	0	0	2	1	0	0	1	0	0	0	1	1	2
Abhd10	0	6	13	15	15	15	5	8	7	14	1	11	5	8	13	8	16	5	5	3	8	2	10
Abhd11	0	10	16	12	25	22	3	5	3	9	4	24	5	4	19	17	16	8	18	12	14	2	16
Abhd11os	0	0	0	0	1	0	0	0	0	0	0	0	0	0	0	0	0	0	0	0	0	0	0
Abhd12	1	9	22	24	20	20	13	23	10	33	6	25	9	29	20	14	21	13	10	12	7	3	28
Abhd13	0	1	2	0	2	3	2	3	1	1	0	4	0	0	2	0	3	1	0	3	1	0	2
Abhd14a	1	1	8	4	10	8	1	2	1	3	0	10	1	3	10	4	6	7	3	3	3	1	3
Abhd14b	0	2	3	2	6	3	1	2	0	0	0	9	0	1	5	1	6	2	1	3	1	0	4
Abhd15	0	3	2	3	0	4	0	0	0	1	0	2	0	2	2	3	4	4	0	0	1	0	0
Abhd16a	3	8	22	22	29	25	7	14	10	11	3	24	6	13	37	12	31	19	21	7	10	6	24
Abhd17a	0	3	8	11	9	15	6	9	6	12	2	19	4	3	6	3	15	5	9	2	3	1	12
Abhd17b	0	1	3	0	6	7	0	0	3	2	0	6	1	5	7	2	5	2	4	2	6	0	2
Abhd17c	0	0	0	1	1	0	0	1	0	0	0	0	0	1	0	1	2	1	1	0	0	0	2
Abhd18	0	1	2	1	1	1	2	1	2	2	0	4	1	3	2	1	3	0	3	1	1	1	2
Abhd2	0	5	10	8	13	15	7	8	7	15	0	22	10	7	12	8	13	8	5	6	8	1	8
Abhd4	0	1	2	2	1	3	0	9	1	7	0	8	2	1	3	4	4	2	2	2	4	1	2
Abhd5	1	1	5	11	10	7	5	5	4	4	1	12	6	2	7	8	10	4	11	1	7	2	1
Abhd6	0	3	12	13	8	8	5	5	4	7	0	8	4	5	5	5	12	6	4	2	5	3	6
Abhd8	3	18	37	53	63	42	24	31	23	42	9	60	20	28	72	27	48	25	31	12	25	7	54
Abi1	2	35	34	34	52	45	29	38	22	58	5	53	22	30	47	34	54	31	36	20	32	9	45
Abi2	0	2	1	1	5	3	0	2	1	0	0	3	1	0	2	0	4	2	2	0	3	0	2
Abi3	0	8	23	20	24	19	26	45	19	45	5	18	2	9	19	11	27	11	10	6	11	5	21
Abl1	0	1	2	4	5	3	1	6	2	3	0	3	1	2	3	2	8	7	5	1	0	0	6
Abl2	0	0	2	4	2	5	0	0	2	5	1	2	2	3	2	2	1	1	2	2	1	0	0
Ablim1	11	37	79	67	107	110	42	69	35	69	12	157	55	58	110	62	115	69	85	61	62	22	71
Ablim2	0	0	5	2	5	1	0	1	0	0	0	0	2	1	1	1	6	1	1	0	2	0	1
Abr	0	4	12	16	9	11	12	9	6	6	3	19	4	5	11	8	15	9	5	6	3	4	7
Abracl	8	55	117	129	185	137	70	144	91	189	36	162	49	94	128	102	164	111	110	63	102	33	140
Abraxas1	0	1	4	5	5	5	4	6	0	4	0	13	1	3	7	7	5	2	3	1	1	0	6
Abraxas2	0	6	3	9	3	13	7	10	9	13	1	13	9	9	11	11	17	5	5	2	6	1	10
Abt1	4	12	28	25	30	23	15	25	9	20	6	23	6	15	34	9	33	14	21	7	17	5	24
Abtb1	2	7	12	23	24	13	5	13	5	20	0	19	7	8	24	9	23	8	7	6	15	3	10
Abtb2	1	6	8	12	10	9	9	16	6	14	3	16	7	14	20	4	19	11	15	8	6	7	13
Acaa1a	2	18	28	32	60	45	12	32	13	32	3	41	25	20	49	35	36	22	27	19	17	10	38
Acaa1b	0	1	1	0	1	0	0	0	0	0	0	0	0	0	0	0	0	0	0	0	0	0	0
Acaa2	1	18	32	28	59	38	10	22	16	21	2	49	15	21	49	19	52	23	25	13	20	7	25
Acaca	0	0	3	0	1	4	0	1	0	0	0	2	1	0	1	1	5	0	0	1	1	0	1
Acacb	0	0	0	0	2	0	0	0	0	0	0	0	0	0	0	0	0	0	0	0	0	0	0
Acad10	0	1	3	1	4	0	0	0	3	0	0	0	0	1	1	2	1	0	0	0	0	0	1
Acad11	3	1	3	3	2	7	0	1	0	3	0	1	2	1	2	1	0	1	2	0	0	1	2
Acad12	0	1	0	0	0	1	0	0	0	0	0	0	1	0	1	0	0	0	0	0	0	0	0
Acad8	0	3	3	2	8	7	5	5	1	5	0	9	2	1	5	6	7	4	7	1	5	1	8
Acad9	0	0	5	2	2	2	1	2	3	0	1	2	2	2	4	1	6	2	1	0	0	1	1
Acadl	1	13	16	19	37	29	14	40	24	53	7	29	18	15	25	19	43	21	20	14	23	10	26
Acadm	0	9	16	23	34	20	5	15	6	18	3	27	9	12	15	16	21	9	13	7	21	2	17
Acads	0	2	13	7	11	13	1	13	4	13	2	13	6	4	13	9	15	7	11	6	5	1	12
Acadsb	1	2	8	8	11	11	0	8	11	5	4	12	3	9	9	9	5	4	4	1	8	2	6
Acadvl	0	16	28	21	31	17	13	12	12	32	2	35	13	11	38	24	40	18	18	16	17	6	25
Acap1	4	36	91	96	124	100	39	80	37	98	9	122	23	50	118	71	128	51	57	44	35	16	73
Acap2	2	6	11	16	18	11	10	11	4	23	3	16	4	5	24	10	20	10	10	9	11	5	10
Acap3	0	1	3	2	5	4	3	4	3	2	2	10	2	3	3	3	7	2	2	3	3	1	6
Acat1	1	26	30	21	44	38	7	15	11	23	3	43	11	12	46	25	28	13	24	12	14	7	30
Acat2	0	4	5	7	11	12	6	10	7	16	1	21	2	8	13	10	10	13	12	6	7	1	8
Acat3	0	0	0	0	0	0	0	0	0	0	0	0	0	0	0	0	1	0	0	0	0	0	0
Acbd3	0	10	12	6	25	19	7	11	4	4	2	27	4	22	14	16	11	13	8	8	10	3	13
Acbd4	0	2	2	7	3	9	4	6	2	9	1	8	2	3	6	1	8	2	4	1	5	1	7
Acbd5	0	5	18	15	13	11	7	21	7	16	2	22	10	7	15	13	16	13	15	9	15	4	17
Acbd6	3	5	16	14	16	11	14	10	6	14	4	16	8	9	23	6	18	2	15	6	9	5	12
Acbd7	0	0	0	0	0	0	0	1	0	0	0	0	0	0	0	0	0	0	0	0	0	0	0
Accs	0	2	8	2	7	3	0	5	0	2	0	4	1	2	4	5	7	3	0	1	5	0	4
Acd	0	10	19	18	36	29	21	24	15	31	1	35	10	11	29	18	35	19	14	17	18	6	19
Acer2	0	0	0	0	0	2	0	0	1	0	0	0	0	0	0	1	2	0	0	0	0	0	4
Acer3	0	2	2	3	6	1	4	4	1	12	0	4	2	2	7	2	10	4	1	5	2	0	2
Acin1	2	63	82	56	115	127	50	92	38	80	21	116	45	54	92	54	105	64	88	45	76	19	72
Ackr1	0	0	0	0	0	0	0	0	0	0	0	0	0	0	0	0	0	0	0	0	0	0	0
Acly	1	7	29	39	40	36	15	26	12	26	2	35	14	20	36	28	38	22	21	16	24	4	38
Aco1	0	2	6	6	9	3	0	7	6	6	0	6	3	1	7	4	11	5	8	0	2	2	2
Aco2	1	13	33	34	37	44	19	27	14	38	8	61	15	16	36	29	55	22	28	16	22	7	33
Acot1	0	0	0	0	0	0	0	0	0	0	0	0	0	0	0	0	0	0	0	0	0	0	0
Acot10	0	1	6	3	13	13	4	6	3	13	0	8	2	6	13	9	6	3	3	3	4	3	10
Acot11	0	0	3	2	1	0	0	0	1	0	0	1	0	2	1	3	4	0	1	0	0	0	0
Acot13	1	8	28	24	40	25	14	32	13	22	10	36	11	16	17	23	22	15	19	9	16	7	26
Acot2	0	2	8	9	10	11	4	4	2	15	0	12	4	8	14	10	13	8	10	4	4	3	7
Acot6	0	0	1	0	1	0	0	0	0	0	0	0	0	0	3	1	0	0	1	0	0	0	1
Acot7	1	21	43	60	81	42	45	42	29	74	12	57	17	29	61	41	53	32	41	23	39	9	37
Acot8	1	9	10	8	14	18	6	13	5	17	1	13	5	12	20	7	13	10	7	3	11	3	11
Acot9	1	8	9	11	27	18	7	14	7	28	0	19	2	7	25	15	20	9	11	5	7	5	24
Acox1	1	2	4	3	7	3	1	5	3	5	0	3	2	5	6	2	11	4	8	2	2	0	3
Acox3	1	5	3	2	10	11	7	3	0	5	2	7	3	2	13	7	9	0	5	2	3	1	6
Acoxl	0	1	5	4	12	3	3	2	1	3	1	5	1	1	2	3	7	2	0	0	1	2	1
Acp1	1	4	10	11	30	21	4	11	4	21	5	15	7	7	17	16	27	22	6	6	11	3	15
Acp2	0	0	5	2	4	4	2	2	1	1	0	5	0	1	5	3	4	3	0	0	2	0	0
Acp5	3	49	92	66	150	120	29	72	25	73	6	161	63	80	131	94	161	70	76	55	65	42	103
Acp6	2	2	10	7	12	17	3	9	7	9	0	21	7	4	18	16	11	6	11	5	9	4	19
Acp7	0	0	0	0	0	0	0	0	0	0	0	0	0	0	0	0	0	0	0	0	0	0	0
Acpp	0	1	2	0	3	1	0	2	1	7	0	2	2	1	1	0	10	1	2	0	6	0	4
Acrbp	0	0	3	1	4	1	1	1	0	1	0	3	1	4	2	2	1	2	0	0	1	0	1
Acsbg1	0	2	17	23	31	18	15	15	10	19	3	11	5	12	19	7	19	11	7	6	11	1	17
Acsf2	0	0	0	1	0	0	0	0	0	0	0	0	0	0	0	0	1	0	0	0	0	0	0
Acsf3	0	1	2	3	4	1	3	4	2	4	0	2	2	0	2	0	4	0	4	1	0	1	2
Acsl1	0	0	2	2	4	2	1	2	0	2	0	1	3	0	2	4	9	0	4	1	2	2	0
Acsl3	0	1	0	0	0	0	0	0	0	0	0	1	0	0	0	0	2	0	0	2	1	0	0
Acsl4	0	4	4	8	12	19	6	3	3	8	0	15	4	6	11	4	8	4	5	3	12	2	5
Acsl5	0	14	21	22	33	33	9	32	15	44	4	47	16	19	27	9	31	21	21	5	17	9	27
Acsl6	0	0	0	0	0	0	0	0	0	0	0	0	0	0	0	0	0	0	1	0	0	0	0
Acsm3	0	0	0	0	0	0	0	0	0	1	0	0	0	0	0	0	0	0	0	0	0	0	0
Acss1	1	8	9	6	13	8	3	7	4	6	0	20	8	10	13	14	19	14	10	4	5	0	9
Acss2	0	16	26	21	34	25	3	5	6	7	1	43	8	14	23	12	34	12	8	3	8	5	21
Acta1	0	0	0	1	1	0	0	1	0	0	0	3	1	0	0	0	0	0	0	0	0	0	0
Acta2	0	0	0	0	0	0	0	1	0	0	0	1	0	0	0	0	0	0	0	0	0	0	0
Actb	88	1054	2099	2073	2988	2492	1090	1888	1095	2100	331	3251	865	1434	2698	1954	3023	1490	1788	937	1399	539	2168
Actbl2	0	0	0	0	0	0	0	0	0	0	0	0	0	0	0	0	0	0	0	0	0	0	0
Actc1	0	0	0	0	0	0	0	0	0	0	0	0	0	0	0	0	0	0	0	0	0	0	0
Actg-ps1	0	0	0	0	1	0	0	0	0	0	0	0	0	0	0	0	0	0	0	0	0	0	0
Actg1	0	4	6	8	7	11	2	8	2	6	1	12	0	1	12	10	7	7	9	4	4	2	8
Actg2	0	0	0	0	0	0	0	0	2	1	1	1	1	0	0	0	0	0	0	0	1	0	0
Actl6a	0	10	25	31	31	25	15	21	13	32	5	50	12	11	40	22	31	18	26	8	18	6	31
Actn1	0	3	5	7	12	9	2	0	2	2	2	27	6	16	17	13	15	4	14	7	9	2	6
Actn2	0	1	18	26	27	20	12	13	8	26	2	9	3	7	12	15	20	2	7	2	1	0	5
Actn3	0	0	0	0	0	0	0	0	0	0	0	0	0	0	0	0	0	0	0	0	0	0	0
Actn4	0	27	43	52	67	44	16	48	26	54	5	45	18	28	63	53	68	25	33	25	37	11	51
Actr10	2	14	20	32	51	39	11	34	12	23	1	34	10	17	34	19	29	19	23	19	10	4	22
Actr1a	1	12	27	38	50	36	16	25	15	25	7	36	7	29	34	22	38	24	27	15	16	5	35
Actr1b	0	11	25	26	35	25	10	24	8	17	5	32	5	14	21	15	30	16	16	6	14	5	23
Actr2	4	70	111	130	168	150	56	102	64	116	19	158	49	79	132	106	151	81	79	62	76	20	120
Actr3	6	103	186	197	256	189	71	136	58	235	28	325	81	104	223	144	214	126	119	69	119	46	200
Actr3b	0	1	0	0	0	0	0	2	0	1	0	0	1	1	1	1	0	0	0	0	1	1	0
Actr5	0	3	4	2	5	7	1	1	1	1	1	3	1	3	1	1	6	3	4	2	1	1	1
Actr6	0	3	10	7	16	10	2	9	3	4	0	13	0	4	10	15	7	10	7	2	3	2	16
Actr8	1	7	18	27	26	12	10	14	12	23	4	13	10	10	19	22	21	7	18	8	13	4	13
Actrt3	0	2	1	0	1	1	3	2	1	4	1	0	3	0	0	1	0	1	3	0	1	0	2
Acvr1	0	0	0	0	0	0	0	0	0	0	0	0	0	0	0	0	0	0	0	0	0	0	1
Acvr1b	0	1	1	3	1	3	1	1	0	0	0	5	2	4	1	7	2	1	1	0	2	0	5
Acvr2a	0	0	2	0	1	1	0	1	0	2	0	4	3	0	2	0	1	1	0	1	2	1	0
Acvr2b	0	0	0	0	0	0	0	0	0	0	0	0	0	0	0	0	1	0	0	0	1	0	0
Acvrl1	0	0	0	0	0	0	0	0	0	0	0	2	0	0	2	0	0	0	1	0	0	0	0
Acy1	0	4	3	6	7	5	1	2	1	2	0	7	4	4	4	5	5	4	3	4	3	2	5
Acyp1	1	9	17	18	34	14	5	15	7	9	2	40	7	17	23	12	17	10	14	5	14	3	28
Acyp2	0	2	0	1	0	1	0	1	0	0	2	0	0	0	1	2	2	0	1	0	0	0	2
Ada	0	1	4	6	8	3	1	0	1	2	2	6	0	4	4	2	6	1	5	3	0	0	1
Adad1	0	1	0	0	0	0	0	0	0	0	0	0	0	0	0	0	0	0	0	0	0	0	0
Adal	0	5	0	3	3	5	3	1	1	4	1	2	0	2	4	0	1	1	1	0	1	1	1
Adam10	1	20	18	21	24	25	12	26	14	33	7	31	9	18	27	22	36	14	25	13	13	6	31
Adam11	0	0	0	0	0	1	0	0	0	0	0	0	0	0	0	0	1	1	1	3	1	0	2
Adam15	0	0	3	2	5	3	2	1	4	0	0	2	0	0	1	0	2	1	1	1	2	0	0
Adam17	0	8	8	7	11	17	6	15	3	7	4	25	7	8	19	12	15	7	5	1	5	2	15
Adam19	1	8	45	32	27	27	34	57	52	96	9	38	7	14	33	21	30	35	46	23	27	13	30
Adam1b	0	0	0	0	0	0	0	0	0	0	0	0	0	0	0	0	0	0	0	0	0	0	0
Adam22	0	0	0	0	0	0	0	0	0	0	0	0	0	0	0	0	0	0	0	0	0	0	0
Adam23	0	0	0	0	0	0	1	0	0	0	0	0	1	0	0	0	0	0	0	0	0	0	0
Adam30	0	0	0	0	0	1	0	0	0	0	0	0	0	0	0	0	1	0	0	0	0	0	0
Adam4	0	0	0	0	1	0	0	0	0	0	0	0	0	1	2	0	0	0	1	0	0	0	0
Adam8	0	2	5	2	5	5	0	3	2	5	3	5	0	2	1	1	3	0	2	0	1	0	2
Adam9	0	0	0	0	1	0	0	3	0	0	0	1	0	0	3	0	0	4	0	0	2	1	1
Adamdec1	0	0	0	0	0	0	0	0	0	0	0	0	0	0	0	0	0	0	0	0	0	0	0
Adamts1	0	0	1	0	0	0	0	0	0	0	0	0	0	0	0	0	0	0	0	0	0	0	0
Adamts10	1	18	48	28	42	35	19	17	8	20	4	47	20	17	40	27	46	19	12	15	17	11	35
Adamts14	0	0	1	1	0	0	1	0	0	0	0	0	0	0	0	0	0	0	2	0	0	0	1
Adamts18	0	0	0	0	0	0	0	0	0	0	0	0	0	0	0	0	0	0	1	0	0	0	0
Adamts19	0	0	0	0	0	0	0	0	0	0	0	0	0	0	0	0	0	0	0	0	0	0	0
Adamts6	0	1	0	2	1	2	0	0	2	1	0	1	1	0	0	2	0	0	1	0	1	0	0
Adamtsl1	0	0	0	0	0	0	0	0	0	0	0	0	0	0	0	0	0	0	0	0	0	0	0
Adamtsl2	0	0	0	0	0	1	0	0	0	0	0	0	0	0	0	0	0	0	0	0	0	0	0
Adamtsl4	0	0	0	0	0	0	0	0	0	0	0	0	0	0	0	0	0	0	1	0	0	0	1
Adap1	0	2	2	3	1	0	7	5	1	0	3	2	0	1	1	0	0	1	1	0	0	1	0
Adap2	0	0	0	0	0	0	0	0	0	0	0	0	0	0	0	0	0	0	0	0	0	0	0
Adap2os	0	0	0	0	0	0	0	0	0	0	0	0	0	0	0	0	0	0	0	0	0	0	0
Adar	1	3	7	12	16	15	9	12	6	9	1	22	11	14	16	10	16	11	14	5	6	2	15
Adarb1	0	1	0	0	0	0	0	0	0	0	0	0	0	0	0	0	0	0	1	0	0	0	0
Adat1	0	1	1	0	6	4	0	1	0	2	0	4	0	0	7	1	3	3	7	1	0	0	0
Adat2	0	1	2	1	3	1	1	2	0	2	0	0	0	2	1	0	0	0	2	2	1	0	3
Adck1	0	2	2	2	12	11	1	9	0	4	1	6	1	8	3	4	7	3	1	4	1	1	9
Adck2	0	4	5	6	10	8	4	8	1	5	0	9	3	7	14	5	5	7	3	2	3	1	4
Adck5	0	5	5	7	8	5	5	7	4	4	2	11	2	7	8	5	15	8	6	5	5	6	4
Adcy3	0	3	3	2	3	0	3	3	1	2	1	8	0	3	1	2	4	2	3	1	6	1	5
Adcy4	0	0	0	0	0	0	0	0	0	0	0	0	0	0	1	0	0	0	0	0	0	0	0
Adcy5	0	0	0	0	0	0	0	0	0	0	0	0	0	0	0	0	0	0	0	0	0	0	0
Adcy6	0	0	0	0	0	0	1	0	0	0	0	1	0	0	0	0	0	0	0	0	0	0	0
Adcy7	1	22	36	41	54	36	20	41	9	35	9	66	15	17	42	37	44	15	32	14	22	8	26
Adcy8	0	0	1	0	0	0	0	0	0	0	0	0	0	0	0	0	0	0	0	0	0	0	0
Adcy9	0	0	0	1	0	0	0	0	0	0	0	0	0	0	0	0	0	0	0	0	0	0	0
Add1	4	9	23	30	46	25	18	17	9	12	6	50	14	33	52	32	41	17	30	12	17	3	23
Add2	0	0	0	0	0	0	0	0	0	0	0	0	0	0	0	0	0	0	0	0	0	0	0
Add3	4	26	50	33	62	54	29	30	16	39	10	92	22	39	79	44	89	38	45	35	36	14	54
Adgb	0	0	0	0	0	0	0	0	0	0	0	0	0	0	0	0	0	0	1	0	0	0	0
Adgra2	0	0	0	0	0	0	0	0	0	0	0	0	0	0	0	0	0	0	0	0	0	0	0
Adgrb2	0	0	0	0	2	2	1	0	0	1	0	1	1	1	2	0	0	0	0	1	2	0	2
Adgrd1	0	0	2	0	0	0	2	1	0	0	0	1	0	0	0	0	0	0	1	0	0	0	0
Adgre1	0	0	0	0	0	0	0	0	0	0	0	0	0	0	1	0	0	0	0	0	0	0	0
Adgre4	0	0	0	0	0	0	0	0	0	0	0	0	0	0	0	0	0	0	0	0	0	0	0
Adgre5	2	35	95	80	149	116	49	73	35	95	16	118	38	66	117	80	118	66	60	33	57	20	80
Adgrf5	0	0	0	0	0	0	0	0	0	0	0	0	0	0	0	1	0	0	0	0	0	0	0
Adgrg1	0	2	1	5	7	0	14	29	24	59	6	1	0	2	1	1	2	1	2	2	3	0	2
Adgrg3	0	2	2	0	5	1	0	3	1	3	0	3	1	0	4	2	2	0	2	0	0	0	0
Adgrg5	2	21	51	51	91	50	2	3	3	10	1	63	6	20	65	41	54	9	13	8	20	8	23
Adgrl1	0	1	2	1	2	4	0	7	1	1	1	7	2	0	4	2	0	3	3	2	1	1	2
Adgrl2	0	0	0	0	0	1	0	0	0	0	0	0	0	0	1	0	0	0	0	0	0	1	0
Adgrl3	0	0	0	0	0	0	0	0	0	0	0	0	0	0	0	0	0	0	0	0	0	0	0
Adgrl4	0	0	0	0	0	0	0	1	0	0	0	0	0	0	0	0	0	0	0	0	0	0	0
Adgrv1	0	0	0	0	1	0	0	0	0	0	0	0	0	0	0	1	2	0	0	0	0	0	0
Adh1	0	0	0	0	0	0	0	0	0	0	0	0	0	0	1	0	0	0	0	0	1	0	0
Adh4	0	0	0	0	0	1	0	0	0	0	0	0	0	0	0	0	0	0	0	0	0	0	0
Adh5	2	18	36	44	61	41	13	24	18	36	8	51	10	18	50	33	44	24	30	17	19	7	39
Adhfe1	0	0	0	0	0	0	0	0	0	0	0	0	0	0	0	0	0	0	0	0	0	0	0
Adi1	1	6	22	11	28	21	9	9	6	9	2	37	10	16	26	14	22	8	5	8	9	2	14
Adipoq	0	0	0	0	0	0	0	0	0	0	0	0	0	0	0	0	0	0	0	0	0	0	0
Adipor1	1	21	19	23	48	32	20	35	19	43	11	39	18	15	35	25	44	21	21	6	22	8	34
Adipor2	1	3	7	5	8	8	4	5	3	10	4	7	3	4	5	8	18	4	5	5	9	0	8
Adk	2	2	3	3	5	11	4	4	0	2	0	12	3	5	11	5	6	7	9	6	5	1	6
Adm	1	0	0	0	0	0	1	1	0	0	0	0	0	1	0	0	1	0	0	1	0	0	0
Adm2	0	0	0	0	0	0	0	0	0	0	0	0	0	0	0	0	0	0	0	0	0	0	0
Adnp	0	2	0	0	0	0	0	0	0	0	0	0	0	0	0	0	0	0	0	0	0	0	0
Adnp2	0	0	1	3	2	1	1	2	1	3	0	4	3	1	1	2	0	2	2	1	0	0	1
Ado	1	0	2	2	4	3	1	4	1	1	0	0	0	0	0	3	3	1	1	2	4	0	2
Adora2a	0	2	11	14	9	16	3	4	4	12	2	12	1	5	5	3	18	2	5	4	5	2	4
Adora3	0	0	0	0	0	0	0	0	0	1	0	0	0	0	0	0	0	0	0	0	0	0	0
Adpgk	0	7	3	11	9	12	1	11	1	10	0	15	3	11	9	10	21	16	6	7	11	8	17
Adprh	3	36	91	82	132	75	48	67	43	80	20	120	45	62	121	64	93	41	57	40	46	20	90
Adprhl2	1	3	17	18	37	19	4	19	9	26	7	24	11	9	23	12	28	6	23	8	14	5	21
Adprm	0	6	6	17	19	16	14	17	7	23	0	26	6	6	18	7	14	9	15	5	11	5	18
Adra1b	0	0	0	0	0	0	0	0	0	0	0	0	1	0	0	0	0	0	0	0	0	0	0
Adra2a	0	0	0	0	0	0	0	0	0	0	0	0	0	0	0	0	0	0	1	0	0	0	0
Adra2b	0	0	0	0	0	0	0	0	0	0	0	0	0	0	1	0	0	0	0	0	0	0	0
Adrb1	0	1	4	1	4	2	1	4	2	4	0	1	0	3	2	2	0	1	1	1	1	0	1
Adrb2	1	12	19	25	21	32	4	12	7	9	1	16	9	12	20	26	25	6	9	5	16	4	18
Adrm1	0	14	37	28	42	38	21	38	11	35	9	61	17	26	40	39	44	23	17	15	24	7	34
Adsl	1	7	23	16	31	26	7	20	8	27	1	32	10	15	33	17	26	12	8	12	16	2	22
Adss	1	9	34	24	34	36	11	22	17	36	3	49	14	19	39	29	44	26	23	13	31	5	21
Adssl1	0	0	0	1	0	2	0	2	0	0	0	1	0	2	0	2	2	0	0	1	2	0	0
Aebp1	0	0	0	0	0	0	0	0	0	0	1	0	0	0	0	0	1	0	0	0	0	0	0
Aebp2	1	5	10	7	10	9	5	13	5	8	0	17	9	11	12	4	5	8	10	6	9	1	8
Aen	0	1	0	1	5	0	1	2	1	2	1	1	0	1	3	7	4	1	1	0	0	0	4
Aes	3	25	46	33	67	52	34	53	27	64	13	68	24	30	66	34	62	36	41	15	21	11	47
Afap1	1	0	2	2	1	2	0	1	0	1	0	1	0	0	3	2	0	1	2	1	1	1	0
Afdn	0	2	1	5	2	2	3	0	1	0	0	9	2	5	3	3	3	1	0	0	0	0	1
Aff1	0	4	1	1	6	4	1	4	2	8	0	3	2	6	7	2	5	2	4	4	3	1	4
Aff2	0	0	0	0	0	1	0	0	0	0	0	0	0	0	0	0	0	0	0	0	0	0	0
Aff3	0	6	6	2	1	9	0	0	0	2	0	16	6	7	7	8	15	7	5	6	5	3	12
Aff4	0	9	7	3	5	8	9	10	4	9	2	13	6	3	8	4	12	8	6	4	1	0	6
Afg1l	0	0	0	1	4	3	0	4	2	0	0	4	2	2	4	0	3	0	0	0	0	0	1
Afg3l1	2	19	29	24	34	29	19	17	7	27	3	25	8	7	28	21	39	14	16	12	21	3	26
Afg3l2	0	10	32	25	48	21	16	26	15	25	3	24	9	26	40	19	32	18	17	16	11	7	20
Afm	0	0	0	0	0	0	1	0	0	0	0	0	0	0	0	0	0	0	0	0	0	0	1
Afmid	0	0	0	1	0	2	0	1	0	0	2	2	0	0	1	1	2	0	0	0	0	0	1
Afp	0	1	1	4	8	2	1	2	1	2	0	6	3	0	5	0	0	0	2	0	0	0	2
Aftph	0	2	14	16	17	10	11	12	9	12	4	18	6	6	19	15	19	9	3	6	17	1	18
Aga	0	7	8	9	12	16	3	6	3	12	1	11	7	2	8	12	9	9	4	3	8	2	11
Agap1	0	0	0	1	0	0	0	0	0	0	0	2	0	1	0	0	0	0	1	0	0	0	0
Agap2	0	3	10	9	11	14	3	8	7	15	2	15	3	13	10	6	11	4	8	2	8	1	9
Agap3	0	2	5	3	3	2	0	7	1	1	0	3	0	1	2	2	3	2	0	2	2	0	5
Agbl1	0	0	0	0	0	0	0	0	0	0	0	0	0	0	0	0	0	0	0	0	0	0	0
Agbl3	0	0	0	1	0	0	0	1	1	1	0	0	0	0	0	0	1	0	4	0	0	0	0
Agbl5	0	0	1	0	1	0	1	1	0	0	1	2	2	0	1	0	1	0	0	0	1	0	1
Ager	0	0	0	0	0	0	0	0	0	0	0	2	0	0	1	0	0	1	0	0	0	0	0
Agfg1	0	6	9	10	17	16	10	23	15	24	10	22	8	10	9	10	18	6	8	7	12	1	12
Agfg2	0	4	16	11	12	24	6	16	5	10	3	11	6	7	16	11	20	4	5	1	10	1	7
Aggf1	0	10	6	13	16	15	6	20	8	11	5	26	2	13	4	6	12	5	2	6	6	1	5
Agk	0	7	2	6	3	6	1	8	4	3	0	11	2	2	4	6	5	2	7	1	3	0	5
Agl	0	1	3	0	4	3	3	3	1	4	0	3	0	0	1	3	3	2	5	0	2	0	1
Ago1	0	3	1	1	3	1	0	3	2	1	0	3	2	1	3	0	2	1	3	0	1	0	2
Ago2	0	2	12	5	10	6	2	3	5	7	1	15	3	6	7	6	10	6	6	3	3	1	9
Ago3	0	5	6	2	5	6	4	7	2	4	0	4	3	0	2	2	6	0	3	0	4	0	2
Ago4	0	0	0	0	0	0	0	0	0	0	0	0	0	0	0	1	0	0	0	0	0	0	0
Agpat1	0	5	13	14	17	8	7	11	12	11	4	20	7	7	10	7	16	10	16	9	2	4	18
Agpat2	0	1	3	1	7	6	1	2	5	4	1	10	4	3	10	3	3	1	4	0	4	3	7
Agpat3	3	14	29	32	35	36	29	65	19	57	9	59	12	18	41	24	42	30	41	15	20	10	42
Agpat4	0	1	7	4	4	8	6	11	9	23	1	12	4	6	9	13	8	9	9	7	10	0	15
Agpat5	0	7	15	8	15	10	5	7	3	5	0	25	4	7	11	6	13	6	16	7	10	5	10
Agps	1	2	3	1	2	2	0	7	1	1	1	6	2	2	6	2	3	1	4	4	1	1	2
Agr3	0	0	0	0	0	0	0	0	0	0	0	0	0	0	0	0	1	0	0	0	0	0	0
Agrn	0	0	0	0	0	1	0	2	0	1	0	1	0	0	0	0	1	0	0	0	0	0	0
Agrp	0	1	0	1	2	1	0	0	0	0	1	3	1	1	1	1	2	1	1	0	0	1	2
Agt	0	0	0	0	0	1	0	0	0	0	0	0	0	0	0	1	0	0	0	0	0	0	0
Agtpbp1	0	3	2	7	9	2	0	2	1	4	1	6	2	3	3	2	3	3	6	4	3	1	6
Agtr1a	0	0	0	0	0	0	0	0	0	0	0	0	0	0	0	0	0	0	0	0	0	0	0
Agtrap	2	5	12	2	9	12	1	6	1	8	0	9	2	4	5	7	11	8	10	2	5	3	10
Ahctf1	0	8	1	2	6	5	5	3	6	5	1	9	4	4	7	3	11	4	3	6	2	4	5
Ahcy	0	0	3	2	9	3	6	2	0	5	2	7	1	6	9	6	11	3	5	1	1	0	7
Ahcyl1	0	0	4	3	6	6	0	1	4	5	0	7	0	0	3	1	5	2	3	0	1	0	2
Ahcyl2	0	1	3	0	4	1	2	1	1	3	0	4	1	3	4	0	7	2	1	2	2	0	3
Ahdc1	1	1	3	3	3	10	3	6	0	2	0	8	0	2	4	3	1	4	0	2	2	0	7
Ahi1	1	5	6	7	7	8	6	5	1	6	0	13	4	4	10	10	8	3	2	2	5	1	9
Ahnak	10	127	272	223	296	442	66	113	73	116	29	379	88	177	255	228	404	149	186	137	139	54	245
Ahr	0	1	2	1	1	2	1	4	0	5	1	0	1	0	0	1	0	0	1	3	1	0	2
Ahrr	0	0	0	0	0	0	0	0	0	0	0	0	0	0	0	0	0	0	0	0	0	0	0
Ahsa1	0	36	47	70	77	58	20	50	23	56	5	80	32	41	70	59	66	33	52	21	34	14	67
Ahsa2	0	3	10	13	15	5	2	12	6	16	2	14	2	8	12	7	7	8	6	8	7	2	13
Ahsg	0	0	0	0	1	0	0	0	0	0	0	0	1	0	0	0	0	0	0	0	0	0	0
Aicda	0	0	0	0	0	1	0	0	0	0	0	0	0	0	0	0	0	0	0	0	0	0	0
Aida	0	0	3	2	2	4	4	3	2	7	1	4	2	3	7	2	3	5	2	2	2	0	1
Aif1	0	0	0	0	1	2	1	1	0	2	0	19	1	4	2	2	1	4	1	1	2	2	5
Aifm1	0	3	9	11	11	6	3	10	7	11	2	19	6	7	7	3	19	7	17	2	6	0	10
Aifm2	0	1	0	4	4	0	0	2	1	1	0	3	0	0	0	2	3	2	0	0	0	0	0
Aig1	1	2	4	8	4	5	2	4	2	7	2	14	5	3	5	0	7	7	4	3	2	1	4
Aim2	0	1	8	9	12	10	8	17	8	26	4	9	4	9	9	3	19	9	8	6	6	3	10
Aimp1	3	23	25	20	44	41	12	29	10	21	3	60	10	13	29	23	29	21	16	9	13	9	29
Aimp2	0	12	22	14	39	21	6	12	9	27	3	32	18	14	42	29	30	17	19	8	18	4	29
Aip	1	17	39	40	54	42	13	48	10	41	4	55	11	23	42	31	53	26	31	13	24	8	43
Aipl1	0	0	0	0	0	1	0	0	0	0	0	0	0	0	0	1	0	0	0	0	0	0	0
Aire	0	0	0	0	0	0	0	0	0	0	0	0	0	0	0	0	0	0	0	0	0	0	0
Airn	0	0	0	0	0	0	2	1	1	0	0	0	0	0	0	0	1	4	0	0	1	0	0
Ajm1	0	0	0	0	0	0	0	0	0	0	0	0	0	0	0	0	1	0	0	0	0	0	0
Ajuba	0	0	0	0	0	0	0	0	0	0	0	1	0	0	0	0	0	0	0	0	0	0	0
Ak2	4	28	36	47	52	38	17	35	19	44	7	60	13	23	56	37	58	24	34	17	23	12	54
Ak3	0	5	5	12	13	19	3	12	6	16	1	13	6	6	18	8	13	8	6	1	9	6	12
Ak6	0	5	7	11	10	8	3	13	6	14	1	20	4	4	9	8	10	9	2	4	9	2	5
Ak7	0	0	0	0	0	0	0	0	0	0	0	0	0	0	0	0	0	0	0	0	0	0	0
Ak8	0	0	0	0	0	1	0	0	0	0	0	0	1	1	1	1	1	1	0	0	0	0	3
Akap1	0	0	0	0	0	0	0	0	0	0	0	0	0	2	1	0	0	0	0	0	0	0	0
Akap10	0	0	6	5	8	11	3	4	1	6	1	14	2	6	8	6	12	5	12	1	7	3	4
Akap11	0	5	8	6	3	9	5	7	2	7	1	5	1	5	5	5	5	6	8	6	4	2	2
Akap12	0	4	2	0	1	1	1	4	1	4	2	2	0	0	2	4	3	2	0	1	0	0	2
Akap13	2	58	100	67	109	147	59	108	55	103	19	122	42	72	107	62	124	72	76	53	73	20	85
Akap17b	0	0	1	1	3	1	0	1	0	1	0	0	0	1	3	2	0	0	1	1	0	0	1
Akap2	0	0	0	0	0	0	0	0	0	0	0	0	0	1	0	0	1	0	0	0	0	0	1
Akap5	0	0	0	0	0	0	0	0	0	0	0	0	0	0	0	0	0	0	0	0	0	0	0
Akap7	0	1	0	0	1	2	0	0	0	0	0	1	0	0	0	0	1	0	0	0	0	0	0
Akap8	1	35	63	46	74	71	39	69	36	65	9	83	26	51	89	44	84	47	41	29	51	15	53
Akap8l	1	26	38	27	54	41	22	52	10	48	4	37	17	43	41	38	56	28	21	20	20	12	44
Akap9	5	15	33	38	44	45	14	35	29	38	5	75	19	24	43	29	56	26	34	11	28	4	41
Akip1	0	7	18	21	16	17	6	17	2	19	2	39	7	6	19	8	18	8	6	17	10	4	11
Akirin1	0	3	15	28	34	24	18	21	14	17	11	37	14	15	23	17	22	14	16	15	17	4	25
Akirin1-ps	0	0	0	0	0	0	0	0	0	0	0	0	0	0	0	0	0	0	0	0	0	0	1
Akirin2	1	0	3	3	3	5	3	2	1	7	1	8	1	5	6	4	4	3	3	4	3	1	3
Akna	2	35	56	51	60	53	33	82	42	83	16	78	21	30	47	30	64	29	33	27	41	13	47
Aknaos	0	0	0	0	0	0	0	1	0	0	0	0	0	0	0	0	0	0	0	0	0	0	0
Akr1a1	2	38	70	69	125	90	56	73	45	88	14	102	25	43	91	71	102	50	73	32	49	11	76
Akr1b10	0	3	4	3	5	6	10	4	2	6	0	9	0	5	7	4	9	6	4	2	8	0	1
Akr1b3	1	18	49	37	41	50	15	47	23	39	3	58	10	23	48	29	39	26	34	17	27	9	42
Akr1b8	0	0	0	0	0	0	0	0	0	0	0	0	0	0	0	1	0	0	0	0	0	0	0
Akr1c12	1	0	2	2	2	4	3	2	0	4	0	2	1	1	1	1	0	0	0	0	1	0	0
Akr1c13	2	7	14	17	18	14	6	14	6	14	0	20	5	11	16	12	19	3	8	4	9	2	11
Akr1c6	0	0	2	0	0	0	0	0	0	0	0	0	1	0	0	0	0	0	0	0	0	0	0
Akr1cl	0	0	1	0	0	0	0	0	0	0	0	0	0	0	0	0	0	0	0	0	0	0	0
Akr1e1	2	5	3	3	2	4	6	12	4	4	0	11	1	4	2	3	5	7	4	2	6	1	3
Akr7a5	0	5	10	6	15	13	5	9	6	4	2	21	8	8	14	11	16	6	15	6	9	1	13
Akt1	0	0	4	5	8	1	2	2	6	4	2	9	0	1	8	7	5	2	4	1	2	0	4
Akt1s1	0	1	1	1	2	4	0	1	1	2	0	5	2	3	4	0	4	3	0	2	1	0	4
Akt2	0	8	16	14	22	24	9	15	6	18	5	22	10	18	22	29	20	11	14	10	15	5	26
Akt2-ps	0	0	0	0	2	4	0	3	0	1	0	2	0	2	1	1	3	1	1	1	1	0	0
Akt3	0	5	3	9	6	6	1	2	3	2	0	12	0	13	9	7	6	4	8	4	2	1	4
Aktip	0	5	5	9	6	6	0	8	3	9	0	9	2	4	4	4	4	8	4	1	6	0	2
Alad	0	10	17	18	30	28	11	17	9	15	5	23	4	8	27	25	16	15	17	4	7	5	11
Alas1	0	1	11	5	13	9	1	9	2	8	0	5	4	1	13	7	11	4	4	0	1	3	6
Alas2	0	6	2	2	9	11	13	14	3	4	3	4	6	3	13	4	9	7	9	0	3	3	16
Alb	2	1	5	2	6	5	0	2	2	1	1	2	1	2	4	4	10	0	0	1	0	0	0
Alcam	0	1	2	6	1	2	2	1	7	9	1	4	3	2	2	2	9	4	4	2	5	2	3
Aldh16a1	0	3	5	3	10	3	2	4	4	4	0	13	3	3	8	3	6	7	9	2	2	0	8
Aldh18a1	1	8	18	21	21	19	12	11	10	20	1	27	10	6	21	23	24	17	14	3	14	3	17
Aldh1a1	0	0	0	0	0	0	0	0	0	0	0	0	0	0	1	0	0	1	0	0	0	0	0
Aldh1a2	0	0	0	0	0	0	0	0	0	0	0	1	0	0	0	0	0	0	0	0	0	0	0
Aldh1a3	0	0	1	0	0	0	0	0	0	0	0	0	0	0	0	0	0	0	0	0	0	0	0
Aldh1b1	0	0	0	1	4	2	1	0	0	1	0	0	1	3	1	2	5	3	0	1	0	0	0
Aldh2	0	0	1	2	0	6	1	0	0	0	0	4	1	1	4	6	3	7	5	0	0	0	5
Aldh3a1	0	0	0	0	0	0	0	0	0	0	0	0	0	0	0	0	0	0	0	0	0	0	0
Aldh3a2	0	7	8	6	12	4	3	10	6	7	3	10	2	3	12	3	10	5	8	7	7	2	10
Aldh3b1	0	0	0	0	1	6	0	0	1	0	0	1	0	2	2	8	5	2	1	0	1	0	3
Aldh4a1	0	5	4	0	3	12	3	6	2	4	2	6	3	4	5	7	7	6	0	1	3	0	4
Aldh5a1	0	0	0	0	1	0	0	1	0	0	0	0	0	0	0	0	2	0	0	0	1	1	1
Aldh6a1	1	1	0	1	1	1	0	1	1	3	0	3	0	1	8	3	2	1	3	3	0	0	2
Aldh7a1	0	1	0	0	3	2	2	0	0	5	1	0	2	0	1	2	0	2	2	3	2	0	2
Aldh8a1	0	0	0	0	0	1	0	0	0	0	0	0	0	0	0	0	0	0	0	0	0	0	0
Aldh9a1	0	12	26	29	29	24	7	19	8	18	1	21	6	10	30	15	30	13	14	6	7	3	18
Aldoa-ps4	0	0	2	3	0	1	1	2	0	5	0	1	0	2	1	2	2	1	2	1	0	0	0
Aldoart1	0	0	0	2	1	1	0	0	0	3	0	0	0	2	5	1	1	2	0	2	2	0	1
Aldoart2	0	0	0	1	1	0	0	0	1	2	0	1	0	3	0	1	1	1	3	0	1	0	0
Aldob	0	1	0	0	0	0	0	0	0	0	0	0	1	0	0	0	0	0	0	0	0	0	0
Aldoc	0	1	0	0	1	3	0	0	0	1	0	2	0	2	1	0	1	1	0	0	0	1	2
Alg1	0	9	7	13	15	20	3	12	2	10	1	14	4	7	12	13	12	7	7	2	7	4	13
Alg10b	0	2	1	4	4	2	1	1	0	1	0	0	0	3	3	2	3	0	1	1	0	0	1
Alg11	2	4	1	5	6	6	4	5	4	7	1	15	1	0	5	3	7	0	8	3	2	2	2
Alg12	0	3	0	5	3	3	1	3	4	4	0	6	4	2	4	3	2	2	4	1	1	1	4
Alg13	0	2	1	2	4	1	0	0	1	0	1	1	0	1	3	1	1	1	0	3	3	0	1
Alg14	0	2	2	2	8	3	1	4	1	2	0	5	1	3	4	5	3	2	2	1	2	1	6
Alg2	0	0	1	0	4	4	3	3	2	5	1	2	0	1	5	3	3	1	2	1	0	0	2
Alg3	0	2	4	1	9	9	4	6	1	1	0	9	4	1	3	4	6	0	3	2	0	2	7
Alg5	5	23	27	35	55	29	21	19	17	42	7	50	8	24	50	25	46	37	29	8	27	9	36
Alg6	0	3	1	1	1	0	1	4	0	2	0	0	0	0	1	1	2	1	1	0	0	2	2
Alg8	0	0	3	4	3	4	1	1	2	4	0	9	1	5	4	1	5	5	0	1	0	1	6
Alg9	0	1	0	1	3	3	3	2	1	1	0	4	0	0	0	0	1	2	4	1	0	0	2
Alk	0	0	0	0	0	0	0	0	0	0	0	0	0	0	0	0	0	0	0	1	0	0	0
Alkal1	0	0	0	0	0	0	0	0	0	0	0	0	0	0	0	0	0	0	1	0	0	0	0
Alkal2	0	0	0	0	0	1	0	0	0	1	0	0	0	0	0	0	0	0	0	0	0	0	0
Alkbh1	3	6	17	12	14	22	4	13	18	29	2	22	7	14	19	15	15	8	15	8	14	0	17
Alkbh2	0	4	8	8	12	9	3	9	4	14	0	10	2	1	7	5	11	4	5	7	6	3	8
Alkbh3	1	10	13	13	20	21	10	12	13	21	6	11	7	18	13	13	31	14	8	7	6	2	16
Alkbh4	1	8	18	23	16	10	11	17	4	11	2	29	12	10	20	12	24	13	8	9	9	2	17
Alkbh5	0	7	19	22	32	18	9	17	14	31	1	27	10	7	27	16	15	10	17	9	19	2	9
Alkbh6	2	16	21	18	24	17	12	15	10	22	8	31	9	12	21	28	28	15	11	12	12	6	15
Alkbh7	0	6	6	10	7	14	6	6	3	5	2	14	4	3	16	6	16	3	7	1	7	2	9
Alkbh8	0	2	0	6	6	5	4	2	2	5	1	5	1	5	4	7	6	5	6	3	2	0	1
Alms1	0	0	0	0	0	0	0	2	0	0	0	1	0	0	0	0	0	0	0	0	0	0	0
Alox12	0	0	0	0	0	0	2	0	1	0	0	0	0	0	0	0	0	0	0	0	0	0	0
Alox5	0	0	0	0	0	0	0	0	0	0	0	0	0	1	0	0	0	0	0	0	0	0	0
Alox5ap	0	1	0	1	1	15	1	1	0	2	0	15	9	18	11	23	28	26	19	7	8	8	26
Alox8	0	0	0	0	1	0	1	5	1	5	1	2	0	1	0	1	2	2	1	0	2	2	4
Aloxe3	0	0	0	0	0	0	0	1	0	0	0	0	0	0	0	0	0	0	0	0	0	0	0
Alpk1	0	0	0	0	0	0	0	0	0	0	0	0	0	0	1	0	1	0	1	0	0	0	0
Alpk2	0	0	1	0	0	0	1	0	1	0	1	1	0	0	0	0	0	0	1	0	0	0	0
Alpl	0	0	0	0	0	0	0	0	0	0	0	0	0	0	0	0	0	0	0	0	0	0	0
Als2	0	0	0	1	0	0	1	2	0	0	0	0	0	1	1	1	0	1	2	0	1	0	4
Als2cl	0	8	5	6	9	13	1	6	3	4	0	15	8	4	15	6	8	5	4	2	6	1	10
Alyref	0	1	5	1	12	5	5	8	4	3	2	7	1	1	3	2	10	5	5	5	6	1	6
Alyref2	0	6	1	8	16	5	3	7	4	8	0	15	3	7	7	10	9	5	6	4	4	1	3
Amacr	0	2	2	2	3	5	2	3	3	1	0	3	0	0	4	1	5	3	3	2	1	2	1
Ambp	0	0	0	0	0	0	0	0	0	0	0	0	0	0	0	0	0	0	0	0	0	0	0
Ambra1	0	6	8	2	12	9	2	11	3	6	4	8	6	3	9	6	14	6	8	5	8	4	10
Amd-ps1	0	0	0	0	0	0	0	0	0	0	0	0	0	0	0	0	1	0	0	0	0	0	0
Amd1	0	3	5	4	4	3	2	0	0	2	0	3	0	5	6	1	3	2	1	1	1	0	3
Amd2	0	0	0	0	0	0	1	0	0	1	0	1	0	0	0	0	0	0	0	0	0	0	1
Amdhd1	0	0	0	0	1	1	0	2	0	1	0	0	0	1	0	0	1	0	0	0	0	0	1
Amdhd2	0	6	13	14	21	5	4	8	4	9	2	15	2	3	24	8	17	10	3	4	6	2	6
Amer1	0	1	5	2	3	1	1	3	1	3	0	8	1	2	7	0	7	1	6	1	4	0	4
Amer2	0	0	0	0	0	0	0	0	0	0	0	0	0	0	0	0	0	0	0	0	0	0	0
Amfr	0	3	9	10	7	5	5	9	4	6	1	4	1	3	7	2	12	2	4	4	3	0	6
Amhr2	0	0	0	0	0	0	0	0	1	0	0	0	0	0	0	0	0	0	0	0	0	0	0
Amigo1	0	0	0	1	0	0	0	1	0	0	0	0	0	2	0	2	0	0	0	1	0	0	1
Amigo2	0	0	0	0	0	0	0	0	0	0	0	0	0	0	0	0	0	0	0	0	0	0	0
Amigo3	0	0	0	2	0	0	0	0	1	0	0	0	0	0	0	0	2	0	0	0	0	0	0
Ammecr1	0	1	2	0	1	3	0	1	0	0	0	1	0	0	1	0	0	3	0	0	0	1	0
Ammecr1l	1	4	3	5	8	5	5	4	1	2	0	3	3	2	7	3	6	1	8	5	4	0	7
Amn	0	1	0	0	0	0	0	1	0	0	0	0	0	0	1	0	1	0	0	0	0	0	1
Amn1	0	3	7	2	10	4	2	9	2	9	1	11	0	7	3	2	4	3	6	0	6	1	5
Amotl2	0	0	0	0	0	0	0	0	0	0	0	0	0	0	0	0	0	0	0	0	0	0	0
Ampd1	0	0	1	0	0	0	0	0	0	0	0	0	1	0	0	0	1	0	0	0	0	0	1
Ampd2	0	1	5	10	20	13	1	7	4	13	3	9	3	4	10	4	11	8	11	2	10	1	4
Ampd3	0	0	1	0	0	1	0	0	0	0	0	1	0	0	0	0	1	1	1	0	0	0	0
Amt	0	0	0	1	1	0	0	0	0	0	0	0	0	0	0	0	0	0	0	0	0	1	1
Amy1	0	0	0	0	0	0	0	0	0	0	0	0	0	0	0	0	0	0	0	0	0	0	1
Amz1	0	0	0	0	1	0	0	0	0	1	0	1	0	0	0	0	1	2	2	0	0	0	1
Amz2	1	6	10	8	13	19	3	9	2	6	0	11	10	6	12	4	16	3	4	3	7	2	10
Anapc1	0	4	8	9	9	9	7	4	2	11	1	18	2	4	8	10	10	7	10	2	9	3	11
Anapc10	0	4	8	17	21	16	6	7	3	15	3	10	5	7	17	18	15	6	6	8	6	3	14
Anapc11	2	32	57	48	87	79	20	46	33	58	4	103	20	29	62	47	86	38	34	32	46	10	49
Anapc13	4	19	50	39	81	54	21	44	22	52	6	66	20	25	66	39	68	22	37	24	25	11	40
Anapc15	1	1	6	1	18	8	5	5	3	5	0	10	4	5	13	3	8	9	5	6	6	4	15
Anapc15-ps	0	0	2	1	0	1	0	0	0	0	0	3	1	0	2	0	0	1	0	0	1	0	0
Anapc16	1	17	23	27	26	20	11	26	13	32	6	39	7	24	17	20	28	11	22	12	25	6	22
Anapc2	0	3	6	13	14	13	4	6	5	14	4	23	10	8	12	5	12	7	3	6	7	2	14
Anapc4	1	6	9	16	12	9	8	11	7	18	2	10	1	11	15	15	17	12	14	8	7	4	13
Anapc5	1	27	56	43	70	59	10	35	19	33	6	78	29	27	63	39	77	35	43	26	32	8	63
Anapc7	0	12	6	12	18	13	5	8	3	12	0	13	7	7	9	5	21	14	10	4	10	2	6
Ang	0	0	0	1	0	0	0	0	0	0	0	0	0	0	0	0	0	0	1	2	1	0	0
Angel1	0	1	1	4	0	4	0	2	0	3	0	2	2	0	3	1	1	0	2	0	3	1	1
Angel2	0	5	20	8	24	20	11	15	9	17	4	29	7	12	18	15	26	11	11	7	15	5	13
Angpt1	0	0	0	0	0	0	0	0	0	0	0	0	0	0	0	0	0	0	0	0	0	0	0
Angpt2	0	0	1	0	0	0	0	0	0	0	0	2	1	0	0	0	0	0	1	0	0	0	0
Angpt4	0	0	0	0	0	0	0	0	0	0	0	0	0	0	0	0	0	0	0	0	0	0	0
Angptl2	0	0	0	0	0	0	0	0	0	0	0	1	0	0	0	0	0	0	0	1	0	0	0
Angptl3	0	0	0	0	0	0	0	0	0	0	1	0	0	0	0	0	0	0	0	0	0	0	0
Angptl4	0	1	1	4	5	8	0	2	2	1	1	15	0	1	3	1	5	1	1	1	3	0	1
Angptl6	0	1	5	4	2	5	0	2	0	1	0	2	0	3	2	2	4	0	3	0	1	0	5
Angptl7	0	0	0	0	0	0	0	0	0	0	0	0	2	1	0	0	0	0	2	1	0	0	1
Ank	0	2	5	6	4	3	9	3	4	4	2	1	0	2	3	9	6	2	3	2	3	0	4
Ank1	0	0	0	0	1	0	0	0	0	0	0	0	0	0	2	1	0	0	0	0	0	0	0
Ank2	0	0	0	0	0	0	0	0	0	0	0	0	0	0	0	0	0	0	0	1	0	0	0
Ank3	0	0	0	0	0	0	0	0	0	0	0	0	0	0	0	0	0	0	0	0	0	0	0
Ankfy1	0	0	6	10	6	10	2	9	1	5	3	11	7	2	8	10	8	5	10	1	5	3	9
Ankhd1	2	10	3	7	5	16	6	7	4	4	2	10	9	11	7	9	12	4	4	0	19	1	7
Ankib1	0	5	9	6	6	7	6	6	4	10	1	19	2	5	5	3	17	6	7	5	4	3	10
Ankle1	0	0	0	0	0	0	0	0	0	0	0	0	0	0	0	0	0	0	0	0	0	0	0
Ankle2	0	3	5	2	12	5	1	8	3	4	1	11	1	5	2	8	3	5	6	8	9	2	7
Ankmy1	0	0	0	0	0	1	0	0	0	0	0	0	0	0	0	0	1	0	0	0	0	0	0
Ankmy2	0	4	7	10	11	8	6	14	3	8	0	12	3	1	9	1	16	4	7	1	4	4	9
Ankra2	0	5	16	7	17	19	2	16	10	14	1	17	6	4	24	11	10	8	7	3	9	1	10
Ankrd1	0	0	0	0	0	0	0	0	0	0	0	0	0	0	0	0	0	0	0	0	0	0	0
Ankrd10	0	13	34	35	46	30	21	30	13	33	10	28	14	20	45	32	34	25	24	12	33	11	47
Ankrd11	1	17	41	30	48	38	23	44	12	41	4	60	11	35	49	21	42	17	38	26	19	8	25
Ankrd12	3	18	29	28	45	61	20	51	16	59	17	63	13	27	37	39	56	24	23	17	14	6	45
Ankrd13a	0	0	4	3	12	10	3	2	4	3	0	12	2	1	5	3	6	5	6	3	5	3	8
Ankrd13b	0	0	0	0	2	1	0	0	0	0	0	1	0	1	1	0	0	0	0	0	0	0	1
Ankrd13c	0	3	6	5	3	5	3	6	3	7	0	6	3	6	5	6	11	9	3	0	3	1	3
Ankrd13d	0	3	3	1	2	3	0	5	1	1	0	5	1	0	2	1	2	0	0	0	0	1	2
Ankrd16	0	4	9	11	8	8	1	4	3	9	0	9	1	2	8	2	3	4	6	4	5	3	5
Ankrd17	2	2	12	8	12	9	5	4	3	6	0	12	4	6	7	6	14	3	7	3	7	0	3
Ankrd23	0	0	0	0	0	0	0	0	0	1	0	0	0	0	0	0	0	0	0	0	0	0	1
Ankrd24	0	1	2	2	2	1	0	0	1	3	0	0	0	0	1	0	0	0	0	0	0	0	0
Ankrd26	3	15	13	22	15	28	7	21	4	21	6	18	10	26	21	11	32	9	12	8	10	3	8
Ankrd27	0	0	9	2	11	10	4	16	3	8	5	15	4	7	10	12	12	8	6	5	7	4	12
Ankrd28	0	1	1	2	0	2	0	2	0	2	0	3	2	3	0	0	1	1	0	0	0	1	2
Ankrd29	0	0	0	4	2	0	0	7	1	2	0	2	0	1	2	0	1	1	0	0	1	0	0
Ankrd33b	0	0	0	0	0	0	0	0	0	0	0	0	0	0	0	0	0	0	0	0	0	0	0
Ankrd35	0	0	0	1	1	1	0	0	0	0	0	1	0	0	1	1	0	1	0	0	0	0	0
Ankrd37	0	2	2	6	4	3	0	3	5	8	5	3	6	2	3	0	3	2	6	4	11	1	1
Ankrd39	0	2	7	7	11	6	5	8	1	4	4	7	1	3	6	3	9	3	5	1	2	0	7
Ankrd40	0	1	2	2	6	4	2	3	0	1	0	1	0	1	0	0	0	4	1	1	2	0	1
Ankrd42	0	0	0	0	1	0	0	0	0	0	0	0	0	0	0	0	0	0	0	0	0	0	0
Ankrd44	0	13	30	21	32	31	17	28	16	31	1	38	6	12	32	18	40	7	29	14	16	9	18
Ankrd46	0	1	3	11	12	7	5	10	6	16	1	12	2	6	10	7	7	4	4	2	3	4	5
Ankrd49	1	4	10	4	9	7	9	4	4	14	2	13	4	4	10	4	11	8	6	2	5	1	7
Ankrd50	1	0	1	1	2	5	1	0	1	2	0	0	2	2	1	0	2	0	2	0	0	1	2
Ankrd52	0	0	0	0	1	1	0	1	1	1	0	0	0	0	0	0	0	0	0	0	1	0	1
Ankrd54	1	17	34	25	28	24	8	20	7	26	4	26	9	9	36	26	33	5	16	8	13	7	29
Ankrd55	0	0	0	0	0	0	0	0	0	0	0	0	0	0	0	0	0	0	0	0	0	0	0
Ankrd6	0	0	0	0	0	0	0	0	0	0	0	0	0	0	0	0	0	0	0	0	0	0	0
Ankrd61	0	0	0	0	0	0	0	0	0	0	0	0	0	0	1	0	0	0	0	0	0	0	0
Ankrd63	0	0	0	0	0	0	0	0	0	0	0	0	0	0	0	0	0	0	0	0	0	0	0
Ankrd7	0	0	0	0	0	1	0	0	0	0	0	0	1	0	0	0	1	0	0	0	0	0	0
Ankrd9	0	5	3	2	5	3	3	0	2	1	0	6	2	5	4	5	6	3	5	2	2	1	1
Anks1	0	2	3	0	3	1	2	2	0	2	0	1	2	2	2	1	0	2	0	1	0	0	0
Anks1b	0	0	0	1	0	1	0	0	0	0	0	0	0	0	0	0	0	0	0	0	0	0	0
Anks3	2	4	13	7	18	7	8	8	7	11	2	24	6	9	9	12	17	12	7	4	10	2	21
Anks6	0	0	0	0	0	0	0	0	0	0	0	0	0	0	0	0	0	0	0	0	0	0	0
Ankzf1	0	6	17	6	22	11	3	5	4	9	1	27	3	6	20	4	17	6	7	4	8	3	11
Anln	0	2	0	0	1	0	1	1	0	0	0	0	0	0	0	0	0	0	0	1	0	0	0
Ano10	0	5	6	8	8	11	0	6	5	7	0	9	3	4	11	4	15	2	2	2	5	2	5
Ano6	1	8	15	2	11	5	2	4	5	8	0	15	3	3	9	2	16	6	9	5	6	2	7
Ano8	0	1	0	0	2	2	1	1	1	0	0	1	1	1	0	0	1	2	1	0	0	0	0
Anp32-ps	0	11	37	10	41	36	15	16	9	32	0	65	11	12	37	21	31	13	12	14	11	8	20
Anp32a	2	64	135	62	178	138	57	76	45	97	12	218	36	68	144	110	146	77	70	74	71	23	91
Anp32b	1	27	42	39	72	53	33	31	23	40	5	61	24	27	54	23	77	39	29	20	26	12	47
Anp32b-ps1	0	5	13	10	15	11	7	6	5	6	1	19	6	8	15	3	29	12	8	6	10	3	17
Anp32e	1	31	74	56	104	86	23	54	26	74	4	94	31	37	82	74	119	62	65	26	39	13	81
Anpep	0	0	0	0	0	1	0	0	0	0	0	2	0	0	0	0	1	1	0	0	0	0	0
Antxr2	2	10	8	16	17	15	9	10	2	8	0	21	8	10	13	9	9	7	5	2	10	6	9
Anxa1	0	2	14	6	39	17	0	2	0	2	1	9	1	7	25	9	12	8	12	1	5	3	3
Anxa11	0	0	1	0	0	1	0	0	0	0	0	0	2	0	0	0	0	0	0	1	0	1	0
Anxa11os	0	0	3	0	0	0	0	0	1	2	1	0	0	0	0	1	0	0	0	0	2	0	0
Anxa2	6	59	151	131	200	132	45	60	47	97	31	141	37	57	162	117	160	85	64	46	71	25	110
Anxa3	2	0	0	0	0	0	0	0	0	0	0	1	0	1	0	0	0	0	0	0	0	0	0
Anxa4	0	0	0	2	3	3	2	1	0	11	0	6	1	2	1	2	2	3	4	2	0	0	1
Anxa5	5	21	56	48	75	84	22	37	29	49	8	72	24	30	82	39	55	35	42	20	28	9	40
Anxa6	3	53	115	134	184	166	54	91	58	115	20	203	53	84	175	127	196	110	98	60	72	35	126
Anxa7	1	5	13	25	38	26	17	25	14	43	2	28	9	13	32	25	40	12	24	14	15	4	39
Anxa9	0	0	0	1	0	1	0	0	0	0	0	0	0	0	0	0	0	0	0	0	0	0	1
Aoah	0	0	0	0	1	0	0	0	0	0	0	0	0	0	0	0	0	0	0	0	0	0	0
Aoc2	0	1	1	2	0	1	0	1	0	1	0	1	0	1	1	0	2	0	1	0	0	0	0
Aoc3	0	0	0	0	0	0	0	0	0	0	0	1	0	0	0	0	0	0	0	0	0	0	0
Aox1	0	0	0	0	0	0	0	0	1	0	0	0	0	0	0	0	0	0	0	0	0	0	0
Aox2	0	0	0	0	0	0	0	0	0	0	0	0	0	0	1	0	1	0	0	0	0	0	0
Ap1ar	0	2	9	4	5	9	0	9	1	4	0	11	4	2	5	8	10	4	4	2	1	1	5
Ap1b1	1	9	21	21	37	22	10	19	13	30	5	45	13	18	29	20	27	15	25	10	18	5	13
Ap1g1	0	4	2	4	3	8	7	11	2	6	0	12	1	3	3	2	9	12	5	3	3	0	8
Ap1g2	4	20	36	41	41	38	9	11	9	21	3	60	14	20	42	28	40	17	22	17	17	12	35
Ap1m1	1	20	39	50	81	64	17	27	22	27	9	85	29	40	70	45	74	31	42	29	27	12	55
Ap1m2	0	0	0	0	2	0	0	2	0	0	0	0	0	0	1	0	1	0	1	2	0	4	2
Ap1s1	1	12	21	22	33	30	11	22	12	40	6	33	7	14	35	27	32	27	14	9	18	5	22
Ap1s2	1	10	10	5	11	9	4	6	6	12	1	13	4	2	11	9	14	7	11	3	4	1	8
Ap1s3	0	0	0	1	2	0	1	1	0	1	0	2	2	0	0	0	0	1	1	0	0	1	2
Ap2a1	0	5	22	20	18	21	5	10	9	14	0	30	5	14	15	20	19	16	16	5	9	2	9
Ap2a2	0	4	15	9	13	13	3	9	2	13	1	9	3	4	10	12	12	6	7	7	8	0	10
Ap2b1	0	4	9	7	4	12	0	5	0	12	1	28	3	7	6	10	10	4	4	6	8	2	7
Ap2m1	1	17	42	50	83	70	30	51	26	62	10	66	20	34	60	46	73	39	50	18	32	8	43
Ap2s1	3	27	30	36	86	54	19	50	29	59	8	75	15	44	67	45	68	37	41	13	32	9	44
Ap3b1	1	12	23	18	38	39	21	37	12	22	2	35	11	22	29	26	34	17	24	12	22	5	19
Ap3d1	0	16	21	14	23	15	8	19	4	19	3	28	11	10	22	25	35	10	14	5	8	9	17
Ap3m1	1	3	7	4	7	12	3	8	4	2	0	17	3	5	10	6	14	8	12	4	5	1	10
Ap3m1-ps	0	1	0	0	0	0	0	0	0	1	0	2	1	0	1	0	0	0	0	0	0	0	0
Ap3m2	0	2	4	2	17	13	6	4	6	6	2	15	3	3	11	7	10	7	9	7	1	0	11
Ap3s1	0	7	2	4	6	2	3	6	4	9	1	6	5	3	4	4	8	4	7	4	2	1	11
Ap3s1-ps1	0	0	0	0	0	0	0	1	0	0	0	0	0	0	1	0	0	0	1	0	0	0	0
Ap3s1-ps2	0	0	0	1	0	0	0	1	0	0	0	0	0	0	1	0	0	0	1	0	0	0	0
Ap3s2	0	6	5	5	12	8	4	12	6	6	4	12	6	8	9	9	8	7	12	3	8	0	11
Ap4b1	0	2	6	3	4	9	2	9	5	4	0	5	1	4	7	0	9	1	0	1	2	2	2
Ap4e1	0	2	0	1	0	8	0	2	1	4	1	3	2	1	3	0	2	0	0	4	1	0	1
Ap4m1	0	2	2	0	0	2	1	1	0	3	1	4	1	2	5	2	4	0	0	1	2	0	2
Ap4s1	0	8	20	21	32	20	4	22	10	24	1	37	7	6	15	19	17	12	15	7	5	4	21
Ap5b1	0	0	0	2	0	4	1	3	1	4	0	5	1	1	1	2	2	1	0	1	1	0	4
Ap5m1	0	6	9	12	22	14	5	12	8	13	1	16	3	6	19	7	17	8	18	2	6	5	10
Ap5s1	0	3	9	4	7	12	3	2	0	5	0	7	4	10	7	7	8	2	2	1	2	3	4
Ap5z1	0	2	8	7	9	8	1	4	3	4	2	9	1	4	10	8	10	2	3	2	3	2	5
Apaf1	0	4	3	3	6	6	4	5	5	16	0	6	5	6	3	5	8	7	5	2	5	2	5
Apba1	0	0	0	0	0	0	0	0	0	0	0	0	0	0	0	1	0	0	0	0	0	0	0
Apba3	0	4	3	6	10	10	0	4	3	10	0	10	3	1	13	6	6	2	4	3	3	3	9
Apbb1	2	1	3	7	9	1	3	3	4	14	2	7	2	2	4	1	4	1	1	2	7	0	0
Apbb1ip	1	26	48	63	88	87	38	53	24	38	18	99	46	41	102	48	86	26	49	32	40	17	64
Apbb2	0	0	0	0	1	0	0	0	0	0	0	1	0	0	0	0	0	0	0	0	0	0	0
Apc	0	1	5	7	2	8	3	1	5	5	0	9	1	6	4	4	2	4	4	1	4	0	4
Apc2	0	0	0	0	0	0	0	0	0	0	0	0	0	0	0	0	0	1	0	0	1	0	0
Apcs	0	0	0	1	0	0	0	0	0	0	0	0	0	0	0	0	0	0	0	0	0	0	0
Apeh	1	8	27	26	57	24	11	32	11	23	6	38	13	7	27	22	32	15	10	12	9	7	17
Apex1	1	5	11	9	20	16	5	11	1	3	2	34	10	14	17	22	28	7	16	14	16	7	19
Apex2	0	1	6	1	3	2	3	4	3	7	0	5	4	2	7	3	6	1	4	1	0	2	3
Aph1a	0	2	0	2	4	4	2	1	2	2	0	5	0	1	2	4	1	2	1	0	1	1	2
Aph1b	0	0	0	1	0	0	0	0	2	0	0	3	0	0	1	0	0	1	0	1	1	0	0
Aph1c	0	0	0	0	0	0	0	0	0	0	0	0	1	0	2	0	2	0	1	0	1	0	0
Api5	0	14	24	19	50	36	17	35	16	33	4	42	11	22	31	27	35	20	25	15	17	10	38
Apip	0	1	10	4	16	9	2	3	8	5	1	12	2	1	0	4	9	2	0	1	2	2	7
Aplf	0	2	3	2	3	3	2	0	2	0	0	4	0	0	2	0	0	0	0	0	1	1	1
Apln	0	0	0	0	0	1	0	0	0	1	0	0	0	0	0	0	0	0	0	0	0	0	0
Aplp1	0	1	8	3	1	0	8	8	8	7	2	1	2	1	2	1	9	2	1	1	4	0	3
Aplp2	0	14	38	41	28	27	15	32	14	43	14	32	11	8	33	19	25	10	18	5	21	6	16
Apmap	1	4	13	10	18	2	1	5	5	19	2	9	5	5	7	10	11	9	9	5	3	1	8
Apoa1	1	1	1	1	2	0	0	0	0	3	0	0	0	5	0	1	3	0	0	0	0	2	0
Apoa2	1	1	1	2	1	4	0	0	0	0	0	2	3	0	2	3	6	0	0	0	0	1	1
Apoa5	0	0	0	0	0	0	0	0	0	0	0	0	0	0	0	0	0	0	0	0	0	0	0
Apob	0	0	0	0	0	0	0	0	0	0	1	0	0	0	0	0	0	0	0	0	0	0	0
Apobec1	0	5	3	1	6	7	2	8	1	4	2	9	0	5	4	2	8	4	11	0	2	1	5
Apobec2	0	2	5	0	2	2	0	2	4	8	2	3	0	4	7	1	6	4	0	1	2	0	1
Apobec3	0	32	82	78	90	67	46	60	36	107	18	129	37	58	84	61	81	65	58	37	60	16	90
Apobr	1	5	15	13	25	10	7	4	3	6	1	21	2	7	17	4	13	1	8	4	4	1	6
Apoc1	0	0	3	0	0	0	0	0	1	0	1	2	0	1	2	0	0	0	0	0	0	0	0
Apoc3	0	0	0	1	0	0	0	0	0	0	0	0	0	1	0	2	0	0	0	0	0	0	0
Apoc4	0	0	0	0	1	0	0	0	0	0	1	2	0	0	1	0	0	0	0	0	0	0	1
Apod	0	0	0	0	0	2	0	0	0	0	0	0	1	0	1	2	1	0	2	2	0	0	0
Apoe	1	16	9	14	35	16	11	49	7	8	4	11	3	10	30	19	25	2	3	2	1	1	9
Apof	0	0	0	0	0	0	0	0	0	0	0	0	0	0	0	0	3	0	1	0	0	0	0
Apoh	0	0	0	0	0	1	0	1	0	0	0	0	0	0	0	1	4	0	0	0	0	0	0
Apol10b	0	0	2	1	2	7	1	5	3	7	0	4	0	0	4	1	6	0	3	2	3	0	1
Apol11a	0	0	0	0	0	0	0	0	0	1	0	0	0	0	0	0	0	0	0	0	0	0	0
Apol11b	0	0	0	0	1	1	0	0	0	0	0	0	0	0	0	0	1	1	0	0	0	2	1
Apol6	0	0	1	0	0	0	0	0	0	0	0	0	0	0	0	0	0	0	0	0	0	0	0
Apol7b	0	0	0	0	1	0	0	0	0	0	0	0	0	0	0	0	0	0	0	0	0	0	0
Apol7c	0	0	0	0	0	0	0	0	0	0	0	4	0	0	0	0	1	0	0	0	0	0	1
Apol7e	0	2	2	4	5	5	4	6	5	6	0	7	1	5	1	2	3	1	2	1	1	1	3
Apol8	0	0	0	0	2	0	0	0	0	0	0	0	1	0	0	0	0	1	2	0	0	0	0
Apol9a	0	0	0	0	0	0	0	0	0	0	0	0	0	0	0	0	0	0	0	0	0	0	0
Apol9b	0	1	0	0	0	0	0	5	0	2	0	0	0	0	1	0	0	0	0	0	0	0	0
Apold1	0	0	1	0	0	0	2	0	0	1	0	0	0	0	0	0	0	1	0	0	0	0	0
Apom	0	0	0	1	0	0	0	0	0	0	0	0	0	0	0	0	0	0	0	0	0	0	0
Apon	0	0	0	0	0	0	0	0	0	0	0	1	0	0	0	0	0	0	0	0	0	0	0
Apoo	0	1	1	3	5	3	0	1	0	1	0	3	4	3	2	1	0	1	0	0	1	1	2
Apoo-ps	0	2	2	1	6	3	1	2	1	0	0	1	3	2	5	0	3	2	0	0	1	1	4
Apool	0	6	8	9	15	9	3	6	3	14	3	18	1	1	15	8	8	2	6	2	10	4	10
Apopt1	1	1	6	15	18	19	8	12	6	16	0	17	5	9	15	19	15	11	13	5	6	3	5
App	0	2	0	0	10	3	0	0	0	0	1	0	1	3	1	1	3	1	1	2	0	1	2
Appbp2	1	3	6	12	6	5	4	2	2	4	0	6	2	2	9	6	14	7	9	7	7	2	3
Appbp2os	0	0	0	0	0	0	1	0	0	0	0	0	0	0	0	1	0	0	0	0	1	0	0
Appl1	2	11	24	16	34	28	6	16	11	16	3	25	7	14	23	13	23	16	11	4	9	1	15
Appl2	0	5	4	3	11	7	5	6	2	6	0	5	3	3	6	2	12	1	5	2	5	2	2
Aprt	0	39	54	57	98	59	39	65	44	66	16	103	29	37	71	48	68	45	55	19	49	16	66
Aprt-ps	0	0	0	0	1	0	0	0	1	2	0	0	0	0	0	0	0	0	0	0	0	0	0
Aptx	0	8	10	5	16	11	4	12	8	7	1	7	3	8	7	3	11	4	14	1	6	2	12
Aqp1	0	1	1	0	1	0	0	2	0	0	0	0	0	1	0	0	1	0	0	0	0	0	0
Aqp11	0	0	0	0	1	0	0	0	0	0	0	1	0	0	0	0	0	1	0	1	0	0	0
Aqp3	0	3	3	2	7	5	1	3	0	1	0	10	3	4	16	5	16	5	3	2	6	2	8
Aqp7	0	0	0	0	0	0	0	0	0	0	0	0	0	0	0	0	0	0	0	0	0	0	0
Aqp9	1	4	6	3	34	13	0	1	0	0	0	19	3	2	12	10	9	2	4	1	1	3	5
Aqr	1	13	20	15	23	27	5	17	10	17	4	27	3	14	28	16	29	17	15	11	17	5	21
Ar	0	2	3	9	5	9	1	7	4	12	2	6	5	6	4	5	11	3	8	5	16	1	6
Araf	0	17	26	27	38	32	17	27	10	34	4	36	13	15	37	16	33	20	22	10	9	10	27
Arap1	1	1	8	9	14	14	7	11	10	7	2	11	5	0	10	7	4	5	6	6	12	2	6
Arap2	1	10	19	18	18	19	22	34	25	48	11	38	13	10	12	21	32	31	27	10	26	4	26
Arap3	0	0	0	0	0	0	0	0	0	0	0	1	0	0	1	0	1	0	0	0	0	1	0
Arc	1	1	6	3	2	2	2	0	2	2	0	2	4	5	3	5	6	3	2	0	4	0	4
Arcn1	0	15	19	37	27	27	18	24	11	24	2	63	8	33	32	18	24	19	21	16	17	3	21
Areg	0	1	0	0	11	2	1	1	2	6	0	0	1	1	7	1	1	0	4	3	1	1	1
Arel1	1	3	0	6	6	9	0	7	5	3	2	11	4	2	6	4	4	2	4	1	5	1	7
Arf1	3	54	114	97	180	143	69	104	66	140	14	179	51	76	141	96	159	67	87	55	69	21	101
Arf2	0	1	7	3	5	3	2	1	1	9	1	9	1	2	8	12	8	1	6	4	5	1	10
Arf3	0	4	6	7	9	8	2	8	6	8	1	13	3	4	4	6	11	5	9	4	6	4	8
Arf4	0	22	47	42	89	61	28	63	28	66	11	57	34	33	52	64	77	40	39	39	41	14	54
Arf4os	0	0	0	0	0	0	0	0	0	0	0	0	0	0	0	0	0	0	0	0	0	0	0
Arf5	3	19	46	29	61	56	22	39	27	56	10	68	15	26	43	24	69	31	48	19	30	10	46
Arf6	1	7	14	15	14	8	3	8	10	13	0	10	2	5	21	9	10	5	8	4	7	6	12
Arfgap1	0	8	16	12	23	26	6	14	5	20	3	29	7	6	17	17	19	12	15	4	6	6	15
Arfgap2	1	7	24	34	42	28	6	19	13	30	7	25	7	13	22	20	32	12	20	12	11	5	20
Arfgap3	1	2	7	2	2	4	2	3	1	7	0	8	1	2	5	3	5	0	3	0	2	1	4
Arfgef1	0	1	9	6	9	17	6	13	7	6	4	9	4	7	8	8	13	6	14	4	7	3	7
Arfgef2	0	3	1	2	4	4	2	1	2	1	1	3	0	3	4	3	2	3	2	1	1	0	0
Arfip1	1	5	11	13	23	11	3	13	5	16	3	17	9	7	15	9	16	6	18	6	8	3	18
Arfip2	0	2	4	3	3	6	4	2	1	3	3	10	0	3	5	8	10	5	3	1	6	0	5
Arfrp1	2	22	35	31	66	31	21	32	25	56	5	65	9	35	48	36	41	24	41	20	36	6	35
Arg1	0	0	1	0	0	0	0	0	0	0	0	0	0	0	1	0	0	0	0	0	0	0	0
Arglu1	1	16	23	16	24	31	20	17	19	36	3	60	15	14	28	22	40	22	19	8	20	3	28
Arhgap1	2	15	30	20	44	37	15	27	17	32	5	58	9	11	35	32	47	18	21	4	13	6	32
Arhgap10	0	5	11	18	8	18	11	23	7	29	5	17	5	6	14	10	15	4	15	3	4	2	7
Arhgap11a	0	0	1	0	3	1	4	2	4	3	0	2	3	4	2	1	1	0	2	4	1	0	2
Arhgap12	0	3	6	6	12	9	2	9	1	5	2	2	5	6	5	3	6	2	6	5	3	3	7
Arhgap15	4	29	44	55	98	101	23	33	14	44	12	122	22	64	80	54	75	38	49	31	50	8	53
Arhgap17	1	2	9	5	21	9	6	12	4	17	1	18	7	11	16	6	12	12	5	4	8	2	12
Arhgap18	1	7	11	17	18	18	2	3	1	7	0	21	5	4	7	9	15	12	4	3	6	0	10
Arhgap19	0	0	1	0	1	1	2	1	0	0	0	2	0	0	1	1	0	0	0	0	0	0	0
Arhgap21	0	0	0	2	0	0	0	0	0	0	0	4	1	2	1	0	1	1	0	0	0	1	0
Arhgap22	0	0	0	0	0	0	0	0	0	0	0	2	0	0	0	0	0	0	0	0	0	0	1
Arhgap24	0	0	0	0	0	0	0	1	0	0	0	0	0	2	0	0	0	0	1	0	0	1	0
Arhgap25	0	27	35	31	53	45	16	31	21	36	12	63	12	30	67	34	57	24	28	14	35	6	25
Arhgap26	0	14	28	17	20	29	1	15	3	9	2	40	6	26	15	11	30	10	13	13	14	0	19
Arhgap27	0	9	7	11	23	18	6	15	4	10	3	19	5	8	26	8	28	11	15	5	10	2	14
Arhgap27os1	0	0	0	0	0	0	0	0	0	0	0	0	0	0	0	0	0	0	0	0	0	0	0
Arhgap27os2	0	0	0	0	0	1	1	0	0	0	0	1	0	0	0	1	0	1	1	0	1	1	2
Arhgap27os3	2	6	2	1	13	11	5	5	3	11	0	15	2	6	11	8	11	4	6	10	2	0	7
Arhgap28	0	0	0	0	0	0	0	0	0	0	0	0	0	0	0	0	0	0	0	0	0	0	0
Arhgap29	0	1	0	0	0	0	0	0	0	0	0	0	0	1	0	1	1	0	1	0	0	0	0
Arhgap30	5	40	85	68	104	70	41	78	39	71	15	130	25	34	79	53	85	57	55	40	40	12	64
Arhgap31	1	11	14	12	14	15	17	12	7	26	1	8	9	10	21	10	15	11	9	11	14	1	10
Arhgap32	0	0	0	0	0	0	0	0	0	0	0	0	0	0	0	0	0	0	0	0	1	0	1
Arhgap33	0	0	0	0	3	0	1	0	0	0	0	2	0	0	0	1	0	0	0	0	1	0	0
Arhgap35	0	0	2	3	1	2	1	2	0	1	0	1	0	3	1	0	0	1	1	1	2	0	0
Arhgap36	0	0	0	0	0	0	0	0	0	0	0	0	0	0	0	0	0	0	0	0	0	0	0
Arhgap39	0	1	2	1	1	1	0	1	2	5	1	3	0	1	2	1	3	3	0	2	0	0	1
Arhgap4	2	13	47	38	57	45	20	27	24	36	7	91	17	25	61	34	55	22	35	13	33	9	38
Arhgap42	0	0	0	0	0	0	0	0	0	0	0	0	0	0	0	0	0	0	0	0	0	0	0
Arhgap45	9	118	245	216	305	323	121	183	100	203	31	465	113	159	270	193	302	167	170	98	167	48	201
Arhgap5	0	3	6	4	8	8	3	0	2	0	1	9	9	3	10	3	13	7	7	4	6	2	8
Arhgap6	0	1	0	0	0	1	0	0	0	0	0	0	0	0	0	0	0	0	0	0	0	1	0
Arhgap8	0	0	0	0	0	0	0	0	0	0	0	0	0	0	0	0	0	0	0	0	0	0	0
Arhgap9	6	75	129	96	114	125	87	145	75	100	29	212	55	63	120	88	170	71	56	36	57	28	78
Arhgdia	11	113	235	247	367	301	105	235	136	263	43	367	96	137	328	226	315	159	205	95	143	66	240
Arhgdib	30	311	603	589	1150	837	272	480	300	599	76	1074	311	466	924	647	959	497	550	310	439	166	704
Arhgdig	0	0	0	0	0	0	0	0	0	0	0	0	0	0	0	0	0	0	0	0	0	0	0
Arhgef1	5	26	51	58	71	54	28	40	20	31	3	99	25	35	56	36	75	35	31	23	27	11	39
Arhgef10	0	1	2	2	1	2	0	3	0	1	0	0	1	1	1	4	4	4	5	2	3	1	2
Arhgef10l	0	0	0	0	0	1	0	0	0	0	0	0	2	0	0	0	1	0	1	1	2	0	0
Arhgef11	0	1	0	0	1	1	0	0	0	0	0	1	0	0	0	0	1	1	0	0	0	0	1
Arhgef12	0	0	7	1	2	3	3	2	1	0	0	4	2	4	3	2	6	1	0	0	0	2	0
Arhgef16	0	0	0	0	0	0	0	0	0	1	1	0	0	0	0	0	0	0	0	0	0	0	0
Arhgef18	0	8	15	17	19	23	7	4	4	5	1	38	15	15	20	13	28	13	13	11	10	6	13
Arhgef2	1	14	26	15	30	36	11	17	9	22	6	26	9	18	38	22	29	23	21	14	16	7	21
Arhgef25	0	0	0	0	0	0	0	0	1	0	0	0	0	0	0	0	0	0	0	0	0	0	0
Arhgef3	0	24	31	38	48	59	29	54	30	38	7	58	21	30	59	37	55	41	27	28	34	11	48
Arhgef33	0	0	0	0	0	0	1	0	0	0	0	0	0	0	0	0	0	0	0	0	1	0	0
Arhgef39	0	0	1	0	3	2	0	0	0	1	0	2	0	0	1	1	2	0	0	0	0	0	0
Arhgef4	0	0	3	7	4	7	3	5	1	4	0	8	2	3	4	0	3	0	3	4	1	2	2
Arhgef40	0	0	0	0	0	0	0	0	0	0	0	0	0	0	0	0	0	0	0	0	0	0	0
Arhgef5	0	0	0	2	0	1	4	2	0	4	1	3	1	0	0	1	0	0	2	4	1	1	0
Arhgef6	0	7	20	27	28	24	11	23	17	26	4	19	4	14	22	14	33	14	18	9	10	3	16
Arhgef7	1	7	12	14	14	13	11	6	6	16	1	16	8	6	16	16	10	7	7	5	9	1	7
Arhgef9	0	0	0	0	0	0	0	0	0	0	0	1	0	0	0	0	0	0	0	1	0	0	0
Arid1a	0	8	17	9	15	14	8	19	4	10	2	27	5	12	10	8	12	5	13	5	10	3	12
Arid1b	0	2	3	0	4	1	1	1	3	0	0	5	1	5	3	3	2	3	6	4	2	2	3
Arid2	0	2	4	9	6	5	3	3	2	1	0	10	0	1	3	2	3	0	4	4	5	0	7
Arid3a	0	0	0	2	1	3	0	4	0	1	0	0	0	1	3	2	6	1	2	2	1	0	1
Arid3b	1	5	4	4	16	11	7	3	4	14	5	24	5	3	8	8	8	6	5	3	10	0	13
Arid3c	0	0	0	0	0	0	0	0	0	0	0	0	0	0	0	0	0	0	1	0	0	0	0
Arid4a	3	28	48	40	58	78	25	45	26	39	17	98	30	52	66	44	75	47	36	35	37	16	49
Arid4b	0	34	52	33	63	69	27	42	28	47	14	76	32	30	69	34	64	34	39	25	39	18	43
Arid5a	3	33	39	35	79	63	39	62	10	62	8	48	44	32	62	41	55	36	42	27	43	12	76
Arid5b	0	4	21	11	11	11	10	18	5	16	2	13	6	7	8	8	16	7	5	6	8	5	11
Arih1	0	4	8	1	5	5	7	6	1	4	2	14	4	4	12	6	13	4	3	3	8	3	7
Arih2	0	9	19	15	26	20	6	11	11	24	2	25	12	15	23	17	29	9	20	10	18	7	25
Arl1	2	12	23	30	41	26	17	18	15	31	7	26	15	17	28	21	37	16	24	16	11	10	28
Arl10	0	0	0	0	0	1	0	0	1	0	0	0	0	1	0	0	0	0	0	0	0	0	0
Arl11	0	0	0	0	0	1	0	0	0	0	0	0	0	0	0	0	0	0	0	0	1	0	0
Arl13b	1	5	15	12	18	18	11	12	9	16	0	23	8	12	24	15	23	9	8	7	10	3	11
Arl14ep	0	1	8	2	5	3	0	4	3	10	1	6	4	6	9	2	6	6	5	3	7	0	10
Arl15	0	1	1	0	2	1	1	2	0	0	0	4	0	0	0	1	0	0	0	1	2	0	1
Arl16	0	3	7	6	12	7	0	7	2	4	0	8	4	8	7	5	10	3	6	1	5	1	9
Arl2	1	10	19	11	17	11	8	10	4	6	4	23	6	14	16	12	22	6	18	4	3	4	21
Arl2bp	1	10	25	24	32	32	10	22	11	5	4	37	7	25	25	27	30	20	11	10	18	5	23
Arl3	0	5	10	20	13	25	8	8	3	17	3	32	7	15	20	16	25	10	9	6	19	3	9
Arl4a	0	17	28	38	49	47	14	32	25	33	6	31	16	21	49	31	42	30	20	19	12	5	33
Arl4aos	0	0	1	0	0	0	0	0	0	0	0	0	0	0	0	0	0	0	0	0	0	0	0
Arl4c	0	21	55	54	69	54	10	16	15	31	5	155	27	51	70	46	83	29	23	22	33	10	41
Arl4d	0	1	3	2	7	5	0	3	0	1	0	12	1	3	5	3	7	3	2	0	5	0	0
Arl5a	0	1	0	4	4	2	1	9	6	5	0	3	4	6	2	5	5	2	6	1	2	0	3
Arl5b	1	1	5	4	4	12	2	5	1	8	1	8	4	3	4	4	12	2	9	2	3	0	4
Arl5c	0	14	11	16	25	28	9	11	6	5	4	53	19	30	27	19	35	24	23	13	22	2	31
Arl6	0	2	1	0	4	2	0	0	0	0	0	0	0	0	0	1	1	0	0	1	0	1	1
Arl6ip1	9	61	127	112	159	111	94	157	109	209	29	178	56	81	151	100	137	98	94	70	84	32	107
Arl6ip4	4	23	30	31	44	38	17	31	12	24	6	62	10	16	48	30	31	18	27	26	20	9	35
Arl6ip5	1	47	95	90	150	112	27	76	41	102	10	140	41	56	124	86	126	61	63	42	56	22	122
Arl6ip6	1	3	11	8	10	14	5	7	5	2	0	7	5	6	6	9	7	5	4	7	6	4	7
Arl8a	0	2	3	6	3	6	3	6	3	2	2	4	1	3	4	7	3	6	3	2	2	0	3
Arl8b	0	1	1	4	6	7	1	3	2	4	1	7	1	1	7	3	7	3	3	2	1	1	5
Arl9	0	0	0	0	0	0	0	0	0	0	0	0	0	0	0	0	0	0	0	0	0	0	0
Armc1	0	5	21	15	8	12	6	6	1	21	1	14	4	6	20	9	15	7	12	6	6	4	8
Armc10	1	11	30	19	34	38	19	23	10	16	0	43	7	13	30	30	31	9	20	17	15	8	23
Armc2	0	0	0	0	1	0	0	0	0	1	0	1	0	0	0	0	0	0	1	0	0	0	0
Armc3	0	3	6	2	1	5	6	13	6	6	3	6	4	2	2	3	3	5	7	1	3	3	5
Armc5	2	4	5	8	15	5	5	6	3	19	0	10	5	6	10	8	16	7	9	5	8	2	13
Armc6	0	2	3	5	4	1	1	2	0	0	1	10	0	3	8	2	10	2	1	2	1	2	2
Armc7	0	22	50	44	73	39	22	38	14	37	9	78	9	34	64	39	73	13	23	23	24	19	23
Armc8	0	5	13	13	17	14	11	12	3	11	1	15	6	4	7	13	8	6	5	7	7	2	8
Armc9	0	0	0	1	0	2	1	0	1	1	0	2	0	1	4	0	1	0	1	0	0	0	0
Armcx1	0	0	0	0	0	0	0	0	0	0	0	0	0	0	0	0	0	0	0	1	0	0	0
Armcx2	0	0	3	1	4	3	1	6	0	2	0	4	0	2	4	4	1	2	2	1	1	0	2
Armcx3	0	1	1	1	1	1	1	2	0	1	0	4	0	1	3	1	4	0	2	0	1	1	1
Armcx4	0	0	0	0	1	1	0	2	0	0	0	2	0	1	0	0	0	0	1	0	1	0	0
Armcx5	0	3	11	4	9	7	7	6	2	9	1	8	5	7	14	3	11	6	7	0	3	3	9
Armcx6	0	0	1	0	0	0	0	0	0	0	0	0	0	0	1	0	3	0	1	0	1	0	0
Armh2	0	0	0	0	0	0	0	0	0	0	0	0	0	0	0	0	0	0	0	0	0	0	0
Armh3	0	1	1	2	2	1	0	3	1	1	0	1	0	0	2	2	0	0	1	2	2	0	0
Armt1	0	3	3	3	8	6	1	3	3	5	2	7	3	5	5	4	5	7	5	2	3	1	3
Arnt	0	3	4	12	7	9	3	3	2	7	1	10	4	8	6	3	8	4	10	10	7	2	5
Arnt2	0	2	2	1	0	0	2	4	6	13	0	0	0	0	0	1	0	1	0	0	4	0	0
Arntl	0	4	6	4	6	10	4	5	1	4	0	10	4	2	12	5	2	5	2	2	1	2	6
Arpc1a	1	10	15	17	23	18	14	24	13	22	6	22	13	7	26	12	20	15	15	10	7	2	20
Arpc1b	15	153	370	344	505	413	186	345	195	424	55	556	139	246	381	309	456	305	305	144	227	109	322
Arpc2	19	223	399	366	578	468	219	356	256	563	64	568	132	248	537	382	588	300	359	201	328	105	447
Arpc3	3	68	93	96	145	140	45	90	53	128	20	135	53	60	122	95	167	91	91	50	70	27	122
Arpc4	4	40	66	70	111	91	46	66	42	94	20	110	34	42	85	58	102	57	48	24	65	16	87
Arpc5	5	84	137	141	228	187	90	163	93	193	27	239	65	89	228	154	219	135	144	79	113	53	190
Arpc5l	2	42	69	52	92	83	16	56	28	42	10	126	25	29	79	46	84	45	43	27	34	12	65
Arpin	0	1	0	0	0	0	0	0	0	0	0	0	0	0	0	0	0	0	0	0	0	0	0
Arpp19	7	83	119	135	213	151	74	142	69	155	25	178	60	81	171	136	160	106	123	61	100	39	133
Arrb1	0	0	2	3	2	0	1	0	0	0	0	5	1	0	4	2	3	0	0	0	1	0	1
Arrb2	5	56	86	89	143	97	60	100	39	96	13	132	37	51	133	67	110	54	56	37	49	18	70
Arrdc1	2	16	29	32	59	47	7	30	16	29	5	57	20	33	42	43	69	26	26	20	33	10	34
Arrdc2	0	5	5	5	9	7	3	1	3	7	0	2	0	3	10	5	4	2	5	1	5	2	7
Arrdc3	0	4	23	13	12	38	11	9	10	15	3	15	2	0	5	8	9	5	7	5	10	2	2
Arrdc4	1	3	1	0	2	0	0	1	1	2	0	4	2	3	5	1	4	0	2	2	3	0	0
Arsa	1	0	4	3	10	5	5	2	1	2	0	8	1	3	4	7	4	3	4	1	2	1	2
Arsb	0	10	14	11	20	14	7	32	11	23	4	23	6	4	11	4	16	15	15	7	9	2	23
Arsg	0	0	0	0	0	0	0	0	0	0	0	0	0	0	0	0	0	0	0	0	0	0	0
Arsk	0	2	1	2	2	1	0	4	2	2	0	5	1	2	5	6	3	0	1	0	0	2	1
Art1	0	0	0	0	0	0	0	0	0	0	0	0	0	0	1	0	0	0	0	0	0	0	0
Art2a-ps	0	1	1	0	1	0	1	6	1	2	0	1	0	1	0	0	0	0	0	0	0	1	0
Art2b	0	10	20	14	19	17	11	25	22	25	3	20	3	8	16	11	18	6	7	4	10	3	24
Art3	0	1	2	1	1	1	0	3	0	3	0	2	1	2	0	2	2	0	0	0	1	1	1
Art4	0	0	0	1	4	0	0	0	0	1	0	2	0	4	0	2	1	0	0	0	0	0	3
Art5	0	0	0	0	0	0	0	0	0	0	0	0	0	0	0	0	0	0	1	0	0	0	0
Arv1	0	2	2	3	7	4	1	1	0	2	0	5	1	3	3	2	5	5	2	3	1	1	4
Arvcf	0	0	0	0	0	0	1	0	0	1	0	0	0	0	0	0	0	0	0	0	0	0	0
Arxes1	0	0	0	0	0	0	0	0	0	0	0	0	0	0	0	0	0	0	0	0	0	0	0
Arxes2	0	0	0	0	0	1	0	2	1	0	0	0	0	0	0	0	0	0	0	0	1	0	0
As3mt	1	3	9	10	16	14	0	6	1	6	1	10	7	5	8	13	11	3	7	3	8	3	10
Asah1	1	8	11	7	11	15	11	12	3	18	0	19	3	15	21	14	15	16	18	8	7	5	14
Asah2	0	0	0	0	0	0	0	0	0	2	0	0	0	0	0	0	0	0	1	0	1	0	0
Asap1	1	13	18	11	18	26	11	17	5	9	4	32	18	20	18	14	24	10	19	6	14	5	18
Asap2	0	1	0	5	2	1	3	6	3	4	2	3	1	5	1	4	5	1	1	1	4	1	3
Asap3	0	0	0	0	1	0	0	0	0	0	0	0	0	0	0	0	0	0	0	0	0	0	0
Asb1	0	0	1	3	5	4	0	2	0	1	0	1	0	1	3	1	5	0	1	0	2	0	1
Asb11	0	0	0	0	0	0	0	0	0	0	0	0	0	0	0	0	0	0	0	0	0	0	0
Asb13	1	5	7	10	29	20	8	9	4	15	1	16	6	8	11	17	13	10	11	4	8	3	14
Asb14	0	0	1	0	0	0	0	0	0	0	0	0	0	0	0	0	0	0	0	0	0	0	0
Asb15	0	0	0	0	1	0	0	0	0	1	0	0	0	0	0	0	0	0	0	0	0	0	0
Asb2	0	2	12	19	4	4	7	11	4	14	3	10	1	2	5	6	8	0	2	3	0	0	2
Asb3	0	2	5	6	13	12	5	9	3	10	2	14	4	11	13	12	5	7	11	7	7	2	14
Asb5	0	0	0	0	0	0	0	0	0	0	0	0	0	0	0	0	0	0	0	0	0	0	0
Asb6	2	8	33	26	27	22	10	24	8	15	2	28	10	11	26	16	34	17	13	15	25	4	23
Asb7	0	1	4	2	5	3	0	1	0	1	0	2	1	0	2	3	4	2	0	4	1	0	1
Asb8	0	1	11	7	11	8	7	7	4	4	0	24	3	5	6	5	13	6	2	3	7	2	9
Ascc1	3	23	42	27	41	31	11	25	14	24	4	50	19	33	42	33	50	24	25	18	15	6	25
Ascc2	0	3	11	4	6	11	5	11	1	8	1	12	4	2	8	6	9	2	5	5	6	3	8
Ascc3	1	6	28	8	14	26	6	26	7	14	2	29	4	11	14	13	30	13	22	8	20	1	15
Ascl2	0	0	0	0	0	0	0	0	0	0	0	0	0	0	0	0	0	0	0	0	0	0	0
Ascl3	0	0	1	0	0	0	0	0	0	0	0	0	0	1	0	0	0	0	0	0	0	0	0
Ascl4	0	0	0	0	0	0	0	0	0	0	0	0	0	0	0	0	0	0	0	0	0	0	0
Asf1a	0	4	5	8	13	14	4	3	5	1	0	13	3	9	15	4	13	5	7	6	5	2	8
Asf1b	2	3	4	3	9	6	3	7	3	11	0	6	1	4	7	9	9	2	4	4	0	1	6
Ash1l	2	20	28	29	40	45	12	17	8	34	5	42	11	12	40	21	56	17	20	17	18	6	40
Ash2l	0	2	12	2	10	8	8	3	0	4	0	15	1	5	4	4	13	6	5	3	4	1	7
Asic1	0	0	0	0	0	0	0	0	0	0	0	0	0	0	0	0	0	0	0	0	0	0	0
Asl	0	2	4	7	11	2	3	5	3	8	0	9	1	3	5	5	3	4	4	3	2	1	6
Asna1	0	9	13	16	17	13	3	15	5	15	1	13	6	6	11	9	11	10	13	5	11	3	15
Asns	0	1	2	2	1	1	1	1	1	5	0	2	0	2	0	0	2	1	1	2	0	2	2
Asnsd1	2	5	15	14	30	22	6	16	11	22	3	17	9	13	25	14	19	12	8	5	7	8	8
Asph	0	0	0	0	0	1	1	0	1	0	0	0	0	1	3	1	2	1	0	0	0	1	0
Asphd2	0	0	0	0	0	0	0	0	0	0	0	0	0	0	0	0	0	0	0	0	0	0	1
Aspm	0	0	0	1	0	1	0	0	2	0	0	0	0	0	0	1	2	0	0	0	1	0	3
Aspn	0	0	0	0	0	0	0	0	0	0	0	0	0	0	0	0	0	0	0	0	0	0	0
Asprv1	0	0	0	0	0	1	0	0	0	0	0	1	0	0	3	0	1	0	0	0	0	0	0
Aspscr1	0	3	6	7	7	5	6	7	0	9	1	9	2	6	10	7	15	6	6	2	6	1	5
Asrgl1	0	13	15	16	23	18	6	16	17	20	7	33	10	15	27	19	27	13	19	11	10	4	22
Ass1	1	7	12	17	31	23	1	3	1	2	0	39	3	9	21	17	19	8	5	5	6	3	9
Aste1	0	2	4	4	8	6	4	1	2	11	2	11	1	3	9	1	11	12	1	4	7	1	5
Astl	0	0	0	0	0	1	0	1	0	0	0	0	0	0	0	0	0	0	0	0	0	0	0
Asxl1	0	1	3	6	7	12	3	7	3	5	3	9	3	7	6	6	10	3	9	4	5	0	6
Asxl2	1	17	19	26	28	33	33	31	17	18	2	46	13	21	22	19	30	19	14	16	29	10	24
Atad1	0	6	6	14	14	10	6	14	9	33	3	13	9	12	9	10	21	6	8	9	17	0	8
Atad2	0	6	13	8	16	19	3	24	11	18	3	21	9	14	21	10	15	11	16	12	8	5	9
Atad2b	0	9	12	13	16	19	3	6	8	25	1	22	4	6	14	17	27	12	11	4	16	3	13
Atad3a	0	4	12	2	16	10	5	14	7	8	4	19	6	7	9	11	18	8	12	4	12	3	10
Atad3aos	0	2	0	0	1	1	0	0	0	0	0	2	0	0	4	0	2	0	1	0	0	0	0
Atad5	0	0	4	5	0	3	1	3	2	0	2	6	2	2	2	1	3	1	2	2	1	0	0
Atat1	0	2	0	0	0	1	1	0	0	2	1	1	1	1	1	0	3	1	1	2	2	0	0
Atcay	0	0	1	0	3	1	1	4	1	2	0	1	0	1	0	2	1	0	0	0	5	1	0
Atcayos	0	0	1	0	0	2	0	5	1	4	1	2	0	0	1	0	0	1	1	1	0	0	2
Ate1	5	13	20	27	24	26	17	24	13	22	1	44	10	14	36	23	35	17	18	9	22	3	21
Atf1	1	5	11	15	17	11	8	13	5	9	1	15	2	8	10	5	14	6	6	8	6	2	4
Atf1-ps	0	0	0	0	0	0	0	1	0	0	0	0	1	0	0	0	2	0	0	0	0	0	0
Atf2	0	6	6	8	18	7	5	8	7	15	2	14	7	7	15	6	10	9	9	6	9	1	12
Atf3	0	0	0	2	0	1	0	1	0	0	0	0	2	1	0	1	1	0	1	2	0	1	1
Atf4	8	65	112	111	135	112	53	86	40	83	18	78	80	79	123	82	150	74	70	39	76	25	91
Atf5	0	1	2	0	1	2	2	1	2	1	0	3	0	1	1	2	3	1	0	2	1	0	4
Atf6	0	1	7	5	13	8	4	1	4	17	4	5	4	4	8	5	6	10	8	2	3	0	8
Atf6b	1	11	16	32	24	30	12	29	8	35	2	30	9	14	30	25	24	18	26	9	22	6	27
Atf7	1	1	7	6	7	10	4	14	2	8	1	23	1	9	5	10	11	5	7	4	6	2	13
Atf7ip	0	19	18	17	28	42	22	28	21	50	5	53	17	30	28	19	37	24	31	20	23	8	28
Atg10	0	6	3	0	6	7	2	4	0	4	0	6	1	2	3	1	7	4	3	2	2	2	4
Atg101	1	27	25	41	53	51	11	31	26	47	5	32	18	26	42	29	61	28	47	17	34	7	47
Atg12	1	9	10	13	21	19	8	19	10	16	4	23	9	15	21	12	12	6	14	12	9	3	12
Atg13	2	8	17	16	11	10	5	10	1	9	5	16	4	10	6	14	15	9	9	2	8	2	19
Atg14	0	5	8	5	7	6	2	6	7	6	2	5	1	5	8	8	11	3	3	5	4	1	8
Atg16l1	1	1	12	6	16	16	4	11	5	8	2	14	5	4	8	6	13	10	10	4	5	1	9
Atg16l2	2	7	23	8	17	10	4	18	7	13	2	24	9	11	17	12	15	10	10	6	9	4	13
Atg2a	0	12	22	23	24	46	10	20	6	19	3	16	20	13	24	19	33	11	15	20	20	7	18
Atg2b	0	1	2	4	4	9	0	1	0	0	0	12	2	1	0	4	3	0	1	1	2	2	6
Atg3	1	15	16	13	26	33	12	19	4	28	6	32	9	8	20	22	17	9	17	7	10	2	14
Atg4a	0	2	10	6	13	5	3	3	4	10	0	12	3	5	9	7	7	10	4	3	3	0	10
Atg4a-ps	1	0	4	1	3	2	0	1	1	2	0	1	0	1	0	3	0	0	1	0	0	0	3
Atg4b	1	8	14	15	30	20	6	19	7	23	2	25	6	9	20	14	18	15	6	2	17	5	19
Atg4c	0	0	0	0	0	0	0	0	0	0	1	0	0	0	0	1	1	0	0	0	0	0	1
Atg4d	0	10	27	37	43	39	9	16	10	26	6	21	12	17	31	22	38	24	20	7	21	2	21
Atg5	0	11	24	18	27	21	15	18	10	27	3	24	5	8	31	14	33	13	14	13	9	4	12
Atg7	1	4	13	4	18	12	5	9	5	7	1	11	8	1	11	11	11	7	5	5	3	3	7
Atg9a	0	0	0	1	1	1	1	0	1	0	1	1	0	2	0	0	4	0	0	2	0	1	1
Atg9b	0	0	1	0	0	0	0	0	0	0	0	1	0	0	1	0	0	0	0	0	0	0	0
Atic	2	7	22	11	28	26	6	8	9	12	0	28	6	16	21	15	30	5	12	2	12	4	25
Atl1	0	0	0	0	0	0	0	0	0	0	1	0	0	0	0	0	0	0	0	0	0	0	1
Atl2	2	5	4	3	7	5	7	5	1	3	1	11	5	4	7	2	0	2	4	4	6	5	6
Atl3	1	1	9	3	5	4	3	4	2	4	0	5	2	4	7	6	7	1	2	4	2	0	5
Atm	0	5	6	7	4	9	3	5	2	6	0	12	2	6	8	5	13	11	11	6	4	5	6
Atmin	0	4	7	5	5	1	2	8	0	6	1	0	1	1	5	0	3	2	1	0	3	0	3
Atn1	0	1	3	3	2	1	0	0	2	1	0	2	4	1	3	1	6	0	3	4	1	0	2
Atox1	1	43	64	69	109	111	49	70	38	97	15	128	27	52	91	75	115	64	59	31	54	16	86
Atp10a	0	1	2	3	4	5	1	1	1	4	0	2	1	1	5	0	0	4	3	2	2	0	2
Atp10d	0	11	19	21	29	37	10	10	4	22	2	43	16	14	40	13	45	11	28	12	18	3	23
Atp11a	0	0	2	1	0	1	1	0	0	1	0	4	0	0	0	0	2	2	0	0	0	3	1
Atp11b	1	35	39	39	77	58	13	28	16	20	0	107	28	40	70	35	73	39	48	24	43	11	52
Atp11c	0	0	5	4	1	1	0	2	1	4	1	2	1	3	7	1	3	1	1	1	3	0	3
Atp13a1	0	7	10	22	23	29	9	17	4	19	1	27	11	11	22	10	20	14	18	7	11	6	19
Atp13a2	0	2	4	8	1	6	0	1	1	0	1	7	1	5	3	5	2	4	3	0	2	1	5
Atp13a3	1	3	2	0	0	4	0	3	2	2	0	3	2	1	3	3	1	3	1	1	0	0	1
Atp1a1	0	6	17	12	15	24	11	6	5	8	3	20	3	14	20	19	19	16	20	11	10	5	16
Atp1a2	0	0	0	0	0	0	0	0	1	0	0	0	0	0	0	0	0	0	0	0	0	0	0
Atp1a3	0	0	1	0	0	1	0	0	0	0	0	1	2	0	0	2	3	2	1	0	0	0	3
Atp1b1	2	1	1	2	3	8	1	0	0	0	0	5	7	8	9	8	18	10	17	6	10	5	15
Atp1b2	0	0	0	0	0	0	0	0	0	0	0	0	0	0	0	0	0	0	0	0	0	0	0
Atp1b3	8	74	130	131	237	213	37	76	50	94	18	248	102	128	260	163	273	111	137	92	135	33	189
Atp23	2	1	4	3	4	2	2	1	1	3	0	3	2	1	5	6	11	1	2	1	1	0	6
Atp2a1	0	0	0	0	0	5	0	1	0	0	0	1	2	1	5	5	8	9	10	1	2	1	9
Atp2a2	0	0	2	1	8	1	3	4	0	4	0	5	1	3	2	1	3	1	6	1	6	1	0
Atp2a3	3	26	48	50	48	55	17	44	12	36	8	59	11	19	51	34	48	16	33	16	26	10	40
Atp2b1	5	36	79	67	144	136	8	48	25	44	8	113	46	69	124	62	110	51	60	57	71	19	74
Atp2b2	0	0	0	0	1	0	0	1	0	1	0	0	0	0	0	0	1	0	0	0	0	0	1
Atp2b4	1	4	20	19	17	14	7	25	7	15	3	17	2	7	12	7	16	5	4	9	9	2	7
Atp2c1	0	5	6	6	8	17	2	11	6	6	0	15	1	5	4	10	7	5	9	5	4	2	12
Atp4a	0	0	0	0	0	0	0	0	0	0	0	0	0	0	0	1	0	0	0	0	0	0	0
Atp5a1	9	65	151	152	279	219	74	141	67	155	26	259	84	103	237	139	245	119	126	84	98	38	187
Atp5b	4	118	226	221	434	299	123	232	99	219	40	320	101	160	342	204	346	177	223	137	163	55	250
Atp5c1	7	61	121	109	216	133	71	122	71	146	14	173	52	84	160	114	209	95	129	80	90	44	136
Atp5c1-ps	1	10	32	27	43	36	14	20	18	34	3	44	15	25	28	29	61	25	27	15	24	11	33
Atp5d	9	145	282	255	443	281	155	318	142	354	57	386	116	179	336	244	353	223	256	105	198	80	322
Atp5e	9	99	139	147	284	199	88	161	101	213	26	268	65	91	174	152	250	138	130	78	126	45	159
Atp5f1	6	47	93	115	191	152	77	131	51	125	25	213	51	87	164	108	168	92	124	57	77	37	127
Atp5g1	2	28	57	62	121	74	28	56	30	88	12	108	27	40	65	72	95	53	58	37	47	12	63
Atp5g2	0	1	2	4	6	3	0	3	3	2	0	5	1	2	5	3	5	3	3	2	0	0	1
Atp5g3	5	74	122	117	217	131	74	107	64	182	28	199	57	72	127	86	173	100	113	57	89	31	141
Atp5h	14	136	315	242	377	302	129	195	125	209	48	347	101	180	273	233	373	175	178	122	199	65	231
Atp5j	8	82	170	162	258	193	91	184	82	231	39	232	54	92	182	141	215	113	152	74	119	33	175
Atp5j2	7	66	161	151	252	173	77	170	104	191	23	252	69	94	181	146	182	116	123	68	93	29	150
Atp5k	3	39	80	90	151	100	38	84	49	125	10	154	32	68	100	82	116	47	62	37	62	22	79
Atp5k-ps2	0	4	8	10	14	9	4	10	2	19	0	13	7	7	11	12	12	5	7	5	6	3	7
Atp5l	0	5	10	4	9	8	5	1	2	6	0	12	2	6	8	6	9	2	5	5	3	1	6
Atp5l-ps1	0	1	0	0	0	0	0	0	1	1	0	0	0	0	0	0	0	0	0	0	0	0	0
Atp5l-ps2	0	0	0	0	1	2	0	1	0	2	0	1	0	0	0	0	0	0	0	0	0	0	1
Atp5l2-ps	0	0	0	0	0	1	1	0	0	0	0	0	1	0	0	2	0	0	2	0	0	0	0
Atp5mpl	1	42	80	90	157	113	44	74	42	70	15	166	42	82	93	78	146	71	66	28	63	25	100
Atp5s	0	0	6	5	0	4	3	4	1	1	0	5	2	3	4	4	4	3	3	4	1	1	4
Atp6ap1	2	13	38	36	43	36	11	35	22	46	7	41	13	21	52	33	39	35	25	17	19	9	38
Atp6ap2	0	7	18	15	21	20	7	15	8	14	2	25	11	15	27	18	33	12	16	8	12	5	17
Atp6v0a1	0	0	1	0	0	1	0	0	0	0	0	2	0	0	2	1	0	0	0	0	0	0	0
Atp6v0a2	0	22	43	29	44	39	24	45	14	49	7	28	6	18	36	28	38	20	23	7	19	5	26
Atp6v0b	0	19	30	34	42	35	20	25	16	38	5	41	12	22	36	40	56	28	31	15	18	11	40
Atp6v0c	0	0	0	0	0	0	0	0	0	0	0	0	0	0	0	0	1	0	0	0	0	0	0
Atp6v0c-ps2	0	0	0	1	0	0	0	0	0	0	0	0	0	0	0	1	1	1	0	0	0	0	0
Atp6v0d1	0	20	28	31	53	40	16	38	21	38	8	34	12	16	28	34	35	20	25	16	25	9	33
Atp6v0d2	0	0	0	1	0	0	0	0	0	0	0	3	0	2	0	0	0	1	0	0	0	0	0
Atp6v0e	7	76	116	155	194	154	84	136	70	214	31	191	43	99	161	131	193	92	133	62	86	40	129
Atp6v0e2	0	0	0	2	0	0	0	0	0	0	0	0	0	0	0	0	0	0	0	0	0	0	0
Atp6v1a	1	4	9	7	12	12	5	15	4	10	0	12	3	10	14	4	8	2	9	4	4	2	9
Atp6v1b2	0	6	17	16	17	20	11	16	6	17	0	32	11	13	16	12	15	4	9	5	8	3	20
Atp6v1c1	1	21	28	27	44	55	9	29	14	26	2	35	9	21	39	25	41	31	32	10	18	5	35
Atp6v1d	0	16	35	46	76	78	28	46	26	55	5	64	24	35	85	30	63	42	48	23	35	19	39
Atp6v1e1	1	22	41	57	61	35	23	44	19	47	9	46	11	21	56	36	84	26	31	20	27	14	42
Atp6v1f	6	68	153	122	183	142	75	152	89	162	34	151	63	76	147	112	189	90	106	57	84	44	132
Atp6v1fnb	0	0	0	0	0	0	0	0	0	0	0	0	0	0	0	0	0	0	0	0	0	0	0
Atp6v1g1	6	29	45	51	64	60	24	47	31	77	13	77	25	20	64	42	81	49	44	24	32	17	59
Atp6v1g2	0	0	0	2	0	0	0	0	2	0	0	1	1	0	1	2	0	0	0	0	2	0	0
Atp6v1g3	0	0	0	0	1	0	0	2	0	0	0	1	0	0	0	1	0	0	1	0	1	0	0
Atp6v1h	3	11	21	21	34	26	16	24	11	25	2	33	11	13	30	22	30	16	17	11	14	5	31
Atp7a	0	1	3	2	0	5	1	1	3	1	0	2	1	2	2	4	4	2	1	1	2	0	2
Atp8a1	0	2	2	3	4	5	2	2	1	4	0	5	1	1	3	1	2	1	2	0	3	0	2
Atp8a2	0	8	12	20	12	12	2	2	2	4	1	6	2	3	10	6	8	1	0	1	1	1	4
Atp8b1	0	0	0	1	0	0	0	0	0	0	0	0	0	0	0	0	0	0	0	0	0	0	0
Atp8b2	0	2	0	0	3	4	3	2	0	1	1	3	0	0	1	3	3	2	1	0	4	1	2
Atp8b4	0	11	30	31	49	46	9	20	10	15	2	34	10	14	60	22	55	25	24	16	15	14	18
Atp9a	0	0	0	1	1	1	0	0	0	3	0	0	0	0	1	0	0	0	0	1	0	0	1
Atp9b	0	6	8	8	10	11	8	12	2	12	1	14	5	6	5	6	17	11	6	6	9	0	11
Atpaf1	0	0	0	1	1	3	0	3	0	1	0	2	0	2	2	3	3	1	5	0	0	0	2
Atpaf2	0	11	20	22	36	32	12	17	7	23	1	29	12	21	27	22	29	19	17	9	12	3	32
Atpif1	0	22	25	38	48	43	29	52	24	55	8	78	16	30	35	36	43	42	51	10	34	7	37
Atr	1	0	2	0	3	8	1	6	0	1	1	5	0	1	5	1	6	5	0	3	5	2	3
Atraid	0	7	10	25	52	32	12	18	17	21	3	36	22	13	44	20	36	30	13	10	12	4	38
Atrip	0	6	5	15	16	15	7	11	7	10	0	9	2	7	7	9	20	9	5	5	13	4	6
Atrn	0	2	1	1	1	1	0	1	0	0	0	0	1	3	1	0	2	2	3	1	0	0	1
Atrnl1	0	0	1	0	0	0	0	0	0	0	0	1	0	0	0	0	0	0	0	1	1	0	0
Atrx	7	36	57	58	82	88	35	74	35	65	15	79	33	52	88	34	93	52	60	33	53	18	47
Atxn1	1	6	7	9	7	11	12	18	7	18	1	8	2	7	8	5	12	4	12	9	5	4	13
Atxn10	0	12	17	16	26	25	16	25	13	27	6	31	10	20	29	15	27	14	13	6	14	7	12
Atxn1l	0	0	1	3	4	2	3	1	0	3	0	3	1	3	0	0	1	0	3	0	0	1	2
Atxn2	0	0	1	2	3	0	0	1	0	1	1	4	0	1	2	1	1	0	2	0	0	0	1
Atxn2l	0	7	10	7	17	10	6	23	9	18	3	26	8	8	20	10	16	14	9	5	9	5	26
Atxn3	0	2	3	3	7	3	3	4	5	12	1	7	3	8	6	5	7	4	5	6	6	3	7
Atxn7	1	2	2	7	2	6	1	3	2	4	1	12	1	2	3	7	4	6	2	0	4	1	7
Atxn7l1	0	3	13	16	20	23	7	8	8	15	2	9	3	5	23	12	17	7	3	6	7	3	12
Atxn7l1os2	0	0	0	0	0	2	0	0	0	0	0	0	0	0	0	0	0	0	0	0	0	0	0
Atxn7l2	0	1	2	1	3	5	1	0	0	2	0	4	2	3	3	1	3	2	3	2	4	0	5
Atxn7l3	0	3	5	7	12	10	5	7	6	5	1	14	4	4	5	6	12	6	4	3	4	0	8
Atxn7l3b	2	19	42	34	65	41	23	34	22	48	9	72	16	18	47	34	60	34	24	19	23	9	39
Auh	1	15	18	16	22	25	16	18	11	19	2	18	8	5	25	16	19	10	8	9	15	5	14
Aunip	0	0	0	0	0	0	0	0	0	1	0	0	0	0	0	0	0	0	0	0	0	0	0
Aup1	1	55	95	101	136	135	59	93	51	121	24	120	41	51	110	81	140	64	81	38	65	26	94
Aurka	0	2	3	2	4	4	2	0	0	3	0	2	2	7	3	1	1	0	2	0	2	1	1
Aurkaip1	3	34	62	63	88	87	42	65	29	86	8	87	28	36	71	69	93	30	61	29	48	17	66
Aurkb	0	3	0	0	0	0	1	0	0	3	1	0	0	0	0	1	1	0	0	2	1	1	1
Auts2	0	0	0	0	0	0	0	0	0	0	0	0	0	1	1	0	1	0	1	0	0	0	0
Aven	1	0	3	2	10	8	1	4	1	3	0	5	4	4	7	2	8	2	2	1	1	1	4
Avil	0	0	0	0	0	0	0	0	0	0	0	0	0	0	0	0	1	0	0	0	0	0	0
Avl9	0	5	8	8	9	14	6	9	4	15	4	13	8	6	14	11	21	8	14	8	9	4	9
Avp	0	0	0	0	0	0	0	0	0	0	0	0	0	0	0	0	0	0	0	0	0	0	0
Avpi1	1	3	1	1	9	3	2	2	1	6	0	9	1	3	8	4	9	1	3	2	2	2	5
Avpr2	0	0	0	1	0	0	1	0	0	0	0	0	0	0	0	1	0	1	0	0	0	0	0
Awat2	0	0	0	0	0	0	0	0	0	0	0	0	0	0	0	0	1	0	0	0	0	0	0
Axdnd1	0	0	0	0	0	0	0	1	0	0	0	0	0	0	1	0	0	0	0	0	0	0	0
Axin1	0	1	6	5	7	6	2	7	0	6	1	8	4	2	4	1	8	0	5	3	1	3	5
Axin2	0	2	2	4	6	5	2	2	0	1	0	5	2	4	2	4	4	0	1	1	2	1	2
Axl	0	1	1	1	4	2	0	1	1	5	0	2	0	3	5	1	2	0	0	0	0	0	1
Azi2	0	16	36	28	39	49	21	49	36	54	3	48	13	20	41	30	49	29	37	19	28	12	50
Azin1	2	7	18	16	25	26	10	15	10	24	4	25	4	12	20	11	16	17	22	3	15	2	11
B130006D01Rik	0	0	0	0	0	0	0	0	0	0	0	1	0	1	0	0	1	0	0	1	0	0	2
B130021K23Rik	0	2	3	1	1	8	6	3	2	3	1	4	1	1	4	3	4	3	1	4	6	3	2
B130034C11Rik	0	0	1	0	1	1	0	0	0	0	0	5	1	0	0	1	0	0	1	0	1	0	0
B130046B21Rik	0	0	1	0	0	0	0	0	0	0	0	0	0	0	1	0	0	0	0	0	0	1	0
B130055M24Rik	0	0	0	0	2	0	2	0	0	0	0	0	1	1	0	1	1	0	1	0	0	0	0
B230110C06Rik	0	0	0	0	0	0	0	0	0	0	0	0	0	2	0	0	0	0	0	0	0	0	0
B230112G18Rik	0	0	0	0	0	0	0	0	0	0	0	0	1	0	0	0	0	0	0	0	1	0	0
B230118H07Rik	0	0	0	0	1	1	0	1	0	1	0	1	1	1	0	0	1	0	0	0	0	0	1
B230206I08Rik	0	0	0	0	0	0	0	0	0	1	0	0	0	0	0	0	0	1	0	0	0	0	0
B230208H11Rik	0	0	3	0	0	0	1	0	0	1	0	1	0	0	0	1	0	0	0	2	2	1	0
B230216N24Rik	0	0	0	0	0	0	0	0	0	1	0	0	0	0	0	0	0	0	0	0	0	0	0
B230217C12Rik	0	0	0	0	3	1	0	1	0	0	0	0	0	0	0	1	1	1	1	0	1	0	0
B230217O12Rik	0	1	2	2	0	4	0	0	0	2	1	1	3	1	0	0	0	1	0	1	3	0	0
B230219D22Rik	0	3	8	7	6	8	4	5	9	11	2	20	2	2	7	8	8	10	12	3	10	0	9
B230303O12Rik	0	0	0	0	0	0	0	0	0	1	0	0	0	0	0	0	0	0	0	0	0	0	0
B230307C23Rik	1	6	9	8	14	11	6	6	2	8	2	23	0	2	17	11	10	11	3	7	7	1	7
B230317F23Rik	0	1	0	1	0	0	0	0	0	0	0	2	0	0	0	0	0	1	0	0	0	0	0
B230322F03Rik	0	0	0	0	0	1	0	0	0	0	0	2	0	0	0	0	0	0	0	0	0	0	1
B230354K17Rik	0	3	2	2	1	0	0	3	0	1	0	1	0	3	1	1	1	1	1	0	1	0	1
B230359F08Rik	0	1	0	1	1	0	0	0	0	0	0	1	0	0	0	0	1	0	0	0	0	0	0
B230362B09Rik	0	0	1	0	1	0	1	0	0	1	0	0	0	0	0	2	0	0	0	0	0	0	0
B230369F24Rik	0	2	0	1	3	2	0	1	0	2	0	1	1	0	1	0	1	0	0	2	0	0	0
B230377A18Rik	0	0	0	0	0	0	0	0	1	0	0	0	0	0	2	0	0	0	0	0	0	0	0
B230398E01Rik	0	0	0	0	0	0	0	1	0	0	0	0	0	0	0	0	0	0	0	0	0	0	0
B2m	132	1500	2458	2487	4052	2830	1429	2552	1502	3046	492	2877	1174	1702	3465	2159	3438	2004	2130	1231	1925	677	2686
B330016D10Rik	0	0	1	0	4	1	1	3	1	2	0	8	1	0	1	1	1	1	0	1	3	0	0
B3galnt1	0	0	0	0	0	2	0	0	0	0	0	0	0	0	1	0	1	0	1	1	0	0	1
B3galnt2	2	4	9	4	19	16	4	10	3	12	0	27	7	8	12	6	22	4	9	3	4	4	10
B3galt2	0	0	0	0	0	1	0	0	0	0	0	0	0	0	0	0	0	0	0	0	0	0	0
B3galt4	0	4	0	4	6	5	1	3	0	2	0	12	1	1	4	3	3	2	2	1	0	4	10
B3galt5	0	0	3	2	2	4	2	0	0	3	0	0	1	1	3	0	5	0	0	0	0	0	0
B3galt6	0	1	3	7	7	5	1	5	2	2	1	9	1	5	2	6	5	0	2	3	3	2	5
B3gat3	0	12	15	22	16	10	4	14	4	16	3	16	9	14	12	5	16	7	18	5	9	2	12
B3glct	0	1	2	3	3	2	0	2	1	2	1	2	0	3	1	0	4	3	3	2	1	0	2
B3gnt2	0	0	5	10	1	4	0	5	0	2	0	10	1	7	1	2	7	1	2	4	4	0	3
B3gnt3	0	0	0	0	1	1	2	0	0	1	0	7	0	1	0	1	1	2	2	0	0	0	2
B3gnt5	0	4	4	9	10	4	3	5	5	5	1	17	7	6	10	8	9	5	4	2	4	2	9
B3gnt7	0	0	2	1	0	0	0	3	2	0	0	2	0	1	0	1	1	0	0	0	0	0	0
B3gnt8	0	0	0	0	1	0	0	0	0	0	0	1	3	1	2	0	2	3	2	1	0	4	2
B3gnt9	0	0	1	1	2	2	2	3	0	2	0	2	0	3	1	1	1	0	1	0	0	0	1
B3gntl1	0	3	2	1	2	3	0	4	1	3	0	5	0	0	4	1	2	0	1	2	2	2	2
B430010I23Rik	0	0	0	0	0	0	0	0	0	0	0	0	0	0	0	0	0	0	0	0	0	0	0
B430218F22Rik	0	0	0	0	1	0	0	0	0	2	0	0	1	0	1	0	0	0	0	0	1	0	0
B430219N15Rik	0	0	1	0	0	0	0	0	0	0	0	0	0	0	0	0	1	1	0	0	0	0	1
B430305J03Rik	0	0	0	0	0	0	0	0	0	0	0	0	0	0	0	0	0	0	0	0	0	0	1
B430306N03Rik	0	1	1	0	0	0	0	0	0	0	0	2	0	2	1	0	4	3	3	1	2	1	0
B430319F04Rik	0	1	0	0	0	0	0	0	0	0	0	0	0	1	0	0	0	0	0	0	0	0	0
B4galnt1	4	113	199	209	334	277	92	215	78	194	41	392	101	138	320	171	301	157	178	112	140	54	227
B4galnt4	0	0	2	0	0	0	1	3	0	2	0	2	0	0	0	0	1	0	0	1	0	1	0
B4galt1	0	16	18	25	41	33	8	22	11	22	3	35	12	27	28	23	45	26	19	17	18	7	33
B4galt3	0	3	6	5	16	24	5	7	2	9	1	11	5	8	15	9	8	15	13	4	16	4	8
B4galt4	0	0	1	2	3	3	0	3	2	9	0	1	0	2	2	0	3	2	1	1	0	0	0
B4galt5	0	1	2	3	4	3	3	6	0	2	1	5	2	1	2	5	2	1	3	2	2	1	4
B4galt6	0	0	0	0	0	0	0	0	0	0	0	0	0	0	0	0	0	0	0	0	0	0	0
B4galt7	1	10	27	15	23	22	2	6	8	13	4	23	7	13	25	23	22	11	7	9	9	3	10
B4gat1	0	1	6	2	8	1	0	1	2	1	0	9	2	4	5	6	5	3	3	1	4	2	4
B630019A10Rik	0	0	0	0	0	0	0	1	0	0	0	1	0	0	0	0	0	0	0	0	0	0	0
B630019K06Rik	0	0	1	1	0	0	0	1	1	0	0	0	0	0	1	1	1	0	0	0	0	0	0
B930018H19Rik	0	0	0	0	0	0	0	0	0	0	0	0	0	0	0	0	0	0	0	0	0	0	0
B930036N10Rik	0	1	4	6	8	2	7	4	1	8	2	4	0	4	1	1	9	4	2	1	0	0	1
B930059L03Rik	0	0	0	1	0	4	0	1	1	1	0	0	0	0	0	0	1	0	1	0	0	0	0
B930086L07Rik	0	0	0	0	0	0	0	0	0	0	0	0	0	0	0	0	0	0	0	0	0	0	0
B930094E09Rik	0	0	0	0	0	1	0	0	0	0	0	0	0	0	0	0	0	0	0	0	0	0	0
B930095G15Rik	0	1	0	0	1	1	1	0	1	3	0	0	0	0	4	0	0	2	0	1	0	0	0
B9d1	0	0	0	0	0	0	2	1	0	0	0	1	0	0	0	0	0	0	0	0	0	0	1
B9d2	0	12	10	8	16	26	12	9	2	12	1	15	13	14	10	11	24	11	10	6	4	3	6
BB557941	0	0	0	0	0	0	0	1	0	0	0	0	0	0	0	0	0	0	0	0	0	0	0
BC002059	0	1	1	1	3	1	0	0	1	0	0	4	1	1	3	1	1	5	1	0	3	0	3
BC002163	0	10	37	22	39	32	13	15	10	36	2	35	7	16	29	27	26	29	20	7	11	6	17
BC003965	0	10	8	16	14	21	7	8	6	9	2	30	3	8	10	11	25	10	14	13	10	4	9
BC004004	1	15	39	29	45	47	15	22	14	31	2	43	15	20	44	30	47	15	30	17	17	10	37
BC005537	0	8	7	5	14	11	6	14	5	13	1	21	6	9	19	7	16	10	10	3	3	5	18
BC005561	1	1	4	3	1	0	2	2	2	0	1	8	1	1	7	1	3	1	3	1	3	1	4
BC005624	1	11	21	33	31	35	15	32	9	34	4	46	15	20	42	29	32	16	22	13	17	3	23
BC017158	0	1	0	3	0	1	0	1	0	5	0	9	0	0	2	0	0	0	1	2	1	0	1
BC018473	0	0	0	0	0	1	0	0	0	0	0	0	0	0	0	0	0	1	0	0	0	0	0
BC022960	0	0	0	0	0	0	0	0	0	0	0	0	0	0	0	0	0	0	0	0	0	0	0
BC024063	0	0	0	0	0	1	0	0	1	3	0	1	0	2	1	0	1	0	0	0	0	0	1
BC024386	0	0	0	0	0	0	0	0	0	0	0	0	0	0	0	0	0	0	1	0	0	0	0
BC024978	0	0	1	0	1	1	2	1	1	0	0	2	0	1	0	0	0	1	1	1	1	1	0
BC025446	0	0	0	0	0	0	0	0	0	0	0	0	0	0	0	0	0	0	0	0	0	0	0
BC025920	0	1	2	1	0	0	1	0	2	1	0	8	0	0	1	1	3	1	1	2	0	0	1
BC028528	0	1	0	0	0	1	1	0	0	0	0	8	1	0	4	1	2	0	1	0	2	0	1
BC029722	0	11	23	24	32	19	4	23	10	15	6	37	8	16	25	14	19	14	13	10	6	4	32
BC030867	0	0	0	0	0	0	0	0	0	0	0	0	0	0	0	0	0	0	0	0	0	0	0
BC031181	5	41	54	50	73	60	30	50	28	56	6	68	26	27	73	55	77	48	51	20	42	18	69
BC034090	0	0	0	0	0	0	0	0	0	0	0	0	0	0	0	0	0	0	0	0	0	0	0
BC035044	1	1	1	1	2	4	1	0	0	1	0	1	0	0	1	3	3	0	7	1	1	0	1
BC035947	0	0	0	0	0	0	0	0	0	0	0	1	0	0	0	0	0	0	0	0	0	0	0
BC037032	0	0	0	0	0	0	0	1	0	0	0	1	0	0	0	0	1	0	0	0	0	0	1
BC037034	0	2	7	5	6	2	0	2	1	2	0	9	0	3	4	0	2	3	0	0	0	0	2
BC037039	0	0	0	0	0	0	0	0	0	0	0	0	0	0	1	0	0	0	0	1	2	0	0
BC043934	1	1	3	5	12	3	2	7	2	0	1	32	2	4	9	6	11	4	10	2	1	0	5
BC046251	0	0	0	0	0	0	0	0	0	0	0	0	0	0	0	0	0	0	0	0	0	0	0
BC048403	1	2	3	3	3	5	2	3	1	1	0	8	4	2	1	2	4	4	3	1	0	0	2
BC048507	0	2	8	6	11	4	4	6	8	11	0	16	8	5	10	7	16	6	8	5	8	5	11
BC048559	0	0	0	0	0	0	0	0	0	0	0	0	0	0	0	0	0	0	0	0	0	0	0
BC049352	0	1	1	0	0	1	0	0	0	2	0	0	0	0	1	0	0	1	1	0	0	0	1
BC049715	0	1	2	1	0	1	0	0	1	3	0	0	0	0	1	2	2	1	0	0	0	0	0
BC049762	0	0	0	0	0	0	0	0	0	0	0	0	0	0	0	0	1	0	0	1	0	0	0
BC051142	0	0	0	0	0	1	0	0	0	0	0	1	0	0	0	0	0	0	0	0	0	0	0
BC051226	0	0	2	2	2	2	1	0	0	1	1	4	0	6	4	2	1	1	1	1	1	1	1
BC051537	0	0	0	0	0	0	0	0	0	0	0	2	0	1	0	0	0	0	0	0	0	0	0
BC052040	0	3	3	2	7	5	3	7	1	2	2	5	2	0	5	6	9	3	1	1	2	0	6
BC055308	0	0	0	0	0	0	0	0	0	0	0	0	0	0	0	0	0	0	1	0	0	0	0
BC055324	0	1	0	0	0	2	0	0	0	1	0	1	0	3	0	0	0	0	0	0	1	0	1
BC060293	0	0	1	0	0	0	0	0	0	0	0	0	0	0	0	0	0	0	0	0	0	0	0
BC064078	1	6	11	13	11	15	2	6	0	4	2	12	3	8	8	8	12	3	3	1	5	2	4
BC065397	0	0	4	3	4	2	0	0	0	3	0	6	0	1	4	4	5	1	3	0	2	1	5
BC067074	0	0	0	0	0	0	0	0	0	0	0	0	0	0	0	0	0	0	0	0	0	0	0
BC085271	0	0	1	0	0	0	0	0	0	0	0	0	0	0	0	0	0	0	0	2	0	0	0
BC106179	0	0	0	0	0	0	0	0	0	0	0	0	0	1	0	0	0	0	0	1	1	0	0
BC147527	0	6	9	13	14	15	5	13	8	11	1	23	4	4	16	7	13	6	9	2	4	3	11
BE692007	0	6	11	5	9	15	7	11	13	28	4	40	4	7	10	3	15	6	11	2	7	1	13
Babam1	0	19	30	26	41	32	14	26	17	20	8	30	18	22	35	29	47	21	25	19	21	10	39
Babam2	1	7	16	20	40	18	14	25	10	31	0	24	7	12	24	22	27	21	12	10	11	10	18
Bace1	0	0	0	1	0	0	2	2	0	0	0	1	0	1	2	0	1	1	1	0	1	0	0
Bace2	0	0	0	0	0	0	0	0	0	0	0	0	0	0	0	0	0	0	0	0	0	0	0
Bach1	1	0	9	6	2	9	0	5	0	0	0	5	1	3	4	2	8	2	2	1	3	2	6
Bach2	0	1	2	0	2	3	2	2	1	1	0	4	0	1	3	0	1	1	4	7	2	0	1
Bach2it1	0	1	0	0	6	3	0	0	0	1	0	1	1	3	4	5	3	0	3	2	2	0	1
Bach2os	0	0	0	0	0	1	0	0	0	0	0	0	0	0	0	0	0	0	0	0	0	0	0
Bad	0	10	10	10	21	11	3	13	6	15	4	14	16	11	21	9	20	14	7	5	10	6	13
Bag1	1	17	24	20	48	25	13	15	9	25	8	33	8	8	18	10	24	9	8	15	13	7	24
Bag2	0	2	1	1	0	2	0	0	0	0	0	3	0	1	2	2	1	0	1	1	0	0	1
Bag3	1	5	13	7	4	6	2	5	2	1	0	4	1	1	11	3	8	8	7	6	5	2	11
Bag4	0	3	4	0	7	4	2	2	1	4	0	10	4	3	5	6	8	2	0	1	3	0	3
Bag5	0	12	15	12	24	19	6	16	9	19	2	21	11	10	19	14	22	7	14	8	18	4	11
Bag6	1	14	28	22	31	27	7	20	8	10	2	17	12	14	31	20	31	16	14	6	16	3	9
Bahcc1	0	0	0	0	0	0	0	0	0	0	0	0	0	0	0	0	0	0	1	0	0	0	0
Bahd1	0	2	0	2	0	0	4	2	0	1	0	2	2	1	2	6	1	0	4	0	1	1	4
Baiap2	0	6	4	9	9	11	4	12	5	10	0	6	3	4	5	11	5	1	4	3	5	3	9
Baiap2l2	0	0	0	1	0	0	0	1	0	0	0	0	1	0	0	0	1	0	0	0	0	0	1
Baiap3	4	15	44	41	51	64	37	87	40	70	16	55	16	24	52	34	42	30	35	28	34	7	34
Bak1	0	4	6	10	8	8	5	3	7	8	2	11	1	10	15	5	18	3	3	8	6	1	10
Bambi	0	7	7	9	9	6	3	7	1	4	0	0	0	6	8	5	7	2	1	8	3	0	4
Bambi-ps1	0	0	0	0	0	1	0	0	0	0	0	0	0	3	0	0	1	0	0	0	1	0	0
Banf1	3	45	86	87	148	118	54	73	50	85	12	182	47	58	112	94	146	62	92	41	61	20	96
Bank1	0	2	0	2	2	0	1	0	0	1	0	11	0	0	1	0	0	0	1	0	0	0	3
Banp	0	3	5	8	8	12	5	3	3	15	0	16	3	0	12	8	15	4	4	0	4	0	9
Bap1	0	14	21	7	24	16	12	12	7	23	4	14	4	10	15	14	19	11	16	10	7	8	10
Bard1	0	0	1	2	1	0	3	2	1	1	0	1	1	2	2	0	1	2	0	1	1	0	0
Barhl1	1	0	0	0	0	0	0	0	0	0	0	0	0	0	0	0	0	0	0	0	1	0	0
Basp1	0	0	0	0	0	0	0	0	0	0	0	3	0	0	0	0	2	0	1	0	0	0	0
Batf	1	21	31	23	54	16	48	79	71	145	17	41	10	25	26	19	34	48	68	33	52	13	50
Batf2	0	0	0	0	0	0	0	0	0	0	0	0	0	0	0	0	0	0	0	0	0	0	0
Batf3	0	0	0	0	0	0	0	0	0	0	0	8	0	4	1	0	1	1	0	0	0	0	0
Bax	4	35	81	59	105	75	36	46	36	119	9	79	24	38	84	71	113	58	53	36	44	17	60
Baz1a	0	8	10	7	17	12	11	18	24	27	10	21	11	11	12	6	25	9	24	12	10	1	11
Baz1b	0	18	27	23	26	26	20	33	11	19	8	41	10	20	27	17	56	18	22	14	18	5	29
Baz2a	2	12	11	20	15	16	9	19	6	22	4	29	8	18	22	12	22	16	15	8	9	3	20
Baz2b	0	12	10	4	2	5	9	12	4	12	3	11	2	8	6	3	12	13	10	8	10	0	9
Bbc3	0	6	2	6	11	10	4	3	5	2	0	9	2	5	12	5	8	7	6	1	3	0	4
Bbip1	1	12	22	11	31	33	15	32	17	25	2	28	11	16	21	19	31	21	10	7	27	5	35
Bbof1	0	0	0	1	0	0	0	1	2	0	0	1	0	0	2	0	1	1	1	0	0	0	1
Bbs1	0	0	0	0	0	0	0	0	0	0	0	0	0	0	0	0	0	0	0	0	0	0	0
Bbs10	0	0	0	0	0	0	0	0	0	0	0	1	0	0	0	0	0	0	2	0	0	0	0
Bbs12	0	1	4	2	1	1	0	1	0	0	0	3	0	1	0	0	0	3	0	0	0	0	0
Bbs2	0	0	1	2	6	1	0	5	0	3	1	3	1	2	1	1	4	4	0	0	1	0	3
Bbs4	0	2	3	1	2	6	2	1	3	7	0	0	1	4	5	5	7	0	2	2	4	0	1
Bbs7	0	0	1	0	0	0	0	0	1	0	0	1	0	0	0	0	0	0	0	0	0	0	0
Bbs9	1	4	6	3	19	8	0	3	0	2	0	16	2	5	13	10	10	5	7	3	7	0	9
Bbx	1	11	14	16	29	15	9	18	9	22	5	23	10	18	17	17	17	20	16	9	9	4	17
Bc1	0	0	9	3	2	0	0	1	0	1	0	1	1	2	3	2	3	0	1	1	0	1	0
Bcam	0	0	0	0	0	0	0	0	0	0	0	0	0	0	0	0	0	0	0	0	0	0	0
Bcap29	1	11	17	25	37	27	14	24	17	31	2	44	9	22	41	19	32	16	22	12	19	10	25
Bcap31	2	40	77	64	126	100	33	67	31	69	8	91	36	39	103	89	111	61	54	38	50	19	75
Bcar1	0	0	0	0	1	0	0	0	0	0	0	0	0	0	0	0	0	0	0	0	0	0	0
Bcar3	0	0	1	0	0	0	1	0	0	0	0	1	0	0	0	0	0	0	0	0	0	0	0
Bcas2	0	38	66	61	84	70	44	64	33	66	12	96	27	49	62	49	70	47	48	37	64	13	72
Bcas3	0	5	5	5	7	7	2	4	1	8	0	9	4	3	19	3	9	4	6	2	8	2	7
Bcas3os1	0	0	0	0	0	0	0	0	0	0	0	0	0	1	0	0	0	0	0	0	0	0	0
Bcat1	0	0	0	0	0	0	0	1	0	0	0	0	0	0	0	0	0	0	3	1	0	0	0
Bcat2	0	4	3	4	6	11	3	3	1	3	0	8	5	5	2	6	8	2	6	3	3	0	3
Bccip	4	30	39	34	65	52	34	40	24	61	5	73	19	34	50	27	43	40	40	22	42	9	46
Bcdin3d	0	1	13	9	15	6	3	7	2	2	0	16	2	10	5	5	15	3	3	0	3	0	2
Bckdha	0	4	4	8	15	14	2	12	1	13	1	13	7	10	15	11	15	5	8	3	11	3	11
Bckdhb	0	0	3	2	3	2	0	0	1	2	1	6	0	2	4	2	4	1	2	0	2	1	3
Bckdk	0	8	18	18	20	13	9	22	7	10	2	22	8	9	16	11	19	9	14	4	9	0	14
Bcl10	0	15	17	28	40	33	14	26	21	22	6	33	13	18	30	30	56	21	30	10	28	7	19
Bcl11a	0	0	0	0	0	3	0	1	0	0	0	3	4	6	0	6	4	9	6	0	5	1	16
Bcl11b	5	44	56	39	54	45	34	73	22	61	11	51	26	37	61	35	63	37	41	22	31	10	48
Bcl2	6	60	91	94	185	161	73	108	41	124	15	160	60	70	144	85	122	69	111	46	62	16	98
Bcl2a1a	0	0	0	0	0	0	1	1	0	1	0	4	0	0	0	1	1	0	0	0	0	0	0
Bcl2a1b	0	18	50	48	42	47	29	55	41	76	16	31	11	24	29	27	43	24	37	20	34	4	36
Bcl2a1c	0	0	1	0	0	0	1	0	2	0	0	0	0	0	0	0	0	0	0	0	0	0	1
Bcl2a1d	1	5	23	18	16	15	18	29	22	41	6	14	5	9	11	15	17	19	14	10	14	5	22
Bcl2l1	1	10	14	15	20	18	2	17	6	17	3	12	4	6	21	11	15	13	4	6	10	2	11
Bcl2l11	0	2	8	15	8	9	5	9	4	13	1	12	4	10	12	13	11	5	8	3	9	0	8
Bcl2l12	0	5	9	9	12	9	4	7	6	4	3	19	5	4	8	11	20	5	7	3	4	2	13
Bcl2l13	1	10	12	4	13	9	1	6	1	10	2	23	7	7	17	12	15	8	7	6	8	0	10
Bcl2l14	0	0	1	0	0	1	0	0	0	0	0	1	0	0	0	0	0	0	0	0	0	0	0
Bcl2l15	0	0	2	0	2	1	2	0	0	1	0	0	0	0	0	0	0	1	0	0	0	0	1
Bcl2l2	0	1	0	0	2	0	0	1	0	1	2	1	1	0	0	2	2	1	0	0	1	0	0
Bcl3	0	0	0	2	2	6	3	8	3	10	0	4	2	1	5	2	4	6	4	4	4	3	10
Bcl6	0	0	1	0	0	0	0	0	0	0	0	1	0	0	2	0	0	0	0	3	0	0	1
Bcl7a	0	2	3	3	1	4	1	2	1	4	0	8	2	4	4	6	6	1	4	2	1	0	2
Bcl7b	6	18	34	44	51	49	20	39	18	43	6	59	14	20	48	29	68	27	35	25	31	6	38
Bcl7c	0	2	2	2	1	0	1	1	3	0	0	5	0	1	1	3	5	2	1	0	1	0	1
Bcl9	0	0	0	0	1	1	0	0	0	1	0	1	0	0	0	1	0	0	0	1	0	0	0
Bcl9l	0	2	3	2	13	2	3	2	1	0	0	10	1	8	4	5	6	2	6	3	5	0	3
Bclaf1	2	43	50	46	99	76	34	53	22	57	11	94	37	56	74	59	70	34	46	32	63	24	54
Bclaf3	0	8	9	15	14	24	8	16	8	15	0	13	3	9	9	15	9	3	18	6	7	4	11
Bco1	0	0	0	0	0	0	0	0	0	1	0	0	0	0	0	0	0	0	0	0	0	0	0
Bco2	0	0	1	0	0	1	0	0	1	0	0	0	0	0	1	0	0	2	0	0	0	0	1
Bcor	0	2	9	6	5	6	4	2	4	8	0	6	0	2	6	2	7	2	5	1	2	0	3
Bcorl1	0	2	1	1	3	1	1	0	0	0	0	3	2	1	0	1	4	1	2	0	1	0	2
Bcr	1	0	1	3	1	1	0	2	0	1	0	2	0	0	2	0	1	2	1	0	0	0	0
Bcs1l	0	1	4	4	13	3	0	5	2	14	0	14	4	5	10	2	6	9	10	1	3	1	7
Bdh1	1	9	10	8	12	11	5	8	2	4	1	18	4	10	8	6	17	11	10	5	7	2	3
Bdkrb1	0	0	0	0	0	0	0	0	0	1	0	0	0	0	0	0	0	0	0	0	0	0	0
Bdkrb2	0	0	0	0	0	0	0	0	0	0	0	0	0	1	0	0	0	0	0	0	0	0	0
Bdnf	0	0	0	0	0	0	0	0	0	0	0	0	0	0	0	0	0	0	0	0	0	0	0
Bdp1	2	21	62	27	50	64	22	42	14	23	3	74	24	26	59	29	63	31	36	18	23	14	39
Becn1	1	23	36	48	67	44	26	43	14	50	8	51	14	16	60	43	43	34	45	16	33	9	57
Bend3	0	0	0	0	1	0	0	0	0	0	0	0	0	0	1	0	0	0	1	0	0	0	0
Bend4	0	1	1	0	3	2	1	4	1	1	0	1	6	2	1	0	1	0	3	0	1	0	2
Bend5	0	0	3	0	0	2	0	2	1	1	1	2	1	0	0	0	2	0	2	0	0	1	0
Bend6	0	1	2	1	0	1	1	3	2	4	0	3	1	0	0	4	4	1	0	0	0	1	0
Best1	0	0	0	0	0	0	0	0	0	0	0	0	0	0	0	0	0	1	0	0	0	0	0
Bet1	0	3	15	8	12	16	7	9	5	11	0	16	2	9	11	7	22	10	11	3	9	2	8
Bet1l	0	7	8	16	17	15	12	14	8	11	0	25	4	11	21	7	23	9	10	9	8	3	16
Bex2	3	1	2	1	4	2	1	0	0	1	0	4	2	0	7	5	3	0	1	3	1	1	2
Bex3	1	20	41	56	68	50	18	42	23	53	5	47	21	18	60	22	45	20	27	19	34	14	56
Bex4	0	0	0	0	0	0	0	0	0	0	0	0	0	0	0	0	0	0	0	0	0	0	0
Bex6	0	0	0	0	0	0	0	0	0	0	0	0	0	0	0	0	0	0	0	0	0	0	0
Bfar	2	6	19	20	28	26	8	26	7	12	8	42	15	20	39	16	33	26	28	9	16	6	24
Bfsp1	0	0	0	1	0	1	0	0	0	0	0	0	0	1	0	0	1	0	0	0	0	0	0
Bfsp2	0	0	0	0	0	0	0	0	0	0	0	0	0	0	0	0	0	0	0	0	0	0	0
Bglap3	0	0	0	0	0	0	0	0	0	0	0	0	0	0	0	0	0	0	0	0	0	1	0
Bgn	0	0	0	0	0	0	0	0	0	1	0	0	0	0	0	1	1	0	0	0	0	0	0
Bhlha15	0	0	0	0	0	0	0	0	0	0	0	0	0	0	0	0	0	0	0	0	0	0	0
Bhlhb9	0	3	14	3	6	10	3	10	5	14	2	21	6	8	10	5	8	7	8	2	7	2	5
Bhlhe22	0	1	0	0	0	0	0	0	0	0	0	0	0	0	0	0	0	0	0	0	0	0	0
Bhlhe40	2	60	103	127	145	143	122	255	144	351	41	9	43	57	151	98	129	94	124	58	94	31	139
Bhlhe41	0	0	0	0	0	0	0	0	0	0	0	0	0	0	0	0	0	0	0	0	0	0	0
Bhmt	0	0	0	0	0	0	0	0	0	0	0	0	0	0	0	1	0	0	1	0	0	0	0
Bicc1	0	0	0	0	0	0	0	0	0	0	0	0	0	0	0	0	0	0	0	0	0	0	0
Bicd1	0	0	1	3	0	0	1	4	1	11	2	3	0	0	1	0	1	3	2	0	2	1	5
Bicd2	2	5	1	1	7	9	5	5	2	3	1	6	5	3	6	7	9	3	4	0	5	3	4
Bicdl1	0	6	5	4	27	12	2	5	3	5	2	25	9	5	14	11	16	6	5	5	4	3	11
Bicra	0	2	4	3	7	7	2	5	1	5	0	13	1	4	6	8	11	4	1	4	3	2	5
Bicral	0	0	5	3	6	5	0	7	5	5	1	3	0	1	2	0	5	1	3	2	3	1	1
Bid	1	4	14	14	18	19	13	13	7	20	5	21	6	2	17	10	20	7	3	4	5	4	12
Bik	0	2	1	2	5	5	0	6	0	4	2	3	2	2	2	1	5	0	2	0	0	0	0
Bin1	0	19	46	32	66	54	12	36	31	49	7	65	22	21	59	33	76	27	31	19	23	5	40
Bin2	6	122	176	187	331	286	97	169	104	188	44	301	103	149	343	215	299	166	193	112	142	58	265
Bin3	1	15	29	22	32	28	12	12	15	21	2	46	6	22	36	23	49	10	30	9	23	5	25
Birc2	0	8	12	10	19	18	5	10	6	10	1	17	4	9	10	11	13	4	5	4	7	2	7
Birc3	0	6	10	7	9	18	6	7	2	9	3	17	2	12	11	7	14	7	7	2	15	5	15
Birc5	0	0	0	1	2	2	0	1	4	2	0	0	0	2	2	0	2	1	0	0	1	0	2
Birc6	0	9	26	23	31	34	8	17	6	22	2	34	10	11	24	12	26	5	27	11	11	4	16
Bivm	0	1	0	3	0	1	0	1	1	2	0	3	0	3	0	1	8	0	2	2	2	0	3
Blcap	0	1	6	4	3	6	3	4	4	10	1	8	0	6	8	4	12	3	6	3	4	2	2
Blk	0	0	0	0	0	0	0	0	0	0	0	2	0	0	0	2	0	0	0	0	0	0	0
Blm	0	1	1	6	6	3	3	2	2	4	0	7	1	0	3	1	8	1	3	1	2	0	1
Blmh	0	7	10	8	27	17	8	17	14	17	1	24	10	8	27	12	16	12	8	8	8	1	21
Blnk	0	0	0	1	0	3	1	0	0	0	0	2	2	3	3	1	4	3	10	1	5	5	7
Bloc1s1	1	41	64	62	99	74	38	74	39	74	7	106	25	47	107	68	87	38	51	30	40	19	77
Bloc1s2	0	14	22	20	30	36	16	26	13	36	4	31	17	23	30	42	40	25	24	12	25	4	30
Bloc1s2-ps	0	2	5	3	7	5	1	1	1	7	0	6	0	4	5	3	5	4	4	1	3	1	1
Bloc1s3	0	1	0	1	1	1	0	0	1	2	0	1	1	1	0	1	4	2	0	0	2	1	0
Bloc1s4	2	6	5	7	8	4	0	7	2	7	1	7	3	2	10	2	8	3	9	5	2	2	5
Bloc1s5	0	4	7	5	5	5	3	7	3	5	1	14	1	2	8	5	12	8	0	4	3	0	6
Bloc1s6	0	7	9	14	24	11	7	20	6	19	1	20	2	9	15	11	31	5	8	2	12	5	13
Bloc1s6os	0	2	0	0	5	2	0	2	0	3	1	2	0	1	0	1	0	1	1	1	2	1	2
Blvra	1	9	18	17	30	23	14	26	14	25	4	32	12	16	30	14	27	18	23	13	15	6	24
Blvrb	1	2	1	1	5	1	1	0	1	2	1	9	3	7	8	3	1	3	1	1	4	1	7
Blzf1	1	5	4	3	8	11	2	2	3	5	0	5	0	4	3	3	4	2	3	3	3	2	5
Bmf	0	0	3	0	2	1	0	1	0	0	0	2	1	0	0	1	0	0	1	1	1	0	2
Bmi1	1	0	0	3	3	2	7	5	2	4	0	5	3	1	3	1	4	4	3	2	3	0	8
Bmp2	0	0	0	2	1	0	0	0	0	0	0	0	0	0	1	1	0	0	0	0	1	0	0
Bmp2k	0	2	1	1	1	3	0	3	0	3	1	5	1	1	2	3	3	1	2	1	1	2	3
Bmp6	0	0	0	0	1	0	0	0	0	0	0	0	0	0	0	0	0	0	0	0	0	0	0
Bmp7	1	5	1	4	0	1	0	2	0	3	0	5	3	1	1	1	1	2	1	3	5	0	2
Bmp8a	0	0	0	0	0	0	0	3	0	0	0	0	0	0	0	0	0	0	0	0	0	0	0
Bmper	0	0	0	0	0	0	0	0	0	0	0	0	0	0	0	0	0	0	0	0	0	0	0
Bmpr1a	0	2	0	0	0	2	0	0	0	1	0	2	0	0	1	0	0	0	0	0	1	1	0
Bmpr2	0	0	0	0	0	0	0	0	0	2	0	1	1	0	0	0	0	0	0	0	1	0	0
Bms1	2	13	8	16	26	31	7	21	13	20	4	30	5	22	26	17	34	11	10	13	21	4	20
Bmt2	0	1	2	2	2	4	1	2	1	0	1	1	1	0	1	4	2	2	3	1	3	0	0
Bmyc	0	5	9	19	29	18	0	2	1	6	0	39	11	15	22	22	38	11	15	8	13	6	20
Bnip1	0	4	7	5	8	5	3	5	1	1	1	8	3	4	4	6	3	2	1	4	4	3	3
Bnip2	0	18	26	21	42	30	16	31	19	31	5	40	16	21	27	24	33	21	26	10	21	2	26
Bnip3	0	0	2	1	5	2	1	1	0	0	0	3	0	0	5	2	5	2	2	0	3	1	0
Bnip3l	1	19	23	27	34	32	13	26	15	27	1	50	15	18	28	29	39	16	22	12	15	10	39
Bnip3l-ps	0	3	2	3	3	8	8	5	2	7	0	9	2	7	6	7	3	2	3	4	5	2	6
Bnipl	0	0	0	0	0	0	0	0	0	0	0	0	0	0	0	0	0	0	0	0	0	0	0
Bod1	0	1	1	1	2	1	1	1	1	2	0	4	1	0	5	4	1	0	0	0	2	0	1
Bod1l	3	9	22	24	24	21	15	17	12	13	2	38	16	14	26	8	30	14	15	15	17	2	22
Bola1	0	5	13	6	15	11	8	11	1	5	2	30	4	9	8	11	16	6	11	3	7	3	14
Bola2	3	54	77	70	132	98	26	49	31	52	11	152	37	61	93	78	107	71	47	28	48	23	67
Bola3	1	15	39	29	50	41	14	25	21	49	4	46	16	28	27	26	47	20	32	12	20	8	31
Boll	0	0	0	0	0	0	0	0	0	0	0	0	0	0	0	0	0	0	0	0	0	0	0
Bop1	2	11	21	28	34	24	9	16	10	25	6	28	9	10	30	15	31	17	27	17	12	4	31
Bora	0	0	2	1	1	2	2	6	1	8	0	1	2	2	4	1	6	2	0	1	2	0	1
Borcs5	0	4	10	6	7	8	0	4	2	10	1	10	3	12	18	6	9	6	3	1	4	3	5
Borcs6	0	2	1	3	3	7	0	2	2	5	1	7	0	1	1	2	2	1	2	1	3	3	0
Borcs7	1	3	9	10	13	21	6	9	7	9	3	22	1	6	11	14	10	10	12	7	9	4	19
Borcs8	0	13	20	21	38	19	13	19	13	25	2	23	7	11	23	20	25	16	17	16	8	6	19
Bpgm	2	10	7	5	16	11	4	7	7	13	10	17	12	12	12	8	17	8	14	3	3	5	5
Bphl	2	3	1	3	8	4	0	0	0	1	1	5	0	2	4	3	5	2	0	0	2	0	2
Bpnt1	0	3	1	1	9	8	0	1	0	2	0	4	2	4	6	2	3	5	7	4	8	0	1
Bptf	0	12	25	23	23	24	22	21	6	16	6	36	6	19	20	18	30	13	11	12	19	5	14
Braf	0	0	2	2	2	1	0	3	1	0	0	1	0	2	1	2	2	4	0	2	0	0	1
Brap	0	6	13	7	13	12	5	4	5	6	2	11	7	4	8	9	13	5	8	4	2	0	12
Brat1	0	5	7	13	9	3	3	2	1	4	0	15	6	4	4	5	12	5	12	4	4	1	12
Brca1	1	0	0	1	0	1	0	2	1	2	0	0	0	0	1	0	1	0	2	1	0	0	0
Brca2	0	0	1	1	1	3	1	2	1	1	0	2	1	1	3	1	1	2	3	0	0	0	2
Brcc3	2	10	24	27	44	32	14	22	9	39	2	30	10	16	28	26	34	20	22	17	28	8	22
Brd1	0	4	6	8	6	5	1	6	1	5	0	3	2	4	2	5	4	2	5	3	10	1	2
Brd2	3	49	66	43	86	79	49	73	33	61	15	69	48	49	78	70	76	41	51	37	45	12	71
Brd3	2	10	23	25	21	23	11	20	10	10	2	38	11	19	25	15	30	13	26	10	14	7	29
Brd3os	0	0	0	0	0	0	0	0	0	0	0	1	0	0	0	0	0	0	0	0	0	0	0
Brd4	2	9	16	12	32	27	9	22	14	25	4	31	13	18	25	21	36	16	30	13	13	3	24
Brd7	0	8	19	8	27	17	6	13	4	8	1	31	3	7	23	10	15	12	9	12	4	0	13
Brd8	2	10	27	22	23	16	12	32	12	18	3	31	10	19	24	21	27	10	23	12	13	8	24
Brd9	0	17	17	25	44	41	6	29	15	30	7	47	17	17	36	23	40	19	17	9	26	4	25
Brdt	0	0	0	0	0	0	0	0	0	0	0	0	0	0	0	2	0	0	0	0	0	0	0
Brf1	0	8	7	14	12	23	1	7	3	10	3	16	3	5	15	12	21	4	7	3	8	1	6
Brf2	0	1	4	4	7	5	2	1	2	9	2	3	1	4	8	1	5	5	2	0	4	2	9
Bri3	0	2	0	3	2	5	2	4	3	4	2	5	0	1	4	3	2	1	2	1	0	0	3
Bri3bp	0	3	10	11	17	9	4	5	0	7	1	9	11	8	14	5	20	9	15	6	8	3	14
Brip1	0	0	1	0	0	0	0	1	0	0	0	1	0	0	1	0	0	0	0	1	0	0	2
Brip1os	0	4	4	7	4	5	5	7	5	6	4	9	0	3	6	3	4	2	5	0	2	1	1
Brix1	3	18	31	23	37	35	13	21	12	31	2	50	11	23	38	27	39	14	19	18	25	8	29
Brk1	6	35	73	55	102	79	36	63	48	61	15	103	29	45	78	58	106	44	58	42	46	29	72
Brms1	1	20	30	23	38	32	11	21	15	33	5	37	11	16	39	24	43	23	22	14	12	10	27
Brms1l	0	1	3	4	2	7	0	4	1	1	0	9	1	2	5	1	10	2	1	0	3	0	2
Brox	0	4	7	7	7	11	2	7	3	8	0	6	0	3	3	2	4	3	6	0	4	1	8
Brpf1	0	7	5	5	8	8	12	4	0	8	0	5	2	5	2	5	9	5	5	4	3	4	4
Brpf3	0	0	1	0	0	0	0	1	0	0	0	1	0	0	3	1	1	0	0	0	0	0	1
Brwd1	0	6	13	15	10	19	8	4	5	11	2	24	4	13	11	9	9	8	10	3	9	2	11
Brwd3	0	2	5	1	5	4	0	3	1	4	0	6	3	5	6	4	6	0	4	2	6	3	8
Bscl2	2	37	59	56	113	72	27	61	41	51	11	84	20	44	104	62	74	48	52	23	46	12	56
Bsdc1	0	4	7	11	17	14	5	9	4	12	1	12	7	8	8	12	11	8	12	7	8	2	8
Bsg	4	39	86	73	146	85	29	64	37	76	13	144	37	54	114	97	110	60	70	46	71	23	81
Bsn	0	0	1	0	3	1	0	0	0	0	0	1	0	0	0	0	0	0	1	0	1	0	2
Bspry	1	1	0	2	2	1	1	3	1	1	2	3	0	0	2	1	1	1	0	1	1	0	0
Bst1	0	0	0	0	0	2	0	0	0	0	0	1	0	0	0	1	1	0	0	0	0	0	0
Bst2	2	16	27	37	73	114	20	28	14	39	4	61	38	69	76	68	151	80	79	38	42	28	110
Btaf1	2	0	2	2	8	13	3	5	3	6	2	13	3	6	6	4	7	3	5	7	6	1	5
Btbd1	0	2	9	9	13	12	7	8	4	10	0	16	2	2	8	9	7	6	9	1	7	0	8
Btbd10	1	6	6	4	10	8	6	14	9	12	2	11	3	5	10	9	9	4	9	4	2	2	17
Btbd11	2	6	2	4	10	3	4	6	2	6	2	3	4	3	4	2	3	4	4	2	3	1	2
Btbd16	0	0	0	1	0	3	2	0	1	1	0	1	0	0	0	0	0	0	0	0	0	0	0
Btbd19	0	0	3	4	1	1	0	1	2	1	0	1	1	1	2	1	0	0	0	0	1	2	1
Btbd2	0	2	3	2	1	2	0	1	0	1	0	6	3	1	4	4	4	0	0	1	2	0	0
Btbd3	0	0	0	0	0	1	0	0	0	0	0	0	0	1	0	0	0	0	0	0	0	0	0
Btbd6	0	4	5	6	10	14	6	8	3	5	0	15	4	5	12	3	6	7	3	5	4	4	13
Btbd7	0	2	12	5	8	9	5	7	4	4	4	19	3	8	6	12	18	7	8	8	10	4	8
Btbd8	0	1	0	1	2	1	2	3	4	2	0	2	1	0	3	0	1	3	1	2	2	1	2
Btbd9	1	16	33	20	13	31	20	11	15	26	4	23	13	24	16	13	38	14	15	7	18	5	24
Btc	0	0	0	0	2	1	0	0	0	0	0	1	0	0	0	0	1	0	0	0	0	0	0
Btd	0	4	6	10	10	12	1	4	2	5	1	10	3	3	12	1	4	5	4	3	1	0	5
Btf3	4	50	83	65	144	96	41	61	45	73	14	111	46	70	88	84	137	75	63	49	41	20	93
Btf3l4	0	2	2	4	6	7	1	1	1	0	0	2	3	0	2	1	4	0	1	3	1	0	2
Btg1	4	42	83	82	77	97	63	106	29	88	21	52	33	48	81	52	78	46	67	37	45	21	77
Btg2	8	109	236	218	275	263	80	155	83	168	38	88	89	104	252	156	249	111	140	101	140	32	164
Btg3	0	0	1	2	3	3	2	3	3	6	1	3	0	1	1	1	1	1	2	1	1	1	2
Btk	0	0	0	0	0	1	0	0	1	3	0	1	1	1	2	1	1	1	1	1	0	0	0
Btla	0	2	6	1	12	9	0	2	0	1	0	11	2	2	4	4	7	2	3	2	5	0	4
Btnl1	0	0	0	0	0	0	0	0	0	0	0	0	0	0	0	0	1	0	0	0	0	0	0
Btnl2	0	0	0	0	0	0	0	0	0	0	0	0	0	0	0	0	0	0	0	0	0	0	0
Btnl9	0	0	0	0	3	0	0	0	0	0	0	0	1	0	0	0	0	0	0	0	0	0	0
Btrc	0	2	4	3	4	5	2	3	1	7	1	4	1	1	3	3	3	3	0	0	3	2	1
Bub1	0	0	0	0	0	0	0	0	0	0	0	0	0	0	0	0	0	0	0	0	0	0	0
Bub1b	0	0	0	1	0	5	0	1	0	3	0	0	0	0	0	0	0	0	0	0	0	0	0
Bub3	3	23	45	44	71	40	34	50	31	66	7	82	25	36	52	34	69	34	44	31	42	11	43
Bud13	1	2	6	7	10	7	2	3	1	11	0	8	2	11	7	5	4	2	6	6	8	4	6
Bud23	1	18	25	23	37	17	8	23	6	21	5	40	14	16	34	15	31	21	22	17	8	4	25
Bud31	1	22	25	26	48	35	13	31	10	39	1	43	21	21	34	30	34	16	23	13	25	7	30
Bvht	0	0	0	0	1	2	0	0	0	0	0	0	0	0	0	0	0	0	0	0	0	0	0
Bysl	0	4	17	7	24	18	3	8	5	10	2	15	3	12	19	9	21	7	7	7	8	0	10
Bzw1	3	30	68	71	100	99	29	62	57	106	12	101	39	44	93	61	94	59	61	35	55	21	93
Bzw2	7	40	71	59	116	87	24	50	22	34	9	164	40	54	111	65	135	53	63	62	60	24	85
C030005K06Rik	0	0	0	0	0	1	0	0	1	0	0	0	0	0	0	0	0	0	1	0	0	0	1
C030006K11Rik	0	2	7	6	22	7	1	3	2	6	2	24	5	4	6	7	18	5	4	5	7	3	8
C030010L15Rik	0	0	0	0	0	0	1	0	0	0	0	0	0	0	0	0	0	0	0	0	0	0	0
C030013C21Rik	0	0	0	0	0	1	0	0	0	0	0	0	0	0	1	0	0	0	0	0	0	0	0
C030014I23Rik	0	0	0	0	0	0	0	0	0	0	0	0	0	0	0	0	0	0	0	0	0	0	0
C030015A19Rik	0	0	0	0	1	0	0	0	1	0	0	0	0	0	0	1	0	0	0	0	0	0	0
C030017G13Rik	0	0	0	0	0	0	0	0	0	0	0	0	0	0	0	0	0	0	0	0	0	0	0
C030018K13Rik	0	0	0	0	0	0	0	0	0	0	0	0	0	0	0	0	0	0	0	0	0	0	0
C030029H02Rik	0	0	0	0	0	0	0	0	0	0	0	2	0	0	0	0	0	0	0	0	0	0	0
C030034I22Rik	0	5	3	3	8	9	4	4	3	7	0	13	2	6	10	5	13	3	3	1	4	2	6
C030034L19Rik	0	2	1	1	0	1	0	0	0	0	0	0	0	0	1	1	1	0	1	0	0	0	1
C030037D09Rik	0	0	0	0	1	0	0	0	1	0	0	0	0	0	0	0	0	0	0	0	1	0	3
C130013H08Rik	0	1	0	0	0	2	0	0	1	1	0	1	0	0	0	0	0	0	0	0	0	0	0
C130023A14Rik	0	0	0	0	0	0	0	0	0	0	0	0	0	0	0	0	0	0	0	0	0	0	0
C130026I21Rik	0	1	3	2	1	5	1	2	1	6	0	4	0	0	0	4	4	2	1	0	2	1	10
C130030K03Rik	0	0	0	1	0	0	0	0	0	0	0	0	0	0	0	0	0	0	0	0	0	0	0
C130036L24Rik	0	0	1	2	1	1	1	2	0	2	0	1	0	0	1	1	4	0	2	0	1	1	1
C130046K22Rik	0	1	0	0	0	0	0	0	0	0	0	0	0	0	0	0	0	0	0	0	0	0	0
C130051F05Rik	0	1	0	0	2	0	0	0	0	0	0	3	0	0	0	0	0	0	0	0	0	0	0
C130060C02Rik	0	0	0	1	0	0	0	0	0	0	0	0	0	0	0	0	0	0	0	0	0	0	0
C130073E24Rik	0	0	0	0	0	0	0	0	0	0	0	0	1	0	0	0	0	0	0	0	0	0	1
C130083A15Rik	0	0	0	0	0	0	0	0	0	0	0	0	0	1	0	0	0	0	0	0	0	0	1
C130089K02Rik	0	0	0	0	0	0	0	0	0	0	0	1	0	0	0	0	0	0	0	1	0	0	0
C1d	1	8	17	17	32	18	9	21	15	31	2	46	6	14	28	27	31	22	17	9	8	3	16
C1galt1	0	1	0	6	1	1	0	5	0	4	1	2	3	1	5	1	0	2	1	1	0	0	0
C1galt1c1	0	2	6	5	5	4	1	7	10	5	0	7	5	4	10	5	8	4	5	0	4	4	8
C1qa	0	0	0	0	0	1	3	1	0	0	0	0	0	0	0	0	0	0	0	0	0	0	0
C1qb	0	1	0	0	2	0	1	1	0	0	0	1	0	1	2	0	0	0	1	0	0	0	0
C1qbp	0	24	39	40	74	54	15	33	14	26	5	73	31	30	53	34	48	43	35	28	36	11	54
C1qc	0	0	0	0	3	0	0	0	0	1	0	1	1	0	0	0	0	0	0	0	0	1	0
C1ql2	0	0	1	0	0	0	0	0	0	0	0	0	0	0	0	0	0	0	0	0	0	0	0
C1qtnf1	0	0	0	0	0	0	0	0	0	0	0	1	0	0	0	0	0	0	0	0	0	0	0
C1qtnf12	0	0	1	1	0	1	0	1	0	0	0	4	0	0	1	1	0	0	2	0	0	0	1
C1qtnf4	0	0	4	1	1	2	2	1	3	3	1	10	1	0	1	2	7	2	1	2	3	2	4
C1qtnf6	0	2	3	0	2	1	1	3	3	7	1	5	0	0	5	6	4	3	0	1	3	1	1
C1qtnf9	0	0	0	0	0	0	0	0	0	1	0	0	0	0	0	0	0	0	1	1	0	0	0
C1ra	0	0	0	0	0	0	0	0	0	0	0	0	0	0	0	0	0	0	0	0	0	0	0
C2	0	0	0	2	0	0	0	0	0	0	0	0	0	0	0	0	0	0	0	0	0	0	0
C230024C17Rik	0	3	2	0	2	3	2	4	1	2	0	0	0	0	2	0	0	0	1	0	4	0	3
C230037L18Rik	1	1	1	2	2	2	0	0	0	2	1	4	1	0	0	4	4	0	1	0	1	0	1
C230038L03Rik	0	0	0	0	0	2	0	0	0	1	0	0	0	0	0	0	1	0	0	0	1	0	1
C230053D17Rik	0	0	0	0	0	0	1	0	0	0	0	0	0	0	0	0	0	0	0	0	0	0	0
C230062I16Rik	0	1	0	2	0	0	0	3	0	0	0	2	0	2	0	0	0	0	0	0	0	1	2
C230066G23Rik	0	1	1	0	1	2	0	0	1	0	0	3	0	0	1	0	0	3	1	0	1	0	1
C230071H17Rik	0	0	0	0	0	0	0	0	0	0	0	0	0	0	0	0	0	0	0	0	0	0	0
C230085N15Rik	0	3	2	2	4	6	1	0	1	2	0	6	1	2	8	0	5	2	2	1	2	1	4
C230096K16Rik	0	3	5	8	9	5	2	4	1	1	4	2	5	7	10	7	8	3	5	4	5	5	5
C2cd2	0	1	2	4	11	2	0	1	3	5	0	4	1	4	3	3	4	2	2	0	1	2	1
C2cd2l	0	0	4	0	3	0	0	3	0	1	0	2	0	1	1	1	1	0	1	0	6	0	2
C2cd3	0	5	8	8	2	4	1	7	3	7	0	6	3	3	5	6	9	4	5	3	4	1	6
C2cd4b	0	0	3	1	0	0	0	0	1	0	0	0	0	1	0	0	0	0	0	1	1	0	0
C2cd5	0	6	4	3	12	9	5	9	2	7	0	7	3	4	10	6	10	1	5	4	2	1	7
C3	0	0	0	0	1	1	0	0	0	0	0	0	0	0	1	1	0	0	0	0	0	0	0
C330007P06Rik	1	1	4	1	4	7	2	2	3	8	3	4	2	3	5	11	4	3	6	0	6	0	6
C330011M18Rik	0	1	5	0	3	2	0	0	1	1	0	1	0	2	0	0	1	1	1	1	1	0	2
C330013E15Rik	0	0	0	3	1	2	0	2	0	0	1	0	0	0	2	0	3	0	0	0	0	0	0
C330018D20Rik	0	1	7	4	7	1	3	4	1	10	0	5	6	2	6	3	11	6	2	2	5	0	6
C430002N11Rik	0	0	1	1	0	1	0	1	0	0	0	1	0	1	0	0	0	2	0	0	0	0	0
C430014B12Rik	0	0	0	0	0	0	0	0	0	0	0	0	0	0	0	0	0	0	0	0	1	0	0
C430019N01Rik	0	1	1	0	0	2	0	0	1	1	0	1	1	1	0	0	3	0	0	0	1	0	0
C430039J01Rik	0	0	0	0	0	0	0	0	0	0	0	0	0	0	0	0	0	0	0	0	0	0	0
C430042M11Rik	0	0	0	2	1	0	0	0	0	0	0	1	0	0	0	0	0	0	0	0	0	0	0
C430049B03Rik	0	0	0	0	0	0	0	0	0	0	0	0	0	0	0	0	0	0	0	0	0	0	0
C4a	0	0	0	1	0	1	0	0	0	0	0	0	1	0	0	0	0	0	0	0	0	0	0
C4bp	0	0	0	0	0	0	0	0	0	0	0	0	0	0	0	0	1	0	0	0	0	0	0
C530005A16Rik	0	0	1	0	0	1	0	2	0	0	0	2	0	0	0	0	1	0	1	1	1	0	2
C530008M17Rik	0	0	0	0	0	0	0	0	0	0	0	2	0	0	0	0	0	0	1	1	0	0	0
C530044C16Rik	0	0	0	0	0	0	0	0	0	0	0	0	0	0	0	0	0	0	0	0	0	0	0
C530050E15Rik	0	1	0	0	3	0	1	1	1	0	0	0	0	5	0	0	3	1	1	1	0	0	0
C5ar2	0	0	0	0	0	0	0	0	0	0	0	0	0	0	0	0	0	0	0	0	0	0	0
C6	0	0	0	0	0	0	0	0	0	0	0	0	0	0	0	0	0	0	0	0	0	0	0
C630004M23Rik	0	0	0	1	0	0	1	0	1	0	0	3	0	0	0	0	2	0	0	1	0	0	0
C630043F03Rik	0	0	0	1	0	0	0	0	0	0	0	0	0	0	1	1	0	0	0	0	0	0	0
C730034F03Rik	0	1	3	5	7	8	3	6	6	5	0	4	5	3	7	3	10	4	5	5	2	1	4
C730045M19Rik	0	0	1	0	0	0	0	0	0	1	0	0	0	0	0	0	0	0	2	0	0	0	0
C78859	0	0	0	0	0	0	0	1	0	0	0	0	0	0	0	0	0	0	0	0	0	0	0
C79130	0	0	0	0	0	0	0	0	0	0	0	0	0	0	0	0	0	0	0	0	1	0	0
C87436	0	6	7	14	13	11	2	7	7	16	4	12	5	10	7	5	6	3	7	2	7	1	7
C8a	1	0	0	0	0	0	0	0	0	0	0	0	0	0	0	0	0	0	0	0	0	0	0
C8g	0	1	0	0	0	0	0	0	0	1	0	1	0	1	0	0	0	0	0	0	0	0	0
C9	0	0	0	0	0	0	0	0	0	0	0	0	0	0	0	0	0	0	0	0	0	0	0
C920006O11Rik	0	1	1	0	5	2	0	1	0	2	0	6	0	2	5	7	0	0	2	0	0	1	0
C920009B18Rik	0	4	7	10	10	9	12	6	9	25	3	5	2	3	6	7	7	6	9	5	2	0	8
C920021L13Rik	0	1	0	0	1	1	0	0	0	0	0	2	0	0	0	0	0	0	0	1	0	0	0
C9orf72	0	1	2	1	2	3	1	1	0	0	0	3	0	3	2	1	2	0	1	0	0	0	2
CAAA01141682.1	0	0	1	2	1	1	1	0	1	1	0	2	0	0	0	0	2	1	0	0	3	0	1
CAAA01141682.2	0	1	0	1	0	0	1	0	0	1	0	0	0	0	0	0	0	0	0	0	0	0	0
CT009567.1	0	0	0	0	0	0	0	0	0	0	0	0	0	0	0	0	0	0	0	0	0	0	1
CT009577.1	0	0	0	0	0	0	0	0	0	0	0	1	0	0	0	0	0	0	0	0	0	0	0
CT009580.2	0	0	1	0	2	2	1	0	0	2	0	3	0	2	0	0	2	0	1	0	0	0	3
CT009627.3	0	0	0	0	0	1	0	1	0	1	0	2	0	1	1	1	1	3	0	0	1	0	0
CT009635.5	0	0	0	0	0	0	0	0	0	0	0	0	0	0	0	0	0	0	0	0	0	0	1
CT009715.1	0	0	0	0	0	0	0	0	0	0	0	0	0	0	1	0	0	0	0	0	0	0	0
CT009718.1	0	0	0	0	0	0	0	1	0	0	0	0	0	0	0	0	0	0	0	0	0	0	0
CT009736.1	0	0	1	0	0	0	0	0	0	0	0	0	0	0	0	0	0	0	0	0	0	0	0
CT009755.1	1	2	4	3	2	7	1	6	6	7	0	6	1	3	1	2	5	3	4	4	2	0	6
CT010429.1	0	0	0	0	0	0	0	0	0	0	0	0	0	0	0	0	0	0	0	0	0	0	0
CT010433.1	0	0	0	0	0	0	0	0	0	0	0	0	0	0	0	1	0	0	0	0	0	0	0
CT010433.2	0	0	0	0	0	0	0	0	0	0	0	0	0	1	0	0	3	0	0	0	0	0	1
CT010437.1	0	0	0	0	0	0	0	0	0	0	0	0	0	0	0	0	1	0	0	0	0	0	0
CT010445.1	0	0	0	0	0	0	0	0	0	0	0	0	0	0	1	0	0	0	0	0	0	0	0
CT010467.1	2	6	42	34	45	62	16	4	10	16	6	39	16	13	23	36	35	17	24	11	14	5	16
CT010490.1	0	0	0	0	0	0	0	0	0	0	0	0	0	0	0	0	0	0	0	0	0	0	0
CT010490.2	0	0	0	0	1	1	0	1	0	2	0	0	0	0	0	1	1	2	0	0	0	0	0
CT010524.1	0	0	0	1	0	0	0	0	0	0	0	0	0	0	1	0	0	0	0	0	0	0	0
CT010565.1	0	2	4	1	4	5	2	2	0	2	0	3	0	4	7	4	2	3	3	0	5	1	0
CT010565.2	0	0	0	0	0	0	0	0	0	0	0	0	0	0	0	0	0	0	0	0	0	0	0
CT010583.2	0	0	0	0	0	0	1	0	0	0	1	0	0	0	0	0	0	0	0	0	0	0	0
CT025521.2	0	0	0	0	0	0	0	0	0	0	0	1	0	0	0	0	0	0	0	0	0	0	0
CT025522.3	0	1	0	0	0	0	0	0	0	0	0	0	0	0	0	0	0	0	0	0	1	0	0
CT025573.1	0	0	0	0	0	0	0	0	0	0	0	0	0	0	0	0	0	0	0	0	0	0	0
CT025592.1	0	0	0	0	0	0	0	0	0	0	0	1	0	0	0	0	0	0	0	0	0	0	0
CT025601.1	0	3	8	12	10	7	4	6	6	10	2	14	6	8	5	11	10	8	4	5	9	1	9
CT025652.2	0	0	0	0	0	0	0	0	0	0	0	0	0	0	0	0	0	0	0	1	0	0	0
CT025659.1	0	0	0	0	0	0	0	0	0	0	0	0	0	0	0	0	0	0	0	0	0	0	0
CT025659.2	0	0	0	1	0	0	0	1	0	0	0	0	0	1	1	0	2	0	0	0	0	0	0
CT025659.3	0	0	0	1	0	1	0	0	0	0	0	0	0	2	0	0	2	0	0	0	1	0	0
CT025731.2	0	0	0	0	0	0	0	0	0	0	0	0	0	0	0	0	0	0	0	0	0	0	0
CT025753.1	0	0	0	1	0	0	0	0	0	0	0	0	0	0	0	0	1	0	0	0	0	0	0
CT025753.2	0	0	0	0	0	0	0	0	0	0	0	0	0	0	0	0	0	0	0	0	0	0	0
CT025867.1	0	0	0	0	1	0	0	0	0	1	0	0	0	0	0	0	0	0	1	0	0	0	0
CT030636.1	0	0	0	0	2	1	1	0	0	0	0	0	0	0	0	1	0	0	0	0	0	0	0
CT030665.1	0	1	0	0	1	0	0	2	2	0	0	1	0	3	3	0	3	1	2	1	0	0	3
CT030713.2	0	1	4	1	2	3	0	0	1	7	0	1	0	0	2	2	5	0	0	0	0	1	1
CT033749.1	2	11	26	30	29	27	22	26	14	40	4	40	5	24	23	33	46	20	21	18	10	4	30
CT033750.1	0	1	3	1	3	0	1	0	1	2	1	11	2	2	2	0	3	1	3	1	0	0	3
CT033776.1	0	0	0	0	2	1	3	1	0	1	0	0	1	0	1	1	0	0	0	1	1	0	0
CT571242.2	0	0	0	0	0	0	0	0	0	0	0	0	0	0	0	0	0	0	0	1	0	0	0
CT571247.2	0	0	0	1	0	1	0	1	0	2	0	1	0	0	0	0	1	0	0	1	0	0	0
Caap1	0	4	2	4	4	4	1	2	2	2	0	5	1	3	4	3	7	2	3	0	1	1	1
Cab39	0	5	12	10	16	10	9	6	6	7	5	18	2	10	9	9	21	6	6	7	8	3	6
Cab39l	5	12	8	7	16	11	8	18	4	9	1	24	6	6	16	13	15	6	9	2	11	4	14
Cabcoco1	0	0	0	0	1	0	0	0	0	0	0	1	0	0	0	0	0	0	1	1	0	0	0
Cabin1	2	9	27	29	41	30	8	20	9	16	2	34	6	16	34	18	30	20	13	15	10	4	19
Cables1	0	0	0	1	0	0	1	0	3	0	0	0	0	0	1	0	0	1	2	0	0	1	2
Cables2	0	0	3	3	1	2	0	2	1	1	0	3	0	1	2	2	2	0	0	0	1	1	3
Cabp1	0	0	0	0	0	0	1	0	0	0	0	0	0	0	0	0	0	0	0	0	0	0	0
Cabp4	0	0	0	0	0	0	0	0	0	0	0	0	0	0	0	0	0	0	0	0	0	0	0
Cabyr	0	0	1	1	0	0	1	0	0	1	0	1	0	0	1	0	0	0	0	1	0	0	0
Cacfd1	0	7	11	15	22	13	8	13	5	5	1	15	6	8	14	3	11	7	7	10	5	2	7
Cacna1a	0	0	0	0	2	0	0	0	1	0	0	1	0	1	0	2	0	2	2	0	0	0	0
Cacna1d	0	0	0	0	0	0	1	0	0	1	0	0	1	0	0	0	0	0	1	2	2	0	2
Cacna1e	0	0	0	0	0	1	0	0	0	0	0	0	1	0	0	0	0	0	0	1	0	0	1
Cacna1f	0	0	0	0	2	0	0	0	0	0	0	0	0	0	0	0	0	0	0	0	0	0	0
Cacna1g	0	0	0	0	0	0	0	0	0	0	0	0	0	0	0	0	0	0	0	0	0	0	0
Cacna1i	0	0	0	0	0	0	0	0	0	0	0	0	0	0	0	0	0	0	0	0	0	0	0
Cacna1s	0	0	0	2	0	0	0	0	0	0	0	1	0	0	0	0	0	1	0	0	0	2	0
Cacna2d1	0	0	0	0	0	0	0	0	0	0	0	0	0	0	0	0	0	0	0	1	0	0	0
Cacna2d2	0	1	0	0	1	0	0	0	0	0	0	2	0	1	1	1	2	1	1	0	0	0	0
Cacna2d4	0	1	0	0	6	0	0	1	1	0	0	4	1	0	7	5	1	1	1	1	1	0	3
Cacnb1	0	2	0	3	1	1	0	0	0	0	0	0	0	0	3	1	1	0	1	1	1	0	0
Cacnb3	0	0	0	0	0	0	0	0	0	0	0	2	0	0	0	0	0	0	0	0	0	0	0
Cacnb4	0	0	0	0	0	0	0	0	0	0	0	1	0	0	0	0	0	1	1	0	0	0	0
Cacng8	0	0	0	0	2	1	0	0	0	1	0	4	0	0	0	0	2	0	0	1	3	0	1
Cactin	1	4	11	6	8	10	3	8	1	4	2	11	2	4	8	7	10	2	3	4	6	0	7
Cacul1	1	2	3	5	6	4	1	7	3	5	1	10	1	1	2	2	8	3	5	1	4	1	5
Cacybp	0	38	51	36	66	55	26	45	29	43	7	60	27	37	70	33	57	35	53	21	44	18	62
Cad	0	2	1	2	6	3	1	0	1	1	1	11	1	2	4	4	7	1	6	3	6	0	10
Cadm1	0	0	0	0	0	1	0	1	0	0	0	5	0	1	0	0	1	3	0	0	1	1	3
Cadm3	0	0	0	0	0	0	0	0	0	0	0	0	0	0	0	0	0	0	0	0	0	0	0
Cage1	0	3	6	3	7	7	0	2	3	3	1	3	1	4	7	4	7	4	6	1	4	1	2
Calca	0	1	0	0	1	0	1	4	0	5	0	0	0	0	0	1	0	0	0	0	0	0	1
Calcb	0	0	0	0	1	0	0	0	0	2	0	0	0	0	0	0	0	0	1	0	0	0	0
Calcoco1	0	1	10	10	3	8	2	7	6	11	2	8	9	4	10	11	14	4	8	2	2	1	12
Calcrl	0	3	2	1	4	3	3	3	1	1	0	4	0	1	1	2	3	0	1	0	0	2	2
Cald1	0	0	0	0	0	0	0	0	0	1	0	0	0	2	0	0	0	0	0	0	0	0	0
Calhm2	0	1	8	4	4	5	4	10	6	6	2	8	1	3	5	4	9	3	9	3	2	0	4
Calhm5	0	0	0	0	1	1	0	0	0	1	0	0	0	1	1	0	1	0	0	1	1	0	0
Calhm6	1	8	14	10	27	11	8	13	8	15	2	35	7	8	19	8	16	9	8	8	8	6	16
Calm1	14	255	562	497	761	647	286	459	289	660	92	750	244	323	677	465	755	393	441	229	383	133	546
Calm2	3	84	165	186	230	201	78	169	84	159	26	235	88	146	213	174	230	124	110	84	117	46	171
Calm3	2	20	40	49	52	35	28	42	29	60	12	52	16	23	48	41	48	36	30	17	24	5	58
Calm4	0	0	0	0	0	0	0	0	0	0	0	0	0	0	0	1	0	0	0	0	0	0	0
Calml3	0	0	0	0	0	1	0	0	0	0	0	0	0	0	0	0	0	0	0	0	0	0	0
Calr	4	24	49	69	96	74	39	55	39	59	8	82	27	40	77	69	78	52	44	26	37	10	74
Calr-ps	0	1	1	3	10	2	2	0	1	1	0	4	0	0	3	4	4	2	1	2	2	0	5
Calr3	0	0	0	0	0	0	0	1	0	1	0	0	0	2	0	0	0	0	0	0	0	0	0
Calu	0	7	4	17	15	16	10	15	8	14	2	12	5	4	10	11	10	10	6	5	5	2	17
Camk1	0	0	0	0	0	0	0	0	0	0	0	0	0	0	0	0	0	0	0	0	0	0	0
Camk1d	1	10	7	8	11	10	4	6	3	7	1	15	8	4	15	5	17	6	8	8	11	3	6
Camk2a	0	0	0	0	0	0	0	0	0	0	0	0	0	0	0	0	0	0	1	0	0	0	0
Camk2b	1	1	4	7	10	4	1	3	0	4	1	7	0	4	2	3	10	4	4	2	1	1	6
Camk2d	0	2	8	5	9	11	7	5	3	5	1	16	5	9	6	4	15	10	6	3	5	1	8
Camk2g	0	4	14	13	13	11	7	5	4	7	1	13	3	6	10	12	9	6	8	5	4	3	6
Camk2n1	0	4	4	7	5	8	10	8	5	14	3	6	2	1	5	1	4	6	5	4	3	1	3
Camk2n2	0	0	0	0	0	0	0	0	0	0	0	0	0	0	1	0	0	0	1	0	0	0	0
Camk4	1	9	12	15	23	15	5	16	9	22	5	20	14	6	15	13	18	14	22	7	12	1	6
Camkk1	0	1	1	3	5	2	1	2	1	1	0	2	0	3	3	2	1	1	1	1	0	0	2
Camkk2	0	3	1	2	3	1	1	2	1	2	0	7	0	0	3	2	4	2	1	0	2	1	2
Camkmt	0	0	0	2	4	2	2	3	0	8	0	4	0	4	3	2	3	0	2	2	0	0	0
Camkv	0	0	0	0	0	0	0	0	0	0	0	0	0	0	0	0	0	0	0	0	0	0	0
Caml	2	5	7	10	11	10	6	8	10	13	1	7	5	4	8	8	10	5	10	2	6	3	15
Camp	0	0	0	0	0	0	0	0	0	0	0	0	0	0	0	0	0	0	0	0	0	0	0
Camsap1	0	1	1	1	0	0	1	1	0	1	0	5	1	3	3	1	0	3	0	0	2	0	0
Camsap2	0	4	0	3	2	4	1	1	1	1	0	2	1	3	2	1	5	1	2	2	1	0	1
Camsap3	0	0	0	0	0	0	0	0	0	0	0	0	0	0	0	0	0	0	0	0	0	0	0
Camta1	1	3	10	13	13	10	4	13	5	12	0	6	3	1	7	8	9	3	7	9	10	4	6
Camta2	1	5	11	6	12	23	8	9	5	21	2	11	5	9	18	16	14	6	6	5	12	4	12
Cand1	1	4	8	10	13	10	4	9	6	10	2	11	9	8	16	7	19	5	8	5	4	2	9
Cand2	0	1	1	1	0	7	1	0	1	2	0	3	2	1	3	4	1	1	0	2	4	1	0
Cant1	2	7	28	25	20	22	12	19	11	18	1	37	13	15	30	25	30	13	20	10	14	8	19
Canx	0	42	56	58	94	80	25	59	28	69	14	110	27	46	86	72	83	42	53	24	46	21	67
Cap1	5	75	160	147	191	149	94	143	80	168	26	220	57	110	192	130	196	112	147	77	107	39	170
Capg	0	12	20	21	169	50	6	4	9	17	5	24	12	17	76	39	49	13	13	11	5	5	19
Capn1	1	8	13	8	14	11	6	5	7	9	2	20	6	12	11	18	20	9	6	4	4	1	13
Capn10	1	0	3	0	3	4	0	2	3	0	1	3	1	0	1	4	4	0	0	0	2	1	5
Capn11	0	0	0	0	0	0	0	0	0	3	1	0	0	0	0	0	0	0	0	0	0	0	2
Capn15	1	3	11	5	11	10	3	7	1	8	2	18	4	8	6	8	7	9	3	7	5	0	2
Capn2	2	12	29	24	55	35	12	19	3	15	4	25	11	20	27	19	25	16	12	5	11	4	21
Capn3	0	0	0	0	1	1	0	0	0	0	0	4	0	2	1	1	2	1	0	2	0	0	0
Capn5	0	0	0	0	0	0	0	0	0	0	0	0	0	3	2	1	0	2	0	0	0	0	2
Capn6	0	0	0	0	1	0	0	0	0	0	0	0	0	0	0	0	0	0	0	0	0	0	0
Capn7	1	8	14	14	14	23	8	26	3	14	2	32	7	11	17	12	15	10	8	10	13	3	18
Capn9	0	0	0	0	0	0	0	0	0	0	0	0	0	0	0	0	0	0	0	0	0	0	0
Capns1	1	15	25	32	44	36	20	33	16	46	7	52	11	19	31	29	42	25	30	10	27	1	36
Caprin1	0	18	23	25	34	34	13	23	15	26	1	51	19	19	33	29	25	11	29	18	18	13	20
Caprin2	0	5	2	4	4	4	2	3	0	0	1	0	0	2	2	3	2	2	3	1	3	1	1
Capsl	0	0	0	0	0	0	0	0	0	0	0	1	1	0	0	0	0	0	1	0	1	1	1
Capza1	0	10	33	29	38	36	20	25	16	37	5	46	11	22	32	27	35	22	19	13	16	6	27
Capza2	9	29	56	60	116	96	28	55	24	88	15	95	38	45	89	59	95	44	73	35	65	19	69
Capzb	11	127	271	292	420	330	147	294	180	306	48	433	126	176	341	242	387	201	232	126	170	65	292
Car1	0	0	0	0	0	0	0	0	0	0	0	0	0	0	0	1	0	0	0	0	0	0	0
Car11	0	0	1	1	0	1	0	0	0	1	0	1	2	1	1	1	1	1	1	1	0	0	0
Car12	0	1	0	0	0	2	2	1	0	1	0	1	1	0	2	1	2	0	2	2	6	0	1
Car13	0	0	0	0	0	0	0	0	0	0	0	0	0	0	0	0	0	1	0	0	0	0	0
Car2	0	0	2	0	0	0	3	8	2	14	1	4	2	1	2	1	2	2	1	3	3	2	3
Car3	0	0	0	0	2	1	0	0	0	0	0	0	0	0	0	1	1	0	0	0	0	1	0
Car5b	0	0	5	3	6	4	3	2	3	8	0	5	3	4	6	0	6	5	4	4	10	3	5
Car7	0	1	0	1	0	0	0	1	1	0	2	0	0	2	0	0	0	0	0	0	1	0	3
Car8	0	1	1	1	1	0	0	0	0	0	0	0	0	0	0	0	1	0	0	0	0	0	0
Car9	0	0	0	0	0	0	0	0	0	1	0	0	0	0	0	0	0	0	0	0	0	0	0
Card10	0	0	0	0	1	0	0	0	0	1	0	0	0	0	0	0	1	0	0	0	0	0	0
Card11	1	11	18	11	27	26	7	16	5	12	3	32	11	11	17	13	37	12	13	10	9	5	18
Card19	1	17	36	29	47	25	3	12	8	16	0	32	9	23	33	29	50	12	28	10	16	5	30
Card6	0	6	7	9	11	13	4	8	2	5	2	22	2	8	8	8	14	4	4	7	4	1	9
Card9	0	0	0	0	0	0	0	0	0	0	0	1	0	0	1	0	0	0	0	0	0	0	0
Carf	0	1	0	0	0	2	1	2	1	1	0	1	0	0	0	0	1	2	0	1	1	0	0
Carhsp1	1	7	14	10	8	10	11	12	7	14	2	15	5	3	9	13	10	12	11	5	8	1	13
Carlr	0	0	0	0	0	0	0	0	0	0	0	0	0	0	0	0	0	0	0	0	0	0	0
Carm1	0	1	2	1	3	2	0	0	1	0	0	4	2	1	2	2	5	2	4	1	0	0	4
Carmil1	0	0	0	0	0	1	0	0	0	0	0	0	0	2	1	2	1	0	0	0	1	0	0
Carmil2	0	1	4	3	1	5	0	4	2	3	0	8	2	2	1	2	1	2	4	2	1	0	4
Carmil3	0	0	0	0	0	0	0	0	0	0	0	0	0	0	0	0	0	0	0	0	1	0	0
Carnmt1	0	1	4	0	2	0	1	2	1	2	0	2	1	0	2	0	1	0	1	0	0	0	1
Carns1	1	3	4	4	8	7	3	5	4	8	1	3	1	2	1	5	12	1	6	3	4	0	4
Cars	0	5	8	10	14	8	1	4	4	6	2	14	3	4	12	12	1	7	7	6	7	2	8
Cars2	0	3	3	6	9	10	2	4	5	3	1	19	4	7	11	4	11	5	7	1	7	2	10
Casc3	0	4	4	4	12	8	1	8	3	6	1	8	3	1	5	5	6	5	5	2	1	0	6
Casc4	0	1	6	1	1	1	1	0	0	2	0	0	2	0	8	5	3	1	1	2	0	0	4
Casd1	0	1	0	0	3	2	3	2	2	3	0	4	2	0	4	2	4	3	0	1	1	0	3
Cask	0	0	0	0	0	0	0	0	1	0	0	1	0	2	0	0	0	0	0	0	0	0	0
Caskin2	0	2	1	1	1	1	0	0	2	0	0	0	0	0	0	1	1	0	0	1	0	0	1
Casp1	0	12	37	31	29	46	25	48	25	45	7	29	14	15	39	28	32	21	30	11	29	7	37
Casp12	0	0	0	0	0	0	0	0	0	0	0	0	0	0	0	0	0	0	0	0	0	0	0
Casp2	0	5	12	11	16	17	7	7	6	17	2	25	11	4	11	10	11	6	7	8	7	4	13
Casp3	0	3	3	13	10	13	14	28	7	28	5	14	6	7	17	6	18	12	11	8	6	8	11
Casp4	0	1	3	2	2	2	1	12	4	13	0	5	2	1	2	3	2	7	5	5	6	3	7
Casp6	0	10	8	3	16	11	14	8	4	10	0	24	4	8	10	6	12	10	11	1	9	3	11
Casp7	0	0	1	3	3	4	2	3	5	9	0	6	0	0	8	3	5	1	4	1	2	1	6
Casp8	2	12	22	32	58	28	19	38	18	44	7	57	10	17	42	20	51	26	26	9	16	8	25
Casp8ap2	1	12	22	16	17	42	15	23	15	31	0	26	13	14	28	24	29	20	21	6	10	5	36
Casp9	0	1	1	1	3	1	0	6	1	2	0	7	3	2	6	3	6	1	2	0	0	1	4
Cass4	0	0	1	1	1	0	0	0	0	0	0	0	0	0	0	0	0	0	0	0	0	0	0
Cast	1	20	34	39	89	56	19	34	34	54	14	75	24	33	65	38	76	41	46	36	39	9	60
Castor1	0	1	5	3	18	8	1	4	2	9	1	9	4	0	11	6	6	4	2	0	5	2	4
Castor2	0	0	0	0	0	1	1	1	2	0	0	0	0	0	1	0	0	1	0	0	1	0	0
Casz1	0	0	2	0	1	5	1	3	1	2	0	2	3	2	1	0	3	0	0	0	1	1	0
Cat	0	9	24	20	35	22	4	8	7	19	4	42	9	14	28	20	36	11	27	11	11	5	27
Catip	0	0	0	0	0	0	0	0	0	0	0	0	0	1	0	0	0	0	0	0	0	0	0
Catsper2	0	0	1	0	0	1	2	0	0	0	0	0	0	0	0	1	0	0	0	0	0	0	1
Catsperd	0	0	1	0	0	0	0	1	0	0	0	0	0	0	0	0	0	0	0	0	0	0	0
Catsperg1	0	0	0	0	0	0	0	1	0	0	0	0	0	0	1	0	0	0	0	0	0	0	0
Cav1	0	0	0	0	0	0	0	0	0	0	0	0	0	0	0	0	0	0	0	0	0	0	0
Cav2	0	0	0	0	0	0	1	0	0	0	0	0	0	0	0	1	0	1	0	0	0	0	0
Cavin1	0	0	0	0	0	0	0	0	0	0	0	0	0	0	0	0	0	0	0	0	0	0	0
Cavin2	0	2	0	1	2	0	0	0	0	0	0	0	1	0	3	0	2	0	0	0	0	0	0
Cavin3	0	0	0	0	0	0	0	0	1	0	0	0	0	0	0	0	0	0	0	0	0	0	0
Cbarp	0	1	3	1	2	5	0	2	0	1	0	3	1	2	3	1	2	3	2	4	3	0	1
Cbfa2t2	0	0	3	1	4	0	1	0	0	2	1	0	0	0	2	0	3	3	6	0	2	1	0
Cbfa2t2-ps1	0	0	0	0	0	0	0	0	0	0	0	0	0	0	0	0	0	0	0	0	0	0	0
Cbfa2t3	0	0	0	0	0	2	0	0	0	1	0	3	1	1	2	0	2	1	3	2	0	1	1
Cbfb	0	1	3	5	10	5	11	12	3	9	2	8	4	4	7	9	11	5	2	7	3	4	7
Cbl	0	2	8	12	15	16	10	17	2	11	0	24	9	10	15	8	13	11	4	2	11	6	10
Cblb	1	9	16	18	21	26	20	29	29	43	7	23	10	11	30	7	17	22	26	16	22	5	17
Cbll1	0	4	7	13	12	9	6	11	4	8	1	12	2	10	6	5	14	9	12	7	6	0	6
Cbln3	0	0	0	0	0	0	0	0	0	0	0	0	0	1	1	0	0	0	0	0	0	0	0
Cbr1	0	8	14	9	25	23	7	12	5	12	0	25	8	9	19	28	22	4	8	4	7	4	16
Cbr2	0	0	0	0	0	0	0	0	0	0	0	0	0	0	0	0	0	0	0	0	0	0	0
Cbr3	0	0	0	0	0	0	0	0	0	0	0	1	0	0	0	0	0	0	0	1	0	0	0
Cbr4	0	3	6	3	5	5	0	1	6	3	0	9	1	6	7	7	7	4	2	4	1	1	0
Cbwd1	0	5	11	14	14	16	2	11	6	14	2	4	5	2	10	8	8	6	4	5	5	3	6
Cbx1	2	4	27	9	18	15	4	24	12	19	0	36	4	20	20	7	25	21	13	6	18	5	19
Cbx2	0	0	1	0	0	2	0	0	0	0	0	0	0	1	0	1	0	1	0	1	1	0	2
Cbx3	0	0	7	2	2	11	4	4	1	3	0	7	3	2	2	5	6	0	3	3	3	1	5
Cbx3-ps6	0	0	0	0	0	0	0	0	0	0	0	1	0	0	0	0	0	0	0	0	1	0	0
Cbx4	1	9	13	13	13	15	12	14	6	23	0	14	14	16	10	12	21	14	7	2	8	3	8
Cbx5	1	1	13	10	14	15	9	11	2	10	3	23	2	6	19	8	10	7	7	7	8	4	12
Cbx6	1	1	4	5	2	4	4	5	4	4	1	8	0	2	3	4	4	2	5	6	5	1	9
Cbx7	0	7	15	12	27	9	5	6	4	7	3	40	8	10	19	16	17	5	4	9	2	7	19
Cbx8	0	2	10	5	5	4	5	5	4	8	0	9	0	3	7	6	7	5	3	5	5	0	6
Cby1	0	4	7	1	12	4	3	1	1	6	1	8	3	2	8	7	6	4	0	0	3	1	4
Cc2d1a	2	4	7	14	11	10	8	13	4	5	0	20	5	3	17	9	9	7	5	5	4	3	14
Cc2d1b	1	14	23	9	26	25	10	17	9	13	2	33	10	8	32	18	27	9	14	5	11	4	12
Cc2d2a	0	0	0	0	0	0	0	0	0	0	0	0	0	0	0	0	0	0	0	0	0	0	0
Ccar1	0	10	12	22	25	20	9	18	10	19	7	39	12	8	14	22	27	9	14	10	22	5	20
Ccar2	0	7	9	11	23	10	4	15	6	10	5	18	5	5	13	12	17	4	16	12	13	4	11
Ccdc102a	0	1	5	3	5	4	0	0	0	2	0	8	0	2	8	0	3	1	2	1	1	1	3
Ccdc106	0	0	0	0	0	0	0	1	0	0	0	0	0	0	1	0	0	0	0	0	0	0	0
Ccdc107	0	16	35	36	46	35	15	24	12	13	5	50	17	22	35	20	43	20	29	10	27	2	21
Ccdc112	0	0	0	0	1	0	0	0	0	1	1	0	0	0	1	0	1	0	1	0	0	0	1
Ccdc114	0	0	0	0	0	0	0	0	0	0	0	0	0	1	2	0	1	0	0	0	0	0	1
Ccdc115	1	7	18	19	33	22	7	11	10	20	1	21	4	8	14	15	22	10	15	7	12	7	17
Ccdc116	0	0	0	0	0	0	0	0	0	1	0	1	0	1	0	0	0	1	0	0	1	0	0
Ccdc117	0	3	5	2	8	6	2	7	4	9	4	7	9	3	5	6	8	4	7	3	2	1	7
Ccdc12	2	34	59	66	112	81	35	68	32	79	6	96	35	41	92	62	91	43	65	36	48	15	79
Ccdc122	0	0	0	0	0	0	0	0	0	0	0	1	0	0	0	0	0	0	0	0	0	0	0
Ccdc124	4	26	60	45	88	54	21	36	13	40	11	78	21	21	60	36	72	34	36	25	38	7	50
Ccdc125	0	4	5	4	8	10	1	3	3	5	1	8	3	8	10	9	5	4	5	8	6	1	5
Ccdc126	0	0	2	1	2	0	0	4	1	1	0	1	3	1	4	2	4	2	3	3	4	0	3
Ccdc127	1	5	13	8	12	14	10	6	8	16	5	11	7	6	11	14	14	11	7	7	8	1	16
Ccdc130	2	5	14	9	16	13	4	11	1	9	0	12	3	6	15	13	12	11	8	4	2	0	6
Ccdc134	0	1	2	6	9	6	1	1	3	5	1	7	2	1	8	6	9	4	5	3	3	3	6
Ccdc136	0	3	7	5	7	4	4	5	0	2	0	2	0	2	2	0	4	0	0	0	4	1	1
Ccdc137	0	0	7	8	5	12	0	11	7	4	1	7	3	8	7	2	8	4	3	6	4	2	10
Ccdc138	1	1	2	2	0	0	0	0	0	0	0	0	0	1	2	1	1	0	1	0	0	0	0
Ccdc14	1	0	0	1	2	0	0	0	0	1	0	0	0	0	0	0	0	0	1	0	0	0	1
Ccdc141	0	0	0	0	0	0	0	0	0	0	0	3	0	0	0	0	0	0	0	0	0	0	0
Ccdc142os	0	0	0	5	1	1	1	0	1	1	0	1	0	0	0	0	0	1	1	0	0	2	0
Ccdc146	0	0	0	1	1	2	1	0	0	2	0	0	3	1	0	0	2	0	0	0	0	1	0
Ccdc148	0	0	0	0	1	0	1	0	0	0	0	2	0	0	0	0	0	0	1	0	1	0	1
Ccdc15	0	0	3	4	1	2	1	4	1	2	2	5	0	1	7	0	2	0	2	0	5	1	1
Ccdc152	0	0	0	0	0	0	0	0	1	0	0	0	1	0	0	0	0	0	0	0	0	0	0
Ccdc155	0	0	0	0	0	0	0	0	0	0	0	0	0	0	0	0	0	0	0	0	0	0	0
Ccdc157	0	0	0	1	0	0	0	0	0	1	0	2	1	0	1	0	0	0	1	0	2	0	0
Ccdc160	0	0	0	0	0	0	0	0	0	0	0	0	0	0	0	0	0	0	0	0	0	0	0
Ccdc162	0	3	0	0	1	4	1	0	0	1	0	2	1	4	4	5	1	2	0	0	1	0	1
Ccdc163	1	0	3	0	5	4	0	2	3	3	0	1	3	1	5	0	4	3	3	1	2	1	1
Ccdc166	0	6	4	9	21	7	4	14	4	9	1	11	1	3	8	6	15	3	4	3	3	2	5
Ccdc167	0	2	1	6	13	10	1	4	2	6	0	12	1	2	6	2	8	3	2	2	1	0	0
Ccdc17	0	0	2	0	4	3	1	3	1	4	1	8	2	1	2	2	0	1	0	0	1	0	2
Ccdc170	1	0	0	0	0	0	0	0	0	0	0	0	0	0	0	0	0	0	0	0	0	0	0
Ccdc171	0	3	11	8	4	12	2	6	0	10	1	17	3	7	8	7	13	3	6	3	10	1	11
Ccdc172	0	0	0	0	0	0	0	0	0	0	0	0	0	0	0	0	0	0	0	0	0	0	1
Ccdc173	0	0	0	0	0	2	2	0	0	1	0	1	0	0	1	1	0	1	0	1	2	0	1
Ccdc174	1	15	16	18	37	32	12	19	11	19	3	26	5	15	23	21	24	10	13	9	15	8	29
Ccdc18	0	0	0	0	0	0	0	3	2	1	1	0	1	0	0	0	0	0	2	0	1	0	1
Ccdc180	0	1	0	0	15	6	0	2	0	1	0	5	0	4	11	6	17	1	0	0	1	2	6
Ccdc181	0	1	2	1	4	7	2	2	1	4	0	6	0	0	2	3	4	5	1	2	1	0	3
Ccdc186	0	11	9	18	19	11	12	18	5	16	0	15	7	7	14	6	23	6	12	2	17	1	19
Ccdc189	0	0	0	2	0	0	0	0	0	0	0	0	0	0	0	0	0	0	1	0	0	0	0
Ccdc191	0	2	6	3	8	5	0	3	0	3	0	9	1	4	12	5	5	2	2	1	6	0	7
Ccdc192	0	0	0	0	0	0	0	0	0	0	0	0	0	0	0	0	0	0	0	0	0	0	0
Ccdc22	0	2	9	9	12	6	2	7	4	5	1	17	7	1	11	8	6	4	3	0	4	0	6
Ccdc25	0	6	22	8	14	6	6	9	10	9	0	16	3	5	13	11	16	3	13	5	12	2	9
Ccdc28a	0	5	6	6	8	13	2	9	0	3	0	7	4	8	12	4	7	8	7	5	3	3	7
Ccdc28b	0	0	2	1	4	4	0	0	1	0	0	13	2	4	2	0	4	2	3	3	0	1	1
Ccdc30	0	2	2	1	2	2	1	1	1	1	0	3	0	0	2	0	4	0	1	0	1	0	1
Ccdc32	2	2	7	11	14	17	6	7	3	9	1	19	5	4	20	5	16	6	11	8	4	1	12
Ccdc34	1	2	7	2	7	5	1	1	3	6	0	4	1	1	5	7	1	2	3	2	0	1	9
Ccdc38	0	0	0	1	1	1	0	0	0	0	0	1	0	0	2	0	0	1	0	0	1	2	0
Ccdc40	0	0	0	0	0	0	0	0	0	0	0	0	0	0	0	0	0	0	0	0	0	0	0
Ccdc43	1	5	7	10	6	2	5	4	3	3	0	11	1	5	9	9	12	5	2	3	2	2	8
Ccdc47	4	16	23	33	54	31	12	38	14	23	3	56	10	17	43	29	41	21	35	12	18	8	28
Ccdc50	0	6	21	10	18	15	7	16	6	11	1	14	3	10	18	8	18	9	8	5	7	3	12
Ccdc50-ps	0	2	5	4	3	6	3	5	2	1	0	7	1	4	5	2	7	0	2	4	1	0	3
Ccdc51	0	1	6	2	5	5	6	8	2	1	0	7	0	4	3	4	6	2	2	2	1	0	0
Ccdc58	0	2	5	1	11	8	5	8	1	6	2	10	5	8	10	7	9	7	8	4	4	1	9
Ccdc59	0	16	31	23	49	36	11	17	19	46	6	39	8	15	34	23	28	22	25	16	20	11	27
Ccdc6	0	0	3	1	4	5	0	3	1	1	0	1	0	2	2	2	1	1	4	0	0	0	0
Ccdc61	0	4	7	6	11	7	4	6	3	4	1	8	2	6	6	4	5	5	6	6	6	1	4
Ccdc62	0	0	0	3	1	1	0	0	0	0	1	0	0	1	1	0	2	1	1	0	1	1	1
Ccdc63	0	0	0	0	0	0	1	0	1	0	0	0	0	0	0	0	0	0	0	0	0	0	0
Ccdc66	1	3	9	8	4	3	9	8	4	15	1	18	2	10	6	9	9	2	3	3	6	3	3
Ccdc69	0	5	11	10	16	13	5	14	3	11	6	7	3	10	14	12	11	2	7	5	3	6	12
Ccdc71	1	6	17	19	11	9	9	11	4	18	1	27	7	8	17	18	19	3	10	8	7	3	16
Ccdc71l	0	0	4	0	0	4	0	0	2	1	1	2	1	1	2	0	2	0	3	0	1	1	3
Ccdc77	0	4	0	7	5	6	0	4	0	4	0	5	1	2	4	1	7	2	3	1	3	0	4
Ccdc78	0	0	0	0	0	0	0	1	0	0	0	0	0	0	0	0	1	0	0	0	0	0	0
Ccdc80	0	0	0	0	0	0	0	0	1	0	0	0	0	0	0	0	0	0	0	0	0	0	0
Ccdc82	2	20	45	33	26	30	24	43	25	37	10	40	13	22	32	24	36	13	22	16	15	8	16
Ccdc84	1	10	8	14	15	11	8	11	5	10	0	12	7	6	6	7	14	5	6	9	5	0	9
Ccdc85b	0	7	10	13	17	22	8	13	4	10	1	26	2	2	19	10	19	5	6	4	7	5	12
Ccdc86	1	4	6	17	13	11	3	13	10	10	3	11	2	12	9	10	9	3	12	7	5	1	7
Ccdc88a	0	0	0	0	0	3	0	0	0	0	0	2	0	1	1	2	0	2	0	0	1	0	1
Ccdc88b	0	19	34	22	11	29	9	22	15	13	6	42	13	11	39	21	41	19	17	11	23	4	17
Ccdc88c	5	34	59	53	78	90	32	48	24	48	14	76	18	38	73	41	75	29	41	18	43	18	58
Ccdc9	1	1	8	7	12	6	2	6	0	4	0	5	2	4	13	3	9	1	3	3	4	2	5
Ccdc90b	0	1	3	6	6	13	5	3	4	2	0	6	4	3	8	5	8	4	4	1	3	1	6
Ccdc91	0	3	10	4	9	12	3	6	1	8	0	11	5	9	6	8	9	1	4	2	5	3	8
Ccdc92	0	3	11	7	14	9	4	11	4	12	1	10	3	3	10	3	11	3	4	1	6	2	9
Ccdc93	0	1	4	5	7	8	1	6	4	7	1	16	0	1	10	6	7	1	8	0	1	1	3
Ccdc97	1	8	16	11	24	23	11	16	5	27	7	19	13	6	15	17	22	12	10	9	14	2	16
Ccer2	0	0	0	0	0	0	0	0	0	0	0	0	0	0	0	0	0	0	0	0	0	0	0
Cchcr1	0	0	2	3	4	6	0	1	2	3	1	4	0	2	3	2	3	0	0	0	1	1	3
Cck	0	0	0	0	0	0	0	0	0	0	0	0	0	0	0	0	0	0	0	0	0	0	0
Ccl1	0	0	0	0	1	0	0	0	0	0	0	0	0	0	0	0	0	0	0	0	0	0	0
Ccl11	0	0	0	0	0	0	0	0	0	0	0	0	0	0	0	0	0	0	0	0	0	0	0
Ccl2	0	0	0	0	0	0	1	0	0	0	0	0	0	0	0	0	0	0	0	0	0	0	0
Ccl22	0	0	0	0	0	0	0	0	0	0	0	2	0	0	0	1	0	0	0	0	0	0	0
Ccl25	0	1	0	0	1	1	1	1	0	0	0	2	0	0	1	0	2	0	0	0	1	0	2
Ccl27a	0	0	2	1	3	2	0	3	1	3	0	0	0	0	3	2	2	3	1	2	3	0	3
Ccl3	4	83	469	450	265	232	123	216	149	325	59	21	21	81	211	173	260	71	63	59	62	19	57
Ccl4	23	353	1366	1447	1018	1002	422	795	696	1523	183	84	119	277	704	806	1214	510	505	298	492	136	671
Ccl5	407	4769	7723	7970	10042	7788	7533	12580	8850	17124	2980	7881	2890	4263	8495	6337	8951	5931	6828	3916	6102	2279	8121
Ccl6	0	1	1	2	1	8	0	0	3	3	0	0	1	0	2	6	7	0	2	0	0	2	1
Ccl7	0	0	0	0	0	0	0	0	0	0	0	0	0	0	0	0	0	0	0	1	0	0	0
Ccl8	0	0	2	0	0	0	0	0	0	1	0	0	0	0	0	0	0	0	0	0	0	0	0
Ccl9	1	0	3	3	6	7	0	0	0	0	0	0	0	0	4	1	7	2	0	0	0	0	0
Ccm2	0	17	29	28	37	29	20	36	13	36	3	51	15	22	41	19	29	16	23	22	21	7	43
Ccna2	0	0	0	0	0	0	0	0	1	0	0	1	0	0	2	2	1	0	0	1	0	0	2
Ccnb1	0	1	0	0	1	3	0	1	1	3	1	1	0	1	1	1	3	0	0	0	0	0	1
Ccnb2	0	1	0	2	2	4	1	0	2	1	0	1	0	0	0	2	2	5	1	0	0	0	0
Ccnb2-ps	0	0	0	0	0	0	0	0	0	0	0	0	0	0	0	0	0	0	0	0	0	0	0
Ccnc	1	2	5	10	11	13	3	5	6	17	3	9	4	5	14	8	18	5	6	6	6	1	8
Ccnd1	0	1	0	0	1	17	1	2	0	1	0	4	10	10	7	10	20	9	8	5	6	1	6
Ccnd2	10	92	220	211	262	221	80	158	74	204	43	341	70	77	204	127	228	106	155	72	108	34	149
Ccnd3	7	58	173	192	279	187	56	94	39	141	19	222	48	78	190	143	205	87	105	45	71	33	148
Ccnd3-ps	0	0	0	0	0	1	0	1	0	0	0	2	0	0	0	0	2	0	1	0	0	0	0
Ccndbp1	1	21	34	38	54	35	24	36	19	39	6	50	20	23	39	29	54	24	21	13	16	6	37
Ccne1	0	1	4	6	11	7	1	4	0	6	2	5	0	1	5	4	4	2	4	5	2	0	4
Ccne2	0	1	0	0	2	1	1	2	1	1	0	0	0	0	1	0	0	0	5	1	3	0	1
Ccnf	0	1	0	0	0	1	1	1	1	0	0	0	0	0	0	0	1	1	0	0	0	0	2
Ccng1	0	14	30	18	44	31	18	39	28	41	8	51	12	22	32	26	48	26	22	16	16	5	31
Ccng2	1	0	3	9	3	2	0	4	2	9	0	5	2	4	3	3	10	0	7	1	6	1	3
Ccnh	3	12	17	11	45	30	7	31	13	24	2	27	12	8	18	25	36	16	19	10	17	7	18
Ccni	0	3	8	3	7	5	9	5	4	8	2	12	3	1	12	0	8	5	7	4	8	1	7
Ccnj	0	0	1	1	1	1	0	1	0	2	0	0	0	0	0	2	1	0	0	0	0	0	0
Ccnjl	0	0	0	0	0	0	0	0	1	0	0	0	0	0	0	0	0	2	0	1	0	0	0
Ccnk	1	3	8	4	8	8	2	8	2	11	2	8	4	4	5	10	11	3	1	2	3	0	8
Ccnl1	0	28	55	50	95	95	33	66	31	82	11	46	41	53	66	43	102	39	59	31	64	18	63
Ccnl2	1	21	45	30	58	44	29	33	21	38	14	65	24	28	54	41	52	25	46	18	39	9	46
Ccno	0	1	2	1	0	4	0	1	0	1	0	0	0	1	0	1	1	1	1	2	1	0	2
Ccnt1	1	6	12	12	11	16	9	6	2	16	2	11	4	9	7	7	9	6	10	5	7	3	7
Ccnt2	0	5	5	13	9	12	8	10	1	8	2	14	4	8	19	4	14	5	11	9	5	0	8
Ccny	0	3	5	10	8	15	4	8	6	4	0	12	4	4	4	6	7	4	6	1	9	4	9
Ccnyl1	0	0	0	0	0	0	0	1	0	0	0	0	0	0	0	0	1	0	0	0	1	0	1
Ccp110	1	3	5	1	4	3	1	0	3	4	2	4	2	2	0	7	5	3	1	0	0	1	5
Ccpg1	1	9	12	13	15	13	7	11	4	11	3	11	5	4	14	14	15	5	9	5	7	2	10
Ccpg1os	0	1	1	3	3	1	0	1	0	2	0	3	0	1	4	5	4	2	1	0	0	0	2
Ccr1	0	0	0	0	0	1	0	0	0	0	0	0	0	0	0	0	0	0	0	0	0	1	1
Ccr10	0	0	0	0	1	2	0	0	0	0	0	1	0	2	2	0	0	0	0	0	1	0	1
Ccr2	2	19	14	25	29	21	6	16	5	17	2	18	11	8	24	11	27	22	16	5	5	6	26
Ccr3	0	0	0	1	0	2	0	0	0	0	0	0	0	0	0	0	0	1	1	0	1	0	0
Ccr4	0	0	0	0	1	0	0	0	0	0	0	0	0	0	0	0	0	0	0	1	0	0	0
Ccr5	4	23	46	43	51	40	30	65	38	91	14	35	11	13	34	20	42	40	42	10	20	14	55
Ccr6	0	0	0	0	0	0	0	0	0	1	0	0	0	2	0	0	1	0	1	0	0	0	1
Ccr7	5	67	37	39	245	151	9	17	9	9	2	115	112	118	188	115	177	83	89	49	95	32	132
Ccr9	0	0	0	0	1	17	0	0	0	0	0	4	7	11	7	11	21	16	19	1	10	5	21
Ccrl2	0	3	1	4	3	3	5	3	4	12	1	4	0	2	6	1	1	3	3	3	1	0	3
Ccs	0	6	4	8	21	18	5	6	7	12	2	26	9	8	21	15	16	5	8	7	8	1	8
Ccsap	0	0	1	3	3	1	2	0	2	3	0	3	3	1	0	1	0	1	3	0	1	1	1
Ccser1	0	0	0	0	0	0	0	0	0	0	0	0	0	0	0	0	0	0	0	0	0	0	0
Ccser2	1	5	15	12	32	36	11	20	17	20	3	22	7	14	19	16	14	13	9	10	12	4	18
Cct2	3	21	39	43	70	60	28	42	9	51	12	63	31	38	71	43	71	48	35	14	45	15	65
Cct3	0	12	37	34	59	40	28	37	17	44	10	66	28	23	61	41	52	43	28	24	48	7	36
Cct3-ps1	0	0	0	0	0	0	1	0	0	0	0	0	0	0	0	0	0	0	0	0	0	0	2
Cct4	1	32	51	57	95	79	23	58	33	61	7	103	29	50	69	56	109	47	49	40	51	11	67
Cct5	3	50	68	88	151	114	49	65	44	89	5	153	61	59	138	98	121	78	92	55	89	21	106
Cct6a	0	31	50	50	101	68	12	43	27	55	8	101	23	47	73	55	68	60	60	37	50	12	71
Cct6b	0	1	1	2	0	0	0	0	1	0	0	1	0	0	1	1	2	2	0	0	1	0	0
Cct7	3	44	96	92	152	122	47	112	58	134	19	128	45	61	119	81	132	86	88	55	75	27	112
Cct8	3	42	54	50	114	83	32	69	19	70	11	124	32	63	96	58	109	59	83	42	69	23	93
Ccz1	0	1	6	2	6	3	2	3	3	6	5	9	2	6	7	5	6	3	4	3	3	3	5
Cd101	1	4	3	7	6	7	5	13	7	13	3	10	0	1	7	4	9	6	2	3	5	0	13
Cd14	0	0	0	0	0	1	0	0	0	0	0	1	0	0	0	0	2	0	1	0	0	1	0
Cd151	0	2	1	3	3	4	1	3	3	1	1	8	1	3	4	4	1	0	4	0	0	0	3
Cd160	2	43	126	102	97	60	66	107	31	65	14	65	2	31	72	45	79	13	10	9	14	5	22
Cd163	0	0	0	0	0	0	0	0	0	0	0	0	0	0	0	1	0	0	0	0	0	0	1
Cd163l1	0	2	2	0	1	4	0	0	0	1	0	9	1	1	2	1	1	2	5	0	1	0	2
Cd164	1	31	40	55	79	59	43	60	39	72	12	73	26	32	57	43	84	51	56	28	36	26	73
Cd177	0	0	0	0	0	0	0	0	0	0	0	0	0	0	0	0	0	0	0	0	0	0	0
Cd180	0	0	1	0	0	4	0	0	0	0	0	2	0	3	3	3	3	3	1	1	0	2	3
Cd19	0	0	0	0	1	0	1	0	1	0	0	3	0	0	0	3	0	2	0	0	0	0	0
Cd1d1	0	7	6	11	15	12	9	12	9	10	1	17	3	12	16	9	14	9	4	11	8	4	15
Cd1d2	0	0	0	0	0	0	0	0	0	0	0	0	0	0	0	0	0	0	0	0	0	0	0
Cd2	7	122	206	210	341	196	141	233	152	281	23	293	79	140	267	173	262	165	195	126	179	46	264
Cd200	0	0	0	0	1	5	0	2	2	3	0	3	2	0	3	7	5	3	4	1	2	2	2
Cd200r1	0	1	7	5	5	4	4	5	10	19	3	5	0	4	8	1	6	0	2	3	2	3	7
Cd200r2	0	1	1	1	2	0	1	1	4	17	0	0	0	0	1	0	0	1	0	1	1	0	0
Cd200r3	0	0	0	0	0	0	0	0	0	0	0	0	0	0	0	0	1	0	0	0	0	0	0
Cd200r4	0	8	9	9	12	5	12	14	11	25	1	3	3	7	10	7	12	9	3	7	8	2	6
Cd207	0	0	0	1	0	0	0	1	0	0	0	3	0	0	0	0	0	0	0	0	0	0	0
Cd209a	0	0	0	0	0	7	0	0	0	0	0	2	4	4	4	9	9	5	4	2	2	0	8
Cd209c	0	0	0	0	0	1	0	0	0	0	0	0	0	0	1	1	0	0	0	0	0	0	0
Cd209d	0	1	0	0	0	23	0	1	2	0	0	1	1	10	9	13	18	4	11	2	5	0	10
Cd209e	0	0	0	0	0	0	0	0	0	0	0	0	0	0	0	0	0	1	0	0	0	0	0
Cd22	0	4	1	2	1	1	1	2	1	2	0	14	1	1	5	1	1	1	1	2	3	0	2
Cd226	0	12	51	54	53	49	7	8	4	14	0	32	4	13	26	29	47	6	15	8	10	7	21
Cd244a	0	2	17	16	16	13	11	13	3	18	3	4	2	4	10	8	11	0	2	1	1	1	2
Cd247	9	54	67	88	153	142	55	118	47	138	20	144	36	59	128	104	133	102	96	45	73	23	91
Cd248	0	0	0	0	0	1	0	0	0	0	0	0	0	0	0	0	0	0	0	0	0	0	0
Cd24a	0	0	0	0	3	7	0	0	2	3	0	11	1	0	3	2	6	1	3	2	2	0	3
Cd27	2	39	60	54	95	71	69	104	77	139	25	166	37	59	109	52	88	69	75	37	76	16	117
Cd274	0	5	6	11	14	12	4	7	7	6	2	8	5	4	4	8	16	10	5	6	9	5	7
Cd28	5	36	50	39	69	59	49	93	42	98	16	63	30	56	70	25	67	58	44	33	69	20	62
Cd2ap	0	1	5	1	9	6	0	4	2	3	0	9	1	5	4	5	4	3	8	7	4	2	7
Cd2bp2	0	5	11	20	28	29	9	17	9	14	7	16	7	11	25	20	34	20	9	9	17	1	22
Cd300a	0	0	0	0	0	3	0	0	0	1	1	1	2	2	1	3	1	3	7	1	5	0	4
Cd300c	0	0	0	0	0	7	0	0	0	0	0	1	1	3	2	8	9	7	8	3	4	1	5
Cd300c2	0	0	0	0	0	4	0	0	0	0	0	0	2	3	0	0	0	0	0	0	1	0	1
Cd300e	0	0	0	0	0	0	0	0	0	0	0	1	0	0	0	0	0	0	0	0	0	0	0
Cd300lb	0	0	0	0	0	0	0	0	0	1	1	0	0	0	0	0	0	0	0	0	0	0	0
Cd300ld	0	0	0	0	0	0	0	1	0	0	0	0	0	0	0	0	0	0	0	0	0	0	0
Cd300lf	0	0	0	0	0	8	0	0	0	0	2	0	0	2	0	5	3	4	3	3	2	0	6
Cd300lg	0	1	0	0	0	0	0	0	0	0	0	0	0	2	0	0	0	0	1	1	0	0	0
Cd302	0	0	0	0	0	1	0	0	0	0	0	0	0	0	0	1	0	0	0	0	0	0	0
Cd320	0	2	1	3	8	6	1	4	1	5	0	10	2	6	8	4	3	5	10	1	6	0	7
Cd33	0	0	0	0	0	1	0	0	0	0	0	0	0	0	0	0	1	0	2	0	0	0	0
Cd34	0	0	0	0	0	0	0	0	0	0	0	0	0	0	0	0	0	0	1	0	0	0	0
Cd36	0	0	1	1	1	0	0	1	0	0	0	4	0	0	0	0	1	0	0	0	0	0	0
Cd37	7	75	165	127	277	207	108	158	115	151	33	259	68	123	224	142	238	130	95	71	116	35	163
Cd38	1	8	24	26	11	6	15	35	24	42	9	17	5	8	25	10	13	6	11	11	8	2	12
Cd3d	30	239	409	444	700	428	243	469	234	562	83	670	191	287	628	347	548	333	360	212	322	121	446
Cd3e	15	211	398	377	502	394	320	615	316	626	97	450	160	244	455	315	491	261	314	164	231	82	377
Cd3eap	0	3	5	3	17	6	2	6	5	3	1	26	8	11	15	11	8	8	3	6	7	2	10
Cd3g	15	220	486	512	666	468	316	631	367	822	150	523	126	256	493	324	541	266	303	188	249	90	377
Cd4	0	0	1	0	0	1	0	0	0	1	0	4	1	6	2	4	4	4	4	1	1	1	4
Cd40	0	0	0	0	0	0	0	0	0	1	0	0	0	0	0	0	0	0	1	0	2	0	0
Cd40lg	0	0	8	11	6	6	0	0	0	1	0	1	1	3	3	6	6	2	0	1	1	0	2
Cd44	0	14	36	18	53	36	2	16	13	20	2	38	13	30	37	33	52	16	16	18	15	6	36
Cd46	0	0	0	0	1	1	0	1	0	2	0	1	2	2	1	0	1	0	1	0	0	0	0
Cd47	3	84	155	152	261	187	37	101	58	109	15	225	74	121	236	163	241	107	146	78	110	39	159
Cd48	2	74	165	156	263	200	68	123	108	172	29	153	43	78	197	138	242	102	139	74	86	25	143
Cd5	0	28	41	59	72	51	41	53	29	57	7	66	35	53	67	65	64	34	35	17	28	17	64
Cd52	34	486	1072	1078	1828	1183	495	905	537	1184	156	1533	277	563	1176	830	1411	532	554	346	555	159	787
Cd53	11	97	137	146	279	207	81	106	78	145	28	225	86	125	262	158	241	119	144	81	128	39	208
Cd55	0	7	8	10	24	16	2	7	1	5	0	22	10	11	22	10	15	8	12	8	2	6	11
Cd59a	0	1	0	1	0	1	0	1	0	0	0	0	0	0	0	2	1	0	0	0	0	0	0
Cd5l	0	0	0	0	0	0	0	2	0	0	0	1	1	0	0	0	0	0	0	0	0	0	0
Cd6	4	77	122	121	133	148	66	107	53	113	21	106	30	57	113	97	120	68	89	47	50	24	85
Cd63	0	0	0	0	0	0	1	3	0	1	0	4	0	0	1	0	1	1	0	1	0	0	0
Cd63-ps	0	0	0	0	0	0	0	3	0	1	0	3	0	0	1	0	0	0	0	1	0	0	1
Cd68	1	4	3	7	6	12	5	9	10	12	3	15	8	9	8	9	25	12	17	7	13	5	24
Cd69	7	85	143	159	187	160	48	73	50	92	9	52	70	97	187	104	173	80	80	71	100	19	92
Cd7	8	135	357	409	386	270	182	364	120	275	64	242	68	103	299	164	295	67	82	59	77	29	142
Cd70	0	0	0	0	0	0	0	0	0	0	0	0	0	0	0	0	0	0	0	0	1	0	0
Cd72	3	37	70	54	108	76	43	58	22	44	16	71	30	51	72	56	100	41	38	18	32	11	56
Cd74	1	14	23	19	33	297	29	26	29	45	3	762	69	114	130	235	335	155	177	92	130	50	192
Cd79a	0	0	0	1	1	0	0	1	0	0	0	3	0	0	0	0	0	0	0	0	0	0	0
Cd79b	1	3	6	2	17	16	2	3	3	5	0	31	1	3	11	10	13	7	9	5	3	1	8
Cd80	0	0	4	1	2	0	0	0	0	1	0	0	0	1	1	0	1	1	0	0	0	2	0
Cd81	0	0	1	4	2	2	0	1	0	0	0	17	1	3	1	0	2	0	2	0	1	1	2
Cd82	5	81	176	180	190	153	118	194	178	405	38	236	40	75	171	138	194	113	133	86	112	37	150
Cd83	1	2	1	0	1	0	1	0	1	1	0	14	0	2	2	2	0	0	4	1	1	0	11
Cd84	0	7	28	21	31	35	16	25	18	27	3	34	12	20	34	26	35	23	25	12	20	5	28
Cd86	1	1	8	3	8	6	0	5	9	10	2	9	1	1	4	2	5	9	4	2	11	2	9
Cd8a	15	237	522	459	638	543	258	409	238	459	97	536	111	262	539	348	598	247	225	132	196	70	283
Cd8b1	23	313	672	608	1248	827	296	577	340	731	90	900	254	381	951	665	1025	387	482	288	366	139	599
Cd9	0	3	3	3	1	9	0	1	2	4	1	20	8	5	6	4	10	6	8	6	5	1	7
Cd9-ps	0	0	0	0	0	0	0	0	0	0	0	0	0	0	0	0	0	0	0	0	0	0	0
Cd93	0	0	1	1	0	0	0	0	0	1	0	0	0	0	0	1	2	0	0	0	0	0	0
Cd96	1	16	33	38	65	38	17	33	24	59	11	43	12	28	59	41	38	21	20	18	30	14	39
Cd99l2	0	2	1	3	3	3	1	3	3	6	0	1	0	1	6	2	2	1	0	0	1	0	3
Cdadc1	0	5	9	4	22	12	6	12	13	19	4	13	4	8	15	5	20	13	6	5	12	1	20
Cdan1	0	1	2	2	1	2	1	0	0	2	0	6	1	3	0	2	2	1	4	0	1	0	2
Cdc123	1	21	44	45	72	65	17	23	10	47	9	55	16	39	43	20	50	28	34	20	33	11	42
Cdc14a	1	5	5	3	2	4	9	8	3	9	1	4	3	7	5	1	9	2	5	4	1	1	8
Cdc14b	0	0	2	3	2	6	0	0	0	3	1	8	0	3	4	0	1	1	1	2	1	3	1
Cdc16	0	2	3	5	12	6	3	6	0	8	1	8	4	5	3	8	16	2	6	2	3	3	7
Cdc20	0	3	5	2	3	3	1	2	0	0	0	4	0	1	3	2	7	2	2	0	4	1	3
Cdc20b	0	0	0	0	0	2	0	0	0	0	0	0	0	0	0	0	1	0	0	0	0	0	0
Cdc23	1	4	12	16	9	14	8	11	6	12	0	21	4	11	11	8	15	8	8	4	6	4	10
Cdc25a	0	2	5	6	2	2	6	4	1	2	0	6	0	1	4	1	5	2	5	0	3	1	1
Cdc25b	0	5	16	8	22	8	5	12	8	24	1	23	9	6	18	10	16	8	11	9	13	5	18
Cdc25c	0	0	0	0	0	0	1	0	0	0	0	0	0	0	0	0	0	0	1	0	0	0	0
Cdc26	4	11	16	23	22	28	9	9	11	18	2	30	6	15	14	10	13	16	15	7	16	3	28
Cdc27	1	2	4	2	3	1	2	4	6	2	0	14	1	7	7	5	6	2	7	3	4	1	4
Cdc34	0	15	20	17	31	22	7	18	11	13	2	21	2	15	12	10	25	11	10	5	15	2	20
Cdc34b	0	0	1	1	3	2	1	0	1	0	0	1	1	1	0	0	1	2	1	0	2	0	1
Cdc37	9	36	81	83	140	92	45	70	30	87	20	143	39	35	139	94	110	65	57	47	69	16	80
Cdc37l1	0	6	13	11	20	20	4	16	4	21	1	46	2	13	18	11	16	11	9	5	10	2	13
Cdc40	1	8	16	13	22	20	5	11	8	24	5	24	8	11	29	23	20	18	12	6	12	10	20
Cdc42	4	76	163	127	248	211	87	149	96	172	23	228	58	122	224	141	202	114	116	76	103	55	154
Cdc42bpa	0	0	0	0	0	0	0	0	0	0	0	0	0	0	0	0	0	0	0	0	0	0	0
Cdc42bpb	0	0	0	0	2	0	0	0	0	0	0	1	0	0	0	1	0	0	0	0	0	0	0
Cdc42bpg	0	0	0	0	1	0	1	1	0	2	0	0	0	2	2	1	1	0	0	1	0	0	0
Cdc42ep1	0	1	2	3	2	1	0	0	0	0	0	1	0	0	0	1	0	1	0	0	0	0	0
Cdc42ep2	0	1	0	0	0	0	0	0	0	0	0	0	0	0	0	0	0	0	0	0	0	0	0
Cdc42ep3	1	17	42	38	51	62	22	34	16	29	3	51	11	35	46	42	56	29	24	17	11	21	20
Cdc42ep4	0	0	0	0	1	4	0	1	1	1	0	2	0	0	1	0	0	1	0	1	2	1	0
Cdc42ep5	0	0	0	1	0	0	0	0	0	0	0	0	0	0	0	0	0	0	0	0	0	0	0
Cdc42se1	3	51	112	94	153	128	47	103	46	125	31	181	50	78	130	85	128	76	90	40	74	24	122
Cdc42se2	3	35	66	80	92	101	51	61	57	95	14	103	30	59	93	81	93	57	74	44	54	17	69
[truncated: 19,715 more rows]
